# Supplementary material for: Trigonal bipyramidal or square planar? Density functional theory calculations of iron bis(dithiolene) N-heterocyclic carbene complexes
Source: Royal Society of Chemistry journal article supplement (doi:10.1039/d4dt02650k), 2024-01-01
Supplement: d4dt02650k1.zip [file d4dt02650k1.zip]

## Sheet: Sheet1
R1	R2	alpha	beta	tau	HEP	HEP-CS	N(HEP)	TEP	N(TEP)	Se-NMR	Se-NMR-CS	N(SeNMR)	C-NMR	C-NM-CS	N(C-NMR)	P-NMR	P-NMR-CS	N(P-NMR)	bv	N(BV)
H	H	163.4	165.3	0.0316667	-26.4587	207.208	0.547461	2036.36	0.504872	1695.29	-3.29088	0.154447	-14.953	195.702	0.193442	285.482	-28.5194	0.389726	21.8	0.00636943
Amine (-NH2)	H	152.7	161.2	0.141667	-27.5459	208.295	0.568267	2035.96	0.490437	1762.37	-70.3699	0.102766	-12.578	193.327	0.169048	290.765	-33.8024	0.365766	26.5	0.305732
H	Hydroxy (-OH-)	163.4	165.3	0.0316667	-36.9092	217.658	0.74746	2036.23	0.50018	1697.36	-5.35788	0.152855	-6.792	187.541	0.109618	340.602	-83.6394	0.139739	21.7	0
H	Amine (-NH2)	164	165.3	0.0216667	-15.4097	196.159	0.336007	2032.68	0.372068	1767.48	-75.4849	0.0988256	-33.454	214.203	0.383472	317.659	-60.6964	0.243793	21.7	0
H	Methyl	164.6	164.7	0.00166667	-12.6474	193.396	0.283141	2033.15	0.389029	1667.46	24.5411	0.175891	-43.614	224.363	0.487829	307.343	-50.3804	0.290579	21.7	0
-F	H	158.4	158.9	0.00833333	-13.6963	194.445	0.303215	2050.08	1	1649.92	42.0751	0.1894	-16.842	197.591	0.212845	278.34	-21.3774	0.422117	24.4	0.171975
-Cl	H	152.4	156.2	0.0633333	-14.7673	195.516	0.323712	2044.11	0.784554	1613.07	78.9231	0.217789	-33.158	213.907	0.380432	275.763	-18.8004	0.433804	27.2	0.350318
Aldehyde (-CHO)	H	153.9	154.5	0.01	-29.1329	209.882	0.598638	2049.42	0.976182	1501.17	190.823	0.304003	-46.535	227.284	0.517831	273.378	-16.4154	0.444621	27.5	0.369427
H	-Cl	164	164.7	0.0116667	-22.2215	202.971	0.46637	2041.12	0.676651	1497.77	194.224	0.306623	-37.77	218.519	0.427803	181.434	75.5286	0.861616	21.8	0.00636943
H	Carboxylic Acid	163.4	163.8	0.00666667	2.14743	178.602	0	2044.74	0.80729	1607.43	84.5671	0.222138	-16.908	197.657	0.213523	167.126	89.8366	0.926507	21.9	0.0127389
alkene	H	151.1	156.4	0.0883333	-30.6112	211.36	0.626931	2033.22	0.391555	1636.25	55.7483	0.199934	-60.1057	240.855	0.657221	287.795	-30.8321	0.379237	27.6	0.375796
alkyne	H	130.1	173.3	0.72	-32.1576	212.907	0.656526	2043.6	0.766149	1370.13	321.866	0.404965	-63.0104	243.759	0.687055	228.065	28.8978	0.650131	24.2	0.159236
Br	H	139.4	166.4	0.45	-29.7599	210.509	0.610639	2041.05	0.674125	1377.72	314.274	0.399116	-45.2888	226.038	0.505031	224.374	32.589	0.666871	28	0.401274
Ester	H	129.2	173	0.73	-13.887	194.636	0.306864	2041.79	0.70083	852.654	839.344	0.803656	-93.4782	274.227	1	179.723	77.2395	0.869376	29	0.464968
ether	H	141	169.8	0.48	-26.6812	207.43	0.551718	2039.87	0.631541	1728.26	-36.2628	0.129044	3.88027	176.869	0	272.997	-16.0347	0.446348	27.6	0.375796
Ketone	H	144.5	165.6	0.351667	-21.328	202.077	0.44927	2042.44	0.724287	597.81	1094.19	1	-79.4709	260.22	0.856126	191.039	65.9239	0.818055	28.6	0.43949
SH	H	137.8	169.4	0.526667	-8.77015	189.519	0.208939	2042.53	0.727535	1637.73	54.2646	0.198791	-71.8569	252.606	0.77792	371.413	-114.451	0	28	0.401274
H	alkane	162.8	165.2	0.04	-23.4736	204.223	0.490331	2032.42	0.362685	1738.11	-46.1171	0.121452	-38.6414	219.39	0.436754	291.676	-34.7135	0.361633	21.7	0
H	alkyne	163.7	164.3	0.01	-16.4538	197.203	0.355988	2040.03	0.637315	1697.13	-5.1328	0.153028	-38.1769	218.926	0.431983	279.872	-22.9095	0.415168	21.8	0.00636943
H	benzene	164.3	164.7	0.00666667	-43.9955	224.745	0.883077	2034.05	0.421508	1720.23	-28.2375	0.135227	-42.2622	223.011	0.473944	289.512	-32.549	0.37145	21.8	0.00636943
H	Br	164.1	164.7	0.01	-21.6089	202.358	0.454645	2041.05	0.674125	1586.39	105.608	0.238349	-36.6837	217.433	0.416646	272.912	-15.9498	0.446733	21.8	0.00636943
H	Ester	163.5	164.1	0.01	-14.5905	195.34	0.320328	2042.45	0.724648	1639.05	52.9519	0.19778	-38.7007	219.45	0.437363	278.751	-21.788	0.420255	21.8	0.00636943
H	ether	164.2	165.3	0.0183333	-25.3758	206.125	0.526736	2034	0.419704	1710.49	-18.4879	0.142739	-25.8284	206.577	0.305147	288.805	-31.842	0.374657	21.7	0
H	I	164	164.3	0.005	-23.8234	204.572	0.497026	2039.27	0.609888	1539.4	152.6	0.274554	-41.4029	222.152	0.465118	261.111	-4.14813	0.500257	21.8	0.00636943
H	Ketone	163.1	163.3	0.00333333	-20.2705	201.02	0.429032	2042.25	0.717431	1583.43	108.567	0.240628	-40.8414	221.59	0.45935	282.453	-25.4909	0.403461	21.8	0.00636943
H	SH	164	164.6	0.01	-23.1204	203.87	0.483573	2038.47	0.581018	1638.37	53.6303	0.198302	-36.5361	217.285	0.415129	281.264	-24.3013	0.408856	21.8	0.00636943
CH3	H	136.215	171.678	0.59105	-28.8932	209.642	0.594052	2032.43	0.363046	1722.68	-30.6869	0.13334	-29.0059	209.755	0.337784	307.08	-50.1172	0.291773	27.3	0.356688
CH3	CH3	122.067	179.005	0.948967	-25.6599	206.409	0.532174	2029.35	0.251895	1732.44	-40.4393	0.125826	-25.1246	205.874	0.297919	310.628	-53.6658	0.275679	27.4	0.363057
CH3	NH2	132.958	175.378	0.707	-30.3346	211.084	0.621637	2028.49	0.220859	1735.81	-43.8175	0.123224	-26.3598	207.109	0.310606	314.091	-57.1288	0.259974	27.5	0.369427
CH3	NO2	148.986	155.838	0.1142	-26.1383	206.887	0.541329	2046.12	0.857091	1558.21	133.784	0.260057	-39.2868	220.036	0.443383	267.34	-10.3779	0.472003	27.8	0.388535
CH3	OH	136.116	171.738	0.5937	-31.0217	211.771	0.634786	2031.76	0.338867	1763.43	-71.4375	0.101944	-9.29578	190.045	0.135335	314.873	-57.9106	0.256428	27.3	0.356688
CH3	SH	136.116	170.863	0.579117	-19.0803	199.829	0.406254	2034.81	0.448935	1699.13	-7.12866	0.151491	-27.7354	208.484	0.324734	264.732	-7.7697	0.483832	27.5	0.369427
CH3	F	143.336	165.036	0.361667	-26.9269	207.676	0.556421	2036.13	0.496572	1746.39	-54.3887	0.115079	-5.12089	185.87	0.0924537	308.302	-51.3395	0.28623	27.2	0.350318
CH3	Cl	139.753	167.303	0.459167	-23.6665	204.416	0.494023	2036.82	0.521472	1635.65	56.3504	0.200398	-22.7433	203.492	0.273459	292.992	-36.029	0.355667	27.4	0.363057
CH3	Br	138.483	168.333	0.4975	-23.9342	204.683	0.499147	2036.58	0.512811	1599.65	92.35	0.228134	-27.5204	208.269	0.322526	284.592	-27.6295	0.393762	27.5	0.369427
CH3	I	137.278	169.092	0.530233	-29.8224	210.571	0.611835	2035.85	0.486467	1523.27	168.726	0.286978	-32.3766	213.126	0.372406	265.308	-8.34509	0.481223	27.5	0.369427
CH3	alde	148.556	157.165	0.143483	-27.6142	208.363	0.569575	2041.83	0.702274	1663.03	28.9643	0.179299	-50.4574	231.206	0.558119	275.484	-18.5215	0.435069	27.7	0.382166
CH3	Ketone	132.13	172.554	0.673733	-30.5145	211.264	0.625081	2038.42	0.579213	1895.75	-203.755	0	-47.1833	227.932	0.52449	280.934	-23.9714	0.410352	27.9	0.394904
CH3	ester	140.143	165.804	0.427683	-32.7724	213.522	0.668292	2037.33	0.539877	1701.9	-9.90608	0.149351	-36.9695	217.719	0.419581	285.114	-28.151	0.391397	27.7	0.382166
CH3	ether	131.806	176.189	0.739717	-21.715	202.464	0.456677	2030.08	0.278239	1746.32	-54.3276	0.115126	-18.1433	198.892	0.226211	306.866	-49.9034	0.292743	27.6	0.375796
CH3	benzene	129.482	175.69	0.770133	-29.8551	210.604	0.612461	2030.14	0.280404	1657.48	34.5163	0.183576	-40.588	221.337	0.456747	300.32	-43.3571	0.322432	27.8	0.388535
C(CH3)3	H	99.6138	176.623	1.28349	-36.3624	217.111	0.736996	2022.98	0.0220137	1559.87	132.124	0.258778	-32.6161	213.365	0.374865	283.268	-26.3052	0.399768	37.2	0.987261
C(CH3)3	benzene	99.8205	178.716	1.31493	-45.9546	226.704	0.92057	2024.79	0.0873331	1387.77	304.228	0.391376	-30.04	210.789	0.348406	325.559	-68.596	0.207966	36.8	0.961783
C(CH3)3	CH3	99.6832	178.202	1.30865	-48.1544	228.903	0.96267	2024.18	0.0653194	1339.55	352.445	0.428524	-34.6226	215.372	0.395475	251.842	5.12044	0.542293	36.5	0.942675
C(CH3)3	OH	99.5452	177.311	1.2961	-50.105	230.854	1	2022.37	0	1518.18	173.818	0.290901	-9.97341	190.722	0.142296	278.017	-21.0544	0.423582	36.2	0.923567
C(CH3)3	SH	99.8665	177.924	1.30096	-35.1135	215.863	0.713094	2028.93	0.236738	1337.92	354.072	0.429778	-36.7424	217.492	0.417249	215.428	41.535	0.707444	36	0.910828
C(CH3)3	F	99.3299	177.239	1.29849	-47.9711	228.72	0.959161	2025.96	0.129556	1515.59	176.407	0.292896	-9.94839	190.697	0.142039	254.454	2.50815	0.530445	36.1	0.917197
C(CH3)3	Cl	99.9484	177.664	1.29526	-35.5176	216.267	0.720829	2025.87	0.126308	1306.85	385.144	0.453717	-32.7814	213.53	0.376564	201.715	55.2474	0.769634	35.5	0.878981
C(CH3)3	Br	100.362	177.845	1.29138	-37.5987	218.348	0.760656	2025.34	0.107182	1187.61	504.39	0.54559	-37.2914	218.04	0.422887	179.002	77.9608	0.872647	35.5	0.878981
C(CH3)3	I	100.678	178.084	1.2901	-30.3592	211.108	0.622108	2024.49	0.0765067	975.309	716.688	0.709156	-47.9597	228.709	0.532464	150.921	106.041	1	35.6	0.88535
C(CH3)3	NH2	101.204	177.387	1.26972	-33.5216	214.271	0.68263	2023.83	0.0526886	1481.73	210.271	0.318987	-22.5998	203.349	0.271985	262.231	-5.26812	0.495178	36	0.910828
C(CH3)3	NO2	99.4134	179.775	1.33936	-30.9453	211.694	0.633324	2036.45	0.50812	1071.16	620.832	0.635304	-36.0561	216.805	0.410199	172.189	84.7736	0.903545	37.2	0.987261
C(CH3)3	ether	99.2009	177.791	1.30983	-43.2488	223.998	0.868788	2024.62	0.0811981	1404.49	287.507	0.378493	-15.4429	196.192	0.198475	248.305	8.65798	0.558337	36.6	0.949045
C(CH3)3	ketone	100.134	178.18	1.30077	-39.0785	219.828	0.788977	2028.82	0.232768	1297.06	394.939	0.461264	-38.7094	219.458	0.437452	205.389	51.5734	0.752972	37.1	0.980892
C(CH3)3	alde	99.9284	178.506	1.30963	-25.3241	206.073	0.525747	2034.5	0.437748	1092.52	599.476	0.618849	-41.2047	221.954	0.463082	222.926	34.0361	0.673435	37.1	0.980892
C(CH3)3	ester	98.8342	178.831	1.33328	-44.9423	225.691	0.901198	2029.6	0.260917	1279.42	412.578	0.474854	-39.7663	220.515	0.448307	214.179	42.7836	0.713107	37.4	1
TMS	180.749			Max		230.854		2050.08			1094.19			274.227			106.041		37.4
Se(CH3)2	1692			Min		178.602		2022.37			-203.755			176.869			-114.451		21.7
P(PH)3	261.663
PH3	558.797	-301.834

## Sheet: Sheet2
R1	R2	alpha	beta	tau	HEP	HEP-CS	N(HEP)	TEP	N(TEP)	Se-NMR	Se-NMR-CS	N(SeNMR)	C-NMR	C-NM-CS	N(C-NMR)	P-NMR	P-NMR-CS	N(P-NMR)	bv	N(BV)
H	H	163.4	165.3	0.0316667	-26.4587	207.208	0.547461	2036.36	0.504872	1695.29	-3.29088	0.154447	-14.953	195.702	0.193442	285.482	-28.5194	0.389726	21.8	0.00636943
Amine (-NH2)	H	152.7	161.2	0.141667	-27.5459	208.295	0.568267	2035.96	0.490437	1762.37	-70.3699	0.102766	-12.578	193.327	0.169048	290.765	-33.8024	0.365766	26.5	0.305732
H	Hydroxy (-OH-)	163.4	165.3	0.0316667	-36.9092	217.658	0.74746	2036.23	0.50018	1697.36	-5.35788	0.152855	-6.792	187.541	0.109618	340.602	-83.6394	0.139739	21.7	0
H	Amine (-NH2)	164	165.3	0.0216667	-15.4097	196.159	0.336007	2032.68	0.372068	1767.48	-75.4849	0.0988256	-33.454	214.203	0.383472	317.659	-60.6964	0.243793	21.7	0
H	Methyl	164.6	164.7	0.00166667	-12.6474	193.396	0.283141	2033.15	0.389029	1667.46	24.5411	0.175891	-43.614	224.363	0.487829	307.343	-50.3804	0.290579	21.7	0
-F	H	158.4	158.9	0.00833333	-13.6963	194.445	0.303215	2050.08	1	1649.92	42.0751	0.1894	-16.842	197.591	0.212845	278.34	-21.3774	0.422117	24.4	0.171975
-Cl	H	152.4	156.2	0.0633333	-14.7673	195.516	0.323712	2044.11	0.784554	1613.07	78.9231	0.217789	-33.158	213.907	0.380432	275.763	-18.8004	0.433804	27.2	0.350318
Aldehyde (-CHO)	H	153.9	154.5	0.01	-29.1329	209.882	0.598638	2049.42	0.976182	1501.17	190.823	0.304003	-46.535	227.284	0.517831	273.378	-16.4154	0.444621	27.5	0.369427
H	-Cl	164	164.7	0.0116667	-22.2215	202.971	0.46637	2041.12	0.676651	1497.77	194.224	0.306623	-37.77	218.519	0.427803	181.434	75.5286	0.861616	21.8	0.00636943
H	Carboxylic Acid	163.4	163.8	0.00666667	2.14743	178.602	0	2044.74	0.80729	1607.43	84.5671	0.222138	-16.908	197.657	0.213523	167.126	89.8366	0.926507	21.9	0.0127389
alkene	H	151.1	156.4	0.0883333	-30.6112	211.36	0.626931	2033.22	0.391555	1636.25	55.7483	0.199934	-60.1057	240.855	0.657221	287.795	-30.8321	0.379237	27.6	0.375796
alkyne	H	130.1	173.3	0.72	-32.1576	212.907	0.656526	2043.6	0.766149	1370.13	321.866	0.404965	-63.0104	243.759	0.687055	228.065	28.8978	0.650131	24.2	0.159236
Br	H	139.4	166.4	0.45	-29.7599	210.509	0.610639	2041.05	0.674125	1377.72	314.274	0.399116	-45.2888	226.038	0.505031	224.374	32.589	0.666871	28	0.401274
Ester	H	129.2	173	0.73	-13.887	194.636	0.306864	2041.79	0.70083	852.654	839.344	0.803656	-93.4782	274.227	1	179.723	77.2395	0.869376	29	0.464968
ether	H	141	169.8	0.48	-26.6812	207.43	0.551718	2039.87	0.631541	1728.26	-36.2628	0.129044	3.88027	176.869	0	272.997	-16.0347	0.446348	27.6	0.375796
Ketone	H	144.5	165.6	0.351667	-21.328	202.077	0.44927	2042.44	0.724287	597.81	1094.19	1	-79.4709	260.22	0.856126	191.039	65.9239	0.818055	28.6	0.43949
SH	H	137.8	169.4	0.526667	-8.77015	189.519	0.208939	2042.53	0.727535	1637.73	54.2646	0.198791	-71.8569	252.606	0.77792	371.413	-114.451	0	28	0.401274
H	alkane	162.8	165.2	0.04	-23.4736	204.223	0.490331	2032.42	0.362685	1738.11	-46.1171	0.121452	-38.6414	219.39	0.436754	291.676	-34.7135	0.361633	21.7	0
H	alkyne	163.7	164.3	0.01	-16.4538	197.203	0.355988	2040.03	0.637315	1697.13	-5.1328	0.153028	-38.1769	218.926	0.431983	279.872	-22.9095	0.415168	21.8	0.00636943
H	benzene	164.3	164.7	0.00666667	-43.9955	224.745	0.883077	2034.05	0.421508	1720.23	-28.2375	0.135227	-42.2622	223.011	0.473944	289.512	-32.549	0.37145	21.8	0.00636943
H	Br	164.1	164.7	0.01	-21.6089	202.358	0.454645	2041.05	0.674125	1586.39	105.608	0.238349	-36.6837	217.433	0.416646	272.912	-15.9498	0.446733	21.8	0.00636943
H	Ester	163.5	164.1	0.01	-14.5905	195.34	0.320328	2042.45	0.724648	1639.05	52.9519	0.19778	-38.7007	219.45	0.437363	278.751	-21.788	0.420255	21.8	0.00636943
H	ether	164.2	165.3	0.0183333	-25.3758	206.125	0.526736	2034	0.419704	1710.49	-18.4879	0.142739	-25.8284	206.577	0.305147	288.805	-31.842	0.374657	21.7	0
H	I	164	164.3	0.005	-23.8234	204.572	0.497026	2039.27	0.609888	1539.4	152.6	0.274554	-41.4029	222.152	0.465118	261.111	-4.14813	0.500257	21.8	0.00636943
H	Ketone	163.1	163.3	0.00333333	-20.2705	201.02	0.429032	2042.25	0.717431	1583.43	108.567	0.240628	-40.8414	221.59	0.45935	282.453	-25.4909	0.403461	21.8	0.00636943
H	SH	164	164.6	0.01	-23.1204	203.87	0.483573	2038.47	0.581018	1638.37	53.6303	0.198302	-36.5361	217.285	0.415129	281.264	-24.3013	0.408856	21.8	0.00636943
CH3	H	136.215	171.678	0.59105	-28.8932	209.642	0.594052	2032.43	0.363046	1722.68	-30.6869	0.13334	-29.0059	209.755	0.337784	307.08	-50.1172	0.291773	27.3	0.356688
CH3	CH3	122.067	179.005	0.948967	-25.6599	206.409	0.532174	2029.35	0.251895	1732.44	-40.4393	0.125826	-25.1246	205.874	0.297919	310.628	-53.6658	0.275679	27.4	0.363057
CH3	NH2	132.958	175.378	0.707	-30.3346	211.084	0.621637	2028.49	0.220859	1735.81	-43.8175	0.123224	-26.3598	207.109	0.310606	314.091	-57.1288	0.259974	27.5	0.369427
CH3	NO2	148.986	155.838	0.1142	-26.1383	206.887	0.541329	2046.12	0.857091	1558.21	133.784	0.260057	-39.2868	220.036	0.443383	267.34	-10.3779	0.472003	27.8	0.388535
CH3	OH	136.116	171.738	0.5937	-31.0217	211.771	0.634786	2031.76	0.338867	1763.43	-71.4375	0.101944	-9.29578	190.045	0.135335	314.873	-57.9106	0.256428	27.3	0.356688
CH3	SH	136.116	170.863	0.579117	-19.0803	199.829	0.406254	2034.81	0.448935	1699.13	-7.12866	0.151491	-27.7354	208.484	0.324734	264.732	-7.7697	0.483832	27.5	0.369427
CH3	F	143.336	165.036	0.361667	-26.9269	207.676	0.556421	2036.13	0.496572	1746.39	-54.3887	0.115079	-5.12089	185.87	0.0924537	308.302	-51.3395	0.28623	27.2	0.350318
CH3	Cl	139.753	167.303	0.459167	-23.6665	204.416	0.494023	2036.82	0.521472	1635.65	56.3504	0.200398	-22.7433	203.492	0.273459	292.992	-36.029	0.355667	27.4	0.363057
CH3	Br	138.483	168.333	0.4975	-23.9342	204.683	0.499147	2036.58	0.512811	1599.65	92.35	0.228134	-27.5204	208.269	0.322526	284.592	-27.6295	0.393762	27.5	0.369427
CH3	I	137.278	169.092	0.530233	-29.8224	210.571	0.611835	2035.85	0.486467	1523.27	168.726	0.286978	-32.3766	213.126	0.372406	265.308	-8.34509	0.481223	27.5	0.369427
CH3	alde	148.556	157.165	0.143483	-27.6142	208.363	0.569575	2041.83	0.702274	1663.03	28.9643	0.179299	-50.4574	231.206	0.558119	275.484	-18.5215	0.435069	27.7	0.382166
CH3	Ketone	132.13	172.554	0.673733	-30.5145	211.264	0.625081	2038.42	0.579213	1895.75	-203.755	0	-47.1833	227.932	0.52449	280.934	-23.9714	0.410352	27.9	0.394904
CH3	ester	140.143	165.804	0.427683	-32.7724	213.522	0.668292	2037.33	0.539877	1701.9	-9.90608	0.149351	-36.9695	217.719	0.419581	285.114	-28.151	0.391397	27.7	0.382166
CH3	ether	131.806	176.189	0.739717	-21.715	202.464	0.456677	2030.08	0.278239	1746.32	-54.3276	0.115126	-18.1433	198.892	0.226211	306.866	-49.9034	0.292743	27.6	0.375796
CH3	benzene	129.482	175.69	0.770133	-29.8551	210.604	0.612461	2030.14	0.280404	1657.48	34.5163	0.183576	-40.588	221.337	0.456747	300.32	-43.3571	0.322432	27.8	0.388535
C(CH3)3	H	99.6138	176.623	1.28349	-36.3624	217.111	0.736996	2022.98	0.0220137	1559.87	132.124	0.258778	-32.6161	213.365	0.374865	283.268	-26.3052	0.399768	37.2	0.987261
C(CH3)3	benzene	99.8205	178.716	1.31493	-45.9546	226.704	0.92057	2024.79	0.0873331	1387.77	304.228	0.391376	-30.04	210.789	0.348406	325.559	-68.596	0.207966	36.8	0.961783
C(CH3)3	CH3	99.6832	178.202	1.30865	-48.1544	228.903	0.96267	2024.18	0.0653194	1339.55	352.445	0.428524	-34.6226	215.372	0.395475	251.842	5.12044	0.542293	36.5	0.942675
C(CH3)3	OH	99.5452	177.311	1.2961	-50.105	230.854	1	2022.37	0	1518.18	173.818	0.290901	-9.97341	190.722	0.142296	278.017	-21.0544	0.423582	36.2	0.923567
C(CH3)3	SH	99.8665	177.924	1.30096	-35.1135	215.863	0.713094	2028.93	0.236738	1337.92	354.072	0.429778	-36.7424	217.492	0.417249	215.428	41.535	0.707444	36	0.910828
C(CH3)3	F	99.3299	177.239	1.29849	-47.9711	228.72	0.959161	2025.96	0.129556	1515.59	176.407	0.292896	-9.94839	190.697	0.142039	254.454	2.50815	0.530445	36.1	0.917197
C(CH3)3	Cl	99.9484	177.664	1.29526	-35.5176	216.267	0.720829	2025.87	0.126308	1306.85	385.144	0.453717	-32.7814	213.53	0.376564	201.715	55.2474	0.769634	35.5	0.878981
C(CH3)3	Br	100.362	177.845	1.29138	-37.5987	218.348	0.760656	2025.34	0.107182	1187.61	504.39	0.54559	-37.2914	218.04	0.422887	179.002	77.9608	0.872647	35.5	0.878981
C(CH3)3	I	100.678	178.084	1.2901	-30.3592	211.108	0.622108	2024.49	0.0765067	975.309	716.688	0.709156	-47.9597	228.709	0.532464	150.921	106.041	1	35.6	0.88535
C(CH3)3	NH2	101.204	177.387	1.26972	-33.5216	214.271	0.68263	2023.83	0.0526886	1481.73	210.271	0.318987	-22.5998	203.349	0.271985	262.231	-5.26812	0.495178	36	0.910828
C(CH3)3	NO2	99.4134	179.775	1.33936	-30.9453	211.694	0.633324	2036.45	0.50812	1071.16	620.832	0.635304	-36.0561	216.805	0.410199	172.189	84.7736	0.903545	37.2	0.987261
C(CH3)3	ether	99.2009	177.791	1.30983	-43.2488	223.998	0.868788	2024.62	0.0811981	1404.49	287.507	0.378493	-15.4429	196.192	0.198475	248.305	8.65798	0.558337	36.6	0.949045
C(CH3)3	ketone	100.134	178.18	1.30077	-39.0785	219.828	0.788977	2028.82	0.232768	1297.06	394.939	0.461264	-38.7094	219.458	0.437452	205.389	51.5734	0.752972	37.1	0.980892
C(CH3)3	alde	99.9284	178.506	1.30963	-25.3241	206.073	0.525747	2034.5	0.437748	1092.52	599.476	0.618849	-41.2047	221.954	0.463082	222.926	34.0361	0.673435	37.1	0.980892
C(CH3)3	ester	98.8342	178.831	1.33328	-44.9423	225.691	0.901198	2029.6	0.260917	1279.42	412.578	0.474854	-39.7663	220.515	0.448307	214.179	42.7836	0.713107	37.4	1
