# Supplementary material for: Trigonal bipyramidal or square planar? Density functional theory calculations of iron bis(dithiolene) N-heterocyclic carbene complexes
Source: Royal Society of Chemistry journal article supplement (doi:10.1039/d4dt02650k), 2024-01-01
Supplement: d4dt02650k2.pdf [file d4dt02650k2.pdf]

## Supporting Information:

# Trigonal Bipyramidal or Square Planar? Density Functional Theory calculations of iron bis(dithiolene) N-heterocyclic carbene complexes

Katherine Merkel<sup>a</sup>, Alyssa V. B. Santos<sup>a</sup>, Scott Simpson<sup>\*a</sup>

<sup>a</sup> Department of Chemistry, St. Bonaventure University, St. Bonaventure, NY 14778

\*corresponding author: [ssimpson@sbu.edu](mailto:ssimpson@sbu.edu)

## Contents

|                                                     |   |
|-----------------------------------------------------|---|
| <b>Information About Computed Properties:</b> ..... | 2 |
| <b>Information About Regression Models:</b> .....   | 2 |
| <b>Benchmarking to Experimental Data:</b> .....     | 2 |
| <b>Optimized Coordinates:</b> .....                 | 3 |

## Information About Computed Properties:

The Microsoft Excel sheet titled "Research Data Compilation-simplified.xlsx" contains all of the computed properties utilized in this study. The table includes the properties and their normalized values. For chemical shifts, isotropic shielding tensors are included and the chemical shift ( $\delta$ ) calculated from the isotropic shielding tensor as compared to a reference are indicated. For example for the HEP values, the column titled "HEP" is the HEP isotropic shielding tensor, the column titled "HEP-CS" is the HEP value as a chemical shift when referenced to TMS, and the column "N(HEP)" is the normalized value of the HEP chemical shift.

## Information About Regression Models:

The excel sheet titled "NormalizedRegressionModels.xlsx", data associated with the multivariable regression models can be found. Sheet 1 includes the model number, the number of variables in the model, the variables included in the model, the  $R^2$  value, the adjusted  $r^2$  value, the root-mean-square error, and the associated p-value for the regression model. Sheet 2 includes all AIC and BIC values for each regression model.

## Benchmarking to Experimental Data:

| R1                               | R2              | HEP Calc | HEP Exp             |
|----------------------------------|-----------------|----------|---------------------|
| CH <sub>3</sub>                  | H               | 209.64   | 179.91 <sup>1</sup> |
| C(CH <sub>3</sub> ) <sub>3</sub> | H               | 217.11   | 177.66 <sup>1</sup> |
| CH <sub>3</sub>                  | CH <sub>3</sub> | 206.41   | 180.80 <sup>2</sup> |
| CH <sub>3</sub>                  | Cl              | 204.41   | 177.56 <sup>2</sup> |
| CH <sub>3</sub>                  | Br              | 204.68   | 177.36 <sup>2</sup> |

| R1              | R2 | TEP Calc | TEP Exp           |
|-----------------|----|----------|-------------------|
| CH <sub>3</sub> | H  | 2032.43  | 2055 <sup>3</sup> |

| R1              | R2              | <sup>31</sup> P- $\delta$ Calc | <sup>31</sup> P- $\delta$ Exp             |
|-----------------|-----------------|--------------------------------|-------------------------------------------|
| CH <sub>3</sub> | CH <sub>3</sub> | -53.66                         | -53.5 <sup>3,4</sup> , -49.1 <sup>5</sup> |

| R1                               | R2              | <sup>77</sup> Se- $\delta$ Calc | <sup>77</sup> Se- $\delta$ Exp                            |
|----------------------------------|-----------------|---------------------------------|-----------------------------------------------------------|
| CH <sub>3</sub>                  | H               | -30.68                          | -2.53 <sup>1</sup>                                        |
| C(CH <sub>3</sub> ) <sub>3</sub> | H               | 132.12                          | 183.95 <sup>1</sup> , 197 <sup>3</sup> , 183 <sup>3</sup> |
| CH <sub>3</sub>                  | CH <sub>3</sub> | -40.44                          | 0.33 <sup>2</sup> , 3 <sup>3</sup>                        |
| CH <sub>3</sub>                  | Cl              | 56.35                           | 77.07 <sup>2</sup>                                        |
| CH <sub>3</sub>                  | Br              | 92.35                           | 91.69 <sup>2</sup>                                        |

The tables preceding this text contain experimental values obtained from literature (Exp) and our predicted values from DFT (Calc). Due to the limited amount of experimental

data from some of these properties, a comparison is not valid. Deviations may be the result of our DFT calculations being conducted in the gas-phase with the neglect of solvent. Others have studied the impact of solvation models on the calculation of Se-NMR chemical shifts and have noted its sensitivity to solvent.<sup>6</sup> This leaves a significant opportunity for a benchmarking study of these properties.

However, despite the deviation in values the general trends are conserved when considering changes in chemical shifts for Se-NMR. A plot of the experimental Se chemical shifts vs. our calculated values yields a  $R^2$  value of 0.9467 when fit with a simple linear regression. To make a definitive/conclusive argument, more benchmarking is needed.

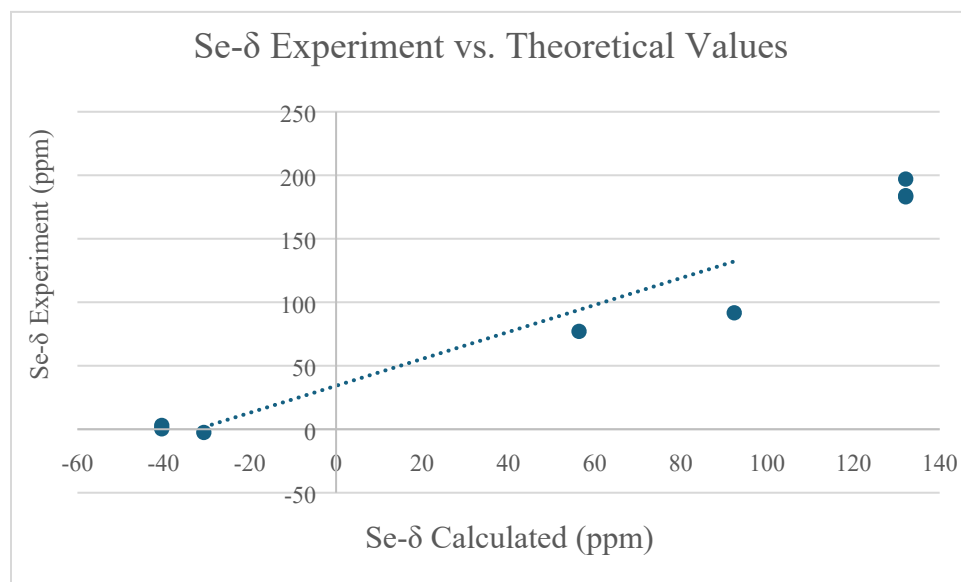

- (1) Barnett, C.; Cole, M. L.; Harper, J. B. Steric Properties of *N*-Heterocyclic Carbenes Affect the Performance of Electronic Probes. *Eur. J. Inorg. Chem.* **2021**, 2021 (47), 4954–4958. <https://doi.org/10.1002/ejic.202100796>.
- (2) Barnett, C.; Harper, J. B.; Cole, M. L. Correlating Electronic Properties of *N*-Heterocyclic Carbenes with Structure, and the Implications of Using Different Probes. *ChemistrySelect* **2022**, 7 (2), e202104348. <https://doi.org/10.1002/slct.202104348>.
- (3) Huynh, H. V. Electronic Properties of *N*-Heterocyclic Carbenes and Their Experimental Determination. *Chem. Rev.* **2018**, 118 (19), 9457–9492. <https://doi.org/10.1021/acs.chemrev.8b00067>.
- (4) Back, O.; Henry-Ellinger, M.; Martin, C. D.; Martin, D.; Bertrand, G. <sup>31</sup>P NMR Chemical Shifts of Carbene–Phosphinidene Adducts as an Indicator of the  $\pi$ -Accepting Properties of Carbenes. *Angew. Chem. Int. Ed.* **2013**, 52 (10), 2939–2943. <https://doi.org/10.1002/anie.201209109>.

(5) Krachko, T.; Slootweg, J. C. N-Heterocyclic Carbene–Phosphinidene Adducts: Synthesis, Properties, and Applications. *Eur. J. Inorg. Chem.* **2018**, 2018 (24), 2734–2754. <https://doi.org/10.1002/ejic.201800459>.

(6) Kondrashova, S. A.; Latypov, S. K. NMR “Finger Prints” of N-Heterocyclic Carbenes, DFT Analysis: Scopes and Limitations. *Molecules* **2023**, 28 (23), 7729. <https://doi.org/10.3390/molecules28237729>.

## Optimized Coordinates:

### TURBOMOLE Coordinates

*Fe-adduct R<sub>1</sub>=H R<sub>2</sub>=H*

22  
Energy = -3238.3286544420  
Fe 1.5668643 10.4941289 23.6426306  
S 3.7088708 10.1683863 23.4496571  
C 4.3197019 10.2231937 25.0452435  
C 3.4706895 10.4931662 26.0953626  
S 1.8091835 10.7737024 25.7934589  
S 1.4836537 10.7503024 21.4762916  
C -0.0561052 11.4315380 21.1667611  
C -0.8933844 11.7338683 22.2172589  
C 1.0311774 8.7047980 23.6928186  
N 1.3527779 7.7471092 24.6128219  
C 0.7680709 6.5223391 24.3211791  
H 0.9091325 5.6434858 24.9369671  
C 0.0504054 6.7044063 23.1791430  
H -0.5558982 6.0149972 22.6058953  
N 0.2242953 8.0333945 22.8176920  
S -0.3922464 11.4223439 23.8214937  
H -0.3254764 11.6450901 20.1295476  
H -1.8700338 12.1998852 22.0658496  
H 5.3919302 10.0702979 25.1895182  
H 3.8269767 10.5720815 27.1252583  
H 1.9312654 7.9605537 25.4187360  
H -0.1543207 8.4859414 21.9921853

*Fe-adduct R<sub>1</sub>=NH<sub>2</sub> R<sub>2</sub>=H*

26  
Energy = -3349.0222629640  
Fe 1.4699234 10.1755669 23.6650585  
S 3.6425724 10.0750617 23.6734646  
C 4.1174378 10.4826368 25.2686604  
C 3.1590482 10.7453186 26.2189563  
S 1.5013509 10.6738862 25.7986561  
S 1.6364998 10.3657068 21.4878292  
C 0.2654074 11.2714814 21.0093953

|   |            |            |            |
|---|------------|------------|------------|
| C | -0.6500118 | 11.6768903 | 21.9517415 |
| C | 0.9409584  | 8.3514051  | 23.7779912 |
| N | 1.4710972  | 7.3411817  | 24.5546374 |
| C | 0.8149895  | 6.1333533  | 24.3696432 |
| H | 1.1188558  | 5.2472338  | 24.9103696 |
| C | -0.1636005 | 6.3608360  | 23.4573370 |
| H | -0.9148226 | 5.7198298  | 23.0160443 |
| N | -0.0748378 | 7.7002895  | 23.1085594 |
| S | -0.4148742 | 11.2607148 | 23.5973137 |
| N | -0.9769620 | 8.2412949  | 22.1748425 |
| N | 2.5557304  | 7.4174850  | 25.4469231 |
| H | 0.1677580  | 11.5308913 | 19.9525474 |
| H | -1.5189622 | 12.2882870 | 21.6982322 |
| H | 5.1865884  | 10.5528991 | 25.4814651 |
| H | 3.4151631  | 11.0295665 | 27.2424334 |
| H | 3.3655995  | 7.7465836  | 24.9099540 |
| H | 2.3425058  | 8.1644166  | 26.1172643 |
| H | -1.4507992 | 9.0267665  | 22.6341071 |
| H | -0.4177054 | 8.6545771  | 21.4202433 |

*Fe-adduct R<sub>1</sub>=H R<sub>2</sub>=OH*

24

|          |                  |            |            |
|----------|------------------|------------|------------|
| Energy = | -3388.8437154960 |            |            |
| Fe       | 1.5269522        | 10.5040994 | 23.6454141 |
| S        | 3.6648308        | 10.1301676 | 23.4270666 |
| C        | 4.2987561        | 10.2258765 | 25.0141385 |
| C        | 3.4682553        | 10.5492316 | 26.0643075 |
| S        | 1.8093916        | 10.8450173 | 25.7757044 |
| S        | 1.4229755        | 10.7646554 | 21.4874769 |
| C        | -0.1268354       | 11.4202850 | 21.1876247 |
| C        | -0.9641868       | 11.7099809 | 22.2423518 |
| C        | 0.9841575        | 8.7170164  | 23.7194222 |
| N        | 1.6354080        | 7.6555455  | 24.2704711 |
| C        | 0.8964308        | 6.4694006  | 24.1503528 |
| C        | -0.2432102       | 6.8057367  | 23.4809512 |
| N        | -0.1745163       | 8.1662363  | 23.2334315 |
| S        | -0.4458223       | 11.4112790 | 23.8452449 |
| H        | -0.4070052       | 11.6246807 | 20.1514891 |
| H        | -1.9479409       | 12.1623877 | 22.0953967 |
| H        | 5.3705288        | 10.0612017 | 25.1494910 |
| H        | 3.8386864        | 10.6587106 | 27.0863664 |
| H        | 2.5679369        | 7.7337554  | 24.6642897 |
| H        | -0.8929856       | 8.7169760  | 22.7737501 |
| O        | 1.3542402        | 5.2397638  | 24.5273426 |
| H        | 1.2293666        | 5.1139381  | 25.4874236 |
| O        | -1.3194092       | 6.0957592  | 23.0650189 |
| H        | -1.1278750       | 5.1479585  | 23.1884838 |

*Fe-adduct R<sub>1</sub>=H R<sub>2</sub>=NH<sub>2</sub>*

26

Energy = -3349.0978575880

|    |            |            |            |
|----|------------|------------|------------|
| Fe | 1.5435944  | 10.3635071 | 23.6204262 |
| S  | 3.6713255  | 9.9540535  | 23.4101306 |
| C  | 4.2922553  | 9.9685618  | 25.0036724 |
| C  | 3.4580147  | 10.2563042 | 26.0612822 |
| S  | 1.8063512  | 10.5974055 | 25.7720824 |
| S  | 1.4611241  | 10.6591936 | 21.4624275 |
| C  | -0.0665833 | 11.3720803 | 21.1688203 |
| C  | -0.8924939 | 11.6808445 | 22.2272972 |
| C  | 0.9275358  | 8.5959497  | 23.6361453 |
| N  | 1.3392310  | 7.5562419  | 24.4023401 |
| C  | 0.6070930  | 6.3744521  | 24.1401093 |
| C  | -0.2813747 | 6.7107110  | 23.1535530 |
| N  | -0.0669778 | 8.0521005  | 22.8639097 |
| S  | -0.3872540 | 11.3444278 | 23.8259948 |
| H  | -0.3369383 | 11.6018697 | 20.1353816 |
| H  | -1.8586399 | 12.1711857 | 22.0855119 |
| H  | 5.3595250  | 9.7780023  | 25.1411667 |
| H  | 3.8221457  | 10.3100087 | 27.0901565 |
| H  | 2.0718534  | 7.6555319  | 25.0972781 |
| H  | -0.5279690 | 8.5817169  | 22.1307023 |
| N  | 0.7756345  | 5.1293590  | 24.7586596 |
| H  | 0.5953694  | 5.1291119  | 25.7635360 |
| H  | 1.6746753  | 4.6817953  | 24.5733107 |
| N  | -1.1778328 | 5.9259776  | 22.4327544 |
| H  | -1.1747647 | 4.9685723  | 22.7860145 |
| H  | -2.1324799 | 6.2885954  | 22.4304970 |

*Fe-adduct R<sub>1</sub>=H R<sub>2</sub>=CH<sub>3</sub>*

28

Energy = -3316.9978613800

|    |            |            |            |
|----|------------|------------|------------|
| Fe | 1.5590135  | 10.5286704 | 23.6444936 |
| S  | 3.6856004  | 10.1191999 | 23.4118837 |
| C  | 4.3246603  | 10.1527760 | 24.9985606 |
| C  | 3.5033228  | 10.4600197 | 26.0609882 |
| S  | 1.8508552  | 10.8057458 | 25.7851530 |
| S  | 1.4501308  | 10.8030769 | 21.4864256 |
| C  | -0.0805606 | 11.5112090 | 21.2011411 |
| C  | -0.9007968 | 11.8190879 | 22.2641758 |
| C  | 0.9679898  | 8.7548058  | 23.7063095 |
| N  | 1.4818199  | 7.7161388  | 24.4224025 |
| C  | 0.7771810  | 6.5259753  | 24.2225784 |
| C  | -0.2260294 | 6.8276274  | 23.3418637 |
| N  | -0.0810335 | 8.1863118  | 23.0481115 |
| S  | -0.3823098 | 11.4904414 | 23.8605611 |
| H  | -0.3588319 | 11.7361107 | 20.1686560 |
| H  | -1.8708053 | 12.3033483 | 22.1278913 |
| H  | 5.3926970  | 9.9607289  | 25.1273879 |
| H  | 3.8791444  | 10.5263696 | 27.0848863 |
| H  | 2.2874084  | 7.8323520  | 25.0283953 |
| H  | -0.6720327 | 8.7222525  | 22.4211502 |
| C  | 1.1532916  | 5.2556678  | 24.9016828 |

|   |            |           |            |
|---|------------|-----------|------------|
| H | 1.0935442  | 5.3475902 | 25.9975504 |
| H | 2.1797939  | 4.9478496 | 24.6482277 |
| H | 0.4792664  | 4.4451877 | 24.5990817 |
| C | -1.3045506 | 5.9945515 | 22.7425787 |
| H | -1.2525286 | 4.9677267 | 23.1238310 |
| H | -1.2212955 | 5.9478725 | 21.6454540 |
| H | -2.3038049 | 6.3895358 | 22.9840079 |

*Fe-adduct R<sub>1</sub>=F R<sub>2</sub>=H*

22

|          |                  |            |            |
|----------|------------------|------------|------------|
| Energy = | -3436.7247392010 |            |            |
| Fe       | 1.5342417        | 10.4169820 | 23.6539704 |
| S        | 3.6994895        | 10.1661908 | 23.5475858 |
| C        | 4.2682719        | 10.4478569 | 25.1297825 |
| C        | 3.3765141        | 10.7583185 | 26.1320561 |
| S        | 1.7106529        | 10.8580292 | 25.7832584 |
| S        | 1.5974189        | 10.7556380 | 21.4997798 |
| C        | 0.1574836        | 11.5887573 | 21.1273110 |
| C        | -0.7370027       | 11.8907668 | 22.1298768 |
| C        | 0.9896723        | 8.6379991  | 23.7090035 |
| N        | 1.4407821        | 7.5703780  | 24.4514062 |
| C        | 0.8071615        | 6.3631744  | 24.2547025 |
| H        | 1.0801827        | 5.4598655  | 24.7830348 |
| C        | -0.1425992       | 6.6224234  | 23.3076061 |
| H        | -0.8815503       | 5.9951388  | 22.8277131 |
| N        | 0.0070167        | 7.9617182  | 23.0223903 |
| S        | -0.3970889       | 11.4310808 | 23.7360551 |
| F        | -0.7981411       | 8.5670572  | 22.1071286 |
| F        | 2.4525008        | 7.6806251  | 25.3547979 |
| H        | -0.0097156       | 11.8846183 | 20.0889832 |
| H        | -1.6608338       | 12.4418165 | 21.9389956 |
| H        | 5.3454475        | 10.3949052 | 25.3045323 |
| H        | 3.6998952        | 10.9687500 | 27.1540302 |

*Fe-adduct R<sub>1</sub>=Cl R<sub>2</sub>=H*

22

|          |                  |            |            |
|----------|------------------|------------|------------|
| Energy = | -4157.5436811280 |            |            |
| Fe       | 1.4716498        | 10.3117414 | 23.6575274 |
| S        | 3.6297732        | 10.1190032 | 23.3536965 |
| C        | 4.3362678        | 10.5640963 | 24.8400692 |
| C        | 3.5335761        | 10.8967429 | 25.9076511 |
| S        | 1.8366736        | 10.8550190 | 25.7382705 |
| S        | 1.4071278        | 10.7618987 | 21.5242981 |
| C        | 0.0081966        | 11.7123726 | 21.3012511 |
| C        | -0.8140591       | 11.9814965 | 22.3718089 |
| C        | 0.9300778        | 8.5174963  | 23.7550053 |
| N        | 1.4500148        | 7.4561385  | 24.4929710 |
| C        | 0.7802841        | 6.2514259  | 24.3165238 |
| H        | 1.0769085        | 5.3468997  | 24.8299718 |
| C        | -0.2173207       | 6.5039649  | 23.4360281 |

|    |            |            |            |
|----|------------|------------|------------|
| H  | -0.9822872 | 5.8680472  | 23.0112791 |
| N  | -0.1129583 | 7.8518707  | 23.1145087 |
| S  | -0.4273195 | 11.3674622 | 23.9145902 |
| H  | -0.1868203 | 12.1083168 | 20.3018273 |
| H  | -1.7087772 | 12.6017695 | 22.2781342 |
| H  | 5.4267950  | 10.5952650 | 24.8989597 |
| H  | 3.9433601  | 11.2146560 | 26.8692251 |
| Cl | 2.7795043  | 7.5467915  | 25.5375894 |
| Cl | -1.1981773 | 8.5535054  | 22.0204437 |

*Fe-adduct R<sub>1</sub>=CHO R<sub>2</sub>=H*

26

|                           |            |            |            |
|---------------------------|------------|------------|------------|
| Energy = -3465.0842644890 |            |            |            |
| Fe                        | 1.4589008  | 10.2388807 | 23.6508087 |
| S                         | 3.6347712  | 10.1123178 | 23.6225086 |
| C                         | 4.1375381  | 10.6068901 | 25.1800141 |
| C                         | 3.1978024  | 10.9256636 | 26.1322790 |
| S                         | 1.5343948  | 10.8274596 | 25.7496219 |
| S                         | 1.6539812  | 10.5710870 | 21.5039950 |
| C                         | 0.2962986  | 11.5129368 | 21.0669416 |
| C                         | -0.6413783 | 11.8426753 | 22.0174276 |
| C                         | 0.9297706  | 8.4490978  | 23.7503747 |
| N                         | 1.4156591  | 7.4338405  | 24.5804657 |
| C                         | 0.7471515  | 6.2175907  | 24.3615648 |
| H                         | 1.0147933  | 5.3387514  | 24.9335159 |
| C                         | -0.1640241 | 6.4324278  | 23.3991045 |
| H                         | -0.8895192 | 5.7872203  | 22.9208947 |
| N                         | -0.0593306 | 7.7815601  | 23.0212559 |
| S                         | -0.4408862 | 11.3091054 | 23.6289378 |
| C                         | -0.9022013 | 8.3085409  | 22.0090722 |
| C                         | 2.4475885  | 7.5167948  | 25.5508662 |
| H                         | 0.2191671  | 11.8452191 | 20.0293684 |
| H                         | -1.5164097 | 12.4545395 | 21.7880584 |
| H                         | 5.2108705  | 10.6714929 | 25.3723765 |
| H                         | 3.4718903  | 11.2595810 | 27.1355995 |
| H                         | 2.8967561  | 8.5164972  | 25.6238995 |
| H                         | -0.7171260 | 9.3709337  | 21.7997086 |
| O                         | 2.7693767  | 6.5511493  | 26.2101506 |
| O                         | -1.7295653 | 7.6158370  | 21.4554001 |

*Fe-adduct R<sub>1</sub>=H R<sub>2</sub>=Cl*

22

|                           |           |            |            |
|---------------------------|-----------|------------|------------|
| Energy = -4157.6491516220 |           |            |            |
| Fe                        | 1.5160118 | 10.4060766 | 23.6114022 |
| S                         | 3.6380083 | 9.9771897  | 23.3723835 |
| C                         | 4.2772152 | 9.9774838  | 24.9577440 |
| C                         | 3.4599052 | 10.2757848 | 26.0263609 |
| S                         | 1.8113453 | 10.6419158 | 25.7584640 |



|    |            |            |            |
|----|------------|------------|------------|
| S  | 1.4135340  | 10.7183861 | 21.4567796 |
| C  | -0.1054295 | 11.4539334 | 21.1839779 |
| C  | -0.9183274 | 11.7629149 | 22.2528120 |
| C  | 0.8963107  | 8.6542245  | 23.6352904 |
| N  | 1.3579690  | 7.5989717  | 24.3740419 |
| C  | 0.6409112  | 6.4343637  | 24.1233175 |
| C  | -0.3079838 | 6.7598118  | 23.1958307 |
| N  | -0.1331490 | 8.1102271  | 22.9155986 |
| S  | -0.4041300 | 11.4059325 | 23.8429372 |
| H  | -0.3822873 | 11.6953950 | 20.1550196 |
| H  | -1.8806344 | 12.2642291 | 22.1248013 |
| H  | 5.3425464  | 9.7685110  | 25.0817150 |
| H  | 3.8362768  | 10.3198122 | 27.0512853 |
| H  | 2.1296328  | 7.6830154  | 25.0287236 |
| H  | -0.6844282 | 8.6477158  | 22.2533046 |
| Cl | 0.9757906  | 4.9546390  | 24.8892892 |
| Cl | -1.5079077 | 5.8068060  | 22.4605509 |

*Fe-adduct*  $R_1=H$   $R_2=(C(=O)OH)$

28

|          |                  |            |            |
|----------|------------------|------------|------------|
| Energy = | -3615.6655686450 |            |            |
| Fe       | 1.4825826        | 10.2660849 | 23.6377064 |
| S        | 3.6134465        | 9.8628096  | 23.4307272 |
| C        | 4.2318218        | 9.8810149  | 25.0231321 |
| C        | 3.3958845        | 10.1670566 | 26.0797610 |
| S        | 1.7452480        | 10.5025495 | 25.7897157 |
| S        | 1.4215832        | 10.6093452 | 21.4857426 |
| C        | -0.0879855       | 11.3540437 | 21.1934821 |
| C        | -0.9226328       | 11.6472242 | 22.2495595 |
| C        | 0.8706922        | 8.5297876  | 23.6374933 |
| N        | 1.3050258        | 7.4629897  | 24.3839267 |
| C        | 0.5876048        | 6.3084007  | 24.1329754 |
| C        | -0.3406584       | 6.6403316  | 23.1548939 |
| N        | -0.1433381       | 7.9791889  | 22.8940111 |
| S        | -0.4426125       | 11.2649556 | 23.8432890 |
| H        | -0.3438278       | 11.6077362 | 20.1621433 |
| H        | -1.8838325       | 12.1471355 | 22.1094895 |
| H        | 5.2982852        | 9.6883186  | 25.1608914 |
| H        | 3.7567336        | 10.2175691 | 27.1096662 |
| H        | 2.0691137        | 7.5203863  | 25.0534226 |
| H        | -0.6871498       | 8.4887935  | 22.1995665 |
| C        | 0.9460034        | 5.0639623  | 24.8303007 |
| C        | -1.3605104       | 5.9308647  | 22.3403710 |
| O        | 2.0366882        | 4.8696792  | 25.3129369 |
| O        | -2.1240583       | 6.5582942  | 21.6362009 |
| O        | -1.4100317       | 4.5764637  | 22.3883297 |
| O        | -0.0328505       | 4.0866964  | 24.8820640 |
| H        | -0.9188941       | 4.5033705  | 24.9000822 |
| H        | -0.6798413       | 4.2009071  | 22.9286090 |

HEP complex  $R_1=H$   $R_2=H$

45

```
Energy = -6119.4131576040
H -2.5744744 -5.5547380 3.0413380
C -2.8680623 -5.8947011 2.0486752
C -4.1171311 -5.5646612 1.5205912
H -4.8053758 -4.9625979 2.1143398
C -4.5011807 -5.9913519 0.2379323
H -5.4836775 -5.7157736 -0.1460779
C -3.6513230 -6.7603390 -0.5583747
H -3.9634974 -7.0816320 -1.5498775
C -2.3976162 -7.0936469 -0.0346466
C -2.0177070 -6.6667403 1.2537140
N -1.3164815 -7.8236045 -0.5293758
N -0.7328600 -7.1656647 1.4772936
C -1.2184941 -8.4697858 -1.8590099
C -1.2442598 -7.4296079 -2.9812674
H -2.2056063 -6.9007801 -3.0388657
H -0.4449800 -6.6904687 -2.8384981
H -1.0794429 -7.9313619 -3.9447744
C -2.2538671 -9.5853302 -2.0159139
H -3.2841716 -9.2037005 -2.0156284
H -2.0881535 -10.1007260 -2.9720958
H -2.1500365 -10.3210669 -1.2074206
C 0.0275019 -6.8375936 2.7097639
C 0.8058401 -5.5315463 2.5212606
H 1.5769841 -5.6531488 1.7479760
H 0.1417344 -4.7094750 2.2203802
H 1.2930635 -5.2503494 3.4656111
C 0.9112989 -7.9845553 3.1893614
H -0.7542587 -6.6816895 3.4689476
H 1.7522812 -8.1586030 2.5023444
H 1.3205157 -7.7217435 4.1752695
H 0.3500452 -8.9230224 3.2771208
C -0.3018674 -7.8631707 0.3859978
H -0.2174441 -8.9305087 -1.8393822
Pd 1.4592022 -8.8186897 0.0305970
Br 2.4129756 -6.7065872 -0.8826730
Br 0.4726205 -10.9652022 0.8371697
C 3.1941137 -9.7855324 -0.3933681
N 4.3239026 -9.2751872 -0.9422543
N 3.4863817 -11.0972645 -0.2150628
C 5.3018476 -10.2400910 -1.1088155
H 4.3582732 -8.2813080 -1.1879898
C 4.7653432 -11.4070564 -0.6429620
H 6.2746519 -10.0268243 -1.5337233
H 5.1816648 -12.4049222 -0.5845812
H 2.7772168 -11.7186999 0.1864646
```

HEP complex  $R_1=NH_2$   $R_2=H$

49

Energy = -6230.1057498840

|    |            |             |            |
|----|------------|-------------|------------|
| H  | -3.2568775 | -5.4018413  | 3.4030379  |
| C  | -3.4612966 | -5.6704242  | 2.3671831  |
| C  | -4.5844599 | -5.1685554  | 1.7085683  |
| H  | -5.2632003 | -4.5031559  | 2.2423944  |
| C  | -4.8530420 | -5.5015085  | 0.3702624  |
| H  | -5.7388369 | -5.0918285  | -0.1156892 |
| C  | -4.0085518 | -6.3446178  | -0.3531359 |
| H  | -4.2297535 | -6.5906213  | -1.3896623 |
| C  | -2.8805801 | -6.8502416  | 0.3020999  |
| C  | -2.6175967 | -6.5186369  | 1.6456873  |
| N  | -1.8417717 | -7.6929960  | -0.0933951 |
| N  | -1.4408545 | -7.1836470  | 1.9981752  |
| C  | -1.6618999 | -8.3039192  | -1.4297559 |
| C  | -1.4254497 | -7.2347100  | -2.4999782 |
| H  | -2.3019112 | -6.5880097  | -2.6444507 |
| H  | -0.5660548 | -6.6058133  | -2.2315354 |
| H  | -1.2082392 | -7.7227988  | -3.4602656 |
| C  | -2.7967278 | -9.2788987  | -1.7542486 |
| H  | -2.8802277 | -10.0422788 | -0.9690681 |
| H  | -2.5810779 | -9.7844917  | -2.7058451 |
| H  | -3.7660120 | -8.7726287  | -1.8584136 |
| C  | -0.8067911 | -6.9895972  | 3.3256847  |
| C  | 0.1490385  | -5.7926879  | 3.2859426  |
| H  | 0.9802153  | -5.9887621  | 2.5943470  |
| H  | -0.3671710 | -4.8810453  | 2.9544192  |
| H  | 0.5566175  | -5.6091089  | 4.2902031  |
| C  | -0.1462717 | -8.2563979  | 3.8596534  |
| H  | -1.6503884 | -6.7504991  | 3.9914488  |
| H  | 0.7310539  | -8.5297204  | 3.2537443  |
| H  | 0.1838383  | -8.0722581  | 4.8919569  |
| H  | -0.8342501 | -9.1110386  | 3.8517515  |
| C  | -0.9629786 | -7.8949146  | 0.9342023  |
| H  | -0.7317826 | -8.8836525  | -1.3114376 |
| Pd | 0.6877754  | -9.0833371  | 0.7557113  |
| Br | -0.7042705 | -11.0692509 | 1.3328565  |
| Br | 2.0504490  | -7.1105672  | 0.0928466  |
| C  | 2.3176534  | -10.2823290 | 0.5157405  |
| N  | 2.4654843  | -11.3509425 | -0.3193314 |
| N  | 3.5298594  | -10.2059132 | 1.1366003  |
| C  | 3.7229191  | -11.9241570 | -0.2199656 |
| C  | 4.4053064  | -11.1879815 | 0.7011433  |
| H  | 3.9957173  | -12.7894810 | -0.8094911 |
| H  | 5.4134997  | -11.2569179 | 1.0876020  |
| N  | 3.9220343  | -9.2328224  | 2.0792480  |
| H  | 3.3670690  | -9.3884011  | 2.9269530  |
| H  | 3.6211986  | -8.3255837  | 1.6876518  |
| N  | 1.4804001  | -11.8803539 | -1.1792316 |
| H  | 1.3089492  | -11.1800183 | -1.9078616 |
| H  | 0.6164671  | -11.9360274 | -0.6141929 |

HEP complex  $R_1=H$   $R_2=OH$

47

|          |                  |             |
|----------|------------------|-------------|
| Energy = | -6269.9287300310 |             |
| H        | -2.5858992       | -5.5107221  |
| C        | -2.8775642       | -5.9064775  |
| C        | -4.1608892       | -5.6910685  |
| H        | -4.8757184       | -5.1145382  |
| C        | -4.5481106       | -6.2066611  |
| H        | -5.5585482       | -6.0221818  |
| C        | -3.6676549       | -6.9536854  |
| H        | -3.9838311       | -7.3469815  |
| C        | -2.3799740       | -7.1733238  |
| C        | -1.9943332       | -6.6503581  |
| N        | -1.2653462       | -7.8564018  |
| N        | -0.6672463       | -7.0343062  |
| C        | -1.1595397       | -8.5692762  |
| C        | -1.2953454       | -7.6026254  |
| H        | -2.2940861       | -7.1479223  |
| H        | -0.5454203       | -6.8036187  |
| H        | -1.1231478       | -8.1486839  |
| C        | -2.1162293       | -9.7627215  |
| H        | -3.1708812       | -9.4539385  |
| H        | -1.9365221       | -10.3259839 |
| H        | -1.9452028       | -10.4363171 |
| C        | 0.0508171        | -6.7186270  |
| C        | 1.5322274        | -6.4234945  |
| H        | 2.0810372        | -7.3272570  |
| H        | 1.6891961        | -5.6575209  |
| H        | 1.9577135        | -6.0666215  |
| C        | -0.1890682       | -7.8178150  |
| H        | -0.4255132       | -5.7892121  |
| H        | 0.2662820        | -8.7623847  |
| H        | 0.2587229        | -7.5239138  |
| H        | -1.2627830       | -7.9888910  |
| C        | -0.2262119       | -7.7791291  |
| H        | -0.1272625       | -8.9547876  |
| Pd       | 1.5794966        | -8.6559256  |
| Br       | 2.2802995        | -6.6820571  |
| Br       | 0.8540781        | -10.6829570 |
| C        | 3.3740842        | -9.5369389  |
| N        | 4.4131721        | -9.0383032  |
| N        | 3.8015635        | -10.7650467 |
| C        | 5.4726366        | -9.9430862  |
| C        | 5.0742889        | -11.0366135 |
| O        | 6.6913581        | -9.6861930  |
| O        | 5.6821159        | -12.2092089 |
| H        | 4.3432316        | -8.1030150  |
| H        | 3.1866355        | -11.3648127 |
| H        | 6.6263437        | -9.7209377  |
| H        | 6.6033386        | -12.1637465 |

HEP complex  $R_1=H$   $R_2=NH_2$

49

Energy = -6230.1822188910

|    |            |             |            |
|----|------------|-------------|------------|
| H  | -2.2411995 | -6.1407456  | 3.0766126  |
| C  | -2.5362989 | -6.2488319  | 2.0331040  |
| C  | -3.6995811 | -5.6443682  | 1.5545883  |
| H  | -4.3184282 | -5.0639092  | 2.2389494  |
| C  | -4.0855648 | -5.7718871  | 0.2096358  |
| H  | -5.0005982 | -5.2862286  | -0.1325571 |
| C  | -3.3241409 | -6.5081179  | -0.6997339 |
| H  | -3.6355620 | -6.5978499  | -1.7380397 |
| C  | -2.1581760 | -7.1169286  | -0.2247038 |
| C  | -1.7742399 | -6.9880211  | 1.1253861  |
| N  | -1.1771199 | -7.9046769  | -0.8276200 |
| N  | -0.5874316 | -7.7089632  | 1.2736835  |
| C  | -1.1169453 | -8.3076337  | -2.2516015 |
| C  | -0.9240557 | -7.0912329  | -3.1607238 |
| H  | -1.7798604 | -6.4014190  | -3.1378553 |
| H  | -0.0216444 | -6.5407657  | -2.8643116 |
| H  | -0.7933472 | -7.4288724  | -4.1976328 |
| C  | -2.3010612 | -9.1981595  | -2.6338039 |
| H  | -3.2575127 | -8.6598221  | -2.5912712 |
| H  | -2.1632788 | -9.5589211  | -3.6625938 |
| H  | -2.3539428 | -10.0705655 | -1.9697057 |
| C  | 0.1660436  | -7.7218442  | 2.5535732  |
| C  | 1.1455913  | -6.5447702  | 2.6028760  |
| H  | 1.9118438  | -6.6510142  | 1.8219582  |
| H  | 0.6281513  | -5.5868940  | 2.4517736  |
| H  | 1.6412308  | -6.5165202  | 3.5838538  |
| C  | 0.8394973  | -9.0604384  | 2.8369970  |
| H  | -0.6105007 | -7.5719825  | 3.3196908  |
| H  | 1.6731282  | -9.2461752  | 2.1437784  |
| H  | 1.2391779  | -9.0408737  | 3.8613937  |
| H  | 0.1363284  | -9.8978144  | 2.7461482  |
| C  | -0.2174578 | -8.2589717  | 0.0799926  |
| H  | -0.2007847 | -8.9186719  | -2.2984133 |
| Pd | 1.4036103  | -9.3896199  | -0.4109135 |
| Br | 2.6867621  | -7.3205578  | -0.9494423 |
| Br | 0.0822804  | -11.4714446 | -0.0068815 |
| C  | 3.0104532  | -10.5123893 | -0.9467473 |
| N  | 3.1076648  | -11.8722627 | -0.9627619 |
| N  | 4.2164590  | -10.0919241 | -1.3749393 |
| C  | 4.3437254  | -12.2982078 | -1.4157277 |
| H  | 2.3072186  | -12.4379400 | -0.6627083 |
| C  | 5.0711595  | -11.1630759 | -1.6890995 |
| H  | 4.4038945  | -9.0882740  | -1.4581508 |
| N  | 6.3880445  | -11.0842748 | -2.1688448 |
| H  | 7.0517568  | -10.6905527 | -1.4996731 |
| H  | 6.4758556  | -10.5853782 | -3.0552263 |
| N  | 4.7275645  | -13.6355034 | -1.4448381 |
| H  | 4.0600852  | -14.2520167 | -1.9104755 |
| H  | 5.6519656  | -13.7317972 | -1.8660280 |

HEP complex  $R_1=H$   $R_2=CH_3$

51

```
Energy = -6198.0816498110
H -2.2868344 -6.2007818 3.1190727
C -2.5874494 -6.2962806 2.0761131
C -3.7675007 -5.7109637 1.6149791
H -4.3965421 -5.1536419 2.3095106
C -4.1577116 -5.8235878 0.2700090
H -5.0858619 -5.3546674 -0.0578688
C -3.3839996 -6.5232887 -0.6573857
H -3.6995711 -6.5974374 -1.6958619
C -2.2021100 -7.1154034 -0.1998026
C -1.8143869 -7.0014708 1.1505729
N -1.2078018 -7.8716893 -0.8205478
N -0.6118626 -7.6994148 1.2805443
C -1.1439932 -8.2474625 -2.2522789
C -0.9619595 -7.0115894 -3.1363559
H -1.8275191 -6.3362935 -3.0917220
H -0.0651430 -6.4539974 -2.8344056
H -0.8353822 -7.3266090 -4.1812671
C -2.3222265 -9.1371545 -2.6540485
H -3.2823868 -8.6039384 -2.6205892
H -2.1716564 -9.4896181 -3.6839823
H -2.3824387 -10.0154618 -1.9981466
C 0.1489513 -7.7116719 2.5555761
C 1.0779849 -6.4953571 2.6273799
H 1.8440397 -6.5586925 1.8414765
H 0.5211678 -5.5560682 2.5007972
H 1.5771638 -6.4672980 3.6060167
C 0.8825660 -9.0259410 2.8025751
H -0.6282790 -7.6143138 3.3293176
H 1.7192370 -9.1589926 2.1004387
H 1.2874427 -9.0132239 3.8245275
H 0.2160167 -9.8905247 2.6950119
C -0.2371344 -8.2224042 0.0762614
H -0.2239256 -8.8512275 -2.3097784
Pd 1.3961046 -9.3222966 -0.4453367
Br 2.6493322 -7.2264864 -0.9486924
Br 0.1035635 -11.4255539 -0.0572257
C 3.0038890 -10.4198154 -1.0248770
N 3.1283496 -11.7669247 -1.0595453
N 4.1976017 -9.9773867 -1.4846333
C 4.3718271 -12.1746604 -1.5346710
H 2.3391118 -12.3525357 -0.7707360
C 5.0625166 -11.0188958 -1.8093524
H 4.3654996 -8.9701619 -1.5628087
C 6.4333659 -10.7863470 -2.3438204
H 6.9339521 -11.7405056 -2.5486913
H 7.0587412 -10.2270797 -1.6308533
H 6.4086273 -10.2125619 -3.2829846
C 4.7516729 -13.6091255 -1.6628852
H 4.0417286 -14.1602363 -2.2982539
H 4.7785777 -14.1119219 -0.6837561
H 5.7470744 -13.7039167 -2.1140757
```

HEP complex  $R_1=F$   $R_2=H$

45

|          |                  |             |            |
|----------|------------------|-------------|------------|
| Energy = | -6317.8030514800 |             |            |
| H        | -2.6643294       | -5.7122209  | 2.9908203  |
| C        | -2.9177318       | -6.0272511  | 1.9791763  |
| C        | -4.1827479       | -5.7735237  | 1.4475383  |
| H        | -4.9218760       | -5.2501694  | 2.0545244  |
| C        | -4.5211652       | -6.1835283  | 0.1467871  |
| H        | -5.5183472       | -5.9712109  | -0.2393444 |
| C        | -3.6088425       | -6.8597546  | -0.6643828 |
| H        | -3.8876267       | -7.1705177  | -1.6690860 |
| C        | -2.3391082       | -7.1176207  | -0.1367784 |
| C        | -2.0028066       | -6.7012805  | 1.1667701  |
| N        | -1.2039075       | -7.7534221  | -0.6402475 |
| N        | -0.6823839       | -7.0982640  | 1.3869452  |
| C        | -1.0564643       | -8.3750258  | -1.9771428 |
| C        | -1.1620957       | -7.3308499  | -3.0902739 |
| H        | -2.1625394       | -6.8807439  | -3.1486717 |
| H        | -0.4230998       | -6.5333952  | -2.9370913 |
| H        | -0.9541203       | -7.8110766  | -4.0564501 |
| C        | -2.0050026       | -9.5651349  | -2.1395346 |
| H        | -3.0610456       | -9.2615072  | -2.1287282 |
| H        | -1.8076394       | -10.0571722 | -3.1021617 |
| H        | -1.8412373       | -10.2984736 | -1.3386834 |
| C        | -0.0278365       | -6.9116004  | 2.7070415  |
| C        | 1.4664496        | -6.6254488  | 2.6041734  |
| H        | 2.0216046        | -7.5150355  | 2.2728673  |
| H        | 1.6815282        | -5.8127609  | 1.8995414  |
| H        | 1.8352088        | -6.3418284  | 3.6003756  |
| C        | -0.3385016       | -8.1005583  | 3.6234656  |
| H        | -0.5108912       | -6.0102199  | 3.1138746  |
| H        | 0.1176979        | -9.0184484  | 3.2268145  |
| H        | 0.0645923        | -7.9087593  | 4.6280715  |
| H        | -1.4214286       | -8.2644161  | 3.7143089  |
| C        | -0.2005832       | -7.7457155  | 0.2868226  |
| H        | -0.0237358       | -8.7579787  | -1.9622328 |
| Pd       | 1.6009364        | -8.5911714  | -0.0382167 |
| Br       | 2.4193840        | -6.4890734  | -1.0863702 |
| Br       | 0.7499408        | -10.7387127 | 0.8703344  |
| C        | 3.3894445        | -9.4679633  | -0.4037210 |
| N        | 3.8392304        | -10.1171073 | -1.5014409 |
| N        | 4.4919228        | -9.5955166  | 0.3687885  |
| C        | 5.1200988        | -10.6190990 | -1.4368940 |
| F        | 3.0682331        | -10.2735619 | -2.6154263 |
| C        | 5.5566945        | -10.2700767 | -0.1858795 |
| H        | 5.5926761        | -11.1572452 | -2.2477539 |
| H        | 6.4924134        | -10.4376907 | 0.3305691  |
| F        | 4.5524482        | -9.0875689  | 1.6336117  |

HEP complex  $R_1=Cl$   $R_2=H$

45

|          |                  |             |            |
|----------|------------------|-------------|------------|
| Energy = | -7038.6258530280 |             |            |
| H        | -2.7513530       | -5.9172072  | 3.0954309  |
| C        | -2.9781147       | -6.1674718  | 2.0595587  |
| C        | -4.2046929       | -5.8172837  | 1.4936138  |
| H        | -4.9413636       | -5.2906309  | 2.1007581  |
| C        | -4.5048674       | -6.1279357  | 0.1564643  |
| H        | -5.4720209       | -5.8398149  | -0.2562388 |
| C        | -3.5900948       | -6.7964313  | -0.6580200 |
| H        | -3.8365768       | -7.0277884  | -1.6921669 |
| C        | -2.3586579       | -7.1497848  | -0.0961481 |
| C        | -2.0629160       | -6.8410778  | 1.2467486  |
| N        | -1.2326212       | -7.8026807  | -0.5962306 |
| N        | -0.7789522       | -7.3305732  | 1.4948057  |
| C        | -1.0551379       | -8.3296672  | -1.9688152 |
| C        | -1.0662758       | -7.2000962  | -3.0013225 |
| H        | -2.0451323       | -6.7066868  | -3.0733082 |
| H        | -0.3088215       | -6.4453236  | -2.7521751 |
| H        | -0.8265945       | -7.6126510  | -3.9911950 |
| C        | -2.0437581       | -9.4612068  | -2.2583915 |
| H        | -3.0875664       | -9.1186506  | -2.2452134 |
| H        | -1.8394182       | -9.8760987  | -3.2554020 |
| H        | -1.9254025       | -10.2658023 | -1.5200984 |
| C        | -0.0965817       | -7.1224409  | 2.7969064  |
| C        | 0.7761693        | -5.8650901  | 2.7505015  |
| H        | 1.5814212        | -5.9800557  | 2.0115259  |
| H        | 0.1845518        | -4.9803438  | 2.4766481  |
| H        | 1.2220067        | -5.6871619  | 3.7395221  |
| C        | 0.6633158        | -8.3591278  | 3.2663867  |
| H        | -0.9231365       | -6.9551902  | 3.5036286  |
| H        | 1.5310979        | -8.5630981  | 2.6238441  |
| H        | 1.0197888        | -8.1853539  | 4.2918774  |
| H        | 0.0277818        | -9.2535790  | 3.2578087  |
| C        | -0.2697692       | -7.9090767  | 0.3672339  |
| H        | -0.0415034       | -8.7601687  | -1.9414064 |
| Pd       | 1.5255894        | -8.7897222  | 0.0261993  |
| Br       | 2.5048760        | -6.6111606  | -0.6588047 |
| Br       | 0.5414723        | -11.0278738 | 0.4935792  |
| C        | 3.2939321        | -9.6833387  | -0.3623189 |
| N        | 3.7267098        | -10.2694509 | -1.5167175 |
| N        | 4.3753724        | -9.8788554  | 0.4479734  |
| C        | 5.0066101        | -10.8040846 | -1.4335912 |
| Cl       | 2.7928914        | -10.3433711 | -2.9302806 |
| C        | 5.4258424        | -10.5520066 | -0.1643527 |
| H        | 5.4877949        | -11.3014893 | -2.2651520 |
| H        | 6.3501133        | -10.7832895 | 0.3483190  |
| Cl       | 4.4419017        | -9.3486966  | 2.0577352  |

HEP complex  $R_1=CHO$   $R_2=H$

49



Energy = -6346.1607376510

|    |            |             |            |
|----|------------|-------------|------------|
| H  | -2.5328429 | -6.2556251  | 3.0494801  |
| C  | -2.7124360 | -6.4198154  | 1.9875565  |
| C  | -3.8740823 | -5.9439726  | 1.3792277  |
| H  | -4.6084379 | -5.4059918  | 1.9790427  |
| C  | -4.1119494 | -6.1421619  | 0.0084378  |
| H  | -5.0300323 | -5.7578346  | -0.4366339 |
| C  | -3.1973238 | -6.8194865  | -0.7984307 |
| H  | -3.3960691 | -6.9623393  | -1.8585725 |
| C  | -2.0298787 | -7.2980851  | -0.1936279 |
| C  | -1.7981488 | -7.1029497  | 1.1818065  |
| N  | -0.9207906 | -7.9956555  | -0.6735146 |
| N  | -0.5679535 | -7.6998507  | 1.4687701  |
| C  | -0.6884697 | -8.4188958  | -2.0739589 |
| C  | -0.5508235 | -7.2096160  | -3.0023217 |
| H  | -1.4851396 | -6.6379627  | -3.0856451 |
| H  | 0.2411608  | -6.5388216  | -2.6431820 |
| H  | -0.2786758 | -7.5551866  | -4.0090794 |
| C  | -1.7305006 | -9.4444972  | -2.5263575 |
| H  | -2.7413699 | -9.0178177  | -2.5752205 |
| H  | -1.4719622 | -9.8055891  | -3.5313824 |
| H  | -1.7443342 | -10.3044896 | -1.8437736 |
| C  | 0.0396040  | -7.6159187  | 2.8215077  |
| C  | 0.9330713  | -6.3758995  | 2.9302182  |
| H  | 1.7826073  | -6.4486682  | 2.2370761  |
| H  | 0.3747409  | -5.4606202  | 2.6889480  |
| H  | 1.3160725  | -6.2837595  | 3.9562180  |
| C  | 0.7448546  | -8.9016950  | 3.2385071  |
| H  | -0.8253379 | -7.4881352  | 3.4897161  |
| H  | 1.6434353  | -9.0855129  | 2.6317313  |
| H  | 1.0497491  | -8.8120401  | 4.2905461  |
| H  | 0.0920198  | -9.7767549  | 3.1302796  |
| C  | -0.0305963 | -8.2353744  | 0.3343488  |
| H  | 0.2912269  | -8.9196599  | -2.0227883 |
| Pd | 1.7350142  | -9.2189488  | 0.0415546  |
| Br | 2.8404767  | -7.0422095  | -0.4102074 |
| Br | 0.5543741  | -11.3826819 | 0.3742592  |
| C  | 3.4780063  | -10.1882362 | -0.2984013 |
| N  | 3.7692818  | -11.1123956 | -1.2716452 |
| N  | 4.6672491  | -10.0717130 | 0.3797952  |
| C  | 5.0995933  | -11.5541670 | -1.1962203 |
| C  | 2.8443639  | -11.5670011 | -2.2617159 |
| C  | 5.6629024  | -10.9021042 | -0.1581609 |
| H  | 5.4855654  | -12.2831442 | -1.8972045 |
| H  | 6.6576548  | -10.9285030 | 0.2679911  |
| C  | 4.8779055  | -9.2134226  | 1.5016910  |
| O  | 3.1690456  | -12.3595123 | -3.1116465 |
| O  | 5.9392275  | -9.1669927  | 2.0732001  |
| H  | 3.9700372  | -8.6311737  | 1.7411434  |
| H  | 1.8481745  | -11.1108112 | -2.1249918 |

HEP complex  $R_1=H$   $R_2=Cl$

45

```

Energy = -7038.7343369400
H -2.2385298 -6.0487307 3.0230852
C -2.5283829 -6.1888970 1.9823597
C -3.6874175 -5.5983615 1.4776495
H -4.3092444 -4.9931083 2.1378435
C -4.0651682 -5.7676625 0.1348150
H -4.9747944 -5.2895125 -0.2293926
C -3.3001565 -6.5336776 -0.7459368
H -3.6063893 -6.6534524 -1.7831410
C -2.1380172 -7.1299312 -0.2446217
C -1.7627330 -6.9574086 1.1025597
N -1.1550198 -7.9380946 -0.8162687
N -0.5772995 -7.6752169 1.2813535
C -1.0913733 -8.3883189 -2.2270969
C -0.9055417 -7.2007999 -3.1747036
H -1.7714454 -6.5244878 -3.1739509
H -0.0118632 -6.6264039 -2.8970941
H -0.7708360 -7.5710200 -4.2001195
C -2.2732035 -9.2944307 -2.5786134
H -3.2336534 -8.7612351 -2.5489011
H -2.1373485 -9.6843726 -3.5969494
H -2.3214267 -10.1481403 -1.8893136
C 0.1663645 -7.6508403 2.5672578
C 1.1643752 -6.4885004 2.5826414
H 1.9365581 -6.6338956 1.8146962
H 0.6658916 -5.5276645 2.3927214
H 1.6509419 -6.4332635 3.5665151
C 0.8154384 -8.9886594 2.9068422
H -0.6146277 -7.4606369 3.3188151
H 1.6467933 -9.2181875 2.2240509
H 1.2159814 -8.9332069 3.9291511
H 0.0983812 -9.8173285 2.8511076
C -0.2040780 -8.2647482 0.1086794
H -0.1725060 -8.9958700 -2.2551000
Pd 1.4142737 -9.4144003 -0.3341195
Br 2.7242605 -7.3825092 -0.9195748
Br 0.0930688 -11.4782982 0.1268952
C 3.0112426 -10.5638469 -0.8318798
N 3.0977825 -11.9175883 -0.8296349
N 4.2320897 -10.1519990 -1.2560178
C 4.3439107 -12.3524384 -1.2454528
H 2.2856830 -12.4811407 -0.5492034
C 5.0709096 -11.2207373 -1.5188608
H 4.4257030 -9.1479811 -1.3590245
Cl 6.6725101 -11.0483586 -2.0694550
Cl 4.7818057 -13.9925471 -1.3600428

```

HEP complex  $R_1=H$   $R_2=(C(=O)OH)$

51

```

Energy = -6496.7629607610
H -1.5762948 -6.1478090 2.8600711

```

|    |            |             |            |
|----|------------|-------------|------------|
| C  | -1.9425228 | -6.2589432  | 1.8401030  |
| C  | -3.0333649 | -5.5169637  | 1.3867716  |
| H  | -3.5262821 | -4.8212337  | 2.0661654  |
| C  | -3.5064228 | -5.6488989  | 0.0702754  |
| H  | -4.3616119 | -5.0547322  | -0.2530602 |
| C  | -2.9046586 | -6.5217719  | -0.8368270 |
| H  | -3.2834980 | -6.6110258  | -1.8527568 |
| C  | -1.8081091 | -7.2660325  | -0.3891778 |
| C  | -1.3435697 | -7.1379953  | 0.9349469  |
| N  | -0.9759396 | -8.2064447  | -0.9980461 |
| N  | -0.2647555 | -8.0159284  | 1.0669276  |
| C  | -1.0464861 | -8.6740120  | -2.4027251 |
| C  | -0.7781925 | -7.5288876  | -3.3817147 |
| H  | -1.5641153 | -6.7613123  | -3.3546973 |
| H  | 0.1861069  | -7.0514057  | -3.1624059 |
| H  | -0.7376180 | -7.9297592  | -4.4037182 |
| C  | -2.3455897 | -9.4373230  | -2.6700002 |
| H  | -3.2339646 | -8.7988923  | -2.5684515 |
| H  | -2.3301015 | -9.8297091  | -3.6960749 |
| H  | -2.4394482 | -10.2860181 | -1.9798795 |
| C  | 0.5249238  | -8.0990609  | 2.3224073  |
| C  | 1.6605018  | -7.0700295  | 2.3083798  |
| H  | 2.3901419  | -7.3134777  | 1.5240266  |
| H  | 1.2803997  | -6.0557060  | 2.1229770  |
| H  | 2.1725106  | -7.0710953  | 3.2809765  |
| C  | 1.0128111  | -9.5117683  | 2.6268606  |
| H  | -0.1972375 | -7.8216765  | 3.1051895  |
| H  | 1.7845720  | -9.8329565  | 1.9109910  |
| H  | 1.4542286  | -9.5215527  | 3.6334766  |
| H  | 0.1948276  | -10.2427956 | 2.5919099  |
| C  | -0.0381173 | -8.6580894  | -0.1148263 |
| H  | -0.2091425 | -9.3869418  | -2.4720834 |
| Pd | 1.3717234  | -10.0369123 | -0.6125165 |
| Br | 2.9429530  | -8.2113098  | -1.2246875 |
| Br | -0.2556998 | -11.8707056 | -0.1536746 |
| C  | 2.7591827  | -11.4107539 | -1.1409195 |
| N  | 2.6454518  | -12.7596371 | -1.1140850 |
| N  | 4.0221482  | -11.2076392 | -1.6012207 |
| C  | 3.7954712  | -13.3940639 | -1.5439505 |
| H  | 1.7703703  | -13.2074832 | -0.8086533 |
| C  | 4.6947753  | -12.3773847 | -1.8621727 |
| H  | 4.4034774  | -10.2619318 | -1.7348580 |
| C  | 6.0940517  | -12.2624944 | -2.3767531 |
| C  | 3.8219048  | -14.8556980 | -1.5672707 |
| O  | 6.5826652  | -11.1624523 | -2.5386051 |
| O  | 2.8978986  | -15.5657154 | -1.2312254 |
| O  | 6.7743057  | -13.3888475 | -2.6482528 |
| H  | 6.2292026  | -14.1915940 | -2.4568026 |
| O  | 5.0195140  | -15.3683939 | -2.0158007 |
| H  | 4.9411729  | -16.3450143 | -1.9971120 |

(NHC-1) Ni(CO)<sub>3</sub> complex R<sub>1</sub>=H R<sub>2</sub>=H

16

Energy = -2075.200647802

|    |            |            |            |
|----|------------|------------|------------|
| Ni | -5.5054077 | 1.9588268  | -0.3608720 |
| C  | -6.4398316 | 3.4222845  | 0.1141820  |
| C  | -3.7282748 | 2.2756738  | -0.3372353 |
| C  | -5.9476551 | 0.5547042  | 0.6785103  |
| O  | -7.0426706 | 4.3552605  | 0.4408594  |
| O  | -2.5905616 | 2.4797859  | -0.3094740 |
| O  | -6.2474596 | -0.3435733 | 1.3427334  |
| N  | -6.7833196 | 2.1706084  | -3.0914737 |
| C  | -6.0204633 | 1.4786546  | -2.1950262 |
| C  | -6.9592852 | 1.4959883  | -4.2931939 |
| N  | -5.7247853 | 0.3422582  | -2.8924444 |
| C  | -6.2805590 | 0.3230881  | -4.1653705 |
| H  | -5.1599047 | -0.3969199 | -2.4907034 |
| H  | -7.1723073 | 3.0796564  | -2.8697648 |
| H  | -7.5373574 | 1.8938120  | -5.1175637 |
| H  | -6.1531574 | -0.5010486 | -4.8556332 |

(NHC-1) Ni(CO)<sub>3</sub> complex R<sub>1</sub>=NH<sub>2</sub> R<sub>2</sub>=H

20

Energy = -2185.893637670

|    |            |            |            |
|----|------------|------------|------------|
| O  | -6.4200715 | -0.5094037 | 1.2148652  |
| C  | -6.2611481 | 0.3769256  | -4.3668928 |
| C  | -6.8336486 | 1.6020653  | -4.5087824 |
| N  | -5.8221344 | 0.3101229  | -3.0544979 |
| C  | -6.1033049 | 0.3793216  | 0.5427862  |
| N  | -6.7092346 | 2.2342086  | -3.2705831 |
| C  | -6.0816525 | 1.4497746  | -2.3368641 |
| Ni | -5.5964808 | 1.7871849  | -0.4577058 |
| C  | -6.4677124 | 3.2800651  | 0.0809405  |
| O  | -7.0036816 | 4.2203128  | 0.4837378  |
| C  | -3.8173671 | 2.0447398  | -0.3543720 |
| O  | -2.6780318 | 2.2234493  | -0.2573191 |
| H  | -6.1188517 | -0.4432378 | -5.0590531 |
| H  | -7.3055692 | 2.0779193  | -5.3597447 |
| N  | -5.1490810 | -0.8295948 | -2.5702390 |
| H  | -5.7712926 | -1.2897942 | -1.8962434 |
| H  | -4.3556591 | -0.4822710 | -2.0199447 |
| N  | -7.1531532 | 3.5330869  | -2.9788176 |
| H  | -8.1591221 | 3.5914323  | -3.1544074 |
| H  | -6.6690029 | 4.1980226  | -3.5870426 |

(NHC-1) Ni(CO)<sub>3</sub> complex R<sub>1</sub>=H R<sub>2</sub>=OH

18

Energy = -2225.715898949

|    |            |           |            |
|----|------------|-----------|------------|
| Ni | -5.5397875 | 1.9132470 | -0.3897736 |
| C  | -6.4654936 | 3.3671702 | 0.1296959  |
| C  | -3.7605004 | 2.2177848 | -0.3723690 |

|   |            |            |            |
|---|------------|------------|------------|
| C | -5.9643114 | 0.4729719  | 0.6055053  |
| O | -7.0615472 | 4.2984914  | 0.4729763  |
| O | -2.6205006 | 2.4095992  | -0.3547633 |
| O | -6.2366517 | -0.4506664 | 1.2471468  |
| N | -6.7626308 | 2.2970806  | -3.1246841 |
| C | -6.0555332 | 1.5163835  | -2.2450535 |
| C | -6.9476427 | 1.6881793  | -4.3535796 |
| N | -5.8052173 | 0.3988694  | -2.9816893 |
| C | -6.3490450 | 0.4645024  | -4.2715656 |
| H | -5.2637740 | -0.3807211 | -2.6251050 |
| H | -7.1056480 | 3.2210214  | -2.8855895 |
| O | -7.6189977 | 2.3281752  | -5.3404347 |
| H | -7.5307707 | 1.8090138  | -6.1609911 |
| O | -6.1622830 | -0.4800397 | -5.2401487 |
| H | -6.7978253 | -1.2120928 | -5.1248675 |

(NHC-1) Ni(CO)<sub>3</sub> complex R<sub>1</sub>=H R<sub>2</sub>= NH<sub>2</sub>

20

Energy = -2185.967803575

|    |            |            |            |
|----|------------|------------|------------|
| Ni | -5.4867623 | 1.9417288  | -0.3924088 |
| C  | -6.4161836 | 3.3978655  | 0.1114157  |
| C  | -3.7161910 | 2.2847668  | -0.4447362 |
| C  | -5.8687192 | 0.5218013  | 0.6460103  |
| O  | -7.0141541 | 4.3337487  | 0.4395571  |
| O  | -2.5823260 | 2.5122713  | -0.4714595 |
| O  | -6.1243225 | -0.3902992 | 1.3118555  |
| N  | -6.7773840 | 2.2223871  | -3.1073697 |
| C  | -6.0675080 | 1.4879688  | -2.2176811 |
| C  | -7.0323869 | 1.5506906  | -4.3152633 |
| N  | -5.8592139 | 0.3200387  | -2.9078220 |
| C  | -6.4304580 | 0.3249237  | -4.1751837 |
| H  | -5.3090206 | -0.4417689 | -2.5269639 |
| H  | -7.1073700 | 3.1621979  | -2.9156266 |
| N  | -6.2617819 | -0.7387620 | -5.0638588 |
| H  | -6.6411864 | -0.5287129 | -5.9861546 |
| H  | -6.6495190 | -1.6230051 | -4.7309693 |
| N  | -7.7826277 | 2.1509419  | -5.3371401 |
| H  | -7.2487732 | 2.4414445  | -6.1553794 |
| H  | -8.6128417 | 1.6318723  | -5.6189418 |

(NHC-1) Ni(CO)<sub>3</sub> complex R<sub>1</sub>=H R<sub>2</sub>= CH<sub>3</sub>

22

Energy = -2153.869627763

|    |            |            |            |
|----|------------|------------|------------|
| Ni | -5.5340918 | 1.9435904  | -0.3787452 |
| C  | -6.4550484 | 3.4128386  | 0.1014767  |
| C  | -3.7581297 | 2.2585187  | -0.3553386 |
| C  | -5.9678696 | 0.5412324  | 0.6661051  |
| O  | -7.0395505 | 4.3564792  | 0.4324333  |
| O  | -2.6203265 | 2.4652377  | -0.3259520 |
| O  | -6.2507715 | -0.3525720 | 1.3445496  |

|   |            |            |            |
|---|------------|------------|------------|
| N | -6.8133943 | 2.1718527  | -3.1091972 |
| C | -6.0437271 | 1.4790497  | -2.2231192 |
| C | -6.9695678 | 1.5259057  | -4.3389102 |
| N | -5.7189369 | 0.3685830  | -2.9437865 |
| C | -6.2616798 | 0.3593025  | -4.2318361 |
| C | -6.0399679 | -0.7587081 | -5.1902442 |
| H | -6.5587571 | -0.5625689 | -6.1364974 |
| H | -6.4191348 | -1.7139160 | -4.7952971 |
| H | -4.9714337 | -0.8945493 | -5.4188198 |
| C | -7.7733465 | 2.1030920  | -5.4516212 |
| H | -8.8257226 | 2.2463617  | -5.1610057 |
| H | -7.7577858 | 1.4391482  | -6.3242015 |
| H | -7.3813150 | 3.0810766  | -5.7711010 |
| H | -5.1377381 | -0.3666653 | -2.5575546 |
| H | -7.2241146 | 3.0680307  | -2.8728370 |

*(NHC-1) Ni(CO)<sub>3</sub> complex R<sub>1</sub>=F R<sub>2</sub>=H*

16

Energy = -2273.609084243

|    |            |            |            |
|----|------------|------------|------------|
| O  | -6.1699608 | -0.3811133 | 1.3593080  |
| C  | -6.3305194 | 0.3644652  | -4.2197823 |
| C  | -6.9609074 | 1.5741651  | -4.3498966 |
| N  | -5.8182908 | 0.3903417  | -2.9414272 |
| C  | -5.9268791 | 0.5108787  | 0.6681956  |
| N  | -6.7574221 | 2.1911594  | -3.1354113 |
| C  | -6.0499234 | 1.5048911  | -2.2028535 |
| Ni | -5.5249815 | 1.9381814  | -0.3668725 |
| C  | -6.4353043 | 3.4064387  | 0.1738600  |
| O  | -6.9870902 | 4.3352291  | 0.5803715  |
| C  | -3.7431209 | 2.2424021  | -0.3358605 |
| O  | -2.6069744 | 2.4380435  | -0.2784219 |
| H  | -6.2124971 | -0.4697115 | -4.8989314 |
| H  | -7.5095841 | 2.0241087  | -5.1669539 |
| F  | -5.1083082 | -0.6701675 | -2.4439158 |
| F  | -7.2563363 | 3.4431275  | -2.8931281 |

*(NHC-1) Ni(CO)<sub>3</sub> complex R<sub>1</sub>=Cl R<sub>2</sub>=H*

16

Energy = -2994.429574073

|    |            |            |            |
|----|------------|------------|------------|
| O  | -6.2304872 | -0.3242503 | 1.2940568  |
| C  | -6.3318164 | 0.3508820  | -4.2781821 |
| C  | -7.0778813 | 1.4809183  | -4.3948774 |
| N  | -5.7685351 | 0.4085199  | -3.0092225 |
| C  | -5.9789405 | 0.5624094  | 0.5979399  |
| N  | -6.9225628 | 2.1557871  | -3.1888574 |
| C  | -6.1090062 | 1.5228565  | -2.2767000 |
| Ni | -5.5749321 | 1.9782279  | -0.4492293 |
| C  | -6.4358484 | 3.4435788  | 0.1692137  |
| O  | -6.9365716 | 4.3655344  | 0.6532109  |
| C  | -3.7939740 | 2.2802136  | -0.4287451 |

|    |            |            |            |
|----|------------|------------|------------|
| O  | -2.6574819 | 2.4785415  | -0.3767442 |
| H  | -6.1579527 | -0.4695879 | -4.9616556 |
| H  | -7.6915503 | 1.8554174  | -5.2037084 |
| Cl | -7.6799565 | 3.6474180  | -2.9009926 |
| Cl | -4.7338630 | -0.8080165 | -2.4317767 |

(NHC-1) Ni(CO)<sub>3</sub> complex R<sub>1</sub>=CHO R<sub>2</sub>= H

20

Energy = -2301.937413669

|    |            |            |            |
|----|------------|------------|------------|
| O  | -5.5841783 | -0.4409322 | 1.3866854  |
| C  | -6.5096073 | 0.2840335  | -4.1574104 |
| C  | -5.0706487 | -0.8425438 | -2.5324334 |
| C  | -7.0635440 | 1.4983920  | -4.3066451 |
| N  | -5.8535729 | 0.2845253  | -2.9119593 |
| C  | -5.5569341 | 0.4392203  | 0.6427681  |
| N  | -6.7442455 | 2.2381888  | -3.1521128 |
| C  | -6.0073515 | 1.4936176  | -2.2255634 |
| C  | -7.1012875 | 3.6146799  | -3.0815557 |
| Ni | -5.5360351 | 1.9293526  | -0.4049412 |
| C  | -6.7359852 | 3.0961313  | 0.3160584  |
| O  | -7.4648354 | 3.7984593  | 0.8677046  |
| C  | -3.8940366 | 2.6713014  | -0.2750773 |
| O  | -2.8458974 | 3.1448073  | -0.1914966 |
| O  | -4.3490107 | -0.9157682 | -1.5739590 |
| H  | -5.2069961 | -1.6630113 | -3.2718143 |
| O  | -6.7634378 | 4.3932516  | -2.2301657 |
| H  | -7.7379630 | 3.8848051  | -3.9531061 |
| H  | -6.5000861 | -0.5783610 | -4.8137380 |
| H  | -7.6402066 | 1.9211507  | -5.1211780 |

(NHC-1) Ni(CO)<sub>3</sub> complex R<sub>1</sub>=H R<sub>2</sub>= Cl

16

Energy = -2994.521311480

|    |            |            |            |
|----|------------|------------|------------|
| Ni | -5.5087148 | 1.9580134  | -0.3479457 |
| C  | -6.4296566 | 3.4315083  | 0.1317628  |
| C  | -3.7303836 | 2.2780369  | -0.3269145 |
| C  | -5.9262234 | 0.5504806  | 0.7013175  |
| O  | -7.0134599 | 4.3771624  | 0.4528786  |
| O  | -2.5946741 | 2.4868968  | -0.2951433 |
| O  | -6.1948639 | -0.3494449 | 1.3749307  |
| N  | -6.7940880 | 2.2054769  | -3.0626018 |
| C  | -6.0377851 | 1.4908700  | -2.1758281 |
| C  | -6.9816499 | 1.5437649  | -4.2705360 |
| N  | -5.7567676 | 0.3540023  | -2.8820094 |
| C  | -6.3163448 | 0.3550239  | -4.1543557 |
| H  | -5.2024263 | -0.4061817 | -2.5026483 |
| H  | -7.1755022 | 3.1205883  | -2.8470867 |
| Cl | -7.8833489 | 2.1827632  | -5.5627250 |
| Cl | -6.1429908 | -0.9257313 | -5.2594051 |

(NHC-1) Ni(CO)<sub>3</sub> complex R<sub>1</sub>=H R<sub>2</sub>= COOH

22

Energy = -2452.535879252

|    |            |            |            |
|----|------------|------------|------------|
| Ni | -5.5540205 | 1.9527903  | -0.4094673 |
| C  | -6.5406536 | 3.3979205  | 0.0400561  |
| C  | -3.7995535 | 2.3857410  | -0.4692930 |
| C  | -5.8195549 | 0.6110495  | 0.7725279  |
| O  | -7.1592248 | 4.3217545  | 0.3546243  |
| O  | -2.6807277 | 2.6673029  | -0.4950546 |
| O  | -5.9837323 | -0.2281695 | 1.5482052  |
| N  | -6.8504023 | 2.0226848  | -3.1170170 |
| C  | -6.1064155 | 1.3598462  | -2.1781256 |
| C  | -7.0582386 | 1.2948584  | -4.2750094 |
| N  | -5.8458954 | 0.1781407  | -2.8182815 |
| C  | -6.3896959 | 0.0948515  | -4.0855454 |
| H  | -7.2132388 | 2.9637283  | -2.9852814 |
| H  | -5.2928662 | -0.5793182 | -2.4225482 |
| C  | -7.8117874 | 1.8966973  | -5.3896751 |
| C  | -6.0973356 | -1.1230386 | -4.8842567 |
| O  | -7.9253738 | 3.0910847  | -5.5313446 |
| O  | -5.5989243 | -2.0948869 | -4.3567034 |
| O  | -8.3641562 | 1.0215956  | -6.3022293 |
| H  | -8.5666431 | 0.1658737  | -5.8711903 |
| O  | -6.3862890 | -1.1195023 | -6.2095718 |
| H  | -6.6893405 | -0.2379344 | -6.5182191 |

(NHC-1) R<sub>2</sub>=H R<sub>1</sub>=H

9

Energy = -226.0168640933

|   |            |            |            |
|---|------------|------------|------------|
| C | -5.3903825 | 0.9058243  | 0.0000000  |
| C | -4.0203917 | 0.9772736  | -0.0000000 |
| N | -3.5825313 | -0.3476368 | 0.0000000  |
| N | -5.6881349 | -0.4572446 | 0.0000000  |
| C | -4.5894703 | -1.2849257 | -0.0000000 |
| H | -3.3476241 | 1.8429933  | 0.0000000  |
| H | -6.1494378 | 1.6970061  | -0.0000000 |
| H | -2.5982499 | -0.6206636 | -0.0000000 |
| H | -6.6387775 | -0.8309665 | 0.0000000  |

(NHC-1) R<sub>2</sub>=NH<sub>2</sub> R<sub>1</sub>=H

13

Energy = -337.0267915719

|   |            |            |            |
|---|------------|------------|------------|
| C | -4.0328824 | 1.2881369  | -0.0000000 |
| C | -4.5765005 | -0.9844150 | 0.0000000  |
| C | -5.3990674 | 1.2024662  | -0.0000000 |
| N | -3.5834094 | -0.0400309 | 0.0000000  |
| N | -5.6792593 | -0.1711537 | 0.0000000  |



|   |            |            |            |
|---|------------|------------|------------|
| H | -2.6056595 | -0.3012606 | -0.0000000 |
| H | -6.6168154 | -0.5525165 | 0.0000000  |
| N | -6.3915204 | 2.1781627  | -0.0000000 |
| H | -6.1645313 | 3.1590573  | 0.0000000  |
| H | -7.3663899 | 1.9257858  | -0.0000000 |
| N | -3.1699030 | 2.3800224  | 0.0000000  |
| H | -2.1711691 | 2.2510484  | -0.0000000 |
| H | -3.5173623 | 3.3248970  | 0.0000000  |

(NHC-1)  $R_2=H$   $R_1=OH$

11

Energy = -376.6784763955

|   |            |            |            |
|---|------------|------------|------------|
| C | -3.9338590 | 0.7924341  | 0.0000000  |
| C | -4.5672424 | -1.4386336 | -0.0000000 |
| C | -5.3072557 | 0.7592653  | 0.0000000  |
| N | -3.5591505 | -0.5381254 | 0.0000000  |
| N | -5.6175508 | -0.5877041 | -0.0000000 |
| H | -6.0340023 | 1.5648318  | -0.0000000 |
| H | -3.2466571 | 1.6319105  | 0.0000000  |
| O | -6.9217861 | -1.1016887 | 0.0000000  |
| H | -7.4992785 | -0.3134539 | 0.0000000  |
| O | -2.2317502 | -0.9889497 | 0.0000000  |
| H | -1.6926274 | -0.1739963 | -0.0000000 |

(NHC-1)  $R_2=H$   $R_1=NH_2$

13

Energy = -336.9832255856

|   |            |            |            |
|---|------------|------------|------------|
| C | -4.0506882 | 0.9038931  | 0.0004888  |
| C | -4.8116020 | -1.2824456 | 0.0312469  |
| C | -5.4128912 | 0.9531341  | 0.0168281  |
| N | -3.7302432 | -0.4485642 | 0.0029604  |
| N | -5.8302902 | -0.3723201 | 0.0419319  |
| H | -6.1089011 | 1.7827737  | 0.0110560  |
| H | -3.2963395 | 1.6806461  | -0.0101627 |
| N | -7.2086246 | -0.7013394 | 0.0597981  |
| H | -7.4020307 | -1.1340419 | 0.9690720  |
| H | -7.3334756 | -1.4425311 | -0.6363492 |
| N | -2.3793101 | -0.8760669 | -0.0073830 |
| H | -2.2189858 | -1.3410606 | -0.9070581 |
| H | -2.3075479 | -1.6100472 | 0.7037107  |

(NHC-1)  $R_2=H$   $R_1=CH_3$

15

Energy = -304.9255260297

|   |            |            |            |
|---|------------|------------|------------|
| C | -5.4846405 | 0.8167670  | 0.0000020  |
| C | -4.1234729 | 0.8845498  | -0.0000015 |
| N | -3.6750430 | -0.4328800 | -0.0000020 |
| N | -5.7995189 | -0.5388414 | 0.0000034  |

|   |            |            |            |
|---|------------|------------|------------|
| C | -4.6942888 | -1.3491540 | 0.0000010  |
| H | -6.2308673 | 1.6035884  | 0.0000039  |
| H | -3.4592197 | 1.7415327  | -0.0000040 |
| C | -2.2704884 | -0.8221794 | -0.0000058 |
| H | -1.6436558 | 0.0778795  | -0.0000065 |
| H | -2.0430146 | -1.4199886 | -0.8914672 |
| H | -2.0430104 | -1.4199900 | 0.8914535  |
| C | -7.1582196 | -1.0666146 | 0.0000075  |
| H | -7.8722734 | -0.2338428 | 0.0000084  |
| H | -7.3242310 | -1.6842473 | 0.8914510  |
| H | -7.3242357 | -1.6842494 | -0.8914336 |

(NHC-1)  $R_2=F$   $R_1=H$

9

Energy = -424.8362714725

|   |            |            |            |
|---|------------|------------|------------|
| C | -5.4545629 | 0.9573938  | -0.0000000 |
| C | -4.1010472 | 1.0776831  | 0.0000000  |
| N | -3.6024578 | -0.2134386 | 0.0000000  |
| N | -5.7165478 | -0.4018036 | 0.0000000  |
| C | -4.5819354 | -1.1792507 | -0.0000000 |
| H | -2.6140720 | -0.4388415 | -0.0000000 |
| H | -6.6493778 | -0.7988326 | 0.0000000  |
| F | -6.4100450 | 1.8903056  | -0.0000000 |
| F | -3.3258940 | 2.1642044  | 0.0000000  |

(NHC-1)  $R_2=Cl$   $R_1=H$

9

Energy = -1145.607235801

|    |            |            |            |
|----|------------|------------|------------|
| C  | -4.0875907 | 1.0010623  | 0.0000000  |
| C  | -4.5847696 | -1.2591073 | 0.0000000  |
| C  | -5.4505810 | 0.8867594  | -0.0000000 |
| N  | -3.6035704 | -0.3023018 | -0.0000000 |
| N  | -5.7110081 | -0.4785841 | 0.0000000  |
| H  | -2.6158091 | -0.5315172 | 0.0000000  |
| H  | -6.6467728 | -0.8691415 | -0.0000000 |
| Cl | -6.6553103 | 2.0963408  | 0.0000000  |
| Cl | -3.1005378 | 2.3941795  | -0.0000000 |

(NHC-1)  $R_2=CHO$   $R_1=H$

13

Energy = -453.0495984467

|   |            |            |            |
|---|------------|------------|------------|
| C | -5.6444890 | 1.1812996  | 0.0000000  |
| C | -4.2783065 | 1.4421812  | -0.0000000 |
| N | -3.6738653 | 0.1996180  | -0.0000000 |
| N | -5.7482311 | -0.1967940 | -0.0000000 |
| C | -4.5461125 | -0.8618228 | -0.0000000 |
| H | -2.6628778 | 0.0911682  | 0.0000000  |
| H | -6.6478782 | -0.6707852 | -0.0000000 |

|   |            |           |            |
|---|------------|-----------|------------|
| C | -3.5300944 | 2.6940414 | -0.0000000 |
| C | -6.8008911 | 2.0698279 | 0.0000000  |
| O | -7.9510927 | 1.6514117 | -0.0000000 |
| H | -6.5763904 | 3.1617261 | 0.0000000  |
| O | -2.3066841 | 2.7280712 | -0.0000000 |
| H | -4.1404768 | 3.6266966 | -0.0000000 |

(NHC-1)  $R_2=H$   $R_1=Cl$

9  
Energy = -1145.520841177

|    |            |            |            |
|----|------------|------------|------------|
| C  | -3.9914838 | 0.8786771  | 0.0000000  |
| C  | -4.6403659 | -1.3629274 | 0.0000000  |
| C  | -5.3538392 | 0.8591609  | 0.0000000  |
| N  | -3.6193687 | -0.4642103 | -0.0000000 |
| N  | -5.6868967 | -0.4942311 | 0.0000000  |
| H  | -6.0846745 | 1.6581778  | -0.0000000 |
| H  | -3.2841128 | 1.6986733  | 0.0000000  |
| Cl | -7.3168020 | -1.0205026 | 0.0000000  |
| Cl | -1.9747664 | -0.9430477 | -0.0000000 |

(NHC-1)  $R_2=H$   $R_1=COOH$

15  
Energy = -603.6398998313

|   |            |            |            |
|---|------------|------------|------------|
| C | -4.0042393 | 0.5823930  | -0.0056233 |
| C | -4.5189700 | -1.6638545 | -0.0000800 |
| C | -5.3562201 | 0.4835123  | -0.0075028 |
| N | -3.5230097 | -0.7337075 | -0.0011269 |
| N | -5.6396125 | -0.8889938 | -0.0040736 |
| C | -6.9692378 | -1.4638256 | -0.0046140 |
| C | -2.1233198 | -1.1063307 | 0.0021717  |
| O | -1.2462773 | -0.2831960 | 0.0012722  |
| O | -7.9578303 | -0.7789165 | -0.0082164 |
| O | -6.9283964 | -2.7965224 | -0.0006894 |
| H | -5.9612067 | -3.0489637 | 0.0016585  |
| O | -1.9668529 | -2.4308826 | 0.0061473  |
| H | -2.8855272 | -2.8249414 | 0.0057405  |
| H | -6.1412586 | 1.2292087  | -0.0108681 |
| H | -3.3361714 | 1.4344507  | -0.0069656 |

carbene-phosphinidene adduct  $R_2=H$   $R_1=H$

21  
Energy = -799.4558273320

|   |            |           |            |
|---|------------|-----------|------------|
| C | -2.6026514 | 1.3070047 | 0.4904400  |
| C | -3.7088463 | 1.9726227 | -0.0470148 |
| C | -3.6336637 | 2.6212041 | -1.2965807 |
| C | -2.4019106 | 2.5904344 | -1.9787112 |
| H | -2.3214044 | 3.0923166 | -2.9451348 |
| C | -1.2915241 | 1.9330932 | -1.4394945 |

|   |            |            |            |
|---|------------|------------|------------|
| H | -0.3474747 | 1.9241072  | -1.9877345 |
| C | -1.3892798 | 1.2862884  | -0.2045108 |
| H | -0.5225583 | 0.7758481  | 0.2185461  |
| P | -5.0610259 | 3.5891175  | -1.9840142 |
| C | -7.6599885 | 1.0072466  | -3.5759103 |
| C | -6.7183324 | 0.1222772  | -3.1599738 |
| N | -5.7112971 | 0.8625166  | -2.5471404 |
| N | -7.2145608 | 2.2731707  | -3.2076874 |
| C | -5.9888783 | 2.2143805  | -2.5666105 |
| H | -6.6786583 | -0.9559099 | -3.2453997 |
| H | -8.5976786 | 0.8486361  | -4.0927611 |
| H | -4.8597303 | 0.5012136  | -2.1323532 |
| H | -7.6955058 | 3.1449846  | -3.3880015 |
| H | -2.6846575 | 0.8154423  | 1.4618469  |
| H | -4.6456730 | 2.0111848  | 0.5133602  |

*carbene-phosphinidene adduct R<sub>2</sub>=NH<sub>2</sub> R<sub>1</sub>=H*

25

Energy = -910.2229750647

|   |             |            |            |
|---|-------------|------------|------------|
| C | -2.7764081  | 1.2426315  | 0.3253673  |
| C | -3.7760601  | 1.8508365  | -0.4377241 |
| C | -3.4787961  | 2.5094746  | -1.6530053 |
| C | -2.1215749  | 2.5663751  | -2.0372175 |
| H | -1.8581897  | 3.0718968  | -2.9692153 |
| C | -1.1181772  | 1.9839007  | -1.2601369 |
| H | -0.0780039  | 2.0485263  | -1.5861280 |
| C | -1.4392911  | 1.3050684  | -0.0805486 |
| H | -0.6568623  | 0.8403446  | 0.5209434  |
| P | -4.7055811  | 3.4088836  | -2.6853073 |
| C | -7.9507329  | 1.1721001  | -3.4023663 |
| C | -7.1924595  | 0.2380057  | -2.7500251 |
| N | -6.0048564  | 0.8644731  | -2.3800865 |
| N | -7.2003517  | 2.3640344  | -3.3777433 |
| C | -5.9765133  | 2.1877498  | -2.7786569 |
| H | -5.2423057  | 0.4407838  | -1.8605116 |
| H | -7.4927547  | 3.2235644  | -3.8272817 |
| H | -3.0412712  | 0.7403557  | 1.2583160  |
| H | -4.8031354  | 1.8521567  | -0.0638897 |
| N | -7.4661778  | -1.0747899 | -2.3538300 |
| H | -6.8390642  | -1.7693530 | -2.7652122 |
| H | -8.4313098  | -1.3338229 | -2.5526464 |
| N | -9.2123588  | 1.1362875  | -4.0147993 |
| H | -9.3286035  | 0.3946644  | -4.7025678 |
| H | -10.0077606 | 1.1585720  | -3.3768571 |

*carbene-phosphinidene adduct R<sub>2</sub>=H R<sub>1</sub>=OH*

23

Energy = -949.8672611161

|   |            |            |            |
|---|------------|------------|------------|
| C | -3.0305690 | 1.1480513  | 0.1740048  |
| C | -3.9601031 | 1.6101672  | -0.7667362 |
| C | -3.5489268 | 2.3358123  | -1.9120985 |
| C | -2.1670278 | 2.6022925  | -2.0444222 |
| H | -1.8151776 | 3.1545191  | -2.9187485 |
| C | -1.2490373 | 2.1625952  | -1.0929480 |
| H | -0.1892116 | 2.3880979  | -1.2260373 |
| C | -1.6704285 | 1.4189100  | 0.0172134  |
| H | -0.9475435 | 1.0639147  | 0.7522903  |
| P | -4.6548586 | 3.0084760  | -3.2063062 |
| C | -8.1520295 | 1.1113347  | -3.1732687 |
| C | -7.3697496 | 0.0156776  | -2.9099047 |
| N | -6.0646150 | 0.4629784  | -2.8947803 |
| N | -7.2844725 | 2.1686987  | -3.3128045 |
| C | -5.9719583 | 1.8152174  | -3.1287188 |
| H | -7.6164178 | -1.0299682 | -2.7847113 |
| H | -9.2213701 | 1.2145971  | -3.2992093 |
| H | -3.3815042 | 0.5915007  | 1.0452189  |
| H | -5.0262225 | 1.4731982  | -0.5660446 |
| O | -7.6641822 | 3.4900348  | -3.3682767 |
| H | -6.8161724 | 3.9470639  | -3.0537742 |
| O | -4.9885629 | -0.3798229 | -2.7578650 |
| H | -4.4176193 | 0.0534532  | -2.0633824 |

*carbene-phosphinidene adduct R<sub>2</sub>=H R<sub>1</sub>=NH<sub>2</sub>*

25

Energy = -910.1567149584

|   |            |            |            |
|---|------------|------------|------------|
| C | -2.0701340 | 2.0078381  | 0.7322889  |
| C | -3.3704274 | 2.3819997  | 0.3893374  |
| C | -3.8369487 | 2.2818150  | -0.9391710 |
| C | -2.9276031 | 1.8062782  | -1.9117982 |
| H | -3.2290899 | 1.7815578  | -2.9622504 |
| C | -1.6333294 | 1.4116310  | -1.5634020 |
| H | -0.9561596 | 1.0442353  | -2.3372730 |
| C | -1.1953403 | 1.5087185  | -0.2385427 |
| H | -0.1823470 | 1.2080004  | 0.0313443  |
| P | -5.5113595 | 2.9300843  | -1.3106036 |
| C | -7.3749789 | 1.0681870  | -4.2943467 |
| C | -6.6501790 | 0.0050966  | -3.8555929 |
| N | -5.8659934 | 0.4499132  | -2.7958671 |
| N | -7.0343869 | 2.1454778  | -3.4898906 |
| C | -6.0833931 | 1.7959490  | -2.5458756 |
| H | -6.6126825 | -1.0266705 | -4.1788357 |
| H | -8.0928754 | 1.1716320  | -5.0970163 |
| H | -1.7409032 | 2.0959616  | 1.7694301  |
| H | -4.0472775 | 2.7511152  | 1.1632943  |
| N | -7.5177990 | 3.4448840  | -3.6932160 |
| H | -6.7049482 | 4.0710052  | -3.5732244 |
| H | -8.1495724 | 3.6720792  | -2.9162452 |
| N | -5.1596856 | -0.4401252 | -1.9768408 |
| H | -5.4896813 | -0.2851963 | -1.0148451 |
| H | -4.1716747 | -0.1514571 | -1.9744178 |

*carbene-phosphinidene adduct R<sub>2</sub>=H R<sub>1</sub>=CH<sub>3</sub>*

27

Energy = -878.0991643687

|   |            |            |            |
|---|------------|------------|------------|
| C | -2.1751099 | 2.4846559  | 0.7030457  |
| C | -3.3966564 | 2.8836829  | 0.1581841  |
| C | -3.7914431 | 2.4817692  | -1.1368849 |
| C | -2.8934483 | 1.6697944  | -1.8644945 |
| H | -3.1404894 | 1.3836013  | -2.8894048 |
| C | -1.6803251 | 1.2548472  | -1.3116631 |
| H | -1.0081692 | 0.6258890  | -1.8996107 |
| C | -1.3111679 | 1.6590534  | -0.0239874 |
| H | -0.3585398 | 1.3421315  | 0.4025863  |
| P | -5.3290801 | 3.2023796  | -1.8266215 |
| C | -7.2938382 | 0.8552611  | -4.3598816 |
| C | -6.8152125 | -0.1219903 | -3.5444334 |
| N | -6.0362669 | 0.4884724  | -2.5703136 |
| N | -6.7854228 | 2.0598884  | -3.9012047 |
| C | -6.0000381 | 1.8593877  | -2.7753215 |
| H | -6.9615311 | -1.1946830 | -3.5718997 |
| H | -7.9375797 | 0.7953334  | -5.2285888 |
| H | -1.8999551 | 2.8135161  | 1.7072791  |
| H | -4.0679997 | 3.5151754  | 0.7449789  |
| C | -5.5340867 | -0.1793481 | -1.3834247 |
| H | -6.0666113 | -1.1305555 | -1.2645320 |
| H | -5.7205760 | 0.4651407  | -0.5126111 |
| H | -4.4524943 | -0.3626917 | -1.4452699 |
| C | -7.0268670 | 3.3611990  | -4.4931498 |
| H | -7.8429450 | 3.8916834  | -3.9804755 |
| H | -7.2837131 | 3.2344056  | -5.5520062 |
| H | -6.1106033 | 3.9616413  | -4.3873446 |

*carbene-phosphinidene adduct R<sub>2</sub>=F R<sub>1</sub>=H*

21

Energy = -998.0071389540

|   |            |           |            |
|---|------------|-----------|------------|
| C | -2.6368002 | 1.3268188 | 0.4907086  |
| C | -3.7301719 | 1.9981359 | -0.0636863 |
| C | -3.6387892 | 2.6163638 | -1.3272112 |
| C | -2.4077581 | 2.5505052 | -2.0075177 |
| H | -2.3150073 | 3.0298159 | -2.9841883 |
| C | -1.3104170 | 1.8867853 | -1.4499834 |
| H | -0.3653052 | 1.8505648 | -1.9947596 |
| C | -1.4225217 | 1.2707782 | -0.2007710 |
| H | -0.5658339 | 0.7551062 | 0.2358998  |
| P | -5.0432833 | 3.5939127 | -2.0384851 |
| C | -7.6784137 | 1.0502828 | -3.5643489 |
| C | -6.7560010 | 0.1597115 | -3.1363473 |
| N | -5.7798542 | 0.8685436 | -2.4417980 |
| N | -7.2804566 | 2.3119975 | -3.1284136 |
| C | -6.0353369 | 2.2309904 | -2.5074361 |

|   |            |            |            |
|---|------------|------------|------------|
| H | -4.8610314 | 0.5137983  | -2.1912756 |
| H | -7.6381395 | 3.1806420  | -3.5121507 |
| H | -2.7292031 | 0.8593272  | 1.4728802  |
| H | -4.6678178 | 2.0610649  | 0.4925411  |
| F | -6.7464533 | -1.1710051 | -3.1720216 |
| F | -8.8602543 | 0.8705400  | -4.1501654 |

*carbene-phosphinidene adduct R<sub>2</sub>=Cl R<sub>1</sub>=H*

21

Energy = -1718.777682076

|    |            |            |            |
|----|------------|------------|------------|
| C  | -2.6336941 | 1.3443183  | 0.4954697  |
| C  | -3.6986575 | 2.0450103  | -0.0782008 |
| C  | -3.5717452 | 2.6540601  | -1.3433390 |
| C  | -2.3314869 | 2.5528089  | -2.0019963 |
| H  | -2.2116163 | 3.0234476  | -2.9798955 |
| C  | -1.2615780 | 1.8623207  | -1.4243711 |
| H  | -0.3093332 | 1.7977744  | -1.9541684 |
| C  | -1.4106240 | 1.2522464  | -0.1760251 |
| H  | -0.5762207 | 0.7137224  | 0.2759031  |
| P  | -4.9413730 | 3.6564154  | -2.0899927 |
| C  | -7.7013475 | 1.1316279  | -3.4780387 |
| C  | -6.8067208 | 0.2225060  | -3.0009746 |
| N  | -5.7545829 | 0.9430503  | -2.4408028 |
| N  | -7.1859424 | 2.3951687  | -3.1982154 |
| C  | -5.9557862 | 2.3069023  | -2.5605855 |
| H  | -4.9217873 | 0.5489917  | -2.0146712 |
| H  | -7.6219993 | 3.2695753  | -3.4646630 |
| H  | -2.7550719 | 0.8825068  | 1.4772031  |
| H  | -4.6416415 | 2.1400276  | 0.4648224  |
| Cl | -6.8519263 | -1.4783021 | -3.0062821 |
| Cl | -9.1937351 | 0.9077411  | -4.2624161 |

*carbene-phosphinidene adduct R<sub>2</sub>=CHO R<sub>1</sub>=H*

25

Energy = -1026.223941844

|   |            |           |            |
|---|------------|-----------|------------|
| C | -2.7691901 | 1.3118357 | 0.4383359  |
| C | -3.7987933 | 1.9762747 | -0.2343778 |
| C | -3.5660634 | 2.6106352 | -1.4717384 |
| C | -2.2601335 | 2.5816945 | -1.9953316 |
| H | -2.0574740 | 3.0742179 | -2.9485234 |
| C | -1.2272232 | 1.9294500 | -1.3160884 |
| H | -0.2219246 | 1.9196403 | -1.7409257 |
| C | -1.4793656 | 1.2875305 | -0.1007808 |
| H | -0.6730342 | 0.7781465 | 0.4285849  |
| P | -4.8833799 | 3.5647522 | -2.3556261 |
| C | -7.5926468 | 1.0174436 | -3.7637933 |
| C | -6.7290734 | 0.1009478 | -3.1761496 |
| N | -5.7088723 | 0.8442617 | -2.6078834 |
| N | -7.0673896 | 2.2645246 | -3.5287472 |
| C | -5.8770753 | 2.2093160 | -2.8107964 |

|   |            |            |            |
|---|------------|------------|------------|
| H | -4.9119537 | 0.4799478  | -2.0916175 |
| H | -7.5120092 | 3.1160652  | -3.8621936 |
| H | -2.9715509 | 0.8290275  | 1.3961781  |
| H | -4.7943910 | 2.0252510  | 0.2131853  |
| C | -8.8411343 | 0.8445729  | -4.5035462 |
| C | -6.7798789 | -1.3574287 | -3.1045206 |
| O | -7.6505033 | -2.0522353 | -3.6103909 |
| H | -5.9332869 | -1.8154761 | -2.5330247 |
| O | -9.4556306 | 1.8152414  | -4.9386246 |
| H | -9.1821219 | -0.2011569 | -4.6386540 |

*carbene-phosphinidene adduct R<sub>2</sub>=H R<sub>1</sub>=Cl*

21

Energy = -1718.783405707

|    |            |            |            |
|----|------------|------------|------------|
| C  | -2.8990876 | 1.5879404  | 0.5951286  |
| C  | -3.7862382 | 1.8749986  | -0.4444444 |
| C  | -3.3004763 | 2.1396805  | -1.7372466 |
| C  | -1.9146060 | 2.1184425  | -1.9624304 |
| H  | -1.5231617 | 2.3175106  | -2.9604934 |
| C  | -1.0337016 | 1.8258382  | -0.9201661 |
| H  | 0.0395874  | 1.8000712  | -1.1142952 |
| C  | -1.5220533 | 1.5624393  | 0.3618804  |
| H  | -0.8323075 | 1.3332836  | 1.1753796  |
| P  | -4.4199920 | 2.7967639  | -3.0349130 |
| C  | -8.0160037 | 1.0638405  | -3.0737723 |
| C  | -7.2887670 | 0.1088738  | -2.3950092 |
| N  | -5.9830595 | 0.5035485  | -2.2585242 |
| N  | -7.1074235 | 2.0612699  | -3.3359376 |
| C  | -5.8656643 | 1.6970842  | -2.8357210 |
| H  | -7.6376928 | -0.8401866 | -1.9991853 |
| H  | -9.0500378 | 1.1409090  | -3.3868655 |
| H  | -3.2913636 | 1.3721965  | 1.5900803  |
| H  | -4.8585596 | 1.8718216  | -0.2505289 |
| Cl | -7.4924120 | 3.4915042  | -4.1931898 |
| Cl | -3.5786711 | 1.9819522  | -4.7940924 |

*carbene-phosphinidene adduct R<sub>2</sub>=H R<sub>1</sub>=COOH*

27

Energy = -1176.789455396

|   |            |           |            |
|---|------------|-----------|------------|
| C | -1.8051178 | 2.0338265 | 0.6482750  |
| C | -3.0703531 | 2.5288740 | 0.3221595  |
| C | -3.5990341 | 2.3695243 | -0.9726373 |
| C | -2.8068272 | 1.7191263 | -1.9394299 |
| H | -3.1746892 | 1.6164157 | -2.9621815 |
| C | -1.5468996 | 1.2180280 | -1.6112891 |
| H | -0.9496482 | 0.7163096 | -2.3746310 |
| C | -1.0404900 | 1.3721663 | -0.3155982 |
| H | -0.0510142 | 0.9876690 | -0.0641157 |
| P | -5.1511000 | 3.2682973 | -1.3599279 |
| C | -7.4218508 | 1.4040817 | -4.0535008 |



|   |            |            |            |
|---|------------|------------|------------|
| C | -6.6751507 | 0.3563384  | -3.6795696 |
| N | -5.9004827 | 0.7457302  | -2.5625955 |
| N | -7.1191206 | 2.4888954  | -3.2088021 |
| C | -6.0612399 | 2.1343328  | -2.3156121 |
| H | -1.4149692 | 2.1690311  | 1.6586898  |
| H | -3.6604126 | 3.0476003  | 1.0812296  |
| H | -8.1641941 | 1.5184690  | -4.8318575 |
| H | -6.6307541 | -0.6619015 | -4.0419775 |
| C | -7.7744762 | 3.7062046  | -3.3979461 |
| C | -5.4053464 | -0.2706999 | -1.7260767 |
| O | -5.1947093 | -1.3981553 | -2.1307950 |
| O | -8.5713445 | 3.9017849  | -4.2979999 |
| O | -5.2631000 | 0.1335256  | -0.4480129 |
| H | -4.8678372 | -0.6254825 | 0.0265498  |
| O | -7.4193937 | 4.6137051  | -2.4607157 |
| H | -7.8999744 | 5.4357332  | -2.6876214 |

*carbene-phosphinidene adduct  $R_2=H$   $R_1=C(CH_3)_3$*

45

Energy = -1114.0424742960

|   |            |            |            |
|---|------------|------------|------------|
| C | -2.8879702 | 2.2969828  | 0.6456225  |
| C | -3.7762425 | 2.4098549  | -0.4229843 |
| C | -3.3166622 | 2.5966313  | -1.7480807 |
| C | -1.9192875 | 2.6932729  | -1.9363873 |
| H | -1.5296157 | 2.8453872  | -2.9460647 |
| C | -1.0303647 | 2.5992743  | -0.8628599 |
| H | 0.0436478  | 2.6792985  | -1.0442444 |
| C | -1.5060380 | 2.3919374  | 0.4352945  |
| H | -0.8124158 | 2.3108770  | 1.2732723  |
| P | -4.4109858 | 2.9738150  | -3.1650658 |
| C | -7.9289639 | 1.0818220  | -2.8574884 |
| C | -7.1245797 | 0.0079037  | -2.6720333 |
| N | -5.8061100 | 0.4260615  | -2.7807669 |
| N | -7.1237213 | 2.1910248  | -3.0413786 |
| C | -5.7780291 | 1.8160921  | -2.9595899 |
| H | -7.4043664 | -1.0181769 | -2.4872782 |
| H | -9.0075255 | 1.1248173  | -2.8662474 |
| C | -4.6866599 | -0.5958895 | -2.8847790 |
| C | -7.6779039 | 3.5852255  | -3.2192206 |
| H | -3.2769863 | 2.1476061  | 1.6554804  |
| H | -4.8506594 | 2.3638677  | -0.2323960 |
| C | -9.2116283 | 3.5154273  | -3.2908399 |
| C | -7.1650760 | 4.1735214  | -4.5442837 |
| C | -7.2814125 | 4.4563726  | -2.0141816 |
| C | -5.2854856 | -1.9291657 | -3.3816913 |

|   |            |            |            |
|---|------------|------------|------------|
| C | -4.0595225 | -0.8294772 | -1.5027689 |
| C | -3.6321361 | -0.1682042 | -3.9137162 |
| H | -9.5629298 | 2.8993693  | -4.1310928 |
| H | -9.5845096 | 4.5353960  | -3.4510844 |
| H | -9.6586928 | 3.1460650  | -2.3574745 |
| H | -6.1889271 | 4.5151994  | -1.9232836 |
| H | -7.7018092 | 4.0433179  | -1.0860710 |
| H | -7.6814594 | 5.4704111  | -2.1533754 |
| H | -3.3171296 | -1.6375353 | -1.5752602 |
| H | -4.8243792 | -1.1350319 | -0.7741179 |
| H | -3.5568401 | 0.0668663  | -1.1271456 |
| H | -4.0831395 | -0.0156426 | -4.9037329 |
| H | -2.8911373 | -0.9767943 | -3.9898460 |
| H | -3.1193932 | 0.7559701  | -3.6333570 |
| H | -5.8523223 | -1.8016161 | -4.3141696 |
| H | -5.9287875 | -2.4131487 | -2.6341995 |
| H | -4.4539002 | -2.6172252 | -3.5800918 |
| H | -7.4550669 | 3.5347995  | -5.3909745 |
| H | -6.0729664 | 4.2805274  | -4.5354872 |
| H | -7.6086791 | 5.1684424  | -4.6940686 |

carbene-phosphinidene adduct  $R_2=CH_3$   $R_1=C(CH_3)_3$

51

|          |                  |            |            |
|----------|------------------|------------|------------|
| Energy = | -1192.6849968550 |            |            |
| C        | -3.0533990       | 1.8079865  | 0.8059486  |
| C        | -3.9002527       | 2.0891209  | -0.2644385 |
| C        | -3.3918697       | 2.5120573  | -1.5136485 |
| C        | -1.9926502       | 2.6602920  | -1.6248256 |
| H        | -1.5685431       | 2.9953864  | -2.5746845 |
| C        | -1.1430769       | 2.3950797  | -0.5464179 |
| H        | -0.0650343       | 2.5233886  | -0.6646265 |
| C        | -1.6658609       | 1.9598923  | 0.6735418  |
| H        | -1.0045470       | 1.7487141  | 1.5151903  |
| P        | -4.4367167       | 3.1470726  | -2.8847717 |
| C        | -7.8702096       | 1.1269272  | -2.6468677 |
| C        | -6.9961302       | 0.1153908  | -2.3661485 |
| N        | -5.6947784       | 0.5717922  | -2.6657029 |
| N        | -7.1268454       | 2.2342231  | -3.0914287 |
| C        | -5.7642439       | 1.9385845  | -2.9509818 |
| C        | -7.3345833       | -1.1829616 | -1.6929629 |
| C        | -9.3404695       | 1.0642613  | -2.3817314 |
| C        | -4.6017404       | -0.3865731 | -3.1460652 |
| C        | -7.6533342       | 3.5797460  | -3.5348212 |
| H        | -3.4772582       | 1.4842488  | 1.7591276  |
| H        | -4.9800136       | 1.9927608  | -0.1346146 |

|   |            |            |            |
|---|------------|------------|------------|
| C | -9.1039676 | 3.4866979  | -4.0435788 |
| C | -6.8266889 | 4.0708468  | -4.7382856 |
| C | -7.5858714 | 4.5661765  | -2.3551512 |
| C | -5.2746040 | -1.5279977 | -3.9438734 |
| C | -3.8138630 | -0.9595257 | -1.9561882 |
| C | -3.6256483 | 0.2840738  | -4.1212199 |
| H | -9.2243507 | 2.6873509  | -4.7880463 |
| H | -9.3366016 | 4.4382499  | -4.5402839 |
| H | -9.8399444 | 3.3528487  | -3.2452578 |
| H | -6.5535843 | 4.6662025  | -1.9946986 |
| H | -8.2234292 | 4.2230713  | -1.5275391 |
| H | -7.9450134 | 5.5543166  | -2.6766353 |
| H | -3.1044972 | -1.7161176 | -2.3215924 |
| H | -4.4671494 | -1.4440771 | -1.2189715 |
| H | -3.2479278 | -0.1735217 | -1.4444219 |
| H | -4.1456984 | 0.7070728  | -4.9906534 |
| H | -2.9361104 | -0.4956568 | -4.4749975 |
| H | -3.0368894 | 1.0811100  | -3.6596306 |
| H | -5.9336271 | -1.1250145 | -4.7256155 |
| H | -5.8514213 | -2.2151045 | -3.3174041 |
| H | -4.4893500 | -2.1185167 | -4.4338196 |
| H | -6.9087855 | 3.3613224  | -5.5745303 |
| H | -5.7654521 | 4.2103749  | -4.4981730 |
| H | -7.2252893 | 5.0401595  | -5.0678285 |
| H | -9.6942703 | 1.8922660  | -1.7509054 |
| H | -9.5537494 | 0.1311570  | -1.8463029 |
| H | -9.9502661 | 1.0549218  | -3.2950339 |
| H | -8.0722570 | -1.0118976 | -0.8956579 |
| H | -6.4564455 | -1.6302706 | -1.2167008 |
| H | -7.7621497 | -1.9323689 | -2.3764030 |

*carbene-phosphinidene adduct  $R_2=Br$   $R_1=C(CH_3)_3$*

45

|                           |            |           |            |
|---------------------------|------------|-----------|------------|
| Energy = -6261.7019558980 |            |           |            |
| C                         | -2.6053018 | 2.0326876 | 0.8350522  |
| C                         | -3.5812646 | 2.2520981 | -0.1360326 |
| C                         | -3.2424841 | 2.7752115 | -1.4013477 |
| C                         | -1.8886752 | 3.0882566 | -1.6411305 |
| H                         | -1.6019906 | 3.5084383 | -2.6081216 |
| C                         | -0.9119322 | 2.8785516 | -0.6633779 |
| H                         | 0.1284110  | 3.1327411 | -0.8753382 |
| C                         | -1.2641159 | 2.3440603 | 0.5774634  |
| H                         | -0.5041763 | 2.1777707 | 1.3424183  |
| P                         | -4.4721724 | 3.3626442 | -2.6340805 |

|    |            |            |            |
|----|------------|------------|------------|
| C  | -7.7421600 | 1.1961778  | -2.3193934 |
| C  | -6.8248617 | 0.2617704  | -1.9518746 |
| N  | -5.5462859 | 0.7295635  | -2.2791048 |
| N  | -7.0724618 | 2.2897748  | -2.8850147 |
| C  | -5.6928834 | 2.0843224  | -2.6605644 |
| Br | -7.1703610 | -1.1950736 | -0.7900112 |
| Br | -9.5290716 | 1.1753017  | -1.7205088 |
| C  | -4.5123482 | -0.2438958 | -2.8913044 |
| C  | -7.6703850 | 3.4633535  | -3.6350685 |
| H  | -2.8937338 | 1.6277329  | 1.8071086  |
| H  | -4.6240927 | 2.0254810  | 0.0900742  |
| C  | -9.0273707 | 3.0894056  | -4.2602333 |
| C  | -6.7518388 | 3.8323649  | -4.8128030 |
| C  | -7.8360877 | 4.6426049  | -2.6607031 |
| C  | -5.2822838 | -1.2841252 | -3.7307114 |
| C  | -3.7271527 | -0.9206561 | -1.7592932 |
| C  | -3.5441503 | 0.4645042  | -3.8412489 |
| H  | -8.9737368 | 2.1337227  | -4.7999917 |
| H  | -9.2828104 | 3.8711115  | -4.9880786 |
| H  | -9.8397076 | 3.0374590  | -3.5311378 |
| H  | -6.8695441 | 4.9300408  | -2.2259810 |
| H  | -8.5255651 | 4.3767338  | -1.8477713 |
| H  | -8.2509653 | 5.5097856  | -3.1939956 |
| H  | -3.0330013 | -1.6577980 | -2.1884354 |
| H  | -4.3920348 | -1.4464328 | -1.0633069 |
| H  | -3.1436001 | -0.1827001 | -1.1954272 |
| H  | -4.0663880 | 0.9651063  | -4.6659908 |
| H  | -2.8916023 | -0.3099059 | -4.2693553 |
| H  | -2.9078632 | 1.1972992  | -3.3364870 |
| H  | -5.8668944 | -0.7926350 | -4.5209253 |
| H  | -5.9567661 | -1.9029454 | -3.1286630 |
| H  | -4.5559571 | -1.9531659 | -4.2124004 |
| H  | -6.6505495 | 2.9852065  | -5.5064079 |
| H  | -5.7500650 | 4.1474383  | -4.4975331 |
| H  | -7.2100478 | 4.6686426  | -5.3579416 |

*carbene-phosphinidene adduct*  $R_2=F$   $R_1=C(CH_3)_3$

45

|          |                  |           |            |
|----------|------------------|-----------|------------|
| Energy = | -1312.5877038950 |           |            |
| C        | -2.7499474       | 2.2963026 | 0.7033574  |
| C        | -3.6607459       | 2.3839299 | -0.3487642 |
| C        | -3.2557636       | 2.8085981 | -1.6327695 |
| C        | -1.8979149       | 3.1593835 | -1.8026450 |
| H        | -1.5556565       | 3.4968381 | -2.7841059 |

|   |            |            |            |
|---|------------|------------|------------|
| C | -0.9891456 | 3.0841509  | -0.7444956 |
| H | 0.0534915  | 3.3636643  | -0.9089997 |
| C | -1.4062627 | 2.6449867  | 0.5145215  |
| H | -0.6978012 | 2.5807623  | 1.3414240  |
| P | -4.3870957 | 3.1953759  | -3.0212696 |
| C | -7.7420889 | 1.0995900  | -2.6188524 |
| C | -6.8612231 | 0.1689028  | -2.2047877 |
| N | -5.5672541 | 0.6294096  | -2.4242748 |
| N | -7.0411896 | 2.2145582  | -3.0769713 |
| C | -5.6694663 | 1.9645472  | -2.8687699 |
| F | -7.1358434 | -0.9853890 | -1.5809027 |
| F | -9.0690257 | 1.0404310  | -2.5039222 |
| C | -4.5005698 | -0.4189147 | -2.7995771 |
| C | -7.6473651 | 3.5103744  | -3.5782127 |
| H | -3.0940657 | 1.9673612  | 1.6862948  |
| H | -4.7080379 | 2.1342802  | -0.1698464 |
| C | -9.1368173 | 3.3285468  | -3.9209507 |
| C | -6.9345785 | 3.9131159  | -4.8801424 |
| C | -7.5098545 | 4.5837909  | -2.4846379 |
| C | -5.1641340 | -1.4341555 | -3.7561550 |
| C | -4.0300642 | -1.0996382 | -1.5051220 |
| C | -3.3009675 | 0.1773592  | -3.5364857 |
| H | -9.3016410 | 2.5014818  | -4.6246335 |
| H | -9.4680427 | 4.2539327  | -4.4106820 |
| H | -9.7649132 | 3.1766381  | -3.0369235 |
| H | -6.4570695 | 4.7399538  | -2.2167276 |
| H | -8.0716422 | 4.2914405  | -1.5861572 |
| H | -7.9232607 | 5.5328472  | -2.8534776 |
| H | -3.2713496 | -1.8566139 | -1.7479863 |
| H | -4.8548513 | -1.6007443 | -0.9836534 |
| H | -3.5772134 | -0.3638866 | -0.8278945 |
| H | -3.5993798 | 0.7420039  | -4.4279033 |
| H | -2.6760046 | -0.6693125 | -3.8554966 |
| H | -2.6923720 | 0.8279796  | -2.9036922 |
| H | -5.5334184 | -0.9298990 | -4.6604972 |
| H | -5.9908983 | -1.9849503 | -3.2933491 |
| H | -4.4091652 | -2.1690517 | -4.0657078 |
| H | -7.0651734 | 3.1362775  | -5.6471962 |
| H | -5.8613484 | 4.0865812  | -4.7326698 |
| H | -7.3811981 | 4.8451795  | -5.2532893 |

*carbene-phosphinidene adduct*  $R_2=Cl$   $R_1=C(CH_3)_3$

45

Energy = -2033.3460608250

|    |            |            |            |
|----|------------|------------|------------|
| C  | -2.6814472 | 2.1349945  | 0.8299153  |
| C  | -3.6304676 | 2.3194481  | -0.1745482 |
| C  | -3.2538213 | 2.7664367  | -1.4584358 |
| C  | -1.8883697 | 3.0389765  | -1.6821585 |
| H  | -1.5715127 | 3.3987218  | -2.6641508 |
| C  | -0.9383508 | 2.8651014  | -0.6716727 |
| H  | 0.1114434  | 3.0870138  | -0.8730336 |
| C  | -1.3285059 | 2.4065622  | 0.5880456  |
| H  | -0.5895655 | 2.2687342  | 1.3786724  |
| P  | -4.4423236 | 3.3087321  | -2.7506159 |
| C  | -7.7508903 | 1.1841736  | -2.3877143 |
| C  | -6.8441242 | 0.2534284  | -1.9885114 |
| N  | -5.5580997 | 0.7083882  | -2.3069742 |
| N  | -7.0670412 | 2.2693821  | -2.9528421 |
| C  | -5.6900106 | 2.0490427  | -2.7282229 |
| Cl | -7.1891016 | -1.0958927 | -0.9755980 |
| Cl | -9.4122533 | 1.1287144  | -1.9720353 |
| C  | -4.5161590 | -0.2939970 | -2.8509643 |
| C  | -7.6480017 | 3.4865317  | -3.6447866 |
| H  | -3.0004777 | 1.7900724  | 1.8154989  |
| H  | -4.6827921 | 2.1264090  | 0.0396792  |
| C  | -9.0569958 | 3.2069465  | -4.1989333 |
| C  | -6.7727969 | 3.8274130  | -4.8633014 |
| C  | -7.7037513 | 4.6509623  | -2.6401231 |
| C  | -5.2667747 | -1.3535923 | -3.6856798 |
| C  | -3.7817806 | -0.9411430 | -1.6680612 |
| C  | -3.5045224 | 0.3688632  | -3.7880488 |
| H  | -9.0943688 | 2.2694133  | -4.7702381 |
| H  | -9.3042491 | 4.0269120  | -4.8864974 |
| H  | -9.8275922 | 3.1815945  | -3.4238442 |
| H  | -6.7053415 | 4.8758908  | -2.2428279 |
| H  | -8.3730848 | 4.4049947  | -1.8041470 |
| H  | -8.0929198 | 5.5500001  | -3.1385434 |
| H  | -3.0826856 | -1.7013903 | -2.0450895 |
| H  | -4.4783584 | -1.4329396 | -0.9782336 |
| H  | -3.2087511 | -0.1903274 | -1.1102674 |
| H  | -3.9902804 | 0.8576952  | -4.6417103 |
| H  | -2.8559368 | -0.4305213 | -4.1739279 |
| H  | -2.8695089 | 1.1022602  | -3.2832730 |
| H  | -5.8135876 | -0.8818728 | -4.5140538 |
| H  | -5.9700914 | -1.9474754 | -3.0921872 |
| H  | -4.5298203 | -2.0443566 | -4.1172481 |
| H  | -6.7675723 | 2.9944790  | -5.5813245 |
| H  | -5.7360529 | 4.0649745  | -4.5951579 |
| H  | -7.1996344 | 4.7082552  | -5.3618282 |

carbene-phosphinidene adduct  $R_2=I$   $R_1=C(CH_3)_3$

45

|          |                  |            |            |
|----------|------------------|------------|------------|
| Energy = | -1708.5244725380 |            |            |
| C        | -2.6440102       | 2.0023660  | 0.8762738  |
| C        | -3.6087492       | 2.2651872  | -0.0951089 |
| C        | -3.2451249       | 2.7598593  | -1.3650404 |
| C        | -1.8788872       | 3.0034391  | -1.6100120 |
| H        | -1.5727371       | 3.4038365  | -2.5792920 |
| C        | -0.9122757       | 2.7493139  | -0.6322200 |
| H        | 0.1392727        | 2.9499217  | -0.8460369 |
| C        | -1.2894577       | 2.2420194  | 0.6128453  |
| H        | -0.5371012       | 2.0419588  | 1.3772043  |
| P        | -4.4656130       | 3.3904497  | -2.5863852 |
| C        | -7.7374398       | 1.2330110  | -2.2823662 |
| C        | -6.8163212       | 0.2844509  | -1.9383280 |
| N        | -5.5426908       | 0.7531443  | -2.2871974 |
| N        | -7.0646540       | 2.3210878  | -2.8584190 |
| C        | -5.6863979       | 2.1152049  | -2.6410157 |
| I        | -7.1698019       | -1.2973820 | -0.5835496 |
| I        | -9.6817043       | 1.2675075  | -1.4905913 |
| C        | -4.5034902       | -0.2000194 | -2.9201795 |
| C        | -7.6612026       | 3.4661742  | -3.6526243 |
| H        | -2.9509984       | 1.6200257  | 1.8516315  |
| H        | -4.6619535       | 2.0944563  | 0.1324063  |
| C        | -8.9715894       | 3.0275043  | -4.3325494 |
| C        | -6.7061066       | 3.8576088  | -4.7933808 |
| C        | -7.9058158       | 4.6565043  | -2.7089605 |
| C        | -5.2714972       | -1.2807402 | -3.7073022 |
| C        | -3.6468747       | -0.8330026 | -1.8152609 |
| C        | -3.6019585       | 0.5244439  | -3.9233523 |
| H        | -8.8472012       | 2.0712065  | -4.8598647 |
| H        | -9.2367782       | 3.7905201  | -5.0765455 |
| H        | -9.8109888       | 2.9382887  | -3.6376737 |
| H        | -6.9651061       | 4.9868703  | -2.2485442 |
| H        | -8.6125669       | 4.3843346  | -1.9134139 |
| H        | -8.3316584       | 5.4977820  | -3.2743739 |
| H        | -2.9695043       | -1.5758814 | -2.2612538 |
| H        | -4.2652510       | -1.3449234 | -1.0674107 |
| H        | -3.0410738       | -0.0742771 | -1.3063572 |
| H        | -4.1769682       | 0.9828486  | -4.7381732 |
| H        | -2.9316432       | -0.2299595 | -4.3594053 |
| H        | -2.9805798       | 1.2974261  | -3.4610497 |
| H        | -5.9219739       | -0.8256502 | -4.4673106 |
| H        | -5.8830627       | -1.9225143 | -3.0629747 |
| H        | -4.5430995       | -1.9218834 | -4.2226750 |

|   |            |           |            |
|---|------------|-----------|------------|
| H | -6.5198322 | 3.0034076 | -5.4596214 |
| H | -5.7421101 | 4.2394384 | -4.4378172 |
| H | -7.1837814 | 4.6526750 | -5.3817241 |

carbene-phosphinidene adduct  $R_2=NH_2$   $R_1=C(CH_3)_3$

49

|          |                  |            |            |
|----------|------------------|------------|------------|
| Energy = | -1224.7893897710 |            |            |
| C        | -2.9530873       | 2.3215145  | 0.6697380  |
| C        | -3.8071365       | 2.3583482  | -0.4318834 |
| C        | -3.3433569       | 2.7368600  | -1.7132559 |
| C        | -1.9755149       | 3.0843597  | -1.8213808 |
| H        | -1.5816604       | 3.3816311  | -2.7969615 |
| C        | -1.1245972       | 3.0629711  | -0.7144906 |
| H        | -0.0760409       | 3.3434912  | -0.8369419 |
| C        | -1.6032193       | 2.6753831  | 0.5407695  |
| H        | -0.9396689       | 2.6534985  | 1.4061899  |
| P        | -4.3952758       | 3.0563803  | -3.1751366 |
| C        | -7.8140292       | 1.0342004  | -2.5893366 |
| C        | -6.9059518       | 0.0941875  | -2.1948327 |
| N        | -5.6242145       | 0.5282971  | -2.5404766 |
| N        | -7.0884573       | 2.1290068  | -3.1148196 |
| C        | -5.7246466       | 1.8600552  | -2.9834538 |
| N        | -7.2346979       | -1.1436859 | -1.6129390 |
| N        | -9.1992318       | 0.8385235  | -2.6490557 |
| C        | -4.5265591       | -0.4865449 | -2.8707018 |
| C        | -7.6476666       | 3.4873050  | -3.4866233 |
| H        | -3.3481917       | 2.0313624  | 1.6462185  |
| H        | -4.8619351       | 2.1112100  | -0.2960877 |
| C        | -9.1698651       | 3.4538803  | -3.7080271 |
| C        | -7.0233042       | 3.9194694  | -4.8263569 |
| C        | -7.3541715       | 4.4902618  | -2.3544473 |
| C        | -5.1559625       | -1.5958513 | -3.7456665 |
| C        | -3.9385029       | -1.0569759 | -1.5662517 |
| C        | -3.3729414       | 0.0985241  | -3.6955280 |
| H        | -9.4759827       | 2.6937375  | -4.4346894 |
| H        | -9.4507368       | 4.4424705  | -4.0976568 |
| H        | -9.7341704       | 3.3038521  | -2.7797854 |
| H        | -6.2756989       | 4.5671288  | -2.1650539 |
| H        | -7.8642840       | 4.1826241  | -1.4298057 |
| H        | -7.7333177       | 5.4815680  | -2.6409323 |
| H        | -3.1152111       | -1.7418104 | -1.8121559 |
| H        | -4.6598994       | -1.6351308 | -0.9704879 |
| H        | -3.5406366       | -0.2501498 | -0.9375949 |
| H        | -3.7286533       | 0.6084780  | -4.5977140 |



|   |            |            |            |
|---|------------|------------|------------|
| H | -2.7458080 | -0.7527233 | -3.9999507 |
| H | -2.7508429 | 0.7963733  | -3.1294409 |
| H | -5.5191651 | -1.1669528 | -4.6903147 |
| H | -5.9876847 | -2.1178351 | -3.2601634 |
| H | -4.3814609 | -2.3358621 | -3.9860698 |
| H | -7.2756994 | 3.1955837  | -5.6144221 |
| H | -5.9319438 | 4.0135458  | -4.7661210 |
| H | -7.4329153 | 4.8988268  | -5.1116719 |
| H | -8.0678404 | -1.0452222 | -1.0297684 |
| H | -6.4821807 | -1.5250898 | -1.0425315 |
| H | -9.7597851 | 1.2886476  | -1.9262795 |
| H | -9.4513854 | -0.1436433 | -2.7434506 |

carbene-phosphinidene adduct  $R_2=NO_2$   $R_1=C(CH_3)_3$

49

|          |                  |            |            |
|----------|------------------|------------|------------|
| Energy = | -1523.2580807770 |            |            |
| C        | -2.6013122       | 2.0898130  | 0.8793201  |
| C        | -3.6085262       | 2.2724138  | -0.0661785 |
| C        | -3.2964215       | 2.6683139  | -1.3819449 |
| C        | -1.9469199       | 2.9042687  | -1.7067189 |
| H        | -1.6864729       | 3.2352831  | -2.7147250 |
| C        | -0.9381996       | 2.7234880  | -0.7563108 |
| H        | 0.1021818        | 2.9074628  | -1.0297084 |
| C        | -1.2612958       | 2.3110979  | 0.5379215  |
| H        | -0.4758189       | 2.1705028  | 1.2817894  |
| P        | -4.5684068       | 3.1792419  | -2.5996946 |
| C        | -7.7785047       | 0.9537032  | -2.3194438 |
| C        | -6.8570884       | 0.0386648  | -1.8731474 |
| N        | -5.5758419       | 0.5386817  | -2.1589092 |
| N        | -7.1459388       | 2.0629579  | -2.8032784 |
| C        | -5.7438642       | 1.8745091  | -2.5592168 |
| N        | -7.1676358       | -1.0370733 | -0.9948297 |
| N        | -9.2369045       | 0.8283122  | -2.1402091 |
| C        | -4.4888176       | -0.4083544 | -2.7610834 |
| C        | -7.7743562       | 3.3224807  | -3.4021096 |
| H        | -2.8626803       | 1.7782368  | 1.8920258  |
| H        | -4.6485632       | 2.1054411  | 0.2169108  |
| C        | -9.2205928       | 3.0724768  | -3.8572082 |
| C        | -6.9787650       | 3.7071834  | -4.6601102 |
| C        | -7.7652820       | 4.4329590  | -2.3367327 |
| C        | -5.2071432       | -1.6484814 | -3.3273363 |
| C        | -3.4824774       | -0.8225007 | -1.6807244 |
| C        | -3.7641927       | 0.2691778  | -3.9271219 |
| H        | -9.3026501       | 2.2144767  | -4.5356402 |

|   |            |            |            |
|---|------------|------------|------------|
| H | -9.5344834 | 3.9649402  | -4.4137312 |
| H | -9.9246463 | 2.9575164  | -3.0260759 |
| H | -6.7473966 | 4.6653459  | -2.0024686 |
| H | -8.3687290 | 4.1362878  | -1.4681286 |
| H | -8.2063577 | 5.3421698  | -2.7676255 |
| H | -2.7961371 | -1.5679818 | -2.1088854 |
| H | -3.9924777 | -1.2703702 | -0.8225243 |
| H | -2.8871730 | 0.0308682  | -1.3400213 |
| H | -4.4541027 | 0.5562663  | -4.7321439 |
| H | -3.0507320 | -0.4622123 | -4.3311525 |
| H | -3.1961336 | 1.1561267  | -3.6261502 |
| H | -5.9794419 | -1.3724377 | -4.0584802 |
| H | -5.6515563 | -2.2720371 | -2.5445848 |
| H | -4.4598548 | -2.2632928 | -3.8464436 |
| H | -7.0304645 | 2.9062344  | -5.4113049 |
| H | -5.9254246 | 3.9279845  | -4.4514306 |
| H | -7.4316206 | 4.6100081  | -5.0908537 |
| O | -6.2428535 | -1.5553915 | -0.3422057 |
| O | -8.3622198 | -1.3893048 | -0.9375068 |
| O | -9.8531810 | 0.2219214  | -3.0080856 |
| O | -9.7017833 | 1.3661713  | -1.1368719 |

*carbene-phosphinidene adduct  $R_2=H$   $R_1=C(CH_3)_3$*

*carbene-phosphinidene adduct  $R_2=OH$   $R_1=C(CH_3)_3$*

47

|          |                  |            |            |
|----------|------------------|------------|------------|
| Energy = | -1264.5462800350 |            |            |
| C        | -2.8492300       | 2.4076042  | 0.6027618  |
| C        | -3.7389995       | 2.3820225  | -0.4708896 |
| C        | -3.3346206       | 2.7592467  | -1.7720947 |
| C        | -1.9912917       | 3.1767981  | -1.9298870 |
| H        | -1.6421520       | 3.4728767  | -2.9225560 |
| C        | -1.1066312       | 3.2172981  | -0.8511924 |
| H        | -0.0777356       | 3.5466785  | -1.0120768 |
| C        | -1.5247306       | 2.8264074  | 0.4247486  |
| H        | -0.8328606       | 2.8504189  | 1.2675921  |
| P        | -4.4336185       | 2.9621908  | -3.2183702 |
| C        | -7.7947980       | 0.9175555  | -2.4585602 |
| C        | -6.8774978       | -0.0213881 | -2.1176025 |
| N        | -5.6102469       | 0.4273791  | -2.4613039 |
| N        | -7.1063612       | 2.0205329  | -2.9928494 |
| C        | -5.7297615       | 1.7530059  | -2.9119826 |
| O        | -7.1191492       | -1.2406061 | -1.5621241 |
| O        | -9.1368984       | 0.6416342  | -2.4658013 |
| C        | -4.4995816       | -0.5995222 | -2.7162987 |

|   |            |            |            |
|---|------------|------------|------------|
| C | -7.7077651 | 3.3757426  | -3.2996702 |
| H | -3.1975631 | 2.1107441  | 1.5946802  |
| H | -4.7728868 | 2.0785644  | -0.2949973 |
| C | -9.2436008 | 3.3040036  | -3.3824954 |
| C | -7.2098750 | 3.8318530  | -4.6823316 |
| C | -7.3373132 | 4.3747882  | -2.1882716 |
| C | -5.0855762 | -1.6934799 | -3.6392102 |
| C | -4.0571055 | -1.1810639 | -1.3635428 |
| C | -3.2809743 | -0.0239469 | -3.4427994 |
| H | -9.6002747 | 2.5331087  | -4.0758090 |
| H | -9.5912154 | 4.2788058  | -3.7490788 |
| H | -9.7169398 | 3.1701853  | -2.3960379 |
| H | -6.2473676 | 4.4743180  | -2.1013281 |
| H | -7.7490994 | 4.0457596  | -1.2228596 |
| H | -7.7656775 | 5.3586564  | -2.4275278 |
| H | -3.2772977 | -1.9359904 | -1.5371750 |
| H | -4.8857241 | -1.6619747 | -0.8308838 |
| H | -3.6321170 | -0.3918351 | -0.7292880 |
| H | -3.5524909 | 0.4704391  | -4.3825667 |
| H | -2.6278947 | -0.8785673 | -3.6737824 |
| H | -2.7125242 | 0.6829044  | -2.8331451 |
| H | -5.4199721 | -1.2513390 | -4.5885232 |
| H | -5.9190639 | -2.2362943 | -3.1829754 |
| H | -4.2935562 | -2.4191171 | -3.8664726 |
| H | -7.5142296 | 3.1133394  | -5.4568127 |
| H | -6.1180557 | 3.9395313  | -4.7036217 |
| H | -7.6547418 | 4.8091567  | -4.9191571 |
| H | -8.0910612 | -1.3152759 | -1.4872245 |
| H | -9.6304317 | 1.3187108  | -1.9678750 |

*carbene-phosphinidene adduct*  $R_2=SH$   $R_1=C(CH_3)_3$

47

|          |                  |           |            |
|----------|------------------|-----------|------------|
| Energy = | -1910.5303934520 |           |            |
| C        | -2.7082624       | 2.1039727 | 0.7904098  |
| C        | -3.6638119       | 2.2423690 | -0.2154542 |
| C        | -3.3105165       | 2.7094802 | -1.4996625 |
| C        | -1.9581162       | 3.0492485 | -1.7185941 |
| H        | -1.6569661       | 3.4225375 | -2.7005766 |
| C        | -1.0029161       | 2.9237495 | -0.7062742 |
| H        | 0.0348987        | 3.1977045 | -0.9062097 |
| C        | -1.3700250       | 2.4440970 | 0.5528231  |
| H        | -0.6260930       | 2.3423052 | 1.3442431  |
| P        | -4.5100348       | 3.1904695 | -2.8049773 |
| C        | -7.7869216       | 1.0199794 | -2.2374884 |

|   |            |            |            |
|---|------------|------------|------------|
| C | -6.8233133 | 0.1148836  | -1.8600719 |
| N | -5.5793645 | 0.5858688  | -2.2847769 |
| N | -7.1334395 | 2.1045305  | -2.8778713 |
| C | -5.7533134 | 1.9151713  | -2.7261230 |
| S | -7.0457393 | -1.3086262 | -0.8453990 |
| S | -9.4815636 | 0.7969686  | -1.8708889 |
| C | -4.5208668 | -0.4023078 | -2.8101025 |
| C | -7.7546078 | 3.3399861  | -3.4930562 |
| H | -3.0118826 | 1.7411498  | 1.7747091  |
| H | -4.7050247 | 1.9971939  | -0.0000467 |
| C | -9.1917654 | 3.0843786  | -3.9810733 |
| C | -6.9525797 | 3.7220335  | -4.7504560 |
| C | -7.7546113 | 4.4747097  | -2.4524333 |
| C | -5.2495186 | -1.4491922 | -3.6814485 |
| C | -3.8114965 | -1.0621447 | -1.6189381 |
| C | -3.4797899 | 0.2657151  | -3.7120148 |
| H | -9.2611041 | 2.1753995  | -4.5939011 |
| H | -9.4755538 | 3.9381038  | -4.6120284 |
| H | -9.9209407 | 3.0123797  | -3.1696616 |
| H | -6.7367274 | 4.6770706  | -2.0939042 |
| H | -8.3904947 | 4.2113204  | -1.5950352 |
| H | -8.1557581 | 5.3928948  | -2.9041514 |
| H | -3.0747841 | -1.7874082 | -1.9925267 |
| H | -4.5062026 | -1.6059790 | -0.9651332 |
| H | -3.2858338 | -0.3105322 | -1.0168472 |
| H | -3.9403505 | 0.7947291  | -4.5546577 |
| H | -2.8492125 | -0.5398947 | -4.1149479 |
| H | -2.8329634 | 0.9643191  | -3.1747976 |
| H | -5.7476018 | -0.9611623 | -4.5308546 |
| H | -5.9930048 | -2.0291200 | -3.1232150 |
| H | -4.5078038 | -2.1528085 | -4.0829978 |
| H | -6.9848633 | 2.9081152  | -5.4893019 |
| H | -5.9034187 | 3.9596431  | -4.5363042 |
| H | -7.4122424 | 4.6128441  | -5.1995624 |
| H | -8.3845927 | -1.0638378 | -0.7476963 |
| H | -9.6020549 | 1.6813915  | -0.8396433 |

*carbene-phosphinidene adduct*  $R_2=OCH_3$   $R_1=C(CH_3)_3$

53

|          |                  |           |            |
|----------|------------------|-----------|------------|
| Energy = | -1343.1641890680 |           |            |
| C        | -2.8723698       | 1.4655885 | 0.7367798  |
| C        | -3.7740885       | 1.7332123 | -0.2922039 |
| C        | -3.3852908       | 2.4586140 | -1.4401162 |
| C        | -2.0508044       | 2.9190879 | -1.4905511 |

|   |            |            |            |
|---|------------|------------|------------|
| H | -1.7197660 | 3.4888088  | -2.3625145 |
| C | -1.1510315 | 2.6655781  | -0.4516883 |
| H | -0.1274676 | 3.0394126  | -0.5223035 |
| C | -1.5518518 | 1.9301895  | 0.6663359  |
| H | -0.8501601 | 1.7261061  | 1.4761908  |
| P | -4.5279297 | 3.0861066  | -2.7309988 |
| C | -7.7151597 | 0.6900337  | -2.8580353 |
| C | -6.7493811 | -0.2305518 | -2.5931301 |
| N | -5.4877837 | 0.3796795  | -2.7421279 |
| N | -7.0842315 | 1.9225576  | -3.1339991 |
| C | -5.7043727 | 1.7541365  | -2.9291097 |
| O | -6.9226681 | -1.5394392 | -2.2674907 |
| O | -9.0517060 | 0.4744248  | -2.8866681 |
| C | -4.3555803 | -0.4527182 | -3.3748187 |
| C | -7.7479359 | 3.2297159  | -3.5017949 |
| H | -3.2053800 | 0.9047748  | 1.6130261  |
| H | -4.8067266 | 1.3910786  | -0.2019568 |
| C | -9.1836124 | 3.0160366  | -4.0163453 |
| C | -6.9661792 | 3.8662230  | -4.6658052 |
| C | -7.7790710 | 4.1538190  | -2.2701890 |
| C | -4.9735438 | -1.2926184 | -4.5148826 |
| C | -3.7367996 | -1.3562540 | -2.2987288 |
| C | -3.2548792 | 0.4066585  | -3.9992456 |
| H | -9.2276097 | 2.2697320  | -4.8199839 |
| H | -9.5216673 | 3.9780965  | -4.4255314 |
| H | -9.8887774 | 2.7281385  | -3.2306668 |
| H | -6.7650162 | 4.3360350  | -1.8904859 |
| H | -8.3850975 | 3.7108259  | -1.4666021 |
| H | -8.2321349 | 5.1168300  | -2.5456328 |
| H | -2.8973924 | -1.9155659 | -2.7362436 |
| H | -4.4581400 | -2.0876765 | -1.9161026 |
| H | -3.3495806 | -0.7566566 | -1.4647537 |
| H | -3.6460649 | 1.1073217  | -4.7461047 |
| H | -2.5633611 | -0.2847154 | -4.5025403 |
| H | -2.6857935 | 0.9749993  | -3.2582297 |
| H | -5.4114742 | -0.6380994 | -5.2817606 |
| H | -5.7415543 | -1.9872404 | -4.1578953 |
| H | -4.1772620 | -1.8825608 | -4.9898745 |
| H | -6.9786735 | 3.2026864  | -5.5421896 |
| H | -5.9230756 | 4.0862699  | -4.4061250 |
| H | -7.4519606 | 4.8122874  | -4.9426168 |
| C | -6.9208305 | -1.8259595 | -0.8503070 |
| C | -9.7528199 | 0.6755765  | -1.6423398 |
| H | -6.0045277 | -1.4526789 | -0.3704748 |
| H | -6.9692564 | -2.9176441 | -0.7610023 |
| H | -7.7989896 | -1.3769377 | -0.3615840 |

|   |             |            |            |
|---|-------------|------------|------------|
| H | -9.5396322  | 1.6678642  | -1.2158808 |
| H | -9.4786595  | -0.1014149 | -0.9131773 |
| H | -10.8207375 | 0.5943455  | -1.8769630 |

carbene-phosphinidene adduct  $R_2=COH$   $R_1=C(CH_3)_3$

49

|          |                  |            |            |
|----------|------------------|------------|------------|
| Energy = | -1340.7813571560 |            |            |
| C        | -2.9683868       | 1.9373449  | 0.7844345  |
| C        | -3.8421116       | 2.1454281  | -0.2819747 |
| C        | -3.3622667       | 2.5178954  | -1.5558479 |
| C        | -1.9720612       | 2.6973729  | -1.7052951 |
| H        | -1.5738951       | 3.0040642  | -2.6756743 |
| C        | -1.0966828       | 2.4983919  | -0.6337086 |
| H        | -0.0246354       | 2.6453066  | -0.7780074 |
| C        | -1.5889304       | 2.1118129  | 0.6148222  |
| H        | -0.9076140       | 1.9570750  | 1.4524846  |
| P        | -4.4560703       | 3.0700254  | -2.9244269 |
| C        | -7.8518287       | 1.0182023  | -2.8445652 |
| C        | -6.9815238       | 0.0270672  | -2.4249280 |
| N        | -5.6697984       | 0.4912382  | -2.6245074 |
| N        | -7.1170977       | 2.1280494  | -3.1852875 |
| C        | -5.7381762       | 1.8494442  | -2.9442154 |
| C        | -7.4306189       | -1.1862386 | -1.7786281 |
| C        | -9.3254945       | 0.7220730  | -2.9550245 |
| C        | -4.5651457       | -0.4898469 | -3.0440187 |
| C        | -7.6634103       | 3.5175407  | -3.4863726 |
| H        | -3.3663245       | 1.6502235  | 1.7596597  |
| H        | -4.9163852       | 2.0280789  | -0.1277131 |
| C        | -9.1650761       | 3.4750873  | -3.7840932 |
| C        | -6.9574579       | 4.0580915  | -4.7410808 |
| C        | -7.4574863       | 4.4226717  | -2.2546554 |
| C        | -5.2209784       | -1.6619303 | -3.8074743 |
| C        | -3.8306129       | -1.0148721 | -1.8010142 |
| C        | -3.5706269       | 0.1500395  | -4.0169296 |
| H        | -9.4112324       | 2.8378176  | -4.6405149 |
| H        | -9.4741393       | 4.5037082  | -4.0138921 |
| H        | -9.7582599       | 3.1507230  | -2.9177131 |
| H        | -6.3997766       | 4.5193353  | -1.9863886 |
| H        | -8.0130093       | 4.0259480  | -1.3927294 |
| H        | -7.8534980       | 5.4216522  | -2.4844469 |
| H        | -3.1070037       | -1.7844794 | -2.1039420 |
| H        | -4.5246702       | -1.4722166 | -1.0825189 |
| H        | -3.2882450       | -0.2110739 | -1.2910226 |
| H        | -4.0712951       | 0.5379499  | -4.9136222 |

|   |            |            |            |
|---|------------|------------|------------|
| H | -2.8698840 | -0.6370803 | -4.3281472 |
| H | -2.9893526 | 0.9610433  | -3.5686579 |
| H | -5.8225647 | -1.3016526 | -4.6529469 |
| H | -5.8553888 | -2.2935689 | -3.1745578 |
| H | -4.4219933 | -2.3020085 | -4.2038026 |
| H | -7.1478887 | 3.4013221  | -5.6011824 |
| H | -5.8737496 | 4.1594902  | -4.6031599 |
| H | -7.3613369 | 5.0535547  | -4.9719256 |
| O | -8.6096389 | -1.5547738 | -1.7943107 |
| H | -6.6658563 | -1.7633313 | -1.2129035 |
| O | -9.8910360 | 0.5993416  | -4.0250473 |
| H | -9.8497636 | 0.5829023  | -1.9856557 |

carbene-phosphinidene adduct  $R_2=\text{COOCH}_3$   $R_1=\text{C}(\text{CH}_3)_3$

57

|          |                  |            |            |
|----------|------------------|------------|------------|
| Energy = | -1569.9889924660 |            |            |
| C        | -2.5330510       | 2.1308912  | 0.7337108  |
| C        | -3.5323165       | 2.3275575  | -0.2171076 |
| C        | -3.2181716       | 2.7701100  | -1.5189507 |
| C        | -1.8671441       | 3.0355844  | -1.8174323 |
| H        | -1.6000229       | 3.3978698  | -2.8130526 |
| C        | -0.8657383       | 2.8482055  | -0.8598853 |
| H        | 0.1741788        | 3.0597788  | -1.1162475 |
| C        | -1.1929104       | 2.3892881  | 0.4177271  |
| H        | -0.4131141       | 2.2405097  | 1.1662626  |
| P        | -4.4940819       | 3.3012795  | -2.7277990 |
| C        | -7.6898962       | 0.9871530  | -2.3929221 |
| C        | -6.7199734       | 0.0503042  | -2.1073028 |
| N        | -5.4677578       | 0.6191076  | -2.4262616 |
| N        | -7.0756482       | 2.1496646  | -2.8142136 |
| C        | -5.6684375       | 1.9747362  | -2.7006271 |
| C        | -6.9070901       | -1.1508656 | -1.2919291 |
| C        | -9.1428049       | 0.8580056  | -1.9999165 |
| C        | -4.3363893       | -0.2480561 | -3.0193618 |
| C        | -7.7533820       | 3.4594900  | -3.1859490 |
| H        | -2.8007405       | 1.7834960  | 1.7334103  |
| H        | -4.5732280       | 2.1371469  | 0.0488452  |
| C        | -9.2335602       | 3.2472121  | -3.5378431 |
| C        | -7.0839075       | 4.0189169  | -4.4539046 |
| C        | -7.6608444       | 4.4299334  | -1.9940089 |
| C        | -4.9772245       | -1.4981337 | -3.6593829 |
| C        | -3.3420858       | -0.6754912 | -1.9299148 |
| C        | -3.6063451       | 0.4903477  | -4.1469000 |
| H        | -9.3700385       | 2.4860782  | -4.3185260 |

|   |             |            |            |
|---|-------------|------------|------------|
| H | -9.6048973  | 4.1963206  | -3.9464441 |
| H | -9.8577053  | 3.0080783  | -2.6711816 |
| H | -6.6171706  | 4.6320725  | -1.7247988 |
| H | -8.1848519  | 4.0126230  | -1.1234626 |
| H | -8.1422788  | 5.3799620  | -2.2662782 |
| H | -2.6146491  | -1.3736886 | -2.3703106 |
| H | -3.8603924  | -1.1820288 | -1.1087491 |
| H | -2.7919342  | 0.1832517  | -1.5328177 |
| H | -4.2907537  | 0.7800864  | -4.9562881 |
| H | -2.8589044  | -0.2027930 | -4.5577402 |
| H | -3.0835335  | 1.3897086  | -3.8062795 |
| H | -5.7448568  | -1.2239877 | -4.3962175 |
| H | -5.4097656  | -2.1781566 | -2.9181272 |
| H | -4.1872295  | -2.0507693 | -4.1849674 |
| H | -7.2188976  | 3.3281313  | -5.2988446 |
| H | -6.0117601  | 4.2090005  | -4.3236390 |
| H | -7.5642677  | 4.9730588  | -4.7107301 |
| C | -8.5409314  | -2.6629251 | -0.4654149 |
| C | -9.5114396  | -0.3792731 | -4.0563556 |
| O | -6.0645387  | -1.6871228 | -0.5882243 |
| O | -8.1951587  | -1.6072509 | -1.3887225 |
| H | -9.5945936  | -2.8853043 | -0.6614694 |
| H | -8.4054754  | -2.3252631 | 0.5702748  |
| H | -7.9155072  | -3.5475113 | -0.6412003 |
| O | -9.5440295  | 1.2915085  | -0.9415446 |
| O | -9.9982016  | 0.2443626  | -2.8484400 |
| H | -10.4069703 | -0.5994124 | -4.6467936 |
| H | -8.9800433  | -1.3071214 | -3.8106127 |
| H | -8.8522961  | 0.2926633  | -4.6226776 |

*carbene-phosphinidene adduct*  $R_2=C_6H_5$   $R_1=C(CH_3)_3$

65

|          |                  |             |            |
|----------|------------------|-------------|------------|
| Energy = | -1576.2863340590 |             |            |
| C        | 3.0404112        | -9.1246408  | -0.6934301 |
| N        | 3.0944389        | -10.1563019 | -1.6223509 |
| N        | 3.7974028        | -9.5422172  | 0.3945274  |
| C        | 3.8393256        | -11.2190087 | -1.0911405 |
| C        | 2.4668113        | -10.2379536 | -3.0287977 |
| C        | 4.2724763        | -10.8393159 | 0.1559261  |
| C        | 4.1218582        | -12.5713733 | -1.6495425 |
| C        | 5.0552728        | -11.7558500 | 1.0331445  |
| C        | 4.1260396        | -8.7930353  | 1.7013966  |
| C        | 5.6599764        | -8.7477089  | 1.8477151  |
| C        | 3.4595060        | -9.5506153  | 2.8644772  |



|   |            |             |            |
|---|------------|-------------|------------|
| C | 3.6484604  | -7.3358759  | 1.7871006  |
| C | 3.5987265  | -10.5250520 | -4.0345616 |
| C | 1.7601914  | -8.9702353  | -3.5305446 |
| C | 1.4106725  | -11.3577021 | -3.0141595 |
| H | 0.9122976  | -11.3800576 | -3.9928828 |
| H | 0.6472017  | -11.1483665 | -2.2524377 |
| H | 1.8374867  | -12.3489130 | -2.8360189 |
| H | 3.1749325  | -10.4962196 | -5.0473113 |
| H | 4.0646427  | -11.5046682 | -3.8989228 |
| H | 4.3729690  | -9.7466498  | -3.9740592 |
| H | 1.4237129  | -9.2173380  | -4.5519938 |
| H | 2.4198093  | -8.0992327  | -3.5819801 |
| H | 0.8884427  | -8.6986715  | -2.9298931 |
| H | 4.0625154  | -6.6997434  | 0.9993504  |
| H | 4.0147330  | -6.9725756  | 2.7620330  |
| H | 2.5603343  | -7.2389320  | 1.7613707  |
| H | 3.8637830  | -10.5570544 | 3.0064995  |
| H | 2.3743612  | -9.6127493  | 2.7046031  |
| H | 3.6322516  | -8.9879321  | 3.7922351  |
| H | 6.1149367  | -8.2657818  | 0.9711024  |
| H | 6.1138979  | -9.7311531  | 1.9919446  |
| H | 5.9037161  | -8.1379040  | 2.7282198  |
| C | 3.2596177  | -13.6453054 | -1.3710030 |
| C | 5.3196328  | -12.8394932 | -2.3332422 |
| C | 3.5646557  | -14.9394167 | -1.7971813 |
| H | 2.3431633  | -13.4622839 | -0.8082102 |
| C | 4.7464651  | -15.1864914 | -2.4991149 |
| H | 2.8783923  | -15.7571703 | -1.5725185 |
| C | 5.6264068  | -14.1331315 | -2.7598212 |
| H | 4.9856853  | -16.1970883 | -2.8324275 |
| H | 6.5599813  | -14.3184631 | -3.2929168 |
| H | 6.0168788  | -12.0240251 | -2.5305848 |
| C | 4.3979508  | -12.6448668 | 1.9002339  |
| C | 6.4509110  | -11.8569494 | 0.9076122  |
| C | 5.1174079  | -13.5783687 | 2.6494006  |
| C | 7.1717536  | -12.7896708 | 1.6554767  |
| C | 6.5076858  | -13.6496787 | 2.5343319  |
| H | 3.3111167  | -12.6068611 | 1.9811207  |
| H | 7.0700368  | -14.3788207 | 3.1190356  |
| H | 4.5867476  | -14.2569194 | 3.3185665  |
| H | 8.2556635  | -12.8482905 | 1.5461574  |
| H | 6.9743812  | -11.1951879 | 0.2163803  |
| C | -2.0387186 | -8.4625195  | 0.9299418  |
| C | -1.6844287 | -7.2026610  | 0.4228665  |
| C | -1.0830344 | -9.4826095  | 0.8949458  |
| C | 0.1909382  | -9.2585527  | 0.3690863  |

|   |            |             |            |
|---|------------|-------------|------------|
| C | 0.5747799  | -7.9928925  | -0.1508002 |
| C | -0.4172985 | -6.9723274  | -0.1013999 |
| H | -0.1732410 | -5.9791108  | -0.4889975 |
| H | -2.4109206 | -6.3865860  | 0.4370377  |
| H | -1.3314771 | -10.4737826 | 1.2834023  |
| H | -3.0330893 | -8.6407610  | 1.3402694  |
| H | 0.9044137  | -10.0865715 | 0.3626087  |
| P | 2.1660080  | -7.5268538  | -0.8759051 |

*Selenourea*  $R_2=H$   $R_1=H$

10

Energy = -2628.184125121

|    |            |            |            |
|----|------------|------------|------------|
| C  | -5.3822171 | 0.8837357  | -0.0000000 |
| C  | -4.0238814 | 0.9651177  | -0.0000000 |
| N  | -3.5483368 | -0.3395759 | 0.0000000  |
| N  | -5.6984594 | -0.4684189 | -0.0000000 |
| C  | -4.5723760 | -1.2563953 | -0.0000000 |
| H  | -3.3698535 | 1.8275589  | 0.0000000  |
| H  | -6.1346029 | 1.6617322  | 0.0000000  |
| H  | -2.5788440 | -0.6344606 | -0.0000000 |
| H  | -6.6258428 | -0.8768569 | 0.0000000  |
| Se | -4.4631461 | -3.0796667 | 0.0000000  |

*Selenourea*  $R_2=NH_2$   $R_1=H$

14

Energy = -2738.935470429

|    |            |            |            |
|----|------------|------------|------------|
| C  | -4.0309069 | 1.2791820  | 0.0000000  |
| C  | -4.5763116 | -0.9537233 | 0.0000000  |
| C  | -5.3985907 | 1.1926062  | 0.0000000  |
| N  | -3.5573629 | -0.0375515 | 0.0000000  |
| N  | -5.7023205 | -0.1730374 | -0.0000000 |
| H  | -2.5883158 | -0.3324397 | 0.0000000  |
| H  | -6.6266368 | -0.5879288 | -0.0000000 |
| N  | -6.3871501 | 2.1647653  | -0.0000000 |
| H  | -6.1578208 | 3.1455150  | 0.0000000  |
| H  | -7.3636566 | 1.9155811  | 0.0000000  |
| N  | -3.1726884 | 2.3679996  | 0.0000000  |
| H  | -2.1725464 | 2.2434408  | -0.0000000 |
| H  | -3.5235881 | 3.3119970  | -0.0000000 |
| Se | -4.4601943 | -2.7843062 | -0.0000000 |

*Selenourea*  $R_2=H$   $R_1=OH$

12

Energy = -2778.564213131

|   |            |            |            |
|---|------------|------------|------------|
| C | -3.9248779 | 0.7308751  | 0.0000000  |
| C | -4.5295509 | -1.4999896 | 0.0000000  |
| C | -5.2952248 | 0.6809837  | -0.0000000 |

|    |            |            |            |
|----|------------|------------|------------|
| N  | -3.4984909 | -0.5781062 | -0.0000000 |
| N  | -5.6249234 | -0.6557341 | 0.0000000  |
| H  | -6.0273638 | 1.4788841  | -0.0000000 |
| H  | -3.2528170 | 1.5801247  | -0.0000000 |
| O  | -6.9022128 | -1.1903308 | -0.0000000 |
| H  | -7.4940135 | -0.4118393 | 0.0000000  |
| O  | -2.1856117 | -1.0182351 | -0.0000000 |
| H  | -1.6520194 | -0.1987308 | -0.0000000 |
| Se | -4.4634140 | -3.3149016 | -0.0000000 |

*Selenourea*  $R_2=H$   $R_1=NH_2$

14

Energy = -2738.889132896

|    |            |            |            |
|----|------------|------------|------------|
| C  | -4.0563560 | 0.8585228  | 0.0003608  |
| C  | -4.8268803 | -1.2908740 | 0.0269744  |
| C  | -5.4169517 | 0.9149804  | 0.0240483  |
| N  | -3.7097114 | -0.4849464 | -0.0035094 |
| N  | -5.8734651 | -0.3950446 | 0.0457799  |
| H  | -6.1048535 | 1.7498007  | 0.0282554  |
| H  | -3.3019749 | 1.6338384  | -0.0155838 |
| N  | -7.2323417 | -0.7383940 | 0.0688690  |
| H  | -7.3985373 | -1.2466852 | 0.9470222  |
| H  | -7.3654579 | -1.4427785 | -0.6688192 |
| N  | -2.3837476 | -0.9395315 | -0.0239437 |
| H  | -2.2623470 | -1.4719578 | -0.8950684 |
| H  | -2.3063862 | -1.6417138 | 0.7237572  |
| Se | -4.9031595 | -3.1184565 | 0.0391671  |

*Selenourea*  $R_2=H$   $R_1=CH_3$

16

Energy = -2706.832547867

|    |            |            |            |
|----|------------|------------|------------|
| C  | -5.4761523 | 0.7713350  | 0.0000000  |
| C  | -4.1160999 | 0.8466059  | -0.0000000 |
| N  | -3.6326911 | -0.4534121 | -0.0000000 |
| N  | -5.8129967 | -0.5740203 | 0.0000000  |
| C  | -4.6764131 | -1.3530356 | -0.0000000 |
| H  | -6.2246601 | 1.5538074  | 0.0000000  |
| H  | -3.4585363 | 1.7068468  | -0.0000000 |
| C  | -2.2361124 | -0.8510725 | -0.0000000 |
| H  | -1.6148506 | 0.0517440  | -0.0000000 |
| H  | -2.0181806 | -1.4591952 | -0.8883080 |
| H  | -2.0181806 | -1.4591952 | 0.8883080  |
| C  | -7.1571479 | -1.1236848 | -0.0000000 |
| H  | -7.8743638 | -0.2949520 | -0.0000000 |
| H  | -7.3065112 | -1.7521181 | 0.8881681  |
| H  | -7.3065112 | -1.7521181 | -0.8881681 |
| Se | -4.5752023 | -3.1827853 | 0.0000000  |

*Selenourea*  $R_2=F$   $R_1=H$

10

Energy = -2826.733951801

|    |            |            |            |
|----|------------|------------|------------|
| C  | -5.4456060 | 0.8952040  | 0.0000000  |
| C  | -4.0952008 | 1.0225688  | -0.0000000 |
| N  | -3.5659388 | -0.2617890 | -0.0000000 |
| N  | -5.7245379 | -0.4655934 | -0.0000000 |
| C  | -4.5651083 | -1.2127051 | 0.0000000  |
| H  | -2.5810136 | -0.5050042 | 0.0000000  |
| H  | -6.6464873 | -0.8886969 | -0.0000000 |
| F  | -6.4113060 | 1.8071808  | -0.0000000 |
| F  | -3.3179396 | 2.0990909  | 0.0000000  |
| Se | -4.3932517 | -3.0248159 | -0.0000000 |

*Selenourea*  $R_2=Cl$   $R_1=H$

10

Energy = -3547.504626047

|    |            |            |            |
|----|------------|------------|------------|
| C  | -4.0759100 | 1.0326135  | -0.0000000 |
| C  | -4.4885213 | -1.2209367 | 0.0000000  |
| C  | -5.4314926 | 0.8668423  | 0.0000000  |
| N  | -3.5185619 | -0.2425482 | -0.0000000 |
| N  | -5.6654941 | -0.5048681 | -0.0000000 |
| H  | -2.5276129 | -0.4599776 | 0.0000000  |
| H  | -6.5750279 | -0.9543765 | 0.0000000  |
| Cl | -6.6815958 | 2.0191048  | -0.0000000 |
| Cl | -3.1402884 | 2.4521402  | 0.0000000  |
| Se | -4.2672350 | -3.0267338 | -0.0000000 |

*Selenourea*  $R_2=CHO$   $R_1=H$

14

Energy = -2854.951281781

|    |            |            |            |
|----|------------|------------|------------|
| C  | -5.6279272 | 1.1489054  | -0.0000000 |
| C  | -4.2633451 | 1.4207499  | -0.0000000 |
| N  | -3.6259296 | 0.2035496  | -0.0000000 |
| N  | -5.7499521 | -0.2196241 | 0.0000000  |
| C  | -4.5193779 | -0.8545234 | 0.0000000  |
| H  | -2.6155438 | 0.0845630  | -0.0000000 |
| H  | -6.6376512 | -0.7166325 | 0.0000000  |
| C  | -3.5374648 | 2.6865157  | 0.0000000  |
| C  | -6.7838107 | 2.0394822  | -0.0000000 |
| O  | -7.9320297 | 1.6137299  | 0.0000000  |
| H  | -6.5566673 | 3.1289240  | -0.0000000 |
| O  | -2.3138464 | 2.7335122  | 0.0000000  |
| H  | -4.1649372 | 3.6056123  | 0.0000000  |
| Se | -4.1665970 | -2.6257544 | -0.0000000 |

*Selenourea*  $R_2=H$   $R_1=Cl$

10

Energy = -3547.413316995

|    |            |            |            |
|----|------------|------------|------------|
| C  | -3.9859005 | 0.7722487  | -0.0000000 |
| C  | -4.6132890 | -1.4642204 | -0.0000000 |
| C  | -5.3446307 | 0.7404112  | 0.0000000  |
| N  | -3.5609491 | -0.5513537 | 0.0000000  |
| N  | -5.7070774 | -0.6015832 | -0.0000000 |
| H  | -6.0758591 | 1.5374950  | 0.0000000  |
| H  | -3.2928894 | 1.6026865  | 0.0000000  |
| Cl | -7.3042842 | -1.1457197 | -0.0000000 |
| Cl | -1.9400474 | -1.0200436 | -0.0000000 |
| Se | -4.5711231 | -3.2683008 | 0.0000000  |

*Selenourea*  $R_2=H$   $R_1=COOH$

16

Energy = -3005.535902971

|    |            |            |            |
|----|------------|------------|------------|
| C  | -4.0001561 | 0.4348956  | -0.0050214 |
| C  | -4.5208747 | -1.7842215 | -0.0019132 |
| C  | -5.3447172 | 0.3413354  | -0.0068491 |
| N  | -3.4856024 | -0.8687776 | -0.0019485 |
| N  | -5.6730864 | -1.0210275 | -0.0049270 |
| C  | -7.0813752 | -1.4195916 | -0.0055270 |
| C  | -2.0352840 | -1.0658250 | 0.0014874  |
| O  | -1.3228100 | -0.0934121 | -0.0001603 |
| O  | -7.9238510 | -0.5573712 | -0.0095023 |
| O  | -7.3196197 | -2.7185654 | -0.0012403 |
| H  | -6.4623297 | -3.2619532 | 0.0009604  |
| O  | -1.6158093 | -2.3178557 | 0.0065702  |
| H  | -2.3871398 | -2.9769812 | 0.0064514  |
| H  | -6.1276816 | 1.0874347  | -0.0090522 |
| H  | -3.3284224 | 1.2826283  | -0.0052563 |
| Se | -4.3903706 | -3.6282820 | 0.0011482  |

*Selenourea*  $R_1=CH_3$   $R_2=SH$

18

Energy = -3503.3417192240

|   |            |           |            |
|---|------------|-----------|------------|
| C | 0.4924239  | 8.6211550 | 24.1264502 |
| N | 0.6856703  | 7.6697980 | 25.1232145 |
| C | 0.1184534  | 6.4643095 | 24.7556156 |
| C | -0.4452970 | 6.6301670 | 23.5109593 |
| N | -0.2086157 | 7.9689308 | 23.1442523 |
| C | 1.3916121  | 7.9167604 | 26.3698912 |
| C | -0.6437855 | 8.5838461 | 21.9019870 |
| H | 1.6894061  | 8.9733030 | 26.3635747 |
| H | 2.2846143  | 7.2798751 | 26.4367118 |
| H | 0.7319886  | 7.7197799 | 27.2260993 |
| H | -1.7371779 | 8.5342767 | 21.8142117 |
| H | -0.1896397 | 8.0755480 | 21.0408380 |
| H | -0.3150142 | 9.6301477 | 21.9331369 |
| S | 0.1931254  | 5.0594614 | 25.7939777 |

|    |            |            |            |
|----|------------|------------|------------|
| S  | -1.3892937 | 5.4864999  | 22.5993845 |
| H  | -0.5222341 | 4.3075909  | 24.9159924 |
| H  | -0.4136496 | 5.0080402  | 21.7754026 |
| Se | 1.0646431  | 10.3645305 | 24.1496803 |

*Selenourea*  $R_1=CH_3$   $R_2=COH$

20

|          |                  |            |            |
|----------|------------------|------------|------------|
| Energy = | -2933.5799080590 |            |            |
| C        | -0.1945083       | -0.5981639 | 0.0695999  |
| N        | 0.2463815        | -1.5742279 | 0.9488366  |
| C        | -0.3666509       | -2.7926903 | 0.6894644  |
| C        | -0.0861856       | -3.9779195 | 1.5171311  |
| C        | -1.2200454       | -2.5888664 | -0.3935282 |
| C        | -2.0840149       | -3.5046422 | -1.1587312 |
| N        | -1.1060222       | -1.2508255 | -0.7442315 |
| C        | 1.2089776        | -1.3067668 | 2.0122231  |
| C        | -1.8112481       | -0.5866893 | -1.8356285 |
| H        | -2.8961335       | -0.6273017 | -1.6737138 |
| H        | -1.5595504       | -1.0513287 | -2.7975348 |
| H        | -1.4781813       | 0.4589843  | -1.8332068 |
| H        | 1.4571075        | -0.2395104 | 1.9480131  |
| H        | 2.1190638        | -1.9039024 | 1.8684860  |
| H        | 0.7691933        | -1.5267307 | 2.9936592  |
| O        | -2.0870346       | -4.7183239 | -1.0693766 |
| O        | -0.7160042       | -5.0193240 | 1.4998686  |
| H        | -2.7609840       | -2.9819959 | -1.8774314 |
| H        | 0.7811544        | -3.8437638 | 2.2082162  |
| Se       | 0.3171054        | 1.1527889  | -0.0035555 |

*Selenourea*  $R_1=CH_3$   $R_2=C_6H_5$

36

|          |                  |            |            |
|----------|------------------|------------|------------|
| Energy = | -3169.1206996230 |            |            |
| C        | -0.2005518       | -1.0496581 | 0.1928219  |
| N        | 0.0360941        | -1.9478537 | 1.2087898  |
| C        | -0.6676732       | -3.1363954 | 0.9893212  |
| C        | -0.6442011       | -4.2825777 | 1.9094796  |
| C        | -1.3672799       | -2.9733683 | -0.1885873 |
| C        | -2.2512865       | -3.9170825 | -0.8877741 |
| N        | -1.0655344       | -1.6927357 | -0.6636269 |
| C        | 0.8244881        | -1.6106140 | 2.3835362  |
| C        | -1.4851723       | -1.1149405 | -1.9308639 |
| H        | -2.3407382       | -0.4385152 | -1.7921160 |
| H        | -1.7586618       | -1.9195173 | -2.6212356 |
| H        | -0.6497092       | -0.5255935 | -2.3295380 |
| H        | 0.6612354        | -0.5493220 | 2.6098056  |
| H        | 1.8978650        | -1.7552791 | 2.1939894  |
| H        | 0.5093943        | -2.2408713 | 3.2218603  |
| C        | -1.8186279       | -5.2289742 | -1.1586615 |
| C        | -1.8486033       | -4.8533516 | 2.3620621  |
| C        | -3.5487836       | -3.5416557 | -1.2863662 |

|    |            |            |            |
|----|------------|------------|------------|
| C  | 0.5708081  | -4.8449374 | 2.3464964  |
| C  | -4.3845345 | -4.4497692 | -1.9374359 |
| C  | -3.9439155 | -5.7509622 | -2.1973185 |
| C  | -2.6596704 | -6.1370407 | -1.8025359 |
| H  | -0.8121653 | -5.5286129 | -0.8646161 |
| H  | -2.3061522 | -7.1490454 | -2.0053418 |
| H  | -4.5980606 | -6.4597392 | -2.7068578 |
| H  | -5.3879524 | -4.1418083 | -2.2348217 |
| H  | -3.9104780 | -2.5361102 | -1.0663724 |
| C  | -1.8370056 | -5.9550908 | 3.2174582  |
| H  | -2.7965532 | -4.4199764 | 2.0422444  |
| C  | 0.5785690  | -5.9422044 | 3.2081032  |
| C  | -0.6246554 | -6.5019865 | 3.6469796  |
| H  | 1.5300972  | -6.3667504 | 3.5315341  |
| H  | 1.5153047  | -4.4305693 | 1.9909536  |
| H  | -0.6170110 | -7.3590132 | 4.3216806  |
| H  | -2.7811145 | -6.3819935 | 3.5591116  |
| Se | 0.4894561  | 0.6420059  | 0.0178421  |

*Selenourea*  $R_1=CH_3$   $R_2=Br$

16

|          |                  |            |            |
|----------|------------------|------------|------------|
| Energy = | -7854.5114028830 |            |            |
| C        | 0.5609315        | 8.4959987  | 24.0856505 |
| N        | 0.7360257        | 7.6100567  | 25.1343992 |
| C        | 0.1556548        | 6.3873001  | 24.8190788 |
| C        | -0.3873068       | 6.4973252  | 23.5705619 |
| N        | -0.1371125       | 7.7925963  | 23.1237537 |
| C        | 1.4248674        | 7.9323783  | 26.3732981 |
| C        | -0.5252497       | 8.3750079  | 21.8490126 |
| H        | 1.7551247        | 8.9750116  | 26.2842632 |
| H        | 2.2922066        | 7.2735462  | 26.5112330 |
| H        | 0.7440195        | 7.8255843  | 27.2279650 |
| H        | -1.0688516       | 7.6222821  | 21.2692766 |
| H        | 0.3711223        | 8.7018855  | 21.3060297 |
| H        | -1.1591900       | 9.2537270  | 22.0248099 |
| Br       | 0.1711114        | 4.9181393  | 25.9699481 |
| Br       | -1.3049981       | 5.2049728  | 22.5855705 |
| Se       | 1.1206849        | 10.2343679 | 23.9646791 |

*Selenourea*  $R_1=CH_3$   $R_2=CH_3$

22

|          |                  |           |            |
|----------|------------------|-----------|------------|
| Energy = | -2785.4961363050 |           |            |
| C        | 0.5625034        | 8.4770202 | 24.1071636 |
| N        | 0.7392737        | 7.5976469 | 25.1505208 |
| C        | 0.1623665        | 6.3623507 | 24.8527790 |
| C        | -0.3873534       | 6.4619348 | 23.6029532 |
| N        | -0.1347863       | 7.7675594 | 23.1571172 |
| C        | 1.4285253        | 7.9318672 | 26.3827668 |
| C        | -0.5149610       | 8.3675178 | 21.8892918 |
| C        | -1.1264278       | 5.4208813 | 22.8235502 |

|    |            |            |            |
|----|------------|------------|------------|
| C  | 0.1932695  | 5.2094715  | 25.7946950 |
| H  | 1.7640119  | 8.9733426  | 26.2882908 |
| H  | 2.2983913  | 7.2770882  | 26.5324909 |
| H  | 0.7518928  | 7.8410212  | 27.2442230 |
| H  | -1.0814496 | 7.6447509  | 21.2943012 |
| H  | 0.3829335  | 8.6816248  | 21.3396180 |
| H  | -1.1258748 | 9.2621075  | 22.0707725 |
| H  | -0.3198118 | 4.3480500  | 25.3502864 |
| H  | -0.3075207 | 5.4409751  | 26.7483903 |
| H  | 1.2224279  | 4.8980108  | 26.0341758 |
| H  | -1.4390579 | 5.7903594  | 21.8403996 |
| H  | -2.0365067 | 5.0936509  | 23.3480537 |
| H  | -0.5042152 | 4.5307996  | 22.6484006 |
| Se | 1.1246293  | 10.2246594 | 23.9805594 |

*Selenourea*  $R_1=CH_3$   $R_2=Cl$

16

|          |                  |            |            |
|----------|------------------|------------|------------|
| Energy = | -3626.1536605630 |            |            |
| C        | 0.5573906        | 8.4847755  | 24.0864022 |
| N        | 0.7319723        | 7.5991702  | 25.1348361 |
| C        | 0.1515821        | 6.3757274  | 24.8204805 |
| C        | -0.3914576       | 6.4857108  | 23.5719920 |
| N        | -0.1402799       | 7.7813400  | 23.1253184 |
| C        | 1.4196073        | 7.9136708  | 26.3758202 |
| C        | -0.5320462       | 8.3559450  | 21.8484594 |
| H        | 1.7524386        | 8.9560617  | 26.2936753 |
| H        | 2.2858017        | 7.2526223  | 26.5108246 |
| H        | 0.7371742        | 7.8040884  | 27.2289106 |
| H        | -1.0735392       | 7.5980671  | 21.2731519 |
| H        | 0.3623996        | 8.6842333  | 21.3029163 |
| H        | -1.1687366       | 9.2336149  | 22.0203911 |
| Cl       | 0.1695753        | 5.0393582  | 25.8755528 |
| Cl       | -1.2300669       | 5.3128669  | 22.6657154 |
| Se       | 1.1172448        | 10.2229075 | 23.9650535 |

*Selenourea*  $R_1=CH_3$   $R_2=COOCH_3$

28

|          |                  |           |            |
|----------|------------------|-----------|------------|
| Energy = | -3162.8003079040 |           |            |
| C        | 0.5580781        | 8.3658975 | 24.0762089 |
| N        | 0.4695978        | 7.6312043 | 25.2449004 |
| C        | -0.1662862       | 6.4178877 | 25.0055059 |
| C        | -0.4843522       | 6.3859630 | 23.6646648 |
| N        | -0.0400395       | 7.5744739 | 23.1088929 |
| C        | 1.0570549        | 8.0717746 | 26.5054265 |
| C        | -0.2262276       | 8.0045151 | 21.7280392 |
| H        | 1.5864783        | 9.0086906 | 26.2917891 |
| H        | 1.7593487        | 7.3158146 | 26.8789859 |
| H        | 0.2744279        | 8.2411583 | 27.2533472 |
| H        | -1.2883104       | 7.9535339 | 21.4572157 |
| H        | 0.3543166        | 7.3695396 | 21.0498549 |



|    |            |            |            |
|----|------------|------------|------------|
| H  | 0.1285266  | 9.0408616  | 21.6719772 |
| C  | -0.3760639 | 5.3308093  | 25.9866880 |
| C  | -1.2460647 | 5.3386880  | 22.9371728 |
| O  | -0.5854184 | 5.8159671  | 27.2403616 |
| O  | -0.7041109 | 5.0981758  | 21.7144238 |
| C  | -1.3996977 | 4.0983753  | 20.9299971 |
| O  | -2.2303556 | 4.7801243  | 23.3746370 |
| O  | -0.3640929 | 4.1487098  | 25.7051995 |
| C  | -0.7844428 | 4.8019895  | 28.2545225 |
| H  | -1.7021497 | 4.2364740  | 28.0490482 |
| H  | -0.8685744 | 5.3493925  | 29.1982745 |
| H  | 0.0670983  | 4.1101503  | 28.2762545 |
| H  | -0.8809804 | 4.0737455  | 19.9670637 |
| H  | -2.4531753 | 4.3771051  | 20.8016480 |
| H  | -1.3428612 | 3.1223984  | 21.4279996 |
| Se | 1.3049667  | 10.0227904 | 23.8491807 |

*Selenourea*  $R_1=CH_3$   $R_2=F$

16

|          |                  |            |            |
|----------|------------------|------------|------------|
| Energy = | -2905.3843741360 |            |            |
| C        | 0.5512369        | 8.4592453  | 24.0917975 |
| N        | 0.7241802        | 7.5691384  | 25.1386969 |
| C        | 0.1418220        | 6.3529329  | 24.8159060 |
| C        | -0.3968700       | 6.4673904  | 23.5767962 |
| N        | -0.1472328       | 7.7578714  | 23.1295849 |
| C        | 1.4081280        | 7.8674836  | 26.3868489 |
| C        | -0.5506797       | 8.3077491  | 21.8447630 |
| H        | 1.7434002        | 8.9102837  | 26.3116163 |
| H        | 2.2728528        | 7.2043915  | 26.5203621 |
| H        | 0.7232759        | 7.7548168  | 27.2375573 |
| H        | -1.0893480       | 7.5345947  | 21.2872245 |
| H        | 0.3373580        | 8.6304043  | 21.2859724 |
| H        | -1.1960451       | 9.1812876  | 22.0034433 |
| F        | 0.1713125        | 5.3218449  | 25.6577044 |
| F        | -1.0586253       | 5.5829513  | 22.8341318 |
| Se       | 1.1142946        | 10.1977941 | 23.9771245 |

*Selenourea*  $R_1=CH_3$   $R_2=H$

16

|          |                  |           |            |
|----------|------------------|-----------|------------|
| Energy = | -2706.8324856230 |           |            |
| C        | 0.5418087        | 8.4314056 | 24.0943732 |
| N        | 0.7103703        | 7.5391229 | 25.1350736 |
| C        | 0.1308301        | 6.3186857 | 24.8204417 |
| C        | -0.4079868       | 6.4348990 | 23.5759533 |
| N        | -0.1544396       | 7.7261483 | 23.1378099 |
| C        | 1.3981443        | 7.8526807 | 26.3753369 |
| C        | -0.5504576       | 8.2897691 | 21.8589069 |
| H        | 1.7340990        | 8.8956760 | 26.3017319 |
| H        | 2.2664586        | 7.1934591 | 26.5106104 |
| H        | 0.7170410        | 7.7436275 | 27.2303668 |
| H        | -1.0900896       | 7.5234371 | 21.2907388 |

|    |            |            |            |
|----|------------|------------|------------|
| H  | 0.3374284  | 8.6177672  | 21.3017407 |
| H  | -1.1941061 | 9.1654031  | 22.0175156 |
| H  | 0.1500942  | 5.4777776  | 25.5025105 |
| H  | -0.9455992 | 5.7164729  | 22.9698075 |
| Se | 1.1054643  | 10.1738482 | 23.9766223 |

*Selenourea*  $R_1=CH_3$   $R_2=I$

16

|          |                  |            |            |
|----------|------------------|------------|------------|
| Energy = | -3301.3364258470 |            |            |
| C        | 0.5664568        | 8.5117306  | 24.0846186 |
| N        | 0.7406473        | 7.6259495  | 25.1329782 |
| C        | 0.1593955        | 6.4006400  | 24.8201689 |
| C        | -0.3851468       | 6.5113422  | 23.5678326 |
| N        | -0.1316964       | 7.8088886  | 23.1229643 |
| C        | 1.4315681        | 7.9553846  | 26.3690500 |
| C        | -0.5159481       | 8.3987256  | 21.8501281 |
| H        | 1.7583836        | 8.9987790  | 26.2782752 |
| H        | 2.3016065        | 7.3004968  | 26.5076139 |
| H        | 0.7540684        | 7.8478578  | 27.2261234 |
| H        | -1.0582169       | 7.6486807  | 21.2651746 |
| H        | 0.3809875        | 8.7277629  | 21.3092270 |
| H        | -1.1513907       | 9.2764187  | 22.0262172 |
| I        | 0.1734732        | 4.7681636  | 26.0931938 |
| I        | -1.4015203       | 5.0690681  | 22.4837295 |
| Se       | 1.1263722        | 10.2503214 | 23.9622145 |

*Selenourea*  $R_1=CH_3$   $R_2=COCH_3$

26

|          |                  |           |            |
|----------|------------------|-----------|------------|
| Energy = | -3012.2563495190 |           |            |
| C        | 0.3615583        | 8.5830820 | 24.2683101 |
| N        | 0.4304257        | 7.6456857 | 25.2818776 |
| C        | -0.1352346       | 6.4348147 | 24.8635567 |
| C        | -0.5555004       | 6.6285721 | 23.5561291 |
| N        | -0.2615493       | 7.9284897 | 23.2150229 |
| C        | 0.9210931        | 7.9850910 | 26.6106961 |
| C        | -0.5260977       | 8.5516449 | 21.9211087 |
| H        | 1.2216092        | 9.0404136 | 26.5699304 |
| H        | 1.7884621        | 7.3706015 | 26.8798715 |
| H        | 0.1279156        | 7.8590233 | 27.3590042 |
| H        | -1.6050982       | 8.5790374 | 21.7360945 |
| H        | -0.0347730       | 7.9831961 | 21.1212286 |
| H        | -0.1125199       | 9.5655356 | 21.9691348 |
| C        | -0.3398555       | 5.1874507 | 25.6208417 |
| C        | -1.2702163       | 5.7062005 | 22.6087937 |
| C        | 0.4421464        | 4.8952586 | 26.8846067 |
| H        | 0.2773744        | 3.8445687 | 27.1470991 |
| H        | 0.0940827        | 5.5228880 | 27.7180282 |
| H        | 1.5172151        | 5.0838758 | 26.7554162 |
| C        | -0.6543841       | 4.3668038 | 22.2845652 |
| H        | 0.0621064        | 4.0248724 | 23.0369498 |

|    |            |            |            |
|----|------------|------------|------------|
| H  | -0.1312403 | 4.4759661  | 21.3194707 |
| H  | -1.4474974 | 3.6213606  | 22.1530830 |
| O  | -2.2736761 | 6.1165192  | 22.0415630 |
| O  | -1.1408203 | 4.3598817  | 25.1802032 |
| Se | 0.9579941  | 10.3122361 | 24.2939642 |

Selenourea  $R_1=CH_3$   $R_2=NH_2$

20

|          |                  |            |            |
|----------|------------------|------------|------------|
| Energy = | -2817.5986682590 |            |            |
| C        | -0.2980874       | -0.5991373 | 0.0756339  |
| N        | 0.1852233        | -1.5772198 | 0.9272867  |
| C        | -0.3562821       | -2.8153616 | 0.5991538  |
| N        | -0.0976121       | -3.9505629 | 1.3746489  |
| C        | -1.1952336       | -2.6289725 | -0.4694638 |
| N        | -1.9559231       | -3.5241344 | -1.2356979 |
| N        | -1.1480263       | -1.2533566 | -0.7753691 |
| C        | 1.1035614        | -1.3275678 | 2.0223291  |
| C        | -1.8922087       | -0.6087341 | -1.8413397 |
| H        | -2.8540523       | -0.2207562 | -1.4734765 |
| H        | -2.0732874       | -1.3429908 | -2.6344989 |
| H        | -1.2967531       | 0.2365851  | -2.2079455 |
| H        | 0.9985738        | -0.2728322 | 2.3066437  |
| H        | 2.1474230        | -1.5001844 | 1.7191839  |
| H        | 0.8472144        | -1.9868577 | 2.8610065  |
| H        | -1.4479541       | -4.3506494 | -1.5455464 |
| H        | -2.8562564       | -3.7883129 | -0.8361033 |
| H        | -0.7009695       | -4.7282578 | 1.1107288  |
| H        | 0.8770641        | -4.2562096 | 1.3563754  |
| Se       | 0.1177363        | 1.1927429  | 0.0998804  |

Selenourea  $R_1=CH_3$   $R_2=NO_2$

20

|          |                  |            |            |
|----------|------------------|------------|------------|
| Energy = | -3116.0557007120 |            |            |
| C        | -0.2516430       | -0.5920733 | 0.0933544  |
| N        | 0.2081648        | -1.5693046 | 0.9735693  |
| C        | -0.3716072       | -2.7795361 | 0.6692824  |
| N        | -0.1198552       | -3.9901139 | 1.4192286  |
| C        | -1.2131577       | -2.5816398 | -0.4029101 |
| N        | -2.0260606       | -3.5450772 | -1.1111196 |
| N        | -1.1367410       | -1.2536419 | -0.7549360 |
| C        | 1.1050085        | -1.2888285 | 2.0943882  |
| C        | -1.8069974       | -0.6093734 | -1.8841212 |
| H        | -2.8858228       | -0.5606343 | -1.7022446 |
| H        | -1.6177117       | -1.1731547 | -2.8052509 |
| H        | -1.3821321       | 0.3987104  | -1.9576839 |
| H        | 1.2324948        | -0.2003317 | 2.1189701  |
| H        | 2.0676091        | -1.7870124 | 1.9396462  |
| H        | 0.6572433        | -1.6429359 | 3.0305333  |
| O        | -3.1148626       | -3.1380940 | -1.5390873 |
| O        | -1.5688790       | -4.6810355 | -1.2383799 |
| O        | 1.0350268        | -4.1482805 | 1.8378182  |

|    |            |            |           |
|----|------------|------------|-----------|
| O  | -1.0698815 | -4.7544197 | 1.5880881 |
| Se | 0.2054647  | 1.1671071  | 0.0584148 |

*Selenourea*  $R_1=CH_3$   $R_2=OH$

18

|          |                  |            |            |
|----------|------------------|------------|------------|
| Energy = | -2857.3477796950 |            |            |
| C        | 0.5666131        | 8.4518718  | 24.0780331 |
| N        | 0.7149826        | 7.5487031  | 25.1201119 |
| C        | 0.1320508        | 6.3396613  | 24.7841236 |
| C        | -0.3970315       | 6.4617711  | 23.5346448 |
| N        | -0.1015266       | 7.7645598  | 23.0967981 |
| C        | 1.3719346        | 7.8334086  | 26.3846337 |
| C        | -0.4611661       | 8.3223719  | 21.8063660 |
| H        | 1.7166181        | 8.8739923  | 26.3302456 |
| H        | 2.2268345        | 7.1605357  | 26.5318220 |
| H        | 0.6680753        | 7.7145376  | 27.2190700 |
| H        | -0.7313152       | 7.4987802  | 21.1351602 |
| H        | 0.3983441        | 8.8742499  | 21.4053205 |
| H        | -1.3024094       | 9.0244956  | 21.9025082 |
| O        | 0.1822432        | 5.3044431  | 25.6612949 |
| O        | -0.9587712       | 5.4977545  | 22.7429762 |
| H        | -0.1519102       | 4.5092514  | 25.2069106 |
| H        | -1.9291155       | 5.6036338  | 22.7223128 |
| Se       | 1.1250796        | 10.2006484 | 24.0132977 |

*Selenourea*  $R_1=CH_3$   $R_2=OCH_3G$

24

|          |                  |            |            |
|----------|------------------|------------|------------|
| Energy = | -2935.9713770060 |            |            |
| C        | 0.5125733        | 8.5861851  | 24.1043358 |
| N        | 0.6825534        | 7.6244046  | 25.0832455 |
| C        | 0.1196344        | 6.4185191  | 24.6833370 |
| C        | -0.4163537       | 6.6068433  | 23.4359736 |
| N        | -0.1737543       | 7.9550251  | 23.1000494 |
| C        | 1.3571172        | 7.8358553  | 26.3523122 |
| C        | -0.6143928       | 8.5984635  | 21.8761950 |
| H        | 1.6526773        | 8.8925647  | 26.3762134 |
| H        | 2.2459332        | 7.1950268  | 26.4277478 |
| H        | 0.6788591        | 7.6123810  | 27.1862390 |
| H        | -1.5392584       | 8.1197268  | 21.5338990 |
| H        | 0.1541415        | 8.5305941  | 21.0908142 |
| H        | -0.7859248       | 9.6597725  | 22.0958638 |
| O        | 0.2028120        | 5.3824260  | 25.5463690 |
| O        | -1.1389516       | 5.7844398  | 22.6315061 |
| C        | -0.5612512       | 4.2120093  | 25.2135845 |
| C        | -0.3896328       | 5.1699989  | 21.5553466 |
| Se       | 1.0783055        | 10.3359806 | 24.1406043 |
| H        | -1.1054615       | 4.5520941  | 21.0014780 |
| H        | 0.4191840        | 4.5415811  | 21.9596002 |
| H        | 0.0399955        | 5.9295406  | 20.8850586 |
| H        | -0.4367427       | 3.5293295  | 26.0603855 |
| H        | -0.1768946       | 3.7379775  | 24.2978507 |

H -1.6231581 4.4629506 25.0799809

*Selenourea*  $R_1=C(CH_3)_3$   $R_2=H$

34

Energy = -2942.7801711410  
C -0.3273007 -0.6754150 0.2732272  
N 0.2008160 -1.6054411 1.1652670  
C -0.0459784 -2.8883255 0.6903042  
C -0.7104721 -2.7836840 -0.4826664  
N -0.8853985 -1.4354839 -0.7541293  
C 0.9438819 -1.4654635 2.4775634  
C -1.5726509 -0.9331706 -2.0037096  
C -2.8343296 -0.1438372 -1.6173951  
C -2.0008745 -2.1346864 -2.8616326  
C -0.5852006 -0.0871462 -2.8247862  
C 1.2076896 -0.0235787 2.9214426  
C 2.3059147 -2.1696707 2.3106234  
C 0.0978393 -2.1613450 3.5621167  
H -2.4842471 -1.7400565 -3.7645011  
H -2.7323706 -2.7772541 -2.3509585  
H -1.1452400 -2.7438294 -3.1862351  
H -1.0790453 0.2508037 -3.7469177  
H 0.2934866 -0.6869313 -3.1041480  
H -0.2520062 0.7897684 -2.2568220  
H 1.8109000 0.5321459 2.1966786  
H 1.7607855 -0.0835952 3.8716486  
H 0.2837154 0.5393640 3.0841544  
H 2.8894613 -1.6908218 1.5127950  
H 2.2045720 -3.2366902 2.0730962  
H 2.8732235 -2.0878943 3.2474947  
H -0.0615952 -3.2275235 3.3522849  
H -0.8832099 -1.6760491 3.6547714  
H 0.6121246 -2.0836521 4.5297811  
H -3.3397345 0.1965429 -2.5324646  
H -2.5800152 0.7293874 -1.0048580  
H -3.5317435 -0.7829202 -1.0564716  
H 0.2657227 -3.7774631 1.2195107  
H -1.0664297 -3.5671641 -1.1343591  
Se -0.3339106 1.1745604 0.3841948

*Selenourea*  $R_1=C(CH_3)_3$   $R_2=COH$

38

Energy = -3169.5190993670  
C -0.7789004 -0.8897607 0.5388458  
N -0.1256101 -1.8530374 1.3030782  
C -0.4158909 -3.1141023 0.7782508  
C -0.5324508 -4.3999010 1.4961153  
C -1.0797502 -2.9119130 -0.4328515  
C -1.8317912 -3.9459634 -1.1764002  
N -1.2182486 -1.5455925 -0.6199743  
C 0.8957349 -1.5673066 2.4060825

|    |            |            |            |
|----|------------|------------|------------|
| C  | -1.5965812 | -0.8638365 | -1.9302311 |
| C  | -3.0675440 | -0.4252610 | -1.8688065 |
| C  | -1.3653457 | -1.8346698 | -3.1027092 |
| C  | -0.6637165 | 0.3333316  | -2.1831224 |
| C  | 1.6742084  | -0.2771091 | 2.0904892  |
| C  | 1.9354531  | -2.7027986 | 2.4158248  |
| C  | 0.1677931  | -1.4584650 | 3.7525434  |
| H  | -1.4702215 | -1.2615171 | -4.0332420 |
| H  | -2.0954625 | -2.6503546 | -3.1551453 |
| H  | -0.3524420 | -2.2597649 | -3.0850632 |
| H  | -0.9266214 | 0.7672601  | -3.1575719 |
| H  | 0.3850580  | 0.0064726  | -2.2266293 |
| H  | -0.7621513 | 1.1103556  | -1.4187132 |
| H  | 2.1407323  | -0.3283871 | 1.0961427  |
| H  | 2.4767282  | -0.1918169 | 2.8356313  |
| H  | 1.0551852  | 0.6222488  | 2.1427655  |
| H  | 2.3739489  | -2.8464545 | 1.4175329  |
| H  | 1.5237679  | -3.6468383 | 2.7776762  |
| H  | 2.7467681  | -2.4068033 | 3.0935085  |
| H  | -0.3451799 | -2.3980577 | 3.9922779  |
| H  | -0.5595083 | -0.6360206 | 3.7278806  |
| H  | 0.9011446  | -1.2509754 | 4.5443741  |
| H  | -3.3391052 | 0.0775821  | -2.8077167 |
| H  | -3.2251054 | 0.2715202  | -1.0360995 |
| H  | -3.7355771 | -1.2890982 | -1.7398011 |
| Se | -1.2749175 | 0.7923218  | 1.0724278  |
| O  | -1.4679752 | -5.1041197 | -1.3126995 |
| H  | -2.8181552 | -3.6084135 | -1.5691239 |
| O  | -0.3855249 | -4.5788582 | 2.6981130  |
| H  | -0.8391255 | -5.2251860 | 0.8230504  |

Selenourea  $R_1=C(CH_3)_3$   $R_2=Br$

34

|          |                  |            |            |
|----------|------------------|------------|------------|
| Energy = | -8090.4363539730 |            |            |
| C        | -0.7319061       | -0.9959685 | 0.5136484  |
| N        | 0.0257940        | -1.9063179 | 1.2570607  |
| C        | -0.0351215       | -3.1417304 | 0.6072913  |
| Br       | 0.2829882        | -4.8459965 | 1.3515618  |
| C        | -0.7136060       | -2.9767050 | -0.5693770 |
| Br       | -1.3892863       | -4.4390032 | -1.5515934 |
| N        | -1.0904835       | -1.6358848 | -0.6766036 |
| C        | 0.9380539        | -1.5029477 | 2.4250395  |
| C        | -1.5918346       | -0.8955205 | -1.9259327 |
| C        | -3.0577484       | -0.4920890 | -1.7047943 |
| C        | -1.5069164       | -1.7709412 | -3.1861020 |
| C        | -0.6739462       | 0.3124524  | -2.1891362 |
| C        | 1.7799638        | -0.2844817 | 2.0012308  |
| C        | 1.9456790        | -2.6101557 | 2.7743274  |
| C        | 0.0702694        | -1.2246186 | 3.6619059  |
| H        | -1.6823197       | -1.1036040 | -4.0404759 |
| H        | -2.2687948       | -2.5550415 | -3.2180093 |
| H        | -0.5158932       | -2.2246249 | -3.3186185 |

|    |            |            |            |
|----|------------|------------|------------|
| H  | -1.0527781 | 0.8447483  | -3.0724617 |
| H  | 0.3489773  | -0.0268626 | -2.4086922 |
| H  | -0.6491781 | 1.0141665  | -1.3496543 |
| H  | 2.4474246  | -0.5543399 | 1.1701151  |
| H  | 2.4028520  | 0.0165152  | 2.8542247  |
| H  | 1.1647531  | 0.5713277  | 1.7064967  |
| H  | 2.4945061  | -2.9741218 | 1.8959173  |
| H  | 1.4887850  | -3.4592545 | 3.2899608  |
| H  | 2.6776676  | -2.1608322 | 3.4589539  |
| H  | -0.4980558 | -2.1237577 | 3.9394200  |
| H  | -0.6281650 | -0.4000500 | 3.4828620  |
| H  | 0.7248163  | -0.9613305 | 4.5049708  |
| H  | -3.4214944 | 0.0402167  | -2.5954637 |
| H  | -3.1619035 | 0.1635042  | -0.8326054 |
| H  | -3.6820480 | -1.3855259 | -1.5613341 |
| Se | -1.3068206 | 0.6645553  | 1.0815471  |

Selenourea  $R_1=C(CH_3)_3$   $R_2=Cl$

34

|          |                  |            |            |
|----------|------------------|------------|------------|
| Energy = | -3862.0821264590 |            |            |
| C        | -0.6501341       | -0.9810665 | 0.4662766  |
| N        | 0.0997970        | -1.8924673 | 1.2167921  |
| C        | 0.0803765        | -3.1154300 | 0.5429907  |
| Cl       | 0.5153729        | -4.6622292 | 1.1420916  |
| C        | -0.5891257       | -2.9502518 | -0.6358951 |
| Cl       | -1.0468200       | -4.2737881 | -1.6253556 |
| N        | -1.0059261       | -1.6203190 | -0.7258346 |
| C        | 0.9289476        | -1.5163140 | 2.4530545  |
| C        | -1.5978318       | -0.9008962 | -1.9461138 |
| C        | -3.0486081       | -0.5044879 | -1.6295051 |
| C        | -1.6096441       | -1.7899780 | -3.1993915 |
| C        | -0.7056420       | 0.3061281  | -2.2881876 |
| C        | 1.8192187        | -0.3095181 | 2.1016083  |
| C        | 1.8863671        | -2.6427007 | 2.8755478  |
| C        | -0.0258520       | -1.2364110 | 3.6246168  |
| H        | -1.8980109       | -1.1364390 | -4.0338658 |
| H        | -2.3434144       | -2.6004604 | -3.1463187 |
| H        | -0.6226785       | -2.2080419 | -3.4343373 |
| H        | -1.1679313       | 0.8510458  | -3.1228433 |
| H        | 0.2888947        | -0.0343970 | -2.6111360 |
| H        | -0.5969309       | 0.9970926  | -1.4458880 |
| H        | 2.5357174        | -0.5831715 | 1.3138466  |
| H        | 2.3885753        | -0.0284769 | 2.9981260  |
| H        | 1.2379497        | 0.5587462  | 1.7751017  |
| H        | 2.5347045        | -2.9798654 | 2.0571135  |
| H        | 1.3710036        | -3.5058027 | 3.3079734  |
| H        | 2.5329233        | -2.2183388 | 3.6556546  |
| H        | -0.6152184       | -2.1343839 | 3.8589637  |
| H        | -0.7062688       | -0.4084215 | 3.3994993  |
| H        | 0.5693730        | -0.9774837 | 4.5120324  |
| H        | -3.4781652       | 0.0001292  | -2.5066834 |
| H        | -3.0994659       | 0.1733945  | -0.7700769 |

|    |            |            |            |
|----|------------|------------|------------|
| H  | -3.6516345 | -1.3995941 | -1.4197921 |
| Se | -1.1956787 | 0.6999686  | 1.0155954  |

Selenourea  $R_1=C(CH_3)_3$   $R_2=CH_3$

40

|          |                  |            |            |
|----------|------------------|------------|------------|
| Energy = | -3021.4192214990 |            |            |
| C        | -0.6406778       | -0.7912605 | 0.4317615  |
| N        | -0.1547430       | -1.7112990 | 1.3542023  |
| C        | -0.5748421       | -3.0000614 | 0.9713094  |
| C        | -0.5657035       | -4.2212001 | 1.8408635  |
| C        | -1.2030687       | -2.8932670 | -0.2392625 |
| C        | -1.9760863       | -3.9900081 | -0.9061257 |
| N        | -1.1702858       | -1.5381663 | -0.6179130 |
| C        | 0.8878377        | -1.4936777 | 2.4419087  |
| C        | -1.5732289       | -0.9503369 | -1.9628623 |
| C        | -2.9348331       | -0.2487909 | -1.8268838 |
| C        | -1.6793638       | -2.0351621 | -3.0499014 |
| C        | -0.4711689       | 0.0095685  | -2.4540271 |
| C        | 1.4195107        | -0.0557810 | 2.5453930  |
| C        | 2.1196518        | -2.3563389 | 2.0827497  |
| C        | 0.2826485        | -1.8570231 | 3.8108854  |
| H        | -1.7741130       | -1.5142719 | -4.0117204 |
| H        | -2.5590273       | -2.6772992 | -2.9450865 |
| H        | -0.7746868       | -2.6563434 | -3.1015411 |
| H        | -0.7826597       | 0.4280038  | -3.4212888 |
| H        | 0.4699437        | -0.5395356 | -2.6059905 |
| H        | -0.2972548       | 0.8346524  | -1.7558708 |
| H        | 1.7881215        | 0.3243960  | 1.5862803  |
| H        | 2.2626344        | -0.0907021 | 3.2530745  |
| H        | 0.6707966        | 0.6476238  | 2.9178524  |
| H        | 2.5744983        | -1.9842837 | 1.1541124  |
| H        | 1.9024996        | -3.4200929 | 1.9473640  |
| H        | 2.8655320        | -2.2661082 | 2.8846754  |
| H        | 0.0073536        | -2.9126190 | 3.9035647  |
| H        | -0.6106135       | -1.2447781 | 3.9959307  |
| H        | 1.0162711        | -1.6332797 | 4.5979602  |
| H        | -3.2250820       | 0.1798188  | -2.7971947 |
| H        | -2.8830331       | 0.5551105  | -1.0819928 |
| H        | -3.7110302       | -0.9669593 | -1.5244178 |
| H        | -0.7790964       | -5.1084146 | 1.2344760  |
| H        | -1.3370027       | -4.1609519 | 2.6265225  |
| H        | 0.3895367        | -4.4091817 | 2.3424786  |
| H        | -3.0047057       | -3.6804624 | -1.1383141 |
| H        | -2.0502052       | -4.8399121 | -0.2187659 |
| H        | -1.5200785       | -4.3587725 | -1.8336708 |
| Se       | -0.8688456       | 1.0349175  | 0.6920446  |

Selenourea  $R_1=C(CH_3)_3$   $R_2=COOCH_3$

46

|          |                  |  |  |
|----------|------------------|--|--|
| Energy = | -3398.7240277000 |  |  |
|----------|------------------|--|--|



|    |            |            |            |
|----|------------|------------|------------|
| C  | 0.3115075  | -1.2259281 | -0.1636258 |
| N  | 0.2221462  | -2.0068440 | 0.9965548  |
| C  | -0.8513652 | -2.8792743 | 0.8667317  |
| C  | -1.0272539 | -4.1747422 | 1.6253130  |
| C  | -1.4717854 | -2.6120111 | -0.3318178 |
| C  | -2.3489125 | -3.6221197 | -0.9665920 |
| N  | -0.8037669 | -1.5407086 | -0.9304079 |
| C  | 1.1362443  | -1.8808347 | 2.2124744  |
| C  | -1.3873825 | -0.6559236 | -2.0318194 |
| C  | -2.8679543 | -1.0075072 | -2.2616610 |
| C  | -0.5886814 | -0.8639645 | -3.3263924 |
| C  | -1.3690520 | 0.8145037  | -1.5729230 |
| C  | 1.2059114  | -0.4036484 | 2.6415899  |
| C  | 2.5144829  | -2.4620554 | 1.8589617  |
| C  | 0.5614512  | -2.6549313 | 3.4085917  |
| H  | -1.0112791 | -0.2308330 | -4.1197437 |
| H  | -0.6444988 | -1.9121072 | -3.6485035 |
| H  | 0.4631830  | -0.5898651 | -3.1791234 |
| H  | -1.8285082 | 1.4232642  | -2.3635252 |
| H  | -0.3554433 | 1.1857481  | -1.3929161 |
| H  | -1.9633708 | 0.9402842  | -0.6563121 |
| H  | 1.6098251  | 0.2397025  | 1.8535825  |
| H  | 1.8585877  | -0.3309159 | 3.5221082  |
| H  | 0.2080307  | -0.0388601 | 2.9262687  |
| H  | 2.9793674  | -1.9063987 | 1.0367425  |
| H  | 2.4179115  | -3.5183828 | 1.5734750  |
| H  | 3.1666129  | -2.4009376 | 2.7417164  |
| H  | 0.6211221  | -3.7415741 | 3.2922031  |
| H  | -0.4723236 | -2.3594708 | 3.6356336  |
| H  | 1.1686237  | -2.3893223 | 4.2837449  |
| H  | -3.2873292 | -0.2364783 | -2.9210826 |
| H  | -3.4441702 | -0.9882683 | -1.3263568 |
| H  | -3.0093381 | -1.9710771 | -2.7581614 |
| Se | 1.7167711  | -0.1493986 | -0.6793829 |
| O  | -3.2582565 | -4.1956906 | -0.3893810 |
| C  | -2.7170907 | -4.9718418 | -2.8732981 |
| O  | -0.2495084 | -5.0927945 | 1.4647086  |
| O  | -2.0681668 | -4.3096235 | 2.4691808  |
| O  | -1.9515698 | -3.9243359 | -2.2297275 |
| H  | -2.2721945 | -5.0839854 | -3.8666221 |
| H  | -3.7742581 | -4.6852968 | -2.9494895 |
| H  | -2.6367042 | -5.9050885 | -2.3025652 |
| C  | -3.0513015 | -3.2605430 | 2.6201513  |
| H  | -3.5789099 | -3.4940663 | 3.5508326  |
| H  | -3.7399118 | -3.2841417 | 1.7669223  |
| H  | -2.5766512 | -2.2728520 | 2.6988628  |

Selenourea  $R_1=C(CH_3)_3$   $R_2=F$

34

Energy = -3141.3286640760

|   |            |            |           |
|---|------------|------------|-----------|
| C | -0.4502524 | -0.8747477 | 0.3641309 |
| N | 0.3116571  | -1.7792104 | 1.1112885 |

|    |            |            |            |
|----|------------|------------|------------|
| C  | 0.3965560  | -2.9604830 | 0.3841862  |
| F  | 1.0343383  | -4.0677639 | 0.7667369  |
| C  | -0.2789526 | -2.8089751 | -0.7747983 |
| F  | -0.4217530 | -3.7442574 | -1.7141262 |
| N  | -0.8126910 | -1.5269879 | -0.8188416 |
| C  | 0.9411920  | -1.5183883 | 2.4775811  |
| C  | -1.6293644 | -0.9330858 | -1.9639166 |
| C  | -3.0285956 | -0.5722034 | -1.4394211 |
| C  | -1.8049224 | -1.9480498 | -3.1062275 |
| C  | -0.8759548 | 0.2813556  | -2.5314845 |
| C  | 1.9375298  | -0.3551739 | 2.3484851  |
| C  | 1.7197554  | -2.7483848 | 2.9730723  |
| C  | -0.1785043 | -1.2304712 | 3.4908209  |
| H  | -2.3932078 | -1.4410342 | -3.8825016 |
| H  | -2.3602269 | -2.8425989 | -2.7994878 |
| H  | -0.8519383 | -2.2512448 | -3.5567589 |
| H  | -1.4697598 | 0.7109779  | -3.3504607 |
| H  | 0.0969536  | -0.0280228 | -2.9395221 |
| H  | -0.7185581 | 1.0516568  | -1.7682343 |
| H  | 2.7470273  | -0.6184044 | 1.6527601  |
| H  | 2.3827851  | -0.1624940 | 3.3347091  |
| H  | 1.4452614  | 0.5592996  | 1.9989691  |
| H  | 2.5516266  | -3.0196366 | 2.3118344  |
| H  | 1.0796314  | -3.6258735 | 3.1255463  |
| H  | 2.1455228  | -2.4740932 | 3.9474345  |
| H  | -0.8507362 | -2.0964821 | 3.5760855  |
| H  | -0.7631105 | -0.3489202 | 3.2035347  |
| H  | 0.2749523  | -1.0500297 | 4.4755825  |
| H  | -3.6118370 | -0.1390250 | -2.2642398 |
| H  | -2.9767549 | 0.1570082  | -0.6225326 |
| H  | -3.5504857 | -1.4736725 | -1.0872341 |
| Se | -0.9029433 | 0.8551963  | 0.8526997  |

Selenourea  $R_1=C(CH_3)_3$   $R_2=C_6H_5$

54

Energy = -3405.0462421510

|   |            |            |            |
|---|------------|------------|------------|
| C | -0.6873547 | -1.1260042 | 0.7748788  |
| N | -0.1721490 | -2.0426526 | 1.6865279  |
| C | -0.2685679 | -3.3314859 | 1.1361144  |
| C | -0.2082039 | -4.6207678 | 1.8691197  |
| C | -0.7554682 | -3.2058425 | -0.1418058 |
| C | -1.3027439 | -4.3351539 | -0.9319655 |
| N | -0.9582497 | -1.8374311 | -0.3892257 |
| C | 0.5551667  | -1.6538730 | 2.9729311  |
| C | -1.2095698 | -1.1909886 | -1.7503570 |
| C | -2.6288381 | -0.6009598 | -1.7834257 |
| C | -1.0711859 | -2.2089651 | -2.8931549 |
| C | -0.1309778 | -0.1197431 | -2.0061236 |
| C | 1.6097770  | -0.5780630 | 2.6455107  |
| C | 1.3294181  | -2.8403140 | 3.5671931  |
| C | -0.4690356 | -1.1666239 | 4.0106343  |
| H | -1.1122491 | -1.6372695 | -3.8303492 |

|    |            |            |            |
|----|------------|------------|------------|
| H  | -1.8781105 | -2.9472489 | -2.9201717 |
| H  | -0.1082269 | -2.7355432 | -2.8670132 |
| H  | -0.3221363 | 0.3360727  | -2.9874718 |
| H  | 0.8662662  | -0.5826333 | -2.0327725 |
| H  | -0.1404944 | 0.6704942  | -1.2479054 |
| H  | 2.3500205  | -0.9761780 | 1.9356582  |
| H  | 2.1343950  | -0.3130065 | 3.5740815  |
| H  | 1.1617697  | 0.3287547  | 2.2265587  |
| H  | 2.0231616  | -3.2886478 | 2.8434526  |
| H  | 0.6827769  | -3.6244665 | 3.9719753  |
| H  | 1.9278073  | -2.4412293 | 4.3977174  |
| H  | -1.1600019 | -1.9781460 | 4.2803781  |
| H  | -1.0438656 | -0.3153624 | 3.6266398  |
| H  | 0.0623468  | -0.8541834 | 4.9215221  |
| H  | -2.7968740 | -0.1208896 | -2.7583463 |
| H  | -2.7619732 | 0.1467996  | -0.9924037 |
| H  | -3.3792766 | -1.3949205 | -1.6614816 |
| Se | -1.1234160 | 0.6481242  | 1.1115916  |
| C  | -2.6958583 | -4.5118289 | -1.0162838 |
| C  | -0.4682976 | -5.2905634 | -1.5307697 |
| C  | -3.2364404 | -5.6028565 | -1.6970143 |
| C  | -1.0091301 | -6.3858194 | -2.2083096 |
| C  | -2.3938402 | -6.5434697 | -2.2978724 |
| H  | 0.6133955  | -5.1631937 | -1.4770995 |
| H  | -0.3444712 | -7.1175143 | -2.6701508 |
| H  | -2.8160488 | -7.3977796 | -2.8287565 |
| H  | -4.3194140 | -5.7246588 | -1.7505713 |
| H  | -3.3558651 | -3.7886576 | -0.5346878 |
| C  | -1.2230637 | -4.9497207 | 2.7854840  |
| C  | -1.2256707 | -6.1855329 | 3.4336601  |
| C  | 0.7920984  | -5.5689346 | 1.6070110  |
| C  | 0.7894624  | -6.8072763 | 2.2540054  |
| C  | -0.2169983 | -7.1181577 | 3.1715111  |
| H  | -2.0234105 | -6.4250513 | 4.1384043  |
| H  | -0.2201154 | -8.0853143 | 3.6761924  |
| H  | -2.0182753 | -4.2288417 | 2.9819980  |
| H  | 1.5863592  | -5.3237991 | 0.9009751  |
| H  | 1.5774870  | -7.5310415 | 2.0404623  |

*Selenourea*  $R_1=C(CH_3)_3$   $R_2=OH$

36

Energy = -3093.2877169530

|   |            |            |            |
|---|------------|------------|------------|
| C | -0.4036268 | -0.8584204 | 0.3249619  |
| N | 0.2540746  | -1.8055124 | 1.1247757  |
| C | 0.1946109  | -3.0287323 | 0.4734115  |
| O | 0.8296657  | -4.1636333 | 0.8714914  |
| C | -0.4916162 | -2.8793196 | -0.6883462 |
| O | -0.4563001 | -3.8470711 | -1.6637865 |
| N | -0.8562547 | -1.5255200 | -0.8063316 |
| C | 0.8377910  | -1.5431932 | 2.5102197  |

|    |            |            |            |
|----|------------|------------|------------|
| C  | -1.7183580 | -0.9250149 | -1.9036485 |
| C  | -3.0173066 | -0.3691459 | -1.2943883 |
| C  | -2.1257278 | -1.9910217 | -2.9360208 |
| C  | -0.9055693 | 0.1530756  | -2.6400061 |
| C  | 1.9796911  | -0.5212883 | 2.3849143  |
| C  | 1.4265248  | -2.8239265 | 3.1252767  |
| C  | -0.2895566 | -1.0652802 | 3.4417015  |
| H  | -2.7510835 | -1.4859497 | -3.6842180 |
| H  | -2.7528650 | -2.7815585 | -2.4927045 |
| H  | -1.2698099 | -2.4350023 | -3.4561695 |
| H  | -1.5287109 | 0.5978703  | -3.4291326 |
| H  | -0.0173073 | -0.2918564 | -3.1108369 |
| H  | -0.5882185 | 0.9444243  | -1.9508377 |
| H  | 2.7786075  | -0.9209147 | 1.7435969  |
| H  | 2.4018317  | -0.3392964 | 3.3835463  |
| H  | 1.6275670  | 0.4295747  | 1.9702143  |
| H  | 2.2718934  | -3.2200268 | 2.5516769  |
| H  | 0.6789336  | -3.6164577 | 3.2489468  |
| H  | 1.7925899  | -2.5478115 | 4.1232612  |
| H  | -1.0503031 | -1.8522040 | 3.5516722  |
| H  | -0.7668514 | -0.1525521 | 3.0665091  |
| H  | 0.1345984  | -0.8586314 | 4.4343938  |
| H  | -3.6301502 | 0.0605569  | -2.0995776 |
| H  | -2.8134996 | 0.4091376  | -0.5508941 |
| H  | -3.5925781 | -1.1768213 | -0.8183291 |
| Se | -0.6164430 | 0.9490562  | 0.7033412  |
| H  | -1.3579414 | -4.1513998 | -1.8744374 |
| H  | 0.7160382  | -4.7914532 | 0.1292237  |

*Selenourea*  $R_1=C(CH_3)_3$   $R_2=SH$

36

|          |                  |            |            |
|----------|------------------|------------|------------|
| Energy = | -3739.2689767830 |            |            |
| C        | -0.5843223       | -0.8682795 | 0.4169023  |
| N        | 0.0907828        | -1.8187180 | 1.2013575  |
| C        | -0.0419504       | -3.0639949 | 0.5998858  |
| S        | 0.3968466        | -4.6324892 | 1.2782479  |
| C        | -0.7079660       | -2.8948365 | -0.5999161 |
| S        | -1.1672078       | -4.2428660 | -1.6208140 |
| N        | -1.0011631       | -1.5167271 | -0.7336055 |
| C        | 0.9017978        | -1.4690685 | 2.4539931  |
| C        | -1.5966826       | -0.7920523 | -1.9462745 |
| C        | -3.0088809       | -0.3010486 | -1.5843516 |
| C        | -1.7194085       | -1.6914703 | -3.1855179 |
| C        | -0.6472467       | 0.3497386  | -2.3589679 |

|    |            |            |            |
|----|------------|------------|------------|
| C  | 1.9134900  | -0.3637890 | 2.0954623  |
| C  | 1.7310723  | -2.6620836 | 2.9489333  |
| C  | -0.0591983 | -1.0661159 | 3.5851256  |
| H  | -2.0249767 | -1.0302124 | -4.0084210 |
| H  | -2.4819594 | -2.4701484 | -3.0865046 |
| H  | -0.7686791 | -2.1585603 | -3.4709313 |
| H  | -1.1065256 | 0.8958924  | -3.1946591 |
| H  | 0.3113814  | -0.0622514 | -2.7058603 |
| H  | -0.4635316 | 1.0579776  | -1.5453385 |
| H  | 2.6188427  | -0.7278993 | 1.3342687  |
| H  | 2.4859588  | -0.1114457 | 2.9987988  |
| H  | 1.4238250  | 0.5441992  | 1.7293137  |
| H  | 2.4002711  | -3.0667502 | 2.1788498  |
| H  | 1.1150947  | -3.4680797 | 3.3665482  |
| H  | 2.3613638  | -2.2875436 | 3.7667857  |
| H  | -0.7364761 | -1.8985044 | 3.8235989  |
| H  | -0.6522845 | -0.1858262 | 3.3150080  |
| H  | 0.5300035  | -0.8363781 | 4.4847845  |
| H  | -3.4342157 | 0.2316913  | -2.4469876 |
| H  | -2.9900992 | 0.3782650  | -0.7246198 |
| H  | -3.6621173 | -1.1557483 | -1.3556254 |
| Se | -0.9780091 | 0.8740223  | 0.9229653  |
| H  | -2.4413322 | -4.4284296 | -1.1703193 |
| H  | -0.2090875 | -5.2521595 | 0.2188650  |

*Selenourea*  $R_1=C(CH_3)_3$   $R_2=I$

34

|          |                  |            |            |
|----------|------------------|------------|------------|
| Energy = | -3537.2573616940 |            |            |
| C        | -0.7998861       | -0.9693446 | 0.5550203  |
| N        | -0.0489861       | -1.8823308 | 1.2961319  |
| C        | -0.2155021       | -3.1471079 | 0.7178013  |
| I        | -0.0960373       | -4.9916127 | 1.7190137  |
| C        | -0.9111972       | -2.9889520 | -0.4567808 |
| I        | -1.9169291       | -4.5788883 | -1.3939634 |
| N        | -1.1870789       | -1.6257646 | -0.6162970 |
| C        | 0.9527156        | -1.4863242 | 2.3872383  |
| C        | -1.5695801       | -0.8918862 | -1.9083638 |
| C        | -3.0381207       | -0.4517736 | -1.8167663 |
| C        | -1.3774074       | -1.7947000 | -3.1377802 |
| C        | -0.6184172       | 0.3026983  | -2.1114655 |
| C        | 1.6872214        | -0.1936941 | 1.9836930  |
| C        | 2.0499246        | -2.5559508 | 2.5310833  |
| C        | 0.1963997        | -1.3213179 | 3.7131334  |
| H        | -1.4224990       | -1.1457667 | -4.0226072 |

|    |            |            |            |
|----|------------|------------|------------|
| H  | -2.1603864 | -2.5505710 | -3.2441180 |
| H  | -0.3979435 | -2.2918500 | -3.1385328 |
| H  | -0.9040154 | 0.8110802  | -3.0424911 |
| H  | 0.4185920  | -0.0473873 | -2.2197658 |
| H  | -0.6684468 | 1.0287436  | -1.2943945 |
| H  | 2.2342569  | -0.3380519 | 1.0405343  |
| H  | 2.4195664  | 0.0337705  | 2.7699760  |
| H  | 1.0162276  | 0.6633801  | 1.8784755  |
| H  | 2.4647927  | -2.8491615 | 1.5565731  |
| H  | 1.7148762  | -3.4533002 | 3.0576547  |
| H  | 2.8632657  | -2.1117919 | 3.1198098  |
| H  | -0.2998408 | -2.2603998 | 3.9962452  |
| H  | -0.5575448 | -0.5280156 | 3.6326814  |
| H  | 0.9068124  | -1.0553411 | 4.5086727  |
| H  | -3.3185739 | 0.0687127  | -2.7439874 |
| H  | -3.1907994 | 0.2262759  | -0.9685422 |
| H  | -3.6959650 | -1.3248341 | -1.7014809 |
| Se | -1.3952741 | 0.6772474  | 1.1292691  |

Selenourea  $R_1=C(CH_3)_3$   $R_2=NH_2$

38

Energy = -3053.5342665690

|   |            |            |            |
|---|------------|------------|------------|
| C | 0.2146881  | -1.1754325 | 0.0205619  |
| N | 0.1955861  | -1.9192731 | 1.1871118  |
| C | -0.8944595 | -2.8271836 | 1.1200643  |
| N | -1.3530157 | -3.8015615 | 2.0254944  |
| C | -1.5452763 | -2.6022938 | -0.0619550 |
| N | -2.7642911 | -3.2112760 | -0.3768458 |
| N | -0.8798156 | -1.5918961 | -0.7525572 |
| C | 1.1899884  | -1.7603936 | 2.3269238  |
| C | -1.2363520 | -1.0205803 | -2.1216659 |
| C | -2.4800936 | -1.6961846 | -2.7247981 |
| C | -0.0766245 | -1.2749772 | -3.1016510 |
| C | -1.5695777 | 0.4734415  | -1.9635822 |
| C | 1.1049305  | -0.3232138 | 2.8736324  |
| C | 2.5984632  | -2.1193424 | 1.8210533  |
| C | 0.8879113  | -2.6948919 | 3.5113161  |
| H | -0.3629065 | -0.8933965 | -4.0924794 |
| H | 0.1129381  | -2.3549399 | -3.1940783 |
| H | 0.8449790  | -0.7775352 | -2.7807227 |
| H | -1.7956522 | 0.8962809  | -2.9529655 |
| H | -0.7294289 | 1.0269306  | -1.5288619 |
| H | -2.4561158 | 0.5986070  | -1.3253427 |
| H | 1.3083841  | 0.4164730  | 2.0914508  |

|    |            |            |            |
|----|------------|------------|------------|
| H  | 1.8457300  | -0.2014846 | 3.6768416  |
| H  | 0.1067037  | -0.1345344 | 3.2957821  |
| H  | 2.9004749  | -1.4721576 | 0.9894329  |
| H  | 2.6286832  | -3.1681904 | 1.4898441  |
| H  | 3.3171655  | -1.9990883 | 2.6445561  |
| H  | 0.9767327  | -3.7592107 | 3.2587629  |
| H  | -0.0890657 | -2.5026914 | 3.9731228  |
| H  | 1.6505872  | -2.4816487 | 4.2730096  |
| H  | -2.6809991 | -1.1851644 | -3.6758342 |
| H  | -3.3693735 | -1.6039438 | -2.0923216 |
| H  | -2.3037080 | -2.7538453 | -2.9727596 |
| Se | 1.4617291  | 0.1282639  | -0.4536560 |
| H  | -2.7962728 | -3.6617068 | -1.2897318 |
| H  | -2.9377062 | -3.9029410 | 0.3596045  |
| H  | -1.6855624 | -3.4340506 | 2.9169117  |
| H  | -0.6887183 | -4.5525668 | 2.2108517  |

*Selenourea*  $R_1=C(CH_3)_3$   $R_2=NO_2$

38

Energy = -3351.9879372020

|   |            |            |            |
|---|------------|------------|------------|
| C | 0.3942582  | -1.3391145 | -0.1409652 |
| N | 0.3152512  | -1.9928627 | 1.1144624  |
| C | -0.7170009 | -2.8959261 | 1.0440080  |
| N | -0.9306375 | -4.0259992 | 1.9732635  |
| C | -1.3266717 | -2.7950035 | -0.1811186 |
| N | -2.0251507 | -3.9154323 | -0.7754614 |
| N | -0.6995033 | -1.7704159 | -0.8839278 |
| C | 1.1712576  | -1.6543198 | 2.3454547  |
| C | -1.3327492 | -1.0052068 | -2.0641109 |
| C | -2.8111612 | -1.4099311 | -2.2069184 |
| C | -0.5537105 | -1.3354840 | -3.3424765 |
| C | -1.3261160 | 0.5025571  | -1.7568828 |
| C | 1.1078060  | -0.1355881 | 2.5859641  |
| C | 2.6018290  | -2.1603752 | 2.1070992  |
| C | 0.6071554  | -2.3264993 | 3.6054969  |
| H | -1.0124452 | -0.8040600 | -4.1883823 |
| H | -0.5875487 | -2.4125071 | -3.5471104 |
| H | 0.4917718  | -1.0156976 | -3.2546677 |
| H | -1.8120686 | 1.0133363  | -2.5989124 |
| H | -0.3184633 | 0.9129164  | -1.6447417 |
| H | -1.9057553 | 0.7190796  | -0.8480681 |
| H | 1.5093323  | 0.4394224  | 1.7458576  |
| H | 1.7051952  | 0.0914013  | 3.4793309  |
| H | 0.0727983  | 0.1809432  | 2.7795623  |

|    |            |            |            |
|----|------------|------------|------------|
| H  | 3.0614200  | -1.6738182 | 1.2401945  |
| H  | 2.6046261  | -3.2482574 | 1.9539011  |
| H  | 3.2061832  | -1.9379399 | 2.9974549  |
| H  | 0.7399849  | -3.4142112 | 3.6132850  |
| H  | -0.4469492 | -2.0752328 | 3.7797331  |
| H  | 1.1809424  | -1.9324834 | 4.4537862  |
| H  | -3.2745692 | -0.7011203 | -2.9050311 |
| H  | -3.3511753 | -1.3248851 | -1.2531943 |
| H  | -2.9467686 | -2.4128555 | -2.6185445 |
| Se | 1.7635403  | -0.2837712 | -0.7354012 |
| O  | -2.7766424 | -4.5591038 | -0.0325066 |
| O  | -0.1295108 | -4.9559294 | 1.8730935  |
| O  | -1.8716370 | -3.9431321 | 2.7516472  |
| O  | -1.7857072 | -4.1786331 | -1.9610731 |

Selenourea  $R_1=C(CH_3)_3$   $R_2=OCH_3$

42

|          |                  |            |            |
|----------|------------------|------------|------------|
| Energy = | -3171.8994369900 |            |            |
| C        | -0.6791149       | -0.7962069 | 0.3808553  |
| N        | -0.0290828       | -1.7254671 | 1.1877326  |
| C        | -0.2867579       | -3.0080930 | 0.6776588  |
| O        | 0.0753202        | -4.1316446 | 1.3479616  |
| C        | -0.9544774       | -2.8713080 | -0.5034124 |
| O        | -1.4177264       | -3.8830937 | -1.2830074 |
| N        | -1.1421352       | -1.4917189 | -0.7347847 |
| C        | 0.8619938        | -1.4884231 | 2.3987413  |
| C        | -1.5105387       | -0.8466710 | -2.0653093 |
| C        | -2.9231571       | -0.2457302 | -1.9779394 |
| C        | -1.4629902       | -1.8715379 | -3.2130672 |
| C        | -0.4611430       | 0.2273510  | -2.4118041 |
| C        | 1.4369469        | -0.0635858 | 2.4440255  |
| C        | 2.0872383        | -2.4278070 | 2.3097946  |
| C        | 0.0322837        | -1.7621097 | 3.6626038  |
| H        | -1.5753574       | -1.3043349 | -4.1469776 |
| H        | -2.2742398       | -2.6055054 | -3.1798501 |
| H        | -0.5051817       | -2.4048541 | -3.2552932 |
| H        | -0.7359427       | 0.6819347  | -3.3737901 |
| H        | 0.5330530        | -0.2295113 | -2.5198155 |
| H        | -0.4138004       | 1.0172462  | -1.6539475 |
| H        | 1.9402715        | 0.1984482  | 1.5035821  |
| H        | 2.1865744        | -0.0481568 | 3.2492996  |
| H        | 0.6777205        | 0.6954314  | 2.6427364  |
| H        | 2.6105953        | -2.2865621 | 1.3535509  |



|    |            |            |            |
|----|------------|------------|------------|
| H  | 1.8344992  | -3.4844705 | 2.4182740  |
| H  | 2.7820540  | -2.1536551 | 3.1142805  |
| H  | -0.3260370 | -2.7998943 | 3.6871291  |
| H  | -0.8295395 | -1.0824235 | 3.7047529  |
| H  | 0.6507999  | -1.5927331 | 4.5555867  |
| H  | -3.1744305 | 0.2308086  | -2.9367373 |
| H  | -2.9744204 | 0.5051174  | -1.1792539 |
| H  | -3.6721500 | -1.0265109 | -1.7803166 |
| Se | -1.1430255 | 0.9476746  | 0.8210042  |
| C  | -2.8383032 | -4.1404554 | -1.1788172 |
| C  | -0.9486603 | -5.1238176 | 1.5518807  |
| H  | -3.0387142 | -5.0035169 | -1.8240209 |
| H  | -3.4272959 | -3.2775786 | -1.5230955 |
| H  | -3.1153027 | -4.3738732 | -0.1399722 |
| H  | -0.5225039 | -5.8495023 | 2.2544872  |
| H  | -1.2005167 | -5.6300788 | 0.6098941  |
| H  | -1.8492253 | -4.6666306 | 1.9906003  |

Selenourea  $R_1=C(CH_3)_3$   $R_2=COCH_3$

44

|          |                  |            |            |
|----------|------------------|------------|------------|
| Energy = | -3248.1857920420 |            |            |
| C        | 0.2412087        | -1.2787044 | -0.2597382 |
| N        | 0.2013838        | -2.0056819 | 0.9309909  |
| C        | -0.9124738       | -2.8439615 | 0.9145256  |
| C        | -1.0658490       | -4.1248697 | 1.7202553  |
| C        | -1.6055859       | -2.6024816 | -0.2520202 |
| C        | -2.5504538       | -3.6087165 | -0.8403475 |
| N        | -0.9218576       | -1.6024104 | -0.9522771 |
| C        | 1.1442221        | -1.7963773 | 2.1138042  |
| C        | -1.5475902       | -0.7368869 | -2.0461935 |
| C        | -3.0108967       | -1.1494123 | -2.2644315 |
| C        | -0.7669644       | -0.8928637 | -3.3602688 |
| C        | -1.5701111       | 0.7288295  | -1.5737847 |
| C        | 1.2120832        | -0.2936664 | 2.4488985  |
| C        | 2.5207848        | -2.3842462 | 1.7681533  |
| C        | 0.6004304        | -2.4891624 | 3.3734552  |
| H        | -1.2246619       | -0.2509147 | -4.1265784 |
| H        | -0.8015460       | -1.9293459 | -3.7244446 |
| H        | 0.2809418        | -0.5985342 | -3.2295823 |
| H        | -2.0516673       | 1.3373015  | -2.3516583 |
| H        | -0.5621049       | 1.1205950  | -1.3991209 |
| H        | -2.1587904       | 0.8248334  | -0.6502758 |
| H        | 1.6044668        | 0.3016266  | 1.6188297  |
| H        | 1.8742252        | -0.1645637 | 3.3159152  |

|    |            |            |            |
|----|------------|------------|------------|
| H  | 0.2153975  | 0.0832053  | 2.7213056  |
| H  | 2.9545980  | -1.8836520 | 0.8949077  |
| H  | 2.4340683  | -3.4599087 | 1.5634821  |
| H  | 3.1955686  | -2.2469495 | 2.6249096  |
| H  | 0.6737687  | -3.5793998 | 3.3349325  |
| H  | -0.4344797 | -2.1892620 | 3.5907523  |
| H  | 1.2151713  | -2.1514033 | 4.2179431  |
| H  | -3.4518883 | -0.4301845 | -2.9674681 |
| H  | -3.5962597 | -1.1103440 | -1.3364825 |
| H  | -3.1207443 | -2.1405932 | -2.7190746 |
| Se | 1.6225640  | -0.2291148 | -0.8858044 |
| O  | -3.5725676 | -3.9479886 | -0.2563663 |
| C  | -2.0889612 | -4.3336067 | -2.0922226 |
| O  | -0.2040843 | -4.9857151 | 1.6190610  |
| C  | -2.3040248 | -4.2885423 | 2.5562390  |
| H  | -1.3908281 | -3.7509352 | -2.7033961 |
| H  | -2.9545062 | -4.6578295 | -2.6831064 |
| H  | -1.5534171 | -5.2362724 | -1.7540214 |
| H  | -2.4026938 | -3.4489113 | 3.2603192  |
| H  | -2.2684739 | -5.2405400 | 3.0975427  |
| H  | -3.1869712 | -4.2461688 | 1.8997216  |

*NHC R<sub>2</sub>=H R<sub>1</sub>=SH*

11

|                           |            |           |            |
|---------------------------|------------|-----------|------------|
| Energy = -1022.7433313120 |            |           |            |
| C                         | 0.6796012  | 8.4964604 | 23.8696488 |
| N                         | 1.1389401  | 7.5517051 | 24.7602875 |
| C                         | 0.6173040  | 6.2642704 | 24.5496051 |
| H                         | 0.8744702  | 5.4187461 | 25.1760808 |
| C                         | -0.2035255 | 6.3714763 | 23.4772684 |
| H                         | -0.8167017 | 5.6392838 | 22.9655947 |
| N                         | -0.1430415 | 7.7192113 | 23.0849986 |
| S                         | 2.1966451  | 7.9352063 | 26.0635815 |
| S                         | -1.0719673 | 8.3624455 | 21.7857930 |
| H                         | 3.3610636  | 7.7345045 | 25.3938388 |
| H                         | -0.1362582 | 8.1934404 | 20.8158630 |

*NHC R<sub>2</sub>=H R<sub>1</sub>=Br*

9

|                           |            |           |            |
|---------------------------|------------|-----------|------------|
| Energy = -5373.8944113760 |            |           |            |
| C                         | 0.9013224  | 8.4422957 | 23.7648874 |
| N                         | 1.2870143  | 7.4523381 | 24.6106861 |
| C                         | 0.6852681  | 6.2127492 | 24.4005922 |
| H                         | 0.8941514  | 5.3322740 | 24.9956388 |
| C                         | -0.1515222 | 6.4089449 | 23.3426641 |
| H                         | -0.8233973 | 5.7351721 | 22.8251876 |

|    |            |           |            |
|----|------------|-----------|------------|
| N  | 0.0156166  | 7.7501885 | 23.0028073 |
| Br | 2.5376502  | 7.7251289 | 25.9794060 |
| Br | -0.9296237 | 8.5366585 | 21.5886604 |

*NHC R<sub>2</sub>=H R<sub>1</sub>=CCH*

13

Energy = -378.5861342800

|   |            |           |            |
|---|------------|-----------|------------|
| C | 0.8690647  | 8.1269328 | 23.8220202 |
| N | 1.1881973  | 7.1124954 | 24.7119359 |
| C | 0.5120077  | 5.8977536 | 24.4619128 |
| H | 0.6580205  | 5.0162936 | 25.0736009 |
| C | -0.2681796 | 6.1217676 | 23.3835162 |
| H | -0.9521659 | 5.4783311 | 22.8444197 |
| N | -0.0416949 | 7.4656304 | 23.0118443 |
| C | 2.0682142  | 7.2751917 | 25.7291054 |
| C | -0.6561504 | 8.0578767 | 21.9596295 |
| C | 2.8456636  | 7.3811034 | 26.6479685 |
| C | -1.2222268 | 8.5526713 | 21.0137532 |
| H | -1.7122676 | 9.0088055 | 20.1798770 |
| H | 3.5353870  | 7.4983869 | 27.4566565 |

*NHC R<sub>2</sub>=H R<sub>1</sub>=COOCH<sub>3</sub>*

21

Energy = -682.2424168926

|   |            |           |            |
|---|------------|-----------|------------|
| C | 0.6773145  | 8.1929302 | 23.6443299 |
| N | 1.0965035  | 7.0733646 | 24.3306947 |
| C | 0.3356411  | 5.9161271 | 24.0512578 |
| H | 0.5345753  | 4.9545220 | 24.5046712 |
| C | -0.6037986 | 6.2977634 | 23.1626377 |
| H | -1.3940202 | 5.7379078 | 22.6810696 |
| N | -0.3796308 | 7.6729380 | 22.9288525 |
| C | 2.2043018  | 7.1238578 | 25.2301109 |
| C | -1.1532483 | 8.4872134 | 22.0470822 |
| O | 2.4349200  | 5.8776856 | 25.7125410 |
| O | -2.1618310 | 7.7403829 | 21.5327488 |
| C | -3.0208350 | 8.4594310 | 20.6166327 |
| H | -3.7921291 | 7.7412605 | 20.3231152 |
| H | -2.4487814 | 8.7956467 | 19.7426536 |
| H | -3.4665350 | 9.3288816 | 21.1152198 |
| C | 3.5429366  | 5.8030362 | 26.6405377 |
| H | 3.6152624  | 4.7472558 | 26.9174324 |
| H | 3.3433741  | 6.4250669 | 27.5221121 |
| H | 4.4665416  | 6.1448171 | 26.1573258 |
| O | 2.8264902  | 8.1150430 | 25.5088831 |
| O | -0.9387318 | 9.6460983 | 21.8061914 |

*NHC R<sub>2</sub>=H R<sub>1</sub>=CHCH<sub>2</sub>*

17

Energy = -381.1274762042

|   |           |           |            |
|---|-----------|-----------|------------|
| C | 0.8725864 | 8.4223617 | 23.7642398 |
|---|-----------|-----------|------------|

|   |            |           |            |
|---|------------|-----------|------------|
| N | 1.3589521  | 7.3704961 | 24.5124173 |
| C | 0.6819082  | 6.1708759 | 24.2644037 |
| H | 0.9170046  | 5.2353681 | 24.7569362 |
| C | -0.2623314 | 6.4521181 | 23.3337197 |
| H | -0.9972344 | 5.8054315 | 22.8700720 |
| N | -0.1339923 | 7.8151441 | 23.0426225 |
| C | 2.4272001  | 7.5566767 | 25.4103662 |
| C | -0.9069387 | 8.5500974 | 22.1236124 |
| C | -1.8793678 | 8.0643220 | 21.3456863 |
| C | 2.9732066  | 6.6181772 | 26.1899842 |
| H | 2.7718292  | 8.5902223 | 25.3978273 |
| H | 2.6351498  | 5.5826900 | 26.2092863 |
| H | 3.7988962  | 6.8835770 | 26.8463506 |
| H | -0.6101930 | 9.5984390 | 22.1148010 |
| H | -2.1798729 | 7.0170537 | 21.3436041 |
| H | -2.4093826 | 8.7350792 | 20.6731003 |

*NHC*  $R_2=C_6H_5$   $R_1=H$

29

Energy = -688.5764019568

|   |            |           |            |
|---|------------|-----------|------------|
| C | 0.6248836  | 8.1816823 | 24.0439304 |
| N | 1.2120946  | 7.3665464 | 24.9699920 |
| C | 0.4209951  | 6.2952609 | 25.4058705 |
| C | -0.7700676 | 6.4351013 | 24.7211360 |
| N | -0.5905958 | 7.5698408 | 23.9186859 |
| H | 2.1751247  | 7.4924349 | 25.2613504 |
| H | -1.3282259 | 7.9553225 | 23.3397332 |
| H | 0.8680121  | 1.9333601 | 26.9689844 |
| C | 1.1114131  | 2.9884795 | 27.1045435 |
| H | 2.3262664  | 2.6471821 | 28.8630857 |
| C | 1.9329500  | 3.3867842 | 28.1645281 |
| H | -0.0083480 | 3.6087943 | 25.3687716 |
| C | 0.6118786  | 3.9297972 | 26.2060395 |
| C | 2.2498559  | 4.7388052 | 28.3186603 |
| C | 0.9146842  | 5.2973815 | 26.3556547 |
| C | 1.7443930  | 5.6854433 | 27.4265291 |
| H | 2.8866458  | 5.0615584 | 29.1436140 |
| H | 1.9736903  | 6.7424562 | 27.5760568 |
| H | -4.1671783 | 4.1483599 | 26.9309233 |
| C | -3.7725361 | 4.5166211 | 25.9825033 |
| H | -5.4437746 | 3.7830982 | 24.8188931 |
| C | -4.4919716 | 4.3155586 | 24.7995814 |
| H | -2.0155091 | 5.3772390 | 26.8911328 |
| C | -2.5588602 | 5.2015909 | 25.9624107 |
| C | -3.9842942 | 4.8057341 | 23.5937061 |
| C | -2.0303012 | 5.6910700 | 24.7522971 |
| C | -2.7652286 | 5.4847407 | 23.5680946 |
| H | -4.5349749 | 4.6513945 | 22.6646449 |
| H | -2.3638912 | 5.8366920 | 22.6156166 |

*NHC*  $R_2=Br$   $R_1=H$

9

Energy = -5373.9659470950

|    |            |           |            |
|----|------------|-----------|------------|
| C  | 1.0356301  | 8.8496208 | 23.7341571 |
| N  | 1.6266388  | 7.8049941 | 24.3955171 |
| C  | 0.9513454  | 6.5991028 | 24.2565992 |
| Br | 1.4964344  | 4.9877212 | 25.0354293 |
| C  | -0.1312311 | 6.8720665 | 23.4662184 |
| Br | -1.4877286 | 5.7392478 | 22.8520532 |
| N  | -0.0485214 | 8.2269778 | 23.1728842 |
| H  | 2.4786303  | 7.9121538 | 24.9346242 |
| H  | -0.7234879 | 8.7191351 | 22.5981775 |

*NHC*  $R_2=CCH$   $R_1=H$

13

Energy = -378.6403671320

|   |            |           |            |
|---|------------|-----------|------------|
| C | 0.9638789  | 8.5868512 | 23.7693967 |
| N | 1.4718402  | 7.5688493 | 24.5238730 |
| C | 0.8235207  | 6.3360578 | 24.3577321 |
| C | 1.1755574  | 5.1560609 | 25.0292762 |
| C | -0.1748476 | 6.5821861 | 23.4282552 |
| C | -1.1381431 | 5.7250255 | 22.8760046 |
| N | -0.0439626 | 7.9424309 | 23.1115819 |
| H | 2.2559317  | 7.6945756 | 25.1546303 |
| H | -0.6487990 | 8.4107431 | 22.4456384 |
| C | 1.5008427  | 4.1484488 | 25.6256519 |
| C | -1.9805609 | 4.9996424 | 22.3847533 |
| H | -2.7169790 | 4.3500300 | 21.9593692 |
| H | 1.7772907  | 3.2536083 | 26.1437970 |

*NHC*  $R_2=COOCH_3$   $R_1=H$

21

Energy = -682.2503370271

|   |            |           |            |
|---|------------|-----------|------------|
| C | 0.9611350  | 8.4186177 | 23.7138408 |
| N | 1.4136809  | 7.3840022 | 24.4730785 |
| C | 0.8840239  | 6.1388712 | 24.1398563 |
| C | 0.0229072  | 6.3808869 | 23.0889791 |
| N | 0.1120929  | 7.7496270 | 22.8654115 |
| H | 2.1093308  | 7.4831893 | 25.2075371 |
| H | -0.3919823 | 8.2151405 | 22.1169500 |
| C | 1.3928888  | 4.9390952 | 24.8101132 |
| C | -0.7742950 | 5.5296707 | 22.1597571 |
| O | -1.7265987 | 4.7025808 | 22.6511162 |
| O | 0.8952102  | 3.7938966 | 24.2801471 |
| C | 1.4056785  | 2.5723268 | 24.8682372 |
| H | 2.4943427  | 2.5177960 | 24.7435613 |
| H | 0.9118420  | 1.7632001 | 24.3222340 |
| H | 1.1619973  | 2.5300316 | 25.9374936 |
| C | -2.1563249 | 4.7808774 | 24.0293164 |
| H | -3.1680747 | 4.3615619 | 24.0378931 |
| H | -2.1842084 | 5.8200284 | 24.3820594 |
| H | -1.4986389 | 4.1807649 | 24.6688356 |
| O | -0.6078641 | 5.6130299 | 20.9591414 |

O 2.1971970 4.9833649 25.7279811

*NHC*  $R_2=CH_2CH_3$   $R_1=H$

21

Energy = -383.5986467489

|   |            |           |            |
|---|------------|-----------|------------|
| C | 0.9437373  | 8.7429040 | 23.7543326 |
| N | 1.0756278  | 7.7885402 | 24.7229421 |
| C | 0.4207401  | 6.5742925 | 24.4599424 |
| C | 0.5053828  | 5.4327941 | 25.4256897 |
| C | -0.1725820 | 6.7526896 | 23.2353447 |
| C | -1.0133083 | 5.9118368 | 22.3202551 |
| N | 0.1709922  | 8.0596588 | 22.8571137 |
| H | 1.5989906  | 7.9640637 | 25.5727243 |
| H | -0.1355356 | 8.4852143 | 21.9896251 |
| C | -1.5005968 | 4.5675129 | 22.8653526 |
| H | -0.4505901 | 5.7344431 | 21.3856633 |
| H | -1.8930085 | 6.5095122 | 22.0205472 |
| H | -0.6644041 | 3.8976306 | 23.1078345 |
| H | -2.1200591 | 4.0608015 | 22.1125171 |
| H | -2.1133157 | 4.6955786 | 23.7685869 |
| C | 1.8696047  | 4.7178724 | 25.4298736 |
| H | -0.2870776 | 4.7076499 | 25.2068411 |
| H | 0.2941261  | 5.8108125 | 26.4413508 |
| H | 2.0873337  | 4.2782292 | 24.4464970 |
| H | 1.8832066  | 3.9114856 | 26.1774387 |
| H | 2.6884458  | 5.4109075 | 25.6693676 |

*NHC*  $R_2=I$   $R_1=H$

9

Energy = -820.7920343634

|   |            |           |            |
|---|------------|-----------|------------|
| C | 1.0300194  | 8.8563058 | 23.7370918 |
| N | 1.6067102  | 7.8160982 | 24.4148828 |
| C | 0.9346655  | 6.6072640 | 24.2682812 |
| I | 1.5210872  | 4.8247131 | 25.1508398 |
| C | -0.1340281 | 6.8780492 | 23.4523545 |
| I | -1.6246813 | 5.6215087 | 22.7457707 |
| N | -0.0418660 | 8.2337723 | 23.1560838 |
| H | 2.4474375  | 7.9294902 | 24.9700778 |
| H | -0.7014745 | 8.7272085 | 22.5650974 |

*NHC*  $R_2=COCH_3$ (carbonyl)  $R_1=H$

19

Energy = -531.7189743587

|   |            |           |            |
|---|------------|-----------|------------|
| C | 1.0213690  | 8.5750784 | 23.8110208 |
| N | 1.5540940  | 7.5545183 | 24.5471033 |
| C | 0.9274827  | 6.3236906 | 24.4097039 |
| C | -0.1105997 | 6.5605438 | 23.5005785 |
| N | 0.0033019  | 7.9085890 | 23.1888103 |
| H | 2.3557827  | 7.6467594 | 25.1671194 |
| H | -0.6507794 | 8.3328827 | 22.5341145 |

|   |            |           |            |
|---|------------|-----------|------------|
| C | 1.5087875  | 5.2181012 | 25.2142025 |
| C | -1.2187793 | 5.8394998 | 22.8235133 |
| C | -1.4839386 | 4.3733410 | 23.0491867 |
| H | -0.6062701 | 3.7657039 | 22.7899119 |
| H | -2.3318767 | 4.0752550 | 22.4231161 |
| H | -1.7244972 | 4.1759698 | 24.1032507 |
| C | 0.9563840  | 3.8162653 | 25.1777922 |
| H | 1.0215346  | 3.3945077 | 24.1649209 |
| H | -0.1004434 | 3.7972488 | 25.4767449 |
| H | 1.5412464  | 3.1967400 | 25.8657369 |
| O | 2.4779066  | 5.4888875 | 25.9236686 |
| O | -1.9288349 | 6.4916979 | 22.0574547 |

*NHC*  $R_2=OCH_3$   $R_1=H$

17

|          |                 |           |            |
|----------|-----------------|-----------|------------|
| Energy = | -455.4213229514 |           |            |
| C        | 1.0719183       | 8.8046197 | 23.7569203 |
| N        | 1.4298001       | 7.8567598 | 24.6850072 |
| C        | 0.8536102       | 6.6063958 | 24.4819107 |
| O        | 1.0916644       | 5.5844222 | 25.3424987 |
| C        | 0.0720232       | 6.7394527 | 23.3635259 |
| O        | -0.6906612      | 5.8355159 | 22.6885391 |
| N        | 0.2386837       | 8.0698326 | 22.9568093 |
| H        | 2.0588857       | 8.0538376 | 25.4549293 |
| H        | -0.1838010      | 8.4530389 | 22.1183629 |
| C        | -2.0831763      | 5.8167594 | 23.0840593 |
| H        | -2.5691281      | 5.0624273 | 22.4544986 |
| H        | -2.5531603      | 6.7978863 | 22.9147313 |
| H        | -2.1824074      | 5.5419291 | 24.1451208 |
| C        | 1.4428899       | 4.3281164 | 24.7229512 |
| H        | 1.6430929       | 3.6340132 | 25.5466033 |
| H        | 2.3449309       | 4.4456307 | 24.1032004 |
| H        | 0.6193848       | 3.9466227 | 24.1030315 |

*NHC*  $R_2=SH$   $R_1=H$

11

|          |                  |           |            |
|----------|------------------|-----------|------------|
| Energy = | -1022.7936330280 |           |            |
| C        | 1.0830668        | 8.8438659 | 23.7601316 |
| N        | 1.6710517        | 7.8001890 | 24.4012247 |
| C        | 0.9936214        | 6.5747594 | 24.2682615 |
| S        | 1.5327975        | 5.0356555 | 24.8878703 |
| C        | -0.0956596       | 6.8607336 | 23.4764071 |
| S        | -1.3847554       | 5.8351989 | 22.8857986 |
| N        | -0.0098957       | 8.2177458 | 23.1970522 |
| H        | 2.5311344        | 7.8979823 | 24.9292986 |
| H        | -0.6788200       | 8.7245216 | 22.6285410 |
| H        | 0.9838292        | 5.1070533 | 26.1320986 |
| H        | -0.8554202       | 4.7192145 | 23.4513657 |

*NHC*  $R_2=H$   $R_1=OCH_3$

17

Energy = -455.3266059842

|   |            |           |            |
|---|------------|-----------|------------|
| C | 0.6932719  | 7.9255645 | 23.7609782 |
| N | 0.7242137  | 7.0217362 | 24.7693377 |
| C | 0.1964010  | 5.7763410 | 24.4797917 |
| H | 0.1560180  | 4.9654671 | 25.1961245 |
| C | -0.2208601 | 5.8742328 | 23.1786950 |
| H | -0.6920576 | 5.1632685 | 22.5116070 |
| N | 0.1037333  | 7.1664269 | 22.8067912 |
| O | 1.1624020  | 7.3034648 | 26.0682721 |
| O | -0.1022646 | 7.5775011 | 21.4847002 |
| C | -0.7373660 | 8.8700735 | 21.4408050 |
| H | -0.8230444 | 9.0895717 | 20.3702374 |
| H | -0.1173304 | 9.6244440 | 21.9426950 |
| H | -1.7353546 | 8.8300210 | 21.9050224 |
| C | 2.4607253  | 7.9286538 | 26.0476550 |
| H | 2.6831253  | 8.1210032 | 27.1036421 |
| H | 2.4292336  | 8.8689402 | 25.4818739 |
| H | 3.2130435  | 7.2504597 | 25.6149717 |

*NHC*  $R_2=H$   $R_1=COCH_3$

19

Energy = -531.7026730103

|   |            |           |            |
|---|------------|-----------|------------|
| C | 0.9333151  | 8.5202346 | 23.7544356 |
| N | 1.4720538  | 7.4396068 | 24.4225984 |
| C | 0.7301010  | 6.2516285 | 24.2459877 |
| H | 0.9914483  | 5.2991858 | 24.6901023 |
| C | -0.3114235 | 6.5737863 | 23.4509392 |
| H | -1.1147356 | 5.9501698 | 23.0789410 |
| N | -0.1724350 | 7.9480560 | 23.1595852 |
| C | 2.6805525  | 7.5514346 | 25.2155359 |
| C | -1.0835756 | 8.7171434 | 22.3343547 |
| C | -2.3121632 | 7.9671456 | 21.8680796 |
| H | -2.0391108 | 7.1121322 | 21.2323777 |
| H | -2.9325774 | 8.6587362 | 21.2909635 |
| H | -2.8893409 | 7.5802296 | 22.7204880 |
| C | 3.1837614  | 6.2508018 | 25.8020987 |
| H | 2.4544541  | 5.8282692 | 26.5092962 |
| H | 4.1180518  | 6.4577777 | 26.3319415 |
| H | 3.3645769  | 5.5009523 | 25.0184767 |
| O | -0.8554981 | 9.8685930 | 22.0599129 |
| O | 3.2232051  | 8.6155864 | 25.3782550 |

*HEP* complex  $R_1=Br$   $R_2=H$

45

Energy = -11267.0006294200

|   |            |            |            |
|---|------------|------------|------------|
| H | -2.4890804 | -5.3228989 | 2.9243477  |
| C | -2.8258497 | -5.7699663 | 1.9896764  |
| C | -4.1202246 | -5.5470794 | 1.5188359  |
| H | -4.7990018 | -4.9219717 | 2.0995210  |
| C | -4.5618640 | -6.1109142 | 0.3100269  |
| H | -5.5790968 | -5.9170583 | -0.0311996 |



|    |            |             |            |
|----|------------|-------------|------------|
| C  | -3.7259801 | -6.9149097  | -0.4660879 |
| H  | -4.0834418 | -7.3420731  | -1.4005932 |
| C  | -2.4282544 | -7.1458153  | 0.0035405  |
| C  | -1.9894851 | -6.5790432  | 1.2166831  |
| N  | -1.3494976 | -7.8818880  | -0.4866124 |
| N  | -0.6733412 | -7.0053540  | 1.4039050  |
| C  | -1.3141677 | -8.6563334  | -1.7481801 |
| C  | -1.4270702 | -7.7307443  | -2.9620597 |
| H  | -2.3952867 | -7.2126557  | -3.0019424 |
| H  | -0.6264107 | -6.9787362  | -2.9450635 |
| H  | -1.3246224 | -8.3214664  | -3.8829669 |
| C  | -2.3320969 | -9.7992813  | -1.7302088 |
| H  | -3.3696067 | -9.4383611  | -1.7113535 |
| H  | -2.2084690 | -10.4083935 | -2.6363402 |
| H  | -2.1656604 | -10.4444830 | -0.8575543 |
| C  | 0.1373937  | -6.5448158  | 2.5588549  |
| C  | 0.9539253  | -5.3051541  | 2.1794493  |
| H  | 1.6765604  | -5.5463112  | 1.3877956  |
| H  | 0.3044111  | -4.4961740  | 1.8166981  |
| H  | 1.4993488  | -4.9369086  | 3.0600999  |
| C  | 0.9876836  | -7.6571521  | 3.1623201  |
| H  | -0.6139711 | -6.2596237  | 3.3100162  |
| H  | 1.7904069  | -7.9621995  | 2.4765800  |
| H  | 1.4445735  | -7.2880379  | 4.0916528  |
| H  | 0.3896404  | -8.5488325  | 3.3898028  |
| C  | -0.2803531 | -7.7960865  | 0.3616991  |
| H  | -0.3045686 | -9.0977117  | -1.7423428 |
| Pd | 1.4724710  | -8.7649722  | 0.0147072  |
| Br | 2.4322913  | -6.7748597  | -1.1220085 |
| Br | 0.5214963  | -10.8326835 | 1.0194654  |
| C  | 3.1821036  | -9.7703297  | -0.3816474 |
| N  | 4.3879439  | -9.7298090  | 0.2556116  |
| N  | 3.4310849  | -10.6782231 | -1.3690674 |
| C  | 5.3428659  | -10.5701115 | -0.3034532 |
| Br | 4.7396875  | -8.6449470  | 1.7216229  |
| C  | 4.7257589  | -11.1814112 | -1.3509710 |
| H  | 6.3489606  | -10.6558985 | 0.0856206  |
| H  | 5.0820695  | -11.9107281 | -2.0664331 |
| Br | 2.1707839  | -11.1939214 | -2.6327071 |

HEP complex  $R_1=CCH$   $R_2=H$

49

Energy = -6271.6940358700

|   |            |            |            |
|---|------------|------------|------------|
| H | -2.1171206 | -5.0568189 | 2.5860744  |
| C | -2.5031250 | -5.6962118 | 1.7925923  |
| C | -3.8493930 | -5.6474096 | 1.4290581  |
| H | -4.5184371 | -4.9618816 | 1.9498030  |
| C | -4.3557836 | -6.4627935 | 0.4030728  |
| H | -5.4126937 | -6.4017733 | 0.1424009  |
| C | -3.5342546 | -7.3500573 | -0.2934059 |
| H | -3.9416865 | -7.9737522 | -1.0862864 |
| C | -2.1833083 | -7.4017057 | 0.0655834  |

|    |            |             |            |
|----|------------|-------------|------------|
| C  | -1.6797736 | -6.5867522  | 1.0996199  |
| N  | -1.0981237 | -8.1435616  | -0.4001056 |
| N  | -0.3202142 | -6.8834660  | 1.2145659  |
| C  | -1.1182079 | -9.1459256  | -1.4900576 |
| C  | -1.4670537 | -8.4968656  | -2.8314137 |
| H  | -2.4971026 | -8.1153495  | -2.8577128 |
| H  | -0.7792345 | -7.6686746  | -3.0473427 |
| H  | -1.3668597 | -9.2435216  | -3.6313872 |
| C  | -1.9936896 | -10.3452125 | -1.1218020 |
| H  | -3.0533096 | -10.0741220 | -1.0170821 |
| H  | -1.9208216 | -11.1052175 | -1.9124492 |
| H  | -1.6473315 | -10.7941133 | -0.1815572 |
| C  | 0.5646573  | -6.1631535  | 2.1637833  |
| C  | 1.2311439  | -4.9673963  | 1.4756310  |
| H  | 1.8955791  | -5.3082173  | 0.6691565  |
| H  | 0.4828546  | -4.2895051  | 1.0415923  |
| H  | 1.8223526  | -4.4015500  | 2.2100167  |
| C  | 1.5662252  | -7.0864930  | 2.8504051  |
| H  | -0.1250343 | -5.7899925  | 2.9360891  |
| H  | 2.3096008  | -7.4715633  | 2.1374475  |
| H  | 2.0936246  | -6.5162474  | 3.6284550  |
| H  | 1.0720341  | -7.9488718  | 3.3153006  |
| C  | 0.0353697  | -7.8271620  | 0.2940290  |
| H  | -0.0716903 | -9.4872327  | -1.5356709 |
| Pd | 1.8357760  | -8.6989513  | -0.0824906 |
| Br | 2.4147896  | -6.8931806  | -1.6907742 |
| Br | 1.2238974  | -10.6203481 | 1.3778704  |
| C  | 3.5810409  | -9.6042138  | -0.4703968 |
| N  | 4.8195648  | -9.3708805  | 0.0881748  |
| N  | 3.8314747  | -10.6395740 | -1.3442475 |
| C  | 5.8016799  | -10.2407058 | -0.4238680 |
| C  | 5.0776986  | -8.4232967  | 1.0192714  |
| C  | 5.1827278  | -11.0353387 | -1.3211115 |
| C  | 2.9000329  | -11.2199652 | -2.1367150 |
| H  | 5.5472665  | -11.8392820 | -1.9468110 |
| H  | 6.8291412  | -10.1936989 | -0.0883709 |
| C  | 5.3882132  | -7.6034172  | 1.8497489  |
| C  | 2.1364414  | -11.7878283 | -2.8802017 |
| H  | 1.4363481  | -12.2832647 | -3.5190398 |
| H  | 5.6326043  | -6.8639136  | 2.5826680  |

HEP complex  $R_1=CHCH_2$   $R_2=H$

53

Energy = -6274.2382135470

|   |            |            |            |
|---|------------|------------|------------|
| H | -2.0583782 | -5.0205704 | 2.5462728  |
| C | -2.4616652 | -5.6654116 | 1.7659980  |
| C | -3.8108835 | -5.6012541 | 1.4157479  |
| H | -4.4637688 | -4.8984853 | 1.9339656  |
| C | -4.3410326 | -6.4248085 | 0.4085012  |
| H | -5.3999184 | -6.3518096 | 0.1590348  |
| C | -3.5406557 | -7.3355951 | -0.2824411 |
| H | -3.9661846 | -7.9665931 | -1.0598954 |

|    |            |             |            |
|----|------------|-------------|------------|
| C  | -2.1870887 | -7.4027893  | 0.0637800  |
| C  | -1.6600524 | -6.5808510  | 1.0800838  |
| N  | -1.1189085 | -8.1710273  | -0.3991868 |
| N  | -0.3053413 | -6.9021138  | 1.1908492  |
| C  | -1.1624418 | -9.1786610  | -1.4829167 |
| C  | -1.5301553 | -8.5391196  | -2.8238449 |
| H  | -2.5657926 | -8.1733124  | -2.8450941 |
| H  | -0.8555346 | -7.7025693  | -3.0486382 |
| H  | -1.4236816 | -9.2879719  | -3.6210110 |
| C  | -2.0360614 | -10.3733002 | -1.0950226 |
| H  | -3.0908624 | -10.0938836 | -0.9664549 |
| H  | -1.9867067 | -11.1331241 | -1.8879742 |
| H  | -1.6741671 | -10.8221353 | -0.1603158 |
| C  | 0.6020208  | -6.1648993  | 2.1056217  |
| C  | 1.2792740  | -5.0067251  | 1.3652998  |
| H  | 1.9158717  | -5.3865140  | 0.5537272  |
| H  | 0.5362522  | -4.3263802  | 0.9260813  |
| H  | 1.8995128  | -4.4308754  | 2.0669639  |
| C  | 1.5941348  | -7.0764280  | 2.8211578  |
| H  | -0.0725225 | -5.7497903  | 2.8696180  |
| H  | 2.3102922  | -7.5213090  | 2.1144995  |
| H  | 2.1532781  | -6.4814090  | 3.5570690  |
| H  | 1.0887991  | -7.9015523  | 3.3381463  |
| C  | 0.0246660  | -7.8704043  | 0.2858243  |
| H  | -0.1165455 | -9.5195548  | -1.5460360 |
| Pd | 1.7918710  | -8.8269452  | -0.0448494 |
| Br | 2.4039308  | -7.1275660  | -1.7559724 |
| Br | 1.0430447  | -10.5840454 | 1.5596703  |
| C  | 3.5376743  | -9.8241483  | -0.3716804 |
| N  | 4.8104385  | -9.4142238  | -0.0584645 |
| N  | 3.7152856  | -11.0668292 | -0.9283217 |
| C  | 5.7500264  | -10.3851448 | -0.4061279 |
| C  | 5.1007609  | -8.1638158  | 0.5320771  |
| C  | 5.0654690  | -11.4164817 | -0.9538703 |
| C  | 2.6510873  | -11.8614422 | -1.4101336 |
| H  | 5.4167574  | -12.3613529 | -1.3458163 |
| H  | 6.8118074  | -10.2526434 | -0.2477998 |
| C  | 6.2685622  | -7.8382367  | 1.0914482  |
| C  | 2.7943113  | -12.9563137 | -2.1605029 |
| H  | 1.6846680  | -11.4863053 | -1.0761853 |
| H  | 3.7586251  | -13.3359160 | -2.4970618 |
| H  | 1.9093278  | -13.5119420 | -2.4625024 |
| H  | 4.2599603  | -7.4754417  | 0.4587275  |
| H  | 7.1100002  | -8.5257629  | 1.1727150  |
| H  | 6.4029296  | -6.8373952  | 1.4956403  |

HEP complex  $R_1=H$   $R_2=CH_2CH_3$

57

Energy = -6276.7324134610

|   |            |            |           |
|---|------------|------------|-----------|
| H | -2.5446462 | -5.5634673 | 3.0358155 |
| C | -2.8393003 | -5.9023878 | 2.0431902 |
| C | -4.0903370 | -5.5740103 | 1.5184155 |

|    |            |             |            |
|----|------------|-------------|------------|
| H  | -4.7786033 | -4.9741724  | 2.1145406  |
| C  | -4.4762670 | -5.9997146  | 0.2361064  |
| H  | -5.4601823 | -5.7256499  | -0.1453816 |
| C  | -3.6262431 | -6.7657548  | -0.5630674 |
| H  | -3.9398490 | -7.0864858  | -1.5544090 |
| C  | -2.3709599 | -7.0979872  | -0.0423927 |
| C  | -1.9889581 | -6.6721648  | 1.2459103  |
| N  | -1.2906867 | -7.8269988  | -0.5394727 |
| N  | -0.7038054 | -7.1714815  | 1.4667209  |
| C  | -1.1957785 | -8.4749263  | -1.8683685 |
| C  | -1.2283299 | -7.4377349  | -2.9932790 |
| H  | -2.1920121 | -6.9132183  | -3.0512307 |
| H  | -0.4320953 | -6.6945139  | -2.8542406 |
| H  | -1.0628763 | -7.9417490  | -3.9556545 |
| C  | -2.2282088 | -9.5940080  | -2.0191377 |
| H  | -3.2598501 | -9.2159905  | -2.0100452 |
| H  | -2.0681136 | -10.1076794 | -2.9773100 |
| H  | -2.1146651 | -10.3299552 | -1.2120763 |
| C  | 0.0586118  | -6.8472676  | 2.6987568  |
| C  | 0.8386833  | -5.5416075  | 2.5125583  |
| H  | 1.6086407  | -5.6625127  | 1.7377537  |
| H  | 0.1750269  | -4.7180238  | 2.2146127  |
| H  | 1.3273249  | -5.2633476  | 3.4572235  |
| C  | 0.9421349  | -7.9965831  | 3.1740001  |
| H  | -0.7217600 | -6.6923676  | 3.4596146  |
| H  | 1.7832867  | -8.1675667  | 2.4865455  |
| H  | 1.3500744  | -7.7380057  | 4.1617105  |
| H  | 0.3806491  | -8.9354130  | 3.2568000  |
| C  | -0.2741283 | -7.8693136  | 0.3745661  |
| H  | -0.1931490 | -8.9322608  | -1.8511191 |
| Pd | 1.4797974  | -8.8395904  | 0.0158163  |
| Br | 2.4580813  | -6.7320995  | -0.8834222 |
| Br | 0.4606528  | -10.9778771 | 0.8137484  |
| C  | 3.2014989  | -9.8285105  | -0.4165480 |
| N  | 4.3512535  | -9.3297362  | -0.9303026 |
| N  | 3.4571724  | -11.1508020 | -0.2883799 |
| C  | 5.3160194  | -10.3122735 | -1.1301445 |
| H  | 4.4132133  | -8.3317117  | -1.1481088 |
| C  | 4.7372399  | -11.4897993 | -0.7153643 |
| C  | 6.6823704  | -10.0366870 | -1.6923350 |
| C  | 5.2665443  | -12.8870266 | -0.6786101 |
| H  | 2.7285880  | -11.7671833 | 0.0844697  |
| H  | 6.2374359  | -12.8988370 | -1.1951911 |
| H  | 4.6028597  | -13.5465177 | -1.2637821 |
| C  | 5.4269656  | -13.4586726 | 0.7417498  |
| C  | 6.9168906  | -8.5775369  | -2.0978116 |
| H  | 6.8473155  | -10.6863849 | -2.5675727 |
| H  | 7.4449276  | -10.3323630 | -0.9527957 |
| H  | 6.2091354  | -8.2519526  | -2.8735191 |
| H  | 7.9303526  | -8.4542589  | -2.5015169 |
| H  | 6.8204815  | -7.8965022  | -1.2400752 |
| H  | 6.1170104  | -12.8459860 | 1.3379491  |
| H  | 5.8208986  | -14.4838674 | 0.7047663  |
| H  | 4.4654972  | -13.4897931 | 1.2728437  |

HEP complex  $R_1=H$   $R_2=C_6H_5$

65

|          |                  |             |            |
|----------|------------------|-------------|------------|
| Energy = | -6581.7065405000 |             |            |
| H        | -1.8468831       | -5.3759143  | 3.2825873  |
| C        | -2.4496293       | -5.7510021  | 2.4563393  |
| C        | -3.7911219       | -5.3883103  | 2.3289183  |
| H        | -4.2373018       | -4.7244811  | 3.0698032  |
| C        | -4.5737227       | -5.8586058  | 1.2610422  |
| H        | -5.6180236       | -5.5539544  | 1.1873563  |
| C        | -4.0428568       | -6.7062360  | 0.2878166  |
| H        | -4.6617764       | -7.0599158  | -0.5342895 |
| C        | -2.6985403       | -7.0729284  | 0.4100464  |
| C        | -1.9173648       | -6.6007505  | 1.4838115  |
| N        | -1.8517103       | -7.8747072  | -0.3552100 |
| N        | -0.6412723       | -7.1440979  | 1.3186313  |
| C        | -2.2016624       | -8.5941153  | -1.6019197 |
| C        | -2.5513521       | -7.6139263  | -2.7247635 |
| H        | -3.4651666       | -7.0420904  | -2.5115541 |
| H        | -1.7255712       | -6.9088685  | -2.8878633 |
| H        | -2.7153905       | -8.1729593  | -3.6564319 |
| C        | -3.2657611       | -9.6646092  | -1.3489042 |
| H        | -4.2319959       | -9.2332306  | -1.0533216 |
| H        | -3.4245405       | -10.2404327 | -2.2711008 |
| H        | -2.9343904       | -10.3582971 | -0.5651348 |
| C        | 0.4822610        | -6.7812478  | 2.2183212  |
| C        | 1.1894121        | -5.5222200  | 1.7053170  |
| H        | 1.6662443        | -5.7194807  | 0.7348956  |
| H        | 0.4837997        | -4.6891872  | 1.5806279  |
| H        | 1.9625562        | -5.2130853  | 2.4228044  |
| C        | 1.4468605        | -7.9365129  | 2.4677781  |
| H        | -0.0109898       | -6.5480415  | 3.1747536  |
| H        | 2.0092333        | -8.1927296  | 1.5567011  |
| H        | 2.1647544        | -7.6330186  | 3.2429250  |
| H        | 0.9230892        | -8.8407927  | 2.8030539  |
| C        | -0.5991530       | -7.9119566  | 0.1902833  |
| H        | -1.2609096       | -9.1025175  | -1.8684272 |
| Pd       | 0.9476847        | -8.9308534  | -0.6560080 |
| Br       | 1.5572343        | -6.9000964  | -1.9623653 |
| Br       | 0.2536897        | -11.0108123 | 0.5355003  |
| C        | 2.4836488        | -9.9381813  | -1.5210164 |
| N        | 3.4019549        | -9.4676705  | -2.3960634 |
| N        | 2.8499107        | -11.2271984 | -1.3379309 |
| C        | 4.3428164        | -10.4267251 | -2.7589775 |
| H        | 3.3756688        | -8.4827692  | -2.6780502 |
| C        | 3.9749182        | -11.5796271 | -2.0786424 |
| C        | 5.4603660        | -10.1037488 | -3.6513339 |
| C        | 4.5105599        | -12.9427125 | -2.0627239 |
| H        | 2.2774407        | -11.8340299 | -0.7425718 |
| C        | 4.4483137        | -13.7152217 | -0.8864249 |
| C        | 5.0634185        | -13.5239725 | -3.2198534 |
| C        | 4.9291946        | -15.0248795 | -0.8681553 |
| C        | 5.4860403        | -15.5867360 | -2.0196454 |

|   |           |             |            |
|---|-----------|-------------|------------|
| C | 5.5509190 | -14.8295684 | -3.1939052 |
| H | 5.8631405 | -16.6099898 | -2.0043678 |
| H | 4.8732816 | -15.6055935 | 0.0535227  |
| H | 5.0968544 | -12.9492664 | -4.1456369 |
| H | 5.9725051 | -15.2638495 | -4.1016827 |
| H | 4.0382602 | -13.2810210 | 0.0273502  |
| C | 6.7521938 | -10.6098841 | -3.4137821 |
| C | 7.8112232 | -10.2734291 | -4.2554184 |
| C | 5.2663939 | -9.2404277  | -4.7466644 |
| H | 6.9239457 | -11.2580568 | -2.5542642 |
| H | 4.2699146 | -8.8477530  | -4.9572648 |
| C | 6.3312098 | -8.9003585  | -5.5817644 |
| C | 7.6067166 | -9.4174864  | -5.3424735 |
| H | 8.8066938 | -10.6711533 | -4.0527222 |
| H | 6.1603011 | -8.2327625  | -6.4274020 |
| H | 8.4382822 | -9.1518719  | -5.9964245 |

HEP complex  $R_1=H$   $R_2=Br$

45

|          |                   |             |            |
|----------|-------------------|-------------|------------|
| Energy = | -11267.0925200000 |             |            |
| H        | -2.5972454        | -5.5342252  | 3.0427268  |
| C        | -2.8912963        | -5.8765184  | 2.0510807  |
| C        | -4.1410194        | -5.5497080  | 1.5232594  |
| H        | -4.8299812        | -4.9477632  | 2.1161583  |
| C        | -4.5254673        | -5.9797915  | 0.2417694  |
| H        | -5.5088567        | -5.7067988  | -0.1417201 |
| C        | -3.6753266        | -6.7486230  | -0.5540290 |
| H        | -3.9883350        | -7.0723361  | -1.5445449 |
| C        | -2.4208956        | -7.0793078  | -0.0302276 |
| C        | -2.0408048        | -6.6491427  | 1.2568190  |
| N        | -1.3393732        | -7.8095042  | -0.5243089 |
| N        | -0.7554834        | -7.1468877  | 1.4815199  |
| C        | -1.2401539        | -8.4580571  | -1.8531732 |
| C        | -1.2666339        | -7.4196004  | -2.9768759 |
| H        | -2.2308129        | -6.8966149  | -3.0392364 |
| H        | -0.4722258        | -6.6755025  | -2.8322498 |
| H        | -1.0947812        | -7.9220633  | -3.9387496 |
| C        | -2.2742815        | -9.5749368  | -2.0080244 |
| H        | -3.3045495        | -9.1932837  | -2.0099738 |
| H        | -2.1071351        | -10.0929195 | -2.9625564 |
| H        | -2.1713824        | -10.3084596 | -1.1973058 |
| C        | 0.0047678         | -6.8210873  | 2.7150873  |
| C        | 0.7869098         | -5.5171627  | 2.5281643  |
| H        | 1.5554366         | -5.6376148  | 1.7521214  |
| H        | 0.1242570         | -4.6918979  | 2.2330847  |
| H        | 1.2781644         | -5.2411886  | 3.4718651  |
| C        | 0.8826885         | -7.9729047  | 3.1936459  |
| H        | -0.7771328        | -6.6631601  | 3.4735401  |
| H        | 1.7231207         | -8.1504237  | 2.5067942  |
| H        | 1.2933205         | -7.7144520  | 4.1799155  |
| H        | 0.3158905         | -8.9082646  | 3.2796521  |
| C        | -0.3261903        | -7.8462285  | 0.3915702  |
| H        | -0.2385673        | -8.9174343  | -1.8328108 |

|    |           |             |            |
|----|-----------|-------------|------------|
| Pd | 1.4320761 | -8.8028811  | 0.0397510  |
| Br | 2.3996467 | -6.7010461  | -0.8754555 |
| Br | 0.4506062 | -10.9493864 | 0.8447576  |
| C  | 3.1638624 | -9.7734992  | -0.3810127 |
| N  | 4.2956539 | -9.2611165  | -0.9261466 |
| N  | 3.4452655 | -11.0885562 | -0.2024315 |
| C  | 5.2685439 | -10.2305012 | -1.0919316 |
| H  | 4.3379332 | -8.2652277  | -1.1738979 |
| C  | 4.7235387 | -11.4011078 | -0.6283292 |
| Br | 6.9529308 | -9.8879578  | -1.8141829 |
| Br | 5.4500782 | -13.1158603 | -0.5390060 |
| H  | 2.7326205 | -11.7125862 | 0.1964876  |

HEP complex  $R_1=H$   $R_2=CCH$

49

|          |                  |             |            |
|----------|------------------|-------------|------------|
| Energy = | -6271.7669974420 |             |            |
| H        | -2.4671128       | -5.7872888  | 3.1094780  |
| C        | -2.7413027       | -6.1168084  | 2.1076287  |
| C        | -4.0109720       | -5.8539355  | 1.5913737  |
| H        | -4.7350515       | -5.3163352  | 2.2039100  |
| C        | -4.3705737       | -6.2652652  | 0.2966713  |
| H        | -5.3703556       | -6.0433244  | -0.0772262 |
| C        | -3.4745203       | -6.9511282  | -0.5241972 |
| H        | -3.7670267       | -7.2601454  | -1.5255034 |
| C        | -2.2007171       | -7.2185224  | -0.0115415 |
| C        | -1.8448063       | -6.8078144  | 1.2887287  |
| N        | -1.0765959       | -7.8616854  | -0.5304172 |
| N        | -0.5292249       | -7.2279979  | 1.4947345  |
| C        | -0.9425500       | -8.4560265  | -1.8811724 |
| C        | -1.0336260       | -7.3820740  | -2.9677014 |
| H        | -2.0258792       | -6.9125539  | -3.0095897 |
| H        | -0.2819735       | -6.5995964  | -2.7996336 |
| H        | -0.8386273       | -7.8412184  | -3.9467575 |
| C        | -1.9097266       | -9.6252815  | -2.0767001 |
| H        | -2.9608473       | -9.3056202  | -2.0603208 |
| H        | -1.7178344       | -10.0932999 | -3.0522099 |
| H        | -1.7592446       | -10.3837052 | -1.2970842 |
| C        | 0.2149457        | -6.8866784  | 2.7333112  |
| C        | 0.9201350        | -5.5354544  | 2.5758847  |
| H        | 1.6990530        | -5.5961368  | 1.8026580  |
| H        | 0.2121825        | -4.7448454  | 2.2915133  |
| H        | 1.3885444        | -5.2494474  | 3.5280922  |
| C        | 1.1585604        | -7.9963965  | 3.1858081  |
| H        | -0.5734245       | -6.7911218  | 3.4958851  |
| H        | 1.9982376        | -8.1205082  | 2.4862171  |
| H        | 1.5668696        | -7.7295980  | 4.1706938  |
| H        | 0.6428785        | -8.9611902  | 3.2669102  |
| C        | -0.0595060       | -7.8632751  | 0.3820175  |
| H        | 0.0842809        | -8.8561030  | -1.8779642 |
| Pd       | 1.7567356        | -8.6983634  | 0.0005814  |
| Br       | 2.5899309        | -6.5062133  | -0.8362116 |
| Br       | 0.8976455        | -10.9237694 | 0.7249728  |
| C        | 3.5471340        | -9.5421936  | -0.4465643 |

|   |           |             |            |
|---|-----------|-------------|------------|
| N | 4.6498976 | -8.9310661  | -0.9391915 |
| N | 3.9083998 | -10.8426329 | -0.3420086 |
| C | 5.6993152 | -9.8190952  | -1.1505278 |
| C | 5.2156577 | -11.0665597 | -0.7624109 |
| C | 5.8399631 | -12.3234141 | -0.7660946 |
| C | 6.9575287 | -9.4440236  | -1.6478634 |
| H | 4.6352982 | -7.9229773  | -1.1311628 |
| H | 3.2363367 | -11.5323935 | 0.0118872  |
| C | 8.0417007 | -9.1031438  | -2.0748000 |
| H | 8.9999830 | -8.8091634  | -2.4502120 |
| C | 6.3721887 | -13.4147926 | -0.7683395 |
| H | 6.8427559 | -14.3758957 | -0.7702615 |

HEP complex  $R_1=H$   $R_2=COOCH_3$

57

|          |                  |             |            |
|----------|------------------|-------------|------------|
| Energy = | -6575.3592682040 |             |            |
| H        | -2.0636632       | -5.3644500  | 2.8410291  |
| C        | -2.4381742       | -5.8201288  | 1.9250369  |
| C        | -3.7378104       | -5.5701526  | 1.4832456  |
| H        | -4.3838309       | -4.9151590  | 2.0682029  |
| C        | -4.2281325       | -6.1460270  | 0.2987445  |
| H        | -5.2487723       | -5.9308200  | -0.0187775 |
| C        | -3.4369278       | -6.9890459  | -0.4824914 |
| H        | -3.8322571       | -7.4265977  | -1.3967670 |
| C        | -2.1337539       | -7.2458369  | -0.0426946 |
| C        | -1.6471049       | -6.6691437  | 1.1470646  |
| N        | -1.0888207       | -8.0216235  | -0.5474117 |
| N        | -0.3385998       | -7.1308386  | 1.3088030  |
| C        | -1.1138818       | -8.8369256  | -1.7844778 |
| C        | -1.2622311       | -7.9539373  | -3.0263697 |
| H        | -2.2313538       | -7.4371726  | -3.0577151 |
| H        | -0.4633799       | -7.2011095  | -3.0635441 |
| H        | -1.1872905       | -8.5794028  | -3.9265020 |
| C        | -2.1503226       | -9.9591373  | -1.6898434 |
| H        | -3.1782130       | -9.5756317  | -1.6339669 |
| H        | -2.0786141       | -10.5943097 | -2.5833842 |
| H        | -1.9585607       | -10.5850028 | -0.8086590 |
| C        | 0.5145109        | -6.6741925  | 2.4357341  |
| C        | 1.2702661        | -5.3982983  | 2.0500729  |
| H        | 1.9816751        | -5.6040989  | 1.2386543  |
| H        | 0.5814603        | -4.6103981  | 1.7154106  |
| H        | 1.8269195        | -5.0201453  | 2.9190941  |
| C        | 1.4354841        | -7.7668158  | 2.9685291  |
| H        | -0.2075358       | -6.4345767  | 3.2309188  |
| H        | 2.2316533        | -8.0086567  | 2.2497343  |
| H        | 1.9071779        | -7.4079115  | 3.8942707  |
| H        | 0.8865590        | -8.6913303  | 3.1874884  |
| C        | 0.0025465        | -7.9501641  | 0.2715065  |
| H        | -0.1124807       | -9.2954926  | -1.8038774 |
| Pd       | 1.7304105        | -8.9711768  | -0.0807202 |
| Br       | 2.7381067        | -7.0026079  | -1.2392177 |
| Br       | 0.7225721        | -10.9977695 | 0.9571885  |
| C        | 3.4287118        | -10.0165488 | -0.4358278 |



|   |           |             |            |
|---|-----------|-------------|------------|
| N | 4.5437382 | -9.5907144  | -1.0641457 |
| N | 3.7214597 | -11.2991379 | -0.0843384 |
| C | 5.5266035 | -10.5786038 | -1.1306061 |
| H | 4.5502597 | -8.6347217  | -1.4399956 |
| C | 4.9766208 | -11.6814872 | -0.5016748 |
| H | 3.0289160 | -11.8515486 | 0.4365006  |
| C | 5.1892058 | -13.7937711 | -2.3537161 |
| C | 7.0567812 | -8.0888373  | -1.4340807 |
| O | 5.5979102 | -14.0116230 | -0.9794845 |
| O | 7.4708958 | -9.3426380  | -2.0198878 |
| H | 4.1707807 | -13.3855317 | -2.4038677 |
| H | 5.2074600 | -14.7867994 | -2.8126857 |
| H | 5.9060898 | -13.1293802 | -2.8510619 |
| H | 6.7030976 | -8.2182516  | -0.4033741 |
| H | 6.2873972 | -7.6018225  | -2.0507483 |
| H | 7.9538926 | -7.4610867  | -1.4323701 |
| C | 5.5613489 | -13.0067392 | -0.0874342 |
| C | 6.8647867 | -10.5280858 | -1.7543010 |
| O | 5.9216574 | -13.1738830 | 1.0576866  |
| O | 7.4417458 | -11.5585998 | -2.0555557 |

HEP complex  $R_1=H$   $R_2=I$

45

|          |                  |             |            |
|----------|------------------|-------------|------------|
| Energy = | -6713.9181685590 |             |            |
| H        | -2.6056945       | -5.5312907  | 3.0446284  |
| C        | -2.8989239       | -5.8731237  | 2.0525860  |
| C        | -4.1482806       | -5.5460773  | 1.5238751  |
| H        | -4.8376862       | -4.9443115  | 2.1164439  |
| C        | -4.5318592       | -5.9756435  | 0.2419042  |
| H        | -5.5148121       | -5.7023980  | -0.1422836 |
| C        | -3.6814226       | -6.7446836  | -0.5533712 |
| H        | -3.9935406       | -7.0678313  | -1.5442409 |
| C        | -2.4274967       | -7.0756038  | -0.0286304 |
| C        | -2.0479780       | -6.6456449  | 1.2586986  |
| N        | -1.3456708       | -7.8060103  | -0.5221020 |
| N        | -0.7627633       | -7.1433424  | 1.4837722  |
| C        | -1.2451861       | -8.4544913  | -1.8506563 |
| C        | -1.2708017       | -7.4159660  | -2.9743421 |
| H        | -2.2350612       | -6.8932395  | -3.0377021 |
| H        | -0.4765402       | -6.6718897  | -2.8290218 |
| H        | -1.0981657       | -7.9183635  | -3.9360890 |
| C        | -2.2791622       | -9.5713664  | -2.0062419 |
| H        | -3.3093715       | -9.1896709  | -2.0095071 |
| H        | -2.1111903       | -10.0895681 | -2.9604839 |
| H        | -2.1771526       | -10.3045243 | -1.1951406 |
| C        | -0.0020938       | -6.8167849  | 2.7167887  |
| C        | 0.7806126        | -5.5134244  | 2.5285548  |
| H        | 1.5481512        | -5.6340250  | 1.7515426  |
| H        | 0.1177939        | -4.6882062  | 2.2338254  |
| H        | 1.2724116        | -5.2369156  | 3.4718571  |
| C        | 0.8753311        | -7.9685065  | 3.1963374  |
| H        | -0.7834489       | -6.6577370  | 3.4756288  |
| H        | 1.7157551        | -8.1473604  | 2.5099208  |

|    |            |             |            |
|----|------------|-------------|------------|
| H  | 1.2852755  | -7.7097311  | 4.1828696  |
| H  | 0.3080066  | -8.9034702  | 3.2827634  |
| C  | -0.3327498 | -7.8427512  | 0.3941351  |
| H  | -0.2435827 | -8.9139132  | -1.8294891 |
| Pd | 1.4261857  | -8.8006528  | 0.0425166  |
| Br | 2.3917999  | -6.6987279  | -0.8733037 |
| Br | 0.4431002  | -10.9454674 | 0.8485886  |
| C  | 3.1590808  | -9.7718103  | -0.3788425 |
| N  | 4.2901529  | -9.2602323  | -0.9253259 |
| N  | 3.4417579  | -11.0861705 | -0.2004287 |
| C  | 5.2664185  | -10.2285549 | -1.0930259 |
| H  | 4.3299199  | -8.2643878  | -1.1724164 |
| C  | 4.7210824  | -11.4020634 | -0.6272706 |
| I  | 7.1326002  | -9.8461883  | -1.8961629 |
| I  | 5.5264096  | -13.3036101 | -0.5291137 |
| H  | 2.7281496  | -11.7077877 | 0.1995851  |

HEP complex  $R_1=H$   $R_2=COCH_3$

55

|          |                  |             |            |
|----------|------------------|-------------|------------|
| Energy = | -6424.8387337180 |             |            |
| H        | -2.4923182       | -5.6758721  | 3.0604816  |
| C        | -2.7978680       | -6.0002049  | 2.0662749  |
| C        | -4.0601159       | -5.6778630  | 1.5659362  |
| H        | -4.7464618       | -5.0971033  | 2.1826715  |
| C        | -4.4605439       | -6.0852656  | 0.2817841  |
| H        | -5.4531342       | -5.8161421  | -0.0800898 |
| C        | -3.6145253       | -6.8269891  | -0.5435485 |
| H        | -3.9400652       | -7.1341747  | -1.5351377 |
| C        | -2.3474324       | -7.1524158  | -0.0474543 |
| C        | -1.9507226       | -6.7447061  | 1.2417479  |
| N        | -1.2649222       | -7.8573715  | -0.5755346 |
| N        | -0.6548536       | -7.2297287  | 1.4332685  |
| C        | -1.1789586       | -8.4708585  | -1.9218824 |
| C        | -1.2481238       | -7.4060860  | -3.0189141 |
| H        | -2.2274383       | -6.9100484  | -3.0586437 |
| H        | -0.4740200       | -6.6427900  | -2.8649755 |
| H        | -1.0730081       | -7.8798845  | -3.9945233 |
| C        | -2.1941757       | -9.6034627  | -2.0859901 |
| H        | -3.2312582       | -9.2424038  | -2.0516810 |
| H        | -2.0408156       | -10.0888687 | -3.0597946 |
| H        | -2.0575946       | -10.3587623 | -1.3007694 |
| C        | 0.1259573        | -6.9086966  | 2.6550398  |
| C        | 0.8793529        | -5.5877955  | 2.4690213  |
| H        | 1.6374157        | -5.6867449  | 1.6796034  |
| H        | 0.1962414        | -4.7733012  | 2.1919377  |
| H        | 1.3806090        | -5.3105387  | 3.4069460  |
| C        | 1.0367633        | -8.0488948  | 3.0991826  |
| H        | -0.6421815       | -6.7762640  | 3.4323670  |
| H        | 1.8677825        | -8.1976343  | 2.3943372  |
| H        | 1.4610319        | -7.7956909  | 4.0810908  |
| H        | 0.4920881        | -8.9973824  | 3.1832180  |
| C        | -0.2356919       | -7.9005909  | 0.3218679  |
| H        | -0.1682896       | -8.9102929  | -1.9321910 |

|    |           |             |            |
|----|-----------|-------------|------------|
| Pd | 1.5277533 | -8.8387269  | -0.0816906 |
| Br | 2.4692056 | -6.7122984  | -0.9708776 |
| Br | 0.5782414 | -11.0083858 | 0.7033313  |
| C  | 3.2503159 | -9.7882562  | -0.5610588 |
| N  | 4.3844881 | -9.2552866  | -1.0758688 |
| N  | 3.5321444 | -11.1103502 | -0.4711894 |
| C  | 5.3621861 | -10.2076435 | -1.3201212 |
| H  | 4.4045113 | -8.2504010  | -1.2881795 |
| C  | 4.8107158 | -11.4177755 | -0.9103227 |
| C  | 6.6546399 | -9.8703359  | -1.9797821 |
| C  | 5.3762781 | -12.7933007 | -0.8191094 |
| H  | 2.8226034 | -11.7382708 | -0.0728317 |
| C  | 4.3758170 | -13.9328805 | -0.7844517 |
| C  | 7.1112895 | -8.4279701  | -1.8686732 |
| H  | 6.4315702 | -7.7587303  | -2.4206666 |
| H  | 8.1135321 | -8.3409917  | -2.3007193 |
| H  | 7.1221090 | -8.0917313  | -0.8212153 |
| H  | 3.6739671 | -13.8731435 | -1.6299083 |
| H  | 3.7768130 | -13.9004705 | 0.1402474  |
| H  | 4.9199886 | -14.8824512 | -0.8153362 |
| O  | 6.5804367 | -12.9762481 | -0.7524369 |
| O  | 7.2876909 | -10.7125928 | -2.5945458 |

HEP complex  $R_1=H$   $R_2=OCH_3$

53

|          |                  |             |            |
|----------|------------------|-------------|------------|
| Energy = | -6348.5514118910 |             |            |
| H        | -2.5042465       | -5.4730068  | 3.0039258  |
| C        | -2.8099242       | -5.8327185  | 2.0219415  |
| C        | -4.0621359       | -5.5057803  | 1.4992661  |
| H        | -4.7402019       | -4.8856704  | 2.0862065  |
| C        | -4.4625491       | -5.9590605  | 0.2308826  |
| H        | -5.4475981       | -5.6865219  | -0.1487096 |
| C        | -3.6261738       | -6.7519256  | -0.5561881 |
| H        | -3.9511255       | -7.0941342  | -1.5365447 |
| C        | -2.3696343       | -7.0827365  | -0.0376356 |
| C        | -1.9730751       | -6.6290585  | 1.2365572  |
| N        | -1.3003434       | -7.8340991  | -0.5254235 |
| N        | -0.6906241       | -7.1347639  | 1.4590247  |
| C        | -1.2247337       | -8.5186750  | -1.8368248 |
| C        | -1.2579995       | -7.5116096  | -2.9886459 |
| H        | -2.2170869       | -6.9791659  | -3.0510498 |
| H        | -0.4534051       | -6.7726708  | -2.8769963 |
| H        | -1.1069445       | -8.0424926  | -3.9387161 |
| C        | -2.2706161       | -9.6301752  | -1.9470881 |
| H        | -3.2979530       | -9.2405616  | -1.9403221 |
| H        | -2.1244228       | -10.1729623 | -2.8911659 |
| H        | -2.1583754       | -10.3440164 | -1.1203071 |
| C        | 0.0860573        | -6.7864800  | 2.6757778  |
| C        | 0.8930105        | -5.5055135  | 2.4408965  |
| H        | 1.6571435        | -5.6693711  | 1.6686904  |
| H        | 0.2455712        | -4.6789000  | 2.1166514  |
| H        | 1.3917412        | -5.2045887  | 3.3731405  |
| C        | 0.9466832        | -7.9382975  | 3.1847779  |

|    |            |             |            |
|----|------------|-------------|------------|
| H  | -0.6860134 | -6.5882954  | 3.4346187  |
| H  | 1.7796806  | -8.1510926  | 2.4990369  |
| H  | 1.3669679  | -7.6564839  | 4.1607727  |
| H  | 0.3653303  | -8.8612978  | 3.3020378  |
| C  | -0.2769929 | -7.8637585  | 0.3811986  |
| H  | -0.2268639 | -8.9863160  | -1.8164606 |
| Pd | 1.4601296  | -8.8680601  | 0.0422821  |
| Br | 2.4818457  | -6.8141967  | -0.9439668 |
| Br | 0.4217095  | -10.9620389 | 0.9128351  |
| C  | 3.1633813  | -9.9011328  | -0.3582686 |
| N  | 4.2905472  | -9.4242705  | -0.9581951 |
| N  | 3.4415646  | -11.1995586 | -0.1182800 |
| C  | 5.2620420  | -10.4058988 | -1.0821001 |
| H  | 4.3183995  | -8.4375134  | -1.2391165 |
| C  | 4.7242375  | -11.5515078 | -0.5412789 |
| H  | 2.7483065  | -11.7986842 | 0.3405949  |
| C  | 5.1246177  | -13.6815990 | -1.4746327 |
| C  | 6.8980246  | -8.9090383  | -1.9113811 |
| O  | 5.2530267  | -12.7807606 | -0.3475846 |
| O  | 6.4743026  | -10.2581680 | -1.6603640 |
| H  | 4.0651798  | -13.8424251 | -1.7261283 |
| H  | 5.5780784  | -14.6273626 | -1.1579281 |
| H  | 5.6601809  | -13.2837646 | -2.3490327 |
| H  | 6.9057360  | -8.3166094  | -0.9832115 |
| H  | 6.2545344  | -8.4223175  | -2.6616756 |
| H  | 7.9158086  | -8.9868226  | -2.3060828 |

HEP complex  $R_1=H$   $R_2=C_6H_5$

47

|          |                  |             |            |
|----------|------------------|-------------|------------|
| Energy = | -6915.9218718360 |             |            |
| H        | -2.6544535       | -5.5731161  | 3.0637775  |
| C        | -2.9378107       | -5.9058005  | 2.0658274  |
| C        | -4.1859466       | -5.5825236  | 1.5319334  |
| H        | -4.8838756       | -4.9921736  | 2.1261348  |
| C        | -4.5565590       | -6.0006286  | 0.2424999  |
| H        | -5.5389545       | -5.7310151  | -0.1459179 |
| C        | -3.6936969       | -6.7534918  | -0.5551763 |
| H        | -3.9956968       | -7.0679217  | -1.5520615 |
| C        | -2.4403736       | -7.0794961  | -0.0257532 |
| C        | -2.0747057       | -6.6624320  | 1.2698200  |
| N        | -1.3480647       | -7.7932600  | -0.5199911 |
| N        | -0.7863766       | -7.1504350  | 1.4983212  |
| C        | -1.2340179       | -8.4247278  | -1.8555947 |
| C        | -1.2682112       | -7.3737801  | -2.9675595 |
| H        | -2.2386506       | -6.8625342  | -3.0300443 |
| H        | -0.4847284       | -6.6211249  | -2.8092747 |
| H        | -1.0841589       | -7.8627458  | -3.9341459 |
| C        | -2.2542309       | -9.5517759  | -2.0284819 |
| H        | -3.2892095       | -9.1829809  | -2.0251344 |
| H        | -2.0804071       | -10.0533080 | -2.9906490 |
| H        | -2.1426740       | -10.2958380 | -1.2286723 |
| C        | -0.0408158       | -6.8324299  | 2.7428337  |
| C        | 0.7281059        | -5.5170107  | 2.5829538  |

|    |            |             |            |
|----|------------|-------------|------------|
| H  | 1.5097118  | -5.6190917  | 1.8173505  |
| H  | 0.0605698  | -4.6958916  | 2.2874117  |
| H  | 1.2014600  | -5.2469809  | 3.5375526  |
| C  | 0.8470406  | -7.9787448  | 3.2164298  |
| H  | -0.8317815 | -6.6939676  | 3.4957993  |
| H  | 1.6960420  | -8.1379810  | 2.5356681  |
| H  | 1.2450144  | -7.7250069  | 4.2092003  |
| H  | 0.2921136  | -8.9223489  | 3.2876734  |
| C  | -0.3405288 | -7.8313223  | 0.4027177  |
| H  | -0.2271210 | -8.8724080  | -1.8358618 |
| Pd | 1.4376893  | -8.7542313  | 0.0535495  |
| Br | 2.3606347  | -6.6208134  | -0.8311542 |
| Br | 0.4849936  | -10.9283225 | 0.8257214  |
| C  | 3.1977245  | -9.6793017  | -0.3576223 |
| N  | 4.3273687  | -9.1496985  | -0.8650370 |
| N  | 3.4935534  | -11.0008216 | -0.1946671 |
| C  | 5.3299274  | -10.1085593 | -1.0404156 |
| H  | 4.3709121  | -8.1513412  | -1.0939647 |
| C  | 4.7798486  | -11.2973471 | -0.5985437 |
| S  | 6.9533363  | -9.7821189  | -1.5870114 |
| S  | 5.4488065  | -12.9111663 | -0.5199104 |
| H  | 2.7749358  | -11.6288503 | 0.1864340  |
| H  | 6.6510224  | -12.5014432 | -1.0022009 |
| H  | 6.7366883  | -9.8769706  | -2.9273543 |

HEP complex  $R_1=H$   $R_2=SH$

47

|          |                  |             |            |
|----------|------------------|-------------|------------|
| Energy = | -6915.9218718360 |             |            |
| H        | -2.6544535       | -5.5731161  | 3.0637775  |
| C        | -2.9378107       | -5.9058005  | 2.0658274  |
| C        | -4.1859466       | -5.5825236  | 1.5319334  |
| H        | -4.8838756       | -4.9921736  | 2.1261348  |
| C        | -4.5565590       | -6.0006286  | 0.2424999  |
| H        | -5.5389545       | -5.7310151  | -0.1459179 |
| C        | -3.6936969       | -6.7534918  | -0.5551763 |
| H        | -3.9956968       | -7.0679217  | -1.5520615 |
| C        | -2.4403736       | -7.0794961  | -0.0257532 |
| C        | -2.0747057       | -6.6624320  | 1.2698200  |
| N        | -1.3480647       | -7.7932600  | -0.5199911 |
| N        | -0.7863766       | -7.1504350  | 1.4983212  |
| C        | -1.2340179       | -8.4247278  | -1.8555947 |
| C        | -1.2682112       | -7.3737801  | -2.9675595 |
| H        | -2.2386506       | -6.8625342  | -3.0300443 |
| H        | -0.4847284       | -6.6211249  | -2.8092747 |
| H        | -1.0841589       | -7.8627458  | -3.9341459 |
| C        | -2.2542309       | -9.5517759  | -2.0284819 |
| H        | -3.2892095       | -9.1829809  | -2.0251344 |
| H        | -2.0804071       | -10.0533080 | -2.9906490 |
| H        | -2.1426740       | -10.2958380 | -1.2286723 |
| C        | -0.0408158       | -6.8324299  | 2.7428337  |
| C        | 0.7281059        | -5.5170107  | 2.5829538  |
| H        | 1.5097118        | -5.6190917  | 1.8173505  |
| H        | 0.0605698        | -4.6958916  | 2.2874117  |

|    |            |             |            |
|----|------------|-------------|------------|
| H  | 1.2014600  | -5.2469809  | 3.5375526  |
| C  | 0.8470406  | -7.9787448  | 3.2164298  |
| H  | -0.8317815 | -6.6939676  | 3.4957993  |
| H  | 1.6960420  | -8.1379810  | 2.5356681  |
| H  | 1.2450144  | -7.7250069  | 4.2092003  |
| H  | 0.2921136  | -8.9223489  | 3.2876734  |
| C  | -0.3405288 | -7.8313223  | 0.4027177  |
| H  | -0.2271210 | -8.8724080  | -1.8358618 |
| Pd | 1.4376893  | -8.7542313  | 0.0535495  |
| Br | 2.3606347  | -6.6208134  | -0.8311542 |
| Br | 0.4849936  | -10.9283225 | 0.8257214  |
| C  | 3.1977245  | -9.6793017  | -0.3576223 |
| N  | 4.3273687  | -9.1496985  | -0.8650370 |
| N  | 3.4935534  | -11.0008216 | -0.1946671 |
| C  | 5.3299274  | -10.1085593 | -1.0404156 |
| H  | 4.3709121  | -8.1513412  | -1.0939647 |
| C  | 4.7798486  | -11.2973471 | -0.5985437 |
| S  | 6.9533363  | -9.7821189  | -1.5870114 |
| S  | 5.4488065  | -12.9111663 | -0.5199104 |
| H  | 2.7749358  | -11.6288503 | 0.1864340  |
| H  | 6.6510224  | -12.5014432 | -1.0022009 |
| H  | 6.7366883  | -9.8769706  | -2.9273543 |

HEP complex  $R_1=COCH_3$   $R_2=H$

55

Energy = -6424.8185843940

|   |            |             |            |
|---|------------|-------------|------------|
| H | -2.1005629 | -4.9095087  | 2.3719722  |
| C | -2.5319881 | -5.5973510  | 1.6458517  |
| C | -3.8866289 | -5.5275281  | 1.3210322  |
| H | -4.5122761 | -4.7757495  | 1.8028058  |
| C | -4.4581933 | -6.4085377  | 0.3872626  |
| H | -5.5211134 | -6.3304178  | 0.1572339  |
| C | -3.6935858 | -7.3839476  | -0.2526726 |
| H | -4.1511660 | -8.0597640  | -0.9717535 |
| C | -2.3334491 | -7.4565324  | 0.0684578  |
| C | -1.7640016 | -6.5764774  | 1.0087487  |
| N | -1.2959061 | -8.2837593  | -0.3583203 |
| N | -0.4137860 | -6.9189185  | 1.1092377  |
| C | -1.4077884 | -9.3588045  | -1.3658694 |
| C | -1.8027031 | -8.8005487  | -2.7357612 |
| H | -2.8176726 | -8.3813744  | -2.7434050 |
| H | -1.0964920 | -8.0205010  | -3.0489881 |
| H | -1.7710773 | -9.6099380  | -3.4786492 |
| C | -2.3016652 | -10.4975547 | -0.8682912 |
| H | -3.3464001 | -10.1828023 | -0.7414163 |
| H | -2.2883942 | -11.3184042 | -1.5992649 |
| H | -1.9331490 | -10.8819054 | 0.0921068  |
| C | 0.5206892  | -6.1661968  | 1.9877006  |
| C | 1.4946274  | -5.3278425  | 1.1570632  |
| H | 2.1328195  | -5.9645799  | 0.5327522  |
| H | 0.9521886  | -4.6328078  | 0.5010618  |
| H | 2.1373647  | -4.7417339  | 1.8287811  |
| C | 1.1936759  | -7.0677476  | 3.0205004  |

|    |            |             |            |
|----|------------|-------------|------------|
| H  | -0.1386693 | -5.4769933  | 2.5335699  |
| H  | 1.8804443  | -7.7801951  | 2.5501382  |
| H  | 1.7687471  | -6.4409347  | 3.7169006  |
| H  | 0.4487963  | -7.6354568  | 3.5936584  |
| C  | -0.1258603 | -7.9654411  | 0.2774813  |
| H  | -0.3771128 | -9.7316726  | -1.4395150 |
| Pd | 1.6326934  | -8.9741800  | -0.0225811 |
| Br | 2.1514714  | -7.5983364  | -2.0388559 |
| Br | 0.9841668  | -10.5969483 | 1.7682441  |
| C  | 3.3953988  | -9.9377246  | -0.3449065 |
| N  | 4.6378392  | -9.4260419  | -0.0106295 |
| N  | 3.7087559  | -11.1333731 | -0.9532927 |
| C  | 5.6734678  | -10.2856892 | -0.4138728 |
| C  | 4.8627888  | -8.1561305  | 0.6371949  |
| C  | 5.0933327  | -11.3558849 | -0.9854881 |
| H  | 6.7177600  | -10.0681742 | -0.2385694 |
| H  | 5.4993664  | -12.2598132 | -1.4188393 |
| C  | 2.8419006  | -12.1331405 | -1.5731458 |
| C  | 1.4004808  | -11.8017689 | -1.7259500 |
| C  | 6.2663644  | -7.6140102  | 0.5178755  |
| H  | 0.9427446  | -11.6668387 | -0.7311556 |
| H  | 0.9186836  | -12.6197262 | -2.2707945 |
| H  | 1.2917049  | -10.8491869 | -2.2650491 |
| H  | 6.9700226  | -8.2086532  | 1.1194243  |
| H  | 6.2619413  | -6.5889588  | 0.8994751  |
| H  | 6.6147028  | -7.6236494  | -0.5241596 |
| O  | 3.9719360  | -7.5923078  | 1.2252588  |
| O  | 3.3677959  | -13.1599957 | -1.9459332 |

HEP complex  $R_1=SH$   $R_2=H$

47

|          |                  |             |            |
|----------|------------------|-------------|------------|
| Energy = | -6915.8647078700 |             |            |
| H        | -2.5258265       | -5.9205650  | 3.0919801  |
| C        | -2.7542090       | -6.1867452  | 2.0604414  |
| C        | -3.9902836       | -5.8667199  | 1.4974922  |
| H        | -4.7343364       | -5.3481142  | 2.1024655  |
| C        | -4.2905138       | -6.1970140  | 0.1650736  |
| H        | -5.2652394       | -5.9326368  | -0.2457126 |
| C        | -3.3665925       | -6.8546534  | -0.6480053 |
| H        | -3.6144196       | -7.1016315  | -1.6782207 |
| C        | -2.1249128       | -7.1763104  | -0.0894659 |
| C        | -1.8297732       | -6.8489476  | 1.2488241  |
| N        | -0.9845249       | -7.8059021  | -0.5891229 |
| N        | -0.5334141       | -7.3050414  | 1.4957687  |
| C        | -0.7968756       | -8.3319480  | -1.9616344 |
| C        | -0.8393834       | -7.2045976  | -2.9960693 |
| H        | -1.8347939       | -6.7469097  | -3.0761659 |
| H        | -0.1139267       | -6.4202290  | -2.7431043 |
| H        | -0.5778662       | -7.6106058  | -3.9828772 |
| C        | -1.7614707       | -9.4829275  | -2.2551445 |
| H        | -2.8112345       | -9.1584107  | -2.2548526 |
| H        | -1.5384388       | -9.8983041  | -3.2477288 |
| H        | -1.6388631       | -10.2836134 | -1.5137187 |

|    |            |             |            |
|----|------------|-------------|------------|
| C  | 0.1398652  | -7.0649026  | 2.7966948  |
| C  | 0.8521956  | -5.7079020  | 2.7908966  |
| H  | 1.6748627  | -5.7096566  | 2.0623477  |
| H  | 0.1614319  | -4.8939207  | 2.5315771  |
| H  | 1.2652071  | -5.5031711  | 3.7886866  |
| C  | 1.0566936  | -8.2106487  | 3.2123220  |
| H  | -0.6900090 | -7.0273412  | 3.5195819  |
| H  | 1.9378058  | -8.2843232  | 2.5579779  |
| H  | 1.4071542  | -8.0238212  | 4.2374219  |
| H  | 0.5334188  | -9.1749318  | 3.1871504  |
| C  | -0.0141173 | -7.8801804  | 0.3713631  |
| H  | 0.2268774  | -8.7396738  | -1.9386509 |
| Pd | 1.8042850  | -8.7304629  | 0.0228257  |
| Br | 2.7874335  | -6.4904953  | -0.4833913 |
| Br | 0.8251030  | -10.9918833 | 0.4349933  |
| C  | 3.5861793  | -9.6100645  | -0.4019897 |
| N  | 4.2572828  | -9.6155071  | -1.5937464 |
| N  | 4.3868311  | -10.3596079 | 0.4155883  |
| C  | 5.4442575  | -10.3393598 | -1.5176827 |
| S  | 3.7060855  | -8.8619689  | -3.0525797 |
| C  | 5.5179956  | -10.8248070 | -0.2499774 |
| S  | 4.0592382  | -10.7053989 | 2.0794755  |
| H  | 6.2542892  | -11.4500976 | 0.2382903  |
| H  | 6.1133669  | -10.4344394 | -2.3632264 |
| H  | 2.7918132  | -11.1804424 | 1.8057446  |
| H  | 3.4828218  | -7.6486449  | -2.4286855 |

HEP complex  $R_1=OCH_3$   $R_2=H$

53

|          |                  |             |            |
|----------|------------------|-------------|------------|
| Energy = | -6348.4336465210 |             |            |
| H        | -2.4523684       | -6.1327951  | 3.1212175  |
| C        | -2.6358614       | -6.2699153  | 2.0560991  |
| C        | -3.8006210       | -5.7798630  | 1.4638704  |
| H        | -4.5341181       | -5.2586542  | 2.0794414  |
| C        | -4.0427630       | -5.9438806  | 0.0896666  |
| H        | -4.9626328       | -5.5489426  | -0.3424395 |
| C        | -3.1294144       | -6.6002156  | -0.7367143 |
| H        | -3.3304260       | -6.7171899  | -1.7997041 |
| C        | -1.9600169       | -7.0936223  | -0.1483295 |
| C        | -1.7236299       | -6.9323611  | 1.2314297  |
| N        | -0.8531647       | -7.7774332  | -0.6491135 |
| N        | -0.4932726       | -7.5363093  | 1.4983343  |
| C        | -0.6321774       | -8.1849550  | -2.0553808 |
| C        | -0.4832179       | -6.9619744  | -2.9640029 |
| H        | -1.4056000       | -6.3676405  | -3.0203557 |
| H        | 0.3279288        | -6.3149789  | -2.6029074 |
| H        | -0.2360385       | -7.2915890  | -3.9827925 |
| C        | -1.6907204       | -9.1890221  | -2.5163610 |
| H        | -2.6960757       | -8.7484336  | -2.5592292 |
| H        | -1.4367562       | -9.5456724  | -3.5241856 |
| H        | -1.7100508       | -10.0550478 | -1.8417978 |
| C        | 0.1118473        | -7.5100677  | 2.8534056  |
| C        | 1.0208789        | -6.2863810  | 3.0103233  |



|    |            |             |            |
|----|------------|-------------|------------|
| H  | 1.8799023  | -6.3558086  | 2.3286614  |
| H  | 0.4800816  | -5.3565130  | 2.7845890  |
| H  | 1.3879647  | -6.2278241  | 4.0448749  |
| C  | 0.8040329  | -8.8191460  | 3.2189451  |
| H  | -0.7535671 | -7.3965214  | 3.5240394  |
| H  | 1.6997497  | -8.9904675  | 2.6038611  |
| H  | 1.1073065  | -8.7749253  | 4.2748004  |
| H  | 0.1407019  | -9.6813206  | 3.0754308  |
| C  | 0.0436022  | -8.0412761  | 0.3485377  |
| H  | 0.3372606  | -8.7070290  | -2.0139291 |
| Pd | 1.7945963  | -9.0072255  | 0.0176854  |
| Br | 2.9563476  | -6.8222642  | -0.3246835 |
| Br | 0.6081218  | -11.1788098 | 0.2207338  |
| C  | 3.4992615  | -10.0423903 | -0.3678439 |
| N  | 3.9509303  | -10.5369718 | -1.5517222 |
| N  | 4.4466255  | -10.5070709 | 0.4906301  |
| C  | 5.1009336  | -11.3010853 | -1.4398280 |
| O  | 3.2961852  | -10.3693537 | -2.7556542 |
| C  | 5.4233154  | -11.2816349 | -0.1143694 |
| O  | 4.4167407  | -10.2941319 | 1.8546847  |
| H  | 6.2202538  | -11.7530242 | 0.4458412  |
| H  | 5.5545885  | -11.7933049 | -2.2901955 |
| C  | 3.7196775  | -9.1354860  | -3.3957883 |
| H  | 3.1282252  | -9.0948048  | -4.3172566 |
| H  | 4.7923738  | -9.1774824  | -3.6391859 |
| H  | 3.4991770  | -8.2727751  | -2.7502546 |
| C  | 5.0689643  | -9.0380036  | 2.1855335  |
| H  | 4.9503028  | -8.9515643  | 3.2713016  |
| H  | 4.5741199  | -8.2017437  | 1.6704619  |
| H  | 6.1374948  | -9.0799868  | 1.9244848  |

HEP complex  $R_1=COOCH_3$   $R_2=H$

55

|          |                  |            |            |
|----------|------------------|------------|------------|
| Energy = | -6424.8101697700 |            |            |
| H        | -2.6363692       | -5.7771050 | 3.0066579  |
| C        | -2.8445475       | -6.0910295 | 1.9842545  |
| C        | -4.0773169       | -5.8141020 | 1.3925396  |
| H        | -4.8368687       | -5.2819103 | 1.9658938  |
| C        | -4.3547464       | -6.2050504 | 0.0716559  |
| H        | -5.3276093       | -5.9727967 | -0.3625939 |
| C        | -3.4104461       | -6.8846072 | -0.6983913 |
| H        | -3.6384773       | -7.1773909 | -1.7210968 |
| C        | -2.1731635       | -7.1672590 | -0.1092424 |
| C        | -1.8989455       | -6.7771169 | 1.2171518  |
| N        | -1.0241730       | -7.8106022 | -0.5653300 |
| N        | -0.6005681       | -7.2062648 | 1.4983472  |
| C        | -0.8175492       | -8.3906905 | -1.9134375 |
| C        | -0.8344600       | -7.3023256 | -2.9889410 |
| H        | -1.8195416       | -6.8255118 | -3.0891700 |
| H        | -0.0891097       | -6.5294091 | -2.7602188 |
| H        | -0.5759071       | -7.7515755 | -3.9574744 |
| C        | -1.7829329       | -9.5477268 | -2.1785215 |
| H        | -2.8312550       | -9.2213214 | -2.2243588 |

|    |            |             |            |
|----|------------|-------------|------------|
| H  | -1.5320120 | -10.0087631 | -3.1439789 |
| H  | -1.6853681 | -10.3144365 | -1.3982842 |
| C  | 0.0591988  | -6.9251846  | 2.7989698  |
| C  | 1.0593358  | -5.7737771  | 2.6705915  |
| H  | 1.8893129  | -6.0462639  | 2.0056650  |
| H  | 0.5787332  | -4.8723195  | 2.2662420  |
| H  | 1.4671198  | -5.5326535  | 3.6627389  |
| C  | 0.6634463  | -8.1794435  | 3.4242032  |
| H  | -0.7677725 | -6.5953728  | 3.4442670  |
| H  | 1.5285861  | -8.5348145  | 2.8521545  |
| H  | 0.9989886  | -7.9419363  | 4.4439047  |
| H  | -0.0702619 | -8.9947080  | 3.4745831  |
| C  | -0.0634907 | -7.8312067  | 0.4081858  |
| H  | 0.2004289  | -8.8042630  | -1.8618716 |
| Pd | 1.7687632  | -8.6658809  | 0.0792574  |
| Br | 2.6368873  | -6.4907147  | -0.7808157 |
| Br | 0.9250282  | -10.9051061 | 0.7906343  |
| C  | 3.5393050  | -9.5104412  | -0.3692482 |
| N  | 4.1164095  | -9.6298066  | -1.6112682 |
| N  | 4.4545664  | -10.1111588 | 0.4640672  |
| C  | 5.3588421  | -10.2715602 | -1.5437322 |
| C  | 3.5024340  | -9.1878970  | -2.8627959 |
| C  | 5.5552754  | -10.6025754 | -0.2484000 |
| C  | 4.3216901  | -10.1968407 | 1.9126945  |
| H  | 6.3831753  | -11.1132146 | 0.2252740  |
| H  | 5.9720437  | -10.4610270 | -2.4147608 |
| C  | 4.4756298  | -8.6393966  | -3.8731281 |
| H  | 3.9033463  | -8.1881127  | -4.6889366 |
| H  | 5.1051783  | -9.4404279  | -4.2900023 |
| H  | 5.1336880  | -7.8912539  | -3.4112850 |
| C  | 4.9468788  | -11.4228873 | 2.5270029  |
| H  | 4.5949577  | -11.5016019 | 3.5600426  |
| H  | 6.0440630  | -11.3318526 | 2.5415902  |
| H  | 4.6832678  | -12.3282678 | 1.9648278  |
| O  | 3.7691745  | -9.3212083  | 2.5266621  |
| O  | 2.3158674  | -9.2979793  | -3.0314449 |

*Fe-adduct*  $R_1=CH_1CH_2$   $R_2=H$

30

|          |                  |            |            |
|----------|------------------|------------|------------|
| Energy = | -3393.1561058670 |            |            |
| Fe       | 1.4977455        | 10.3306834 | 23.7013807 |
| S        | 3.6659884        | 10.1804598 | 23.5641411 |
| C        | 4.2476736        | 10.5967006 | 25.1183544 |
| C        | 3.3578930        | 10.8791174 | 26.1291425 |
| S        | 1.6773402        | 10.8181162 | 25.8242007 |
| S        | 1.5931058        | 10.6930470 | 21.5488210 |
| C        | 0.2751381        | 11.7254831 | 21.2076976 |
| C        | -0.5825333       | 12.0978085 | 22.2170289 |
| C        | 0.9121334        | 8.5243797  | 23.7539557 |
| N        | 1.4200025        | 7.4657324  | 24.5093196 |
| C        | 0.7165053        | 6.2879156  | 24.2576581 |

|   |            |            |            |
|---|------------|------------|------------|
| H | 0.9576862  | 5.3547783  | 24.7466890 |
| C | -0.2366699 | 6.5725731  | 23.3499388 |
| H | -0.9929558 | 5.9383287  | 22.9088897 |
| N | -0.1267788 | 7.9274924  | 23.0381642 |
| S | -0.3294086 | 11.5147960 | 23.8056706 |
| H | 0.1605832  | 12.0859940 | 20.1827320 |
| H | -1.4195353 | 12.7799672 | 22.0512814 |
| H | 5.3295451  | 10.6495643 | 25.2606428 |
| H | 3.6855605  | 11.1656800 | 27.1311816 |
| C | 2.4947579  | 7.5331125  | 25.4165166 |
| C | -0.9784004 | 8.5697898  | 22.1185657 |
| C | -1.8696117 | 7.9540212  | 21.3321481 |
| C | 2.9181674  | 6.5260182  | 26.1900908 |
| H | 2.9775789  | 8.5032413  | 25.4340260 |
| H | 2.4655520  | 5.5358785  | 26.2146479 |
| H | 3.7683257  | 6.6946246  | 26.8470965 |
| H | -0.8637710 | 9.6476437  | 22.1115399 |
| H | -2.0144768 | 6.8754058  | 21.2958355 |
| H | -2.4906312 | 8.5571967  | 20.6739225 |

*Fe-adduct R<sub>1</sub>=CCH<sub>1</sub> R<sub>2</sub>=H*

26

|          |                  |            |            |
|----------|------------------|------------|------------|
| Energy = | -3390.5477839910 |            |            |
| Fe       | 1.5990771        | 10.1966056 | 23.6360387 |
| S        | 3.7064396        | 9.2867773  | 23.6079159 |
| C        | 4.3094551        | 10.5208094 | 24.7215963 |
| C        | 3.5260773        | 11.3183617 | 25.5434449 |
| S        | 1.7490482        | 11.2411219 | 25.6708455 |
| S        | 1.5081187        | 11.1112092 | 21.4625342 |
| C        | 0.1207223        | 12.1921801 | 21.5468980 |
| C        | -0.7979971       | 12.0947396 | 22.5553070 |
| C        | 0.9341411        | 8.2515656  | 23.8192007 |
| N        | 1.2663537        | 7.2194748  | 24.7640914 |
| C        | 0.5491862        | 6.0459291  | 24.4429775 |
| H        | 0.6054315        | 5.1011958  | 24.9753623 |
| C        | -0.2156521       | 6.2867681  | 23.3620065 |
| H        | -0.8882676       | 5.6010765  | 22.8543833 |
| N        | -0.0112473       | 7.6156124  | 22.9624945 |
| S        | -0.6246129       | 10.9456950 | 23.8588616 |
| H        | -0.0275539       | 12.9449708 | 20.7619549 |
| H        | -1.6745650       | 12.7542368 | 22.5482374 |
| H        | 5.4003938        | 10.6665106 | 24.7375831 |
| H        | 4.0407031        | 12.0691408 | 26.1635656 |
| C        | 2.1106852        | 7.2771607  | 25.8367531 |
| C        | -0.6736497       | 8.1321151  | 21.8968558 |
| C        | 2.9211524        | 7.2421774  | 26.7539066 |
| C        | -1.3393137       | 8.4546727  | 20.9227766 |
| H        | -1.9542094       | 8.6109302  | 20.0850733 |
| H        | 3.5192636        | 7.1545528  | 27.6203552 |

*Fe-adduct R<sub>1</sub>=Br R<sub>2</sub>=H*

22

|          |                  |            |            |
|----------|------------------|------------|------------|
| Energy = | -8385.9155785530 |            |            |
| Fe       | 1.4602483        | 10.2831910 | 23.6629679 |
| S        | 3.6090042        | 9.8846917  | 23.3474036 |
| C        | 4.3733405        | 10.4749198 | 24.7507254 |
| C        | 3.6189124        | 11.0072857 | 25.7699488 |
| S        | 1.9139458        | 11.0408756 | 25.6329756 |
| S        | 1.4408211        | 10.9556888 | 21.6121623 |
| C        | 0.0021566        | 11.8625403 | 21.4264539 |
| C        | -0.8873810       | 11.9485731 | 22.4716293 |
| C        | 0.9141773        | 8.4737050  | 23.7603161 |
| N        | 1.3129156        | 7.4618454  | 24.6276473 |
| C        | 0.6915144        | 6.2411201  | 24.3958195 |
| H        | 0.9002239        | 5.3625914  | 24.9914881 |
| C        | -0.1411763       | 6.4364220  | 23.3447746 |
| H        | -0.8125270       | 5.7642322  | 22.8273346 |
| N        | 0.0031933        | 7.7690497  | 22.9804821 |
| S        | -0.5359571       | 11.1793566 | 23.9502618 |
| H        | -0.1583519       | 12.3743420 | 20.4749084 |
| H        | -1.8216126       | 12.5107923 | 22.3970795 |
| H        | 5.4641795        | 10.4279318 | 24.7972848 |
| H        | 4.0667149        | 11.4400937 | 26.6672730 |
| Br       | 2.5304125        | 7.6321762  | 26.0174054 |
| Br       | -0.9822444       | 8.4545954  | 21.5652577 |

*Fe-adduct R<sub>1</sub>=Cl R<sub>2</sub>=H*

22

|          |                  |            |            |
|----------|------------------|------------|------------|
| Energy = | -4157.5436783530 |            |            |
| Fe       | 1.4713518        | 10.3116689 | 23.6576889 |
| S        | 3.6293220        | 10.1159244 | 23.3523097 |
| C        | 4.3373604        | 10.5625484 | 24.8374112 |
| C        | 3.5358984        | 10.8982900 | 25.9049132 |
| S        | 1.8388049        | 10.8581332 | 25.7368445 |
| S        | 1.4063749        | 10.7655889 | 21.5255949 |
| C        | 0.0062412        | 11.7147940 | 21.3038348 |
| C        | -0.8169519       | 11.9803050 | 22.3746154 |
| C        | 0.9302191        | 8.5172952  | 23.7550528 |
| N        | 1.4484602        | 7.4568030  | 24.4953641 |
| C        | 0.7796379        | 6.2516998  | 24.3181713 |
| H        | 1.0752333        | 5.3478841  | 24.8335125 |
| C        | -0.2152681       | 6.5029914  | 23.4343106 |
| H        | -0.9783349       | 5.8662390  | 23.0075097 |
| N        | -0.1106237       | 7.8507007  | 23.1121044 |
| S        | -0.4297567       | 11.3639299 | 23.9163588 |
| H        | -0.1889307       | 12.1123995 | 20.3050743 |
| H        | -1.7130116       | 12.5987310 | 22.2815567 |
| H        | 5.4279786        | 10.5921547 | 24.8955590 |
| H        | 3.9467418        | 11.2178873 | 26.8654286 |
| Cl       | 2.7741185        | 7.5491566  | 25.5446050 |
| Cl       | -1.1923655       | 8.5508751  | 22.0137797 |

*Fe-adduct R<sub>1</sub>=COOH<sub>3</sub> R<sub>2</sub>=H*

34

|          |                  |            |            |
|----------|------------------|------------|------------|
| Energy = | -3694.2551965910 |            |            |
| Fe       | 1.3614497        | 10.0189559 | 23.7038113 |
| S        | 3.4748599        | 9.3569380  | 23.7446129 |
| C        | 4.0882905        | 9.9665441  | 25.2167544 |
| C        | 3.2561201        | 10.6482361 | 26.0674044 |
| S        | 1.6070738        | 10.8548591 | 25.6544957 |
| S        | 1.7687260        | 10.8968581 | 21.7975934 |
| C        | 0.4096551        | 11.8624997 | 21.4081388 |
| C        | -0.6808056       | 11.8673582 | 22.2396477 |
| C        | 0.6858214        | 8.2512359  | 23.6638835 |
| N        | 1.0708331        | 7.1438090  | 24.4156689 |
| C        | 0.3288365        | 6.0014628  | 24.0939851 |
| H        | 0.5042646        | 5.0505326  | 24.5783900 |
| C        | -0.5621153       | 6.3660154  | 23.1507434 |
| H        | -1.3271653       | 5.8002377  | 22.6367772 |
| N        | -0.3342109       | 7.7196043  | 22.8777652 |
| S        | -0.6574922       | 10.9325961 | 23.6684117 |
| H        | 0.4620342        | 12.4670730 | 20.5002460 |
| H        | -1.5723618       | 12.4640245 | 22.0301016 |
| H        | 5.1462361        | 9.8056361  | 25.4392446 |
| H        | 3.6019711        | 11.0870829 | 27.0056788 |
| C        | 1.9806826        | 7.1099377  | 25.5308577 |
| C        | -0.9997842       | 8.3423786  | 21.7646825 |
| O        | 2.7733684        | 6.0256700  | 25.3881856 |
| O        | -2.3176876       | 8.0612399  | 21.8550647 |
| C        | -3.1007684       | 8.5309612  | 20.7302685 |
| H        | -4.1249551       | 8.2091954  | 20.9395883 |
| H        | -2.7319869       | 8.0885626  | 19.7962659 |
| H        | -3.0410323       | 9.6241091  | 20.6648776 |
| C        | 3.6762299        | 5.7999425  | 26.4988063 |
| H        | 4.2008577        | 4.8709095  | 26.2574340 |
| H        | 3.1142091        | 5.7033206  | 27.4363300 |
| H        | 4.3820801        | 6.6356706  | 26.5802444 |
| O        | 1.9501925        | 7.8523135  | 26.4776419 |
| O        | -0.4522268       | 8.9094694  | 20.8550177 |

*Fe-adduct R<sub>1</sub>=OCH<sub>3</sub> R<sub>2</sub>=H*

30

|          |                  |            |            |
|----------|------------------|------------|------------|
| Energy = | -3467.3465227140 |            |            |
| Fe       | 1.4946386        | 10.2657962 | 23.6798247 |
| S        | 3.5790030        | 9.7421988  | 23.1547978 |
| C        | 4.4913497        | 10.1518146 | 24.5358560 |
| C        | 3.8613099        | 10.6719845 | 25.6433850 |
| S        | 2.1592331        | 10.8600568 | 25.6352974 |
| S        | 1.2957399        | 11.0262378 | 21.6794445 |
| C        | -0.1624327       | 11.9229801 | 21.6479707 |
| C        | -0.9570329       | 11.9652124 | 22.7708742 |

|   |            |            |            |
|---|------------|------------|------------|
| C | 0.8826020  | 8.4643585  | 23.7398585 |
| N | 0.8723346  | 7.5666728  | 24.7868230 |
| C | 0.3418352  | 6.3271569  | 24.4677306 |
| H | 0.2583845  | 5.5327960  | 25.1978257 |
| C | -0.0029833 | 6.3993158  | 23.1554322 |
| H | -0.4349935 | 5.6750267  | 22.4774126 |
| N | 0.3230943  | 7.6833602  | 22.7500361 |
| S | -0.4625804 | 11.1612766 | 24.1911581 |
| H | -0.4096282 | 12.4674813 | 20.7338706 |
| H | -1.8984766 | 12.5198589 | 22.7974453 |
| H | 5.5740923  | 10.0070452 | 24.4963357 |
| H | 4.4093240  | 11.0005451 | 26.5295715 |
| O | 1.2621271  | 7.8496814  | 26.0774772 |
| O | 0.1593452  | 8.0643295  | 21.4362127 |
| C | -1.1924569 | 8.5357858  | 21.2023481 |
| H | -1.2039531 | 8.8090084  | 20.1418900 |
| H | -1.4063803 | 9.4143483  | 21.8246429 |
| H | -1.9196770 | 7.7318688  | 21.3934541 |
| C | 2.6214236  | 7.4008042  | 26.3156005 |
| H | 2.8178644  | 7.6749275  | 27.3575445 |
| H | 3.3209351  | 7.9185710  | 25.6466773 |
| H | 2.6943884  | 6.3091396  | 26.1922425 |

*Fe-adduct*  $R_1=H$   $R_2=CH_2CH_3$

34

|          |                  |            |            |
|----------|------------------|------------|------------|
| Energy = | -3395.6472188120 |            |            |
| Fe       | 1.5804649        | 10.4624065 | 23.6849708 |
| S        | 3.6964562        | 10.0424910 | 23.4102189 |
| C        | 4.3777546        | 10.0931411 | 24.9779437 |
| C        | 3.5845683        | 10.3970193 | 26.0605860 |
| S        | 1.9204072        | 10.7285516 | 25.8276309 |
| S        | 1.4320512        | 10.7247364 | 21.5215502 |
| C        | -0.0834067       | 11.4817355 | 21.2686456 |
| C        | -0.8629801       | 11.8275734 | 22.3489735 |
| C        | 0.9295844        | 8.7062313  | 23.7549608 |
| N        | 1.0917547        | 7.7733675  | 24.7323563 |
| C        | 0.4267110        | 6.5723432  | 24.4570635 |
| C        | 0.5083164        | 5.4316790  | 25.4232662 |
| C        | -0.1780553       | 6.7551404  | 23.2376244 |
| C        | -1.0167831       | 5.9137800  | 22.3216922 |
| N        | 0.1515149        | 8.0566638  | 22.8456722 |
| S        | -0.3163042       | 11.4949872 | 23.9343374 |
| H        | -0.3799451       | 11.7093853 | 20.2419226 |
| H        | -1.8189824       | 12.3440658 | 22.2337185 |
| H        | 5.4501517        | 9.9087653  | 25.0775448 |
| H        | 3.9874135        | 10.4707932 | 27.0737284 |
| H        | 1.5974098        | 7.9870514  | 25.5864638 |
| H        | -0.1244841       | 8.4996673  | 21.9744294 |
| C        | -1.5001929       | 4.5691222  | 22.8682943 |
| H        | -0.4500528       | 5.7399607  | 21.3893122 |
| H        | -1.8951710       | 6.5118785  | 22.0217119 |
| H        | -0.6631993       | 3.9005028  | 23.1105500 |

|   |            |           |            |
|---|------------|-----------|------------|
| H | -2.1164956 | 4.0623751 | 22.1134543 |
| H | -2.1157676 | 4.6962088 | 23.7694854 |
| C | 1.8722053  | 4.7169778 | 25.4301689 |
| H | -0.2860233 | 4.7112681 | 25.1987461 |
| H | 0.2923001  | 5.8128057 | 26.4362843 |
| H | 2.0914658  | 4.2771205 | 24.4475542 |
| H | 1.8822428  | 3.9113662 | 26.1780065 |
| H | 2.6904306  | 5.4089081 | 25.6727621 |

*Fe-adduct R<sub>1</sub>=H R<sub>2</sub>= CCH<sub>1</sub>*

26

|                           |            |            |            |
|---------------------------|------------|------------|------------|
| Energy = -3390.6835763970 |            |            |            |
| Fe                        | 1.4939583  | 10.3327312 | 23.6722669 |
| S                         | 3.6272645  | 9.9824538  | 23.4085636 |
| C                         | 4.2927475  | 10.0647213 | 24.9810430 |
| C                         | 3.4821341  | 10.3671096 | 26.0532195 |
| S                         | 1.8160309  | 10.6581976 | 25.8028339 |
| S                         | 1.3443167  | 10.5777850 | 21.5118837 |
| C                         | -0.1955731 | 11.2705324 | 21.2452307 |
| C                         | -1.0011461 | 11.5822642 | 22.3183035 |
| C                         | 0.9554077  | 8.5581474  | 23.7714720 |
| N                         | 1.4835535  | 7.5565690  | 24.5353965 |
| C                         | 0.8256692  | 6.3394822  | 24.3571737 |
| C                         | 1.1773524  | 5.1597944  | 25.0289260 |
| C                         | -0.1753693 | 6.5868370  | 23.4279833 |
| C                         | -1.1378599 | 5.7297427  | 22.8757104 |
| N                         | -0.0609926 | 7.9385050  | 23.1011133 |
| S                         | -0.4563076 | 11.2720765 | 23.9079440 |
| H                         | -0.4923728 | 11.4815023 | 20.2151895 |
| H                         | -1.9781011 | 12.0552294 | 22.1933637 |
| H                         | 5.3676992  | 9.9040851  | 25.0932983 |
| H                         | 3.8732727  | 10.4630001 | 27.0689718 |
| H                         | 2.2675835  | 7.7041696  | 25.1632654 |
| H                         | -0.6529549 | 8.4245877  | 22.4349789 |
| C                         | 1.4986639  | 4.1503402  | 25.6228089 |
| C                         | -1.9772382 | 5.0003213  | 22.3876371 |
| H                         | -2.7133438 | 4.3502861  | 21.9618763 |
| H                         | 1.7750952  | 3.2557189  | 26.1416066 |

*Fe-adduct R<sub>1</sub>=H R<sub>2</sub>= C<sub>6</sub>H<sub>6</sub>*

42

|                           |            |            |            |
|---------------------------|------------|------------|------------|
| Energy = -3700.6229775940 |            |            |            |
| Fe                        | 1.2841788  | 9.6721399  | 23.2142915 |
| S                         | 3.2494792  | 8.8847021  | 22.6988028 |
| C                         | 4.2782471  | 9.3761686  | 23.9740006 |
| C                         | 3.7800601  | 10.1584717 | 24.9924525 |
| S                         | 2.1367751  | 10.6318722 | 24.9751406 |
| S                         | 0.6438023  | 9.1856146  | 21.1899766 |
| C                         | -0.8606471 | 9.9748578  | 20.9939830 |
| C                         | -1.3580768 | 10.7624863 | 22.0088489 |

|   |            |            |            |
|---|------------|------------|------------|
| C | 0.6119085  | 8.1515777  | 24.0615647 |
| N | 1.2227574  | 7.3593935  | 24.9863353 |
| C | 0.4217100  | 6.2950781  | 25.4056019 |
| C | -0.7705652 | 6.4356500  | 24.7206881 |
| N | -0.6075758 | 7.5618198  | 23.9105700 |
| S | -0.4677853 | 10.9440067 | 23.4577770 |
| H | -1.3807318 | 9.8607906  | 20.0398885 |
| H | -2.2974810 | 11.3117673 | 21.9109486 |
| H | 5.3289534  | 9.0796641  | 23.9300481 |
| H | 4.4110246  | 10.5220589 | 25.8071917 |
| H | 2.1903155  | 7.5001641  | 25.2595949 |
| H | -1.3348033 | 7.9687098  | 23.3305860 |
| H | 0.8676337  | 1.9350750  | 26.9678212 |
| C | 1.1101298  | 2.9899982  | 27.1037996 |
| H | 2.3254320  | 2.6488299  | 28.8612814 |
| C | 1.9318142  | 3.3886039  | 28.1632647 |
| H | -0.0077243 | 3.6091008  | 25.3665933 |
| C | 0.6108766  | 3.9308046  | 26.2045909 |
| C | 2.2494119  | 4.7401927  | 28.3181130 |
| C | 0.9160419  | 5.2970431  | 26.3558724 |
| C | 1.7452857  | 5.6870972  | 27.4259186 |
| H | 2.8860088  | 5.0625836  | 29.1431569 |
| H | 1.9757776  | 6.7437500  | 27.5759936 |
| H | -4.1656646 | 4.1498822  | 26.9306097 |
| C | -3.7703162 | 4.5166363  | 25.9822356 |
| H | -5.4417604 | 3.7846183  | 24.8192466 |
| C | -4.4895625 | 4.3161075  | 24.7993648 |
| H | -2.0150540 | 5.3796849  | 26.8915966 |
| C | -2.5570862 | 5.2025109  | 25.9626062 |
| C | -3.9830194 | 4.8061659  | 23.5931522 |
| C | -2.0317485 | 5.6917206  | 24.7516560 |
| C | -2.7648919 | 5.4862155  | 23.5667934 |
| H | -4.5337972 | 4.6513922  | 22.6644070 |
| H | -2.3644125 | 5.8379330  | 22.6139550 |

*Fe-adduct R<sub>1</sub>=H R<sub>2</sub>= Br*

22

|          |                  |            |            |
|----------|------------------|------------|------------|
| Energy = | -8386.0073946180 |            |            |
| Fe       | 1.5491072        | 10.6024348 | 23.6380405 |
| S        | 3.6855887        | 10.2560337 | 23.3859319 |
| C        | 4.3405588        | 10.3348404 | 24.9636482 |
| C        | 3.5225360        | 10.6397435 | 26.0299828 |
| S        | 1.8596051        | 10.9348218 | 25.7679836 |
| S        | 1.4095918        | 10.8486227 | 21.4780490 |
| C        | -0.1443595       | 11.5028552 | 21.2001142 |
| C        | -0.9650959       | 11.7962970 | 22.2672566 |
| C        | 1.0267899        | 8.8216312  | 23.7367219 |
| N        | 1.6356654        | 7.7949868  | 24.4064873 |
| C        | 0.9495372        | 6.5959010  | 24.2559392 |
| Br       | 1.5047010        | 5.0020359  | 25.0416800 |



|    |            |            |            |
|----|------------|------------|------------|
| C  | -0.1298556 | 6.8673676  | 23.4647585 |
| Br | -1.4885734 | 5.7554302  | 22.8453946 |
| N  | -0.0609881 | 8.2219883  | 23.1614748 |
| S  | -0.4220881 | 11.5044120 | 23.8617724 |
| H  | -0.4399206 | 11.7037569 | 20.1676230 |
| H  | -1.9518665 | 12.2461306 | 22.1339402 |
| H  | 5.4145623  | 10.1724082 | 25.0829761 |
| H  | 3.9065944  | 10.7326467 | 27.0486419 |
| H  | 2.4924127  | 7.9194705  | 24.9376660 |
| H  | -0.7319829 | 8.7321950  | 22.5955372 |

*Fe-adduct*  $R_1=H$   $R_2=COOCH_3$

34

|          |                  |            |            |
|----------|------------------|------------|------------|
| Energy = | -3694.2933516820 |            |            |
| Fe       | 1.3503554        | 10.1977512 | 23.7839104 |
| S        | 3.5184058        | 10.0368300 | 23.6604978 |
| C        | 4.0618324        | 10.0523714 | 25.2797027 |
| C        | 3.1561221        | 10.2072310 | 26.3059747 |
| S        | 1.4935457        | 10.3815262 | 25.9503395 |
| S        | 1.3353923        | 10.6028599 | 21.6411166 |
| C        | -0.2345839       | 11.1936035 | 21.3073031 |
| C        | -1.1372989       | 11.3572963 | 22.3346026 |
| C        | 0.9547805        | 8.3908918  | 23.7127112 |
| N        | 1.4267676        | 7.3722249  | 24.4858419 |
| C        | 0.8867391        | 6.1412797  | 24.1382734 |
| C        | 0.0183922        | 6.3872361  | 23.0929142 |
| N        | 0.0936119        | 7.7466857  | 22.8561401 |
| S        | -0.6832038       | 10.9690609 | 23.9359211 |
| H        | -0.4743059       | 11.4589286 | 20.2747912 |
| H        | -2.1395464       | 11.7597358 | 22.1685276 |
| H        | 5.1356903        | 9.9655438  | 25.4607962 |
| H        | 3.4655677        | 10.2526795 | 27.3525894 |
| H        | 2.1172119        | 7.4884683  | 25.2236063 |
| H        | -0.3854366       | 8.2281157  | 22.0990412 |
| C        | 1.3952420        | 4.9393414  | 24.8074173 |
| C        | -0.7780254       | 5.5302305  | 22.1606553 |
| O        | -1.7170530       | 4.6963695  | 22.6552367 |
| O        | 0.8923654        | 3.7974213  | 24.2791313 |
| C        | 1.4035931        | 2.5751214  | 24.8669862 |
| H        | 2.4921660        | 2.5221908  | 24.7415780 |
| H        | 0.9098586        | 1.7660748  | 24.3212889 |
| H        | 1.1602172        | 2.5335407  | 25.9361507 |
| C        | -2.1561365       | 4.7790417  | 24.0317642 |
| H        | -3.1682837       | 4.3607492  | 24.0347903 |
| H        | -2.1855268       | 5.8191232  | 24.3806802 |
| H        | -1.5012581       | 4.1798198  | 24.6745929 |
| O        | -0.6063977       | 5.6167520  | 20.9621968 |
| O        | 2.2015197        | 4.9878934  | 25.7225399 |

*Fe-adduct*  $R_1=H$   $R_2=OCH_3$

30

Energy = -3467.4681371960

|    |            |            |            |
|----|------------|------------|------------|
| Fe | 1.5754430  | 10.5626326 | 23.6281503 |
| S  | 3.7284920  | 10.2625098 | 23.7347580 |
| C  | 4.1277228  | 10.4545817 | 25.3859581 |
| C  | 3.1474043  | 10.7938041 | 26.2925955 |
| S  | 1.5388059  | 11.0229001 | 25.7579937 |
| S  | 1.7650466  | 10.6380477 | 21.4572777 |
| C  | 0.2580463  | 11.2239916 | 20.8970325 |
| C  | -0.7162583 | 11.5823638 | 21.8026026 |
| C  | 1.0603264  | 8.7693104  | 23.7607795 |
| N  | 1.4406703  | 7.8481097  | 24.6960786 |
| C  | 0.8547217  | 6.6030074  | 24.4798354 |
| O  | 1.0947378  | 5.5891213  | 25.3391512 |
| C  | 0.0687834  | 6.7379622  | 23.3658326 |
| O  | -0.6893774 | 5.8426119  | 22.6896637 |
| N  | 0.2232296  | 8.0678487  | 22.9466574 |
| S  | -0.4130960 | 11.4355579 | 23.4790899 |
| H  | 0.1175606  | 11.3345159 | 19.8190041 |
| H  | -1.6782137 | 11.9943232 | 21.4881519 |
| H  | 5.1729429  | 10.3329514 | 25.6798619 |
| H  | 3.3666716  | 10.9587408 | 27.3502627 |
| H  | 2.0677512  | 8.0665091  | 25.4643338 |
| H  | -0.1810581 | 8.4674992  | 22.1053622 |
| C  | -2.0861153 | 5.8192232  | 23.0845520 |
| H  | -2.5650472 | 5.0632449  | 22.4528359 |
| H  | -2.5562266 | 6.7992451  | 22.9145586 |
| H  | -2.1809672 | 5.5423879  | 24.1448965 |
| C  | 1.4448377  | 4.3281266  | 24.7217060 |
| H  | 1.6427332  | 3.6386287  | 25.5489957 |
| H  | 2.3468189  | 4.4454634  | 24.1030415 |
| H  | 0.6187537  | 3.9489597  | 24.1044108 |

*Fe-adduct R<sub>1</sub>=H R<sub>2</sub>=I*

22

Energy = -3832.8332448540

|    |            |            |            |
|----|------------|------------|------------|
| Fe | 1.5569125  | 10.6079150 | 23.6378069 |
| S  | 3.6936846  | 10.2642025 | 23.3840044 |
| C  | 4.3521374  | 10.3555872 | 24.9593987 |
| C  | 3.5347534  | 10.6578177 | 26.0268083 |
| S  | 1.8692616  | 10.9414109 | 25.7677017 |
| S  | 1.4189031  | 10.8551414 | 21.4780803 |
| C  | -0.1308240 | 11.5197335 | 21.2007059 |
| C  | -0.9495728 | 11.8173936 | 22.2682662 |
| C  | 1.0235499  | 8.8292272  | 23.7371426 |
| N  | 1.6154681  | 7.8052273  | 24.4244642 |
| C  | 0.9314096  | 6.6034798  | 24.2687130 |
| I  | 1.5326517  | 4.8394840  | 25.1562240 |
| C  | -0.1341637 | 6.8733705  | 23.4528868 |
| I  | -1.6261538 | 5.6385405  | 22.7382495 |
| N  | -0.0540735 | 8.2284819  | 23.1452795 |
| S  | -0.4090198 | 11.5194877 | 23.8623621 |

|   |            |            |            |
|---|------------|------------|------------|
| H | -0.4255842 | 11.7223422 | 20.1683577 |
| H | -1.9341867 | 12.2720846 | 22.1360825 |
| H | 5.4275712  | 10.2021926 | 25.0771944 |
| H | 3.9206127  | 10.7562794 | 27.0443306 |
| H | 2.4583220  | 7.9365908  | 24.9753478 |
| H | -0.7091493 | 8.7400095  | 22.5621829 |

*Fe-adduct R<sub>1</sub>=H R<sub>2</sub>= COCH<sub>3</sub>*

32

|                           |            |            |            |
|---------------------------|------------|------------|------------|
| Energy = -3543.7637585610 |            |            |            |
| Fe                        | 1.5026675  | 10.2986599 | 23.6886504 |
| S                         | 3.6338856  | 9.9971247  | 23.3496378 |
| C                         | 4.3586328  | 10.1339366 | 24.8907529 |
| C                         | 3.5823261  | 10.4301316 | 25.9887860 |
| S                         | 1.8992679  | 10.6593631 | 25.8008883 |
| S                         | 1.2764454  | 10.5448650 | 21.5347987 |
| C                         | -0.2778803 | 11.2216564 | 21.3202654 |
| C                         | -1.0513496 | 11.5215845 | 22.4194973 |
| C                         | 1.0001380  | 8.5258722  | 23.8101772 |
| N                         | 1.5573274  | 7.5240131  | 24.5553800 |
| C                         | 0.9221633  | 6.3053057  | 24.4064523 |
| C                         | -0.1187558 | 6.5401965  | 23.4995342 |
| N                         | -0.0252508 | 7.8806454  | 23.1766284 |
| S                         | -0.4515484 | 11.2134557 | 23.9887638 |
| H                         | -0.6118935 | 11.4276063 | 20.3007199 |
| H                         | -2.0381657 | 11.9813916 | 22.3282735 |
| H                         | 5.4413214  | 10.0062059 | 24.9620362 |
| H                         | 4.0092966  | 10.5538426 | 26.9868667 |
| H                         | 2.3592160  | 7.6291192  | 25.1756736 |
| H                         | -0.6761166 | 8.3125305  | 22.5218871 |
| C                         | 1.5034433  | 5.1988750  | 25.2138211 |
| C                         | -1.2279225 | 5.8139758  | 22.8245488 |
| C                         | -1.4935731 | 4.3487416  | 23.0491806 |
| H                         | -0.6176730 | 3.7375467  | 22.7923707 |
| H                         | -2.3393977 | 4.0556483  | 22.4184740 |
| H                         | -1.7417639 | 4.1492989  | 24.1011841 |
| C                         | 0.9533641  | 3.7975150  | 25.1799347 |
| H                         | 1.0218430  | 3.3700320  | 24.1697405 |
| H                         | -0.1036582 | 3.7748472  | 25.4777228 |
| H                         | 1.5394801  | 3.1836738  | 25.8719009 |
| O                         | 2.4705037  | 5.4789505  | 25.9219567 |
| O                         | -1.9353630 | 6.4710385  | 22.0610555 |

*Fe-adduct R<sub>1</sub>=H R<sub>2</sub>= SH*

24

|                           |           |            |            |
|---------------------------|-----------|------------|------------|
| Energy = -4034.8376437500 |           |            |            |
| Fe                        | 1.5748777 | 10.6004762 | 23.6426976 |
| S                         | 3.7127524 | 10.2848816 | 23.3645368 |
| C                         | 4.3918249 | 10.4132277 | 24.9283559 |
| C                         | 3.5844783 | 10.7177714 | 26.0023215 |

|   |            |            |            |
|---|------------|------------|------------|
| S | 1.9102978  | 10.9643181 | 25.7633828 |
| S | 1.4027236  | 10.8182159 | 21.4823457 |
| C | -0.1688962 | 11.4371186 | 21.2178066 |
| C | -0.9790221 | 11.7316318 | 22.2926961 |
| C | 1.0727454  | 8.8117224  | 23.7594893 |
| N | 1.6813868  | 7.7901313  | 24.4147585 |
| C | 0.9920695  | 6.5745261  | 24.2712850 |
| S | 1.5361828  | 5.0401421  | 24.8873667 |
| C | -0.0952980 | 6.8598947  | 23.4768468 |
| S | -1.3853758 | 5.8418824  | 22.8827841 |
| N | -0.0243649 | 8.2119729  | 23.1859052 |
| S | -0.4051979 | 11.4770834 | 23.8836228 |
| H | -0.4831122 | 11.6173778 | 20.1870300 |
| H | -1.9760862 | 12.1609804 | 22.1684428 |
| H | 5.4711370  | 10.2787440 | 25.0326306 |
| H | 3.9830833  | 10.8400263 | 27.0121675 |
| H | 2.5455185  | 7.9075991  | 24.9343533 |
| H | -0.6858791 | 8.7384527  | 22.6229554 |
| H | 0.9848743  | 5.1104876  | 26.1311342 |
| H | -0.8509101 | 4.7301154  | 23.4511749 |

*Fe-adduct*  $R_1 = \text{COCH}_3$   $R_2 = \text{H}$

32

|          |                  |            |            |
|----------|------------------|------------|------------|
| Energy = | -3543.7198395200 |            |            |
| Fe       | 1.4482160        | 10.0653405 | 23.6818413 |
| S        | 3.5812024        | 9.6369659  | 24.0196011 |
| C        | 3.9201494        | 10.2799882 | 25.5654278 |
| C        | 2.9097823        | 10.8490424 | 26.2988454 |
| S        | 1.3226100        | 10.9031859 | 25.6605432 |
| S        | 2.0018144        | 10.4666286 | 21.6409017 |
| C        | 0.6983081        | 11.3413619 | 20.9595194 |
| C        | -0.4241288       | 11.5857134 | 21.7099618 |
| C        | 0.8373840        | 8.2817797  | 23.7680682 |
| N        | 1.2927993        | 7.2461398  | 24.5706509 |
| C        | 0.6038841        | 6.0600052  | 24.3235091 |
| H        | 0.8091499        | 5.1432990  | 24.8616423 |
| C        | -0.3220248       | 6.3326725  | 23.3753433 |
| H        | -1.0496221       | 5.6882266  | 22.8981675 |
| N        | -0.1683902       | 7.6745564  | 23.0322911 |
| S        | -0.5038013       | 11.0139355 | 23.3179064 |
| H        | 0.8064970        | 11.6962322 | 19.9325071 |
| H        | -1.2783596       | 12.1434169 | 21.3189473 |
| H        | 4.9484353        | 10.2258916 | 25.9310260 |
| H        | 3.0762484        | 11.2881760 | 27.2847468 |
| C        | 2.2389020        | 7.3116830  | 25.7009383 |
| C        | -0.9195874       | 8.2186770  | 21.8819031 |
| C        | -2.4135762       | 8.2221044  | 22.0772565 |
| H        | -2.7923708       | 7.1871461  | 22.0757773 |
| H        | -2.8799139       | 8.7634310  | 21.2479848 |
| H        | -2.6862036       | 8.6750780  | 23.0378449 |
| C        | 3.4095484        | 6.3706860  | 25.5731796 |
| H        | 3.0738194        | 5.3340620  | 25.7399879 |

|   |            |           |            |
|---|------------|-----------|------------|
| H | 4.1479044  | 6.6189838 | 26.3420919 |
| H | 3.8576699  | 6.4223624 | 24.5740205 |
| O | -0.3428937 | 8.4966120 | 20.8617325 |
| O | 1.9801776  | 7.9808160 | 26.6688140 |

*Fe-adduct R<sub>1</sub>= SH R<sub>2</sub>= H*

24

|          |                  |            |            |
|----------|------------------|------------|------------|
| Energy = | -4034.7718684520 |            |            |
| Fe       | 1.3777085        | 10.2478062 | 23.6940770 |
| S        | 3.5109076        | 9.7334990  | 23.3539094 |
| C        | 4.3305529        | 10.3720402 | 24.7137823 |
| C        | 3.6174829        | 10.9887959 | 25.7119020 |
| S        | 1.9095037        | 11.0839424 | 25.5998159 |
| S        | 1.3297171        | 10.8727358 | 21.6370753 |
| C        | -0.1029844       | 11.7907781 | 21.4485063 |
| C        | -0.9805747       | 11.8963785 | 22.4997392 |
| C        | 0.7929318        | 8.4568186  | 23.8595835 |
| N        | 1.2197789        | 7.4809545  | 24.7531269 |
| C        | 0.6006704        | 6.2490962  | 24.5263875 |
| H        | 0.8279928        | 5.3831375  | 25.1345747 |
| C        | -0.2386871       | 6.4165746  | 23.4815610 |
| H        | -0.9103676       | 5.7324819  | 22.9799278 |
| N        | -0.1180112       | 7.7489880  | 23.0744498 |
| S        | -0.6166780       | 11.1458845 | 23.9854879 |
| H        | -0.2677176       | 12.2882412 | 20.4902836 |
| H        | -1.9159560       | 12.4565215 | 22.4250167 |
| H        | 5.4198037        | 10.2858124 | 24.7419947 |
| H        | 4.0964877        | 11.4488892 | 26.5788392 |
| S        | 2.2324566        | 7.6875047  | 26.1314658 |
| S        | -1.0571189       | 8.3703441  | 21.7805027 |
| H        | 3.3248172        | 8.0962296  | 25.4313705 |
| H        | -0.1779264       | 8.0646253  | 20.7896102 |

*carbene-phosphinidene adduct R<sub>2</sub>=CH<sub>3</sub> R<sub>1</sub>=H*

27

|          |                 |           |            |
|----------|-----------------|-----------|------------|
| Energy = | -878.0991688064 |           |            |
| C        | -2.7679272      | 1.5491942 | 0.5244140  |
| C        | -3.7488493      | 1.8933509 | -0.4074648 |
| C        | -3.4106379      | 2.4839259 | -1.6455758 |
| C        | -2.0428475      | 2.7410609 | -1.8863790 |
| H        | -1.7484467      | 3.2003421 | -2.8330276 |
| C        | -1.0647149      | 2.4165478 | -0.9454783 |
| H        | -0.0163101      | 2.6312355 | -1.1628863 |
| C        | -1.4181923      | 1.8092120 | 0.2641605  |
| H        | -0.6536278      | 1.5497050 | 0.9976882  |
| P        | -4.6190598      | 3.1219940 | -2.8654256 |
| C        | -7.9949910      | 1.0493364 | -3.1609831 |
| C        | -7.1667548      | 0.0040959 | -2.8950058 |
| N        | -5.8901732      | 0.5177105 | -2.7080778 |
| N        | -7.2309425      | 2.2039143 | -3.1083336 |
| C        | -5.9059437      | 1.8984464 | -2.8341597 |

|   |            |            |            |
|---|------------|------------|------------|
| H | -7.3739537 | -1.0564530 | -2.8237748 |
| H | -9.0574932 | 1.0706635  | -3.3684280 |
| C | -4.6840575 | -0.2864623 | -2.6324038 |
| C | -7.7213040 | 3.5532489  | -3.3102778 |
| H | -3.0625963 | 1.0920847  | 1.4716482  |
| H | -4.8006216 | 1.7285523  | -0.1625247 |
| H | -8.7923203 | 3.5871684  | -3.0755311 |
| H | -7.5632195 | 3.8884757  | -4.3462198 |
| H | -7.1587429 | 4.2257081  | -2.6447265 |
| H | -4.9088324 | -1.2935678 | -3.0033431 |
| H | -4.2959048 | -0.3441518 | -1.6059187 |
| H | -3.9123650 | 0.1810015  | -3.2607754 |

*carbene-phosphinidene adduct R<sub>2</sub>=CH<sub>3</sub> R<sub>1</sub>=Br*

27

|          |                  |            |            |
|----------|------------------|------------|------------|
| Energy = | -6025.7783283480 |            |            |
| C        | -1.9960757       | 2.3884440  | 0.7561459  |
| C        | -3.3544186       | 2.5179445  | 0.4619630  |
| C        | -3.8400267       | 2.3448284  | -0.8523670 |
| C        | -2.8977803       | 2.0455635  | -1.8599542 |
| H        | -3.2297144       | 1.9547609  | -2.8964590 |
| C        | -1.5423010       | 1.8978394  | -1.5616423 |
| H        | -0.8369165       | 1.6654105  | -2.3623590 |
| C        | -1.0808972       | 2.0695599  | -0.2521340 |
| H        | -0.0197942       | 1.9636760  | -0.0226374 |
| P        | -5.6062850       | 2.7234655  | -1.1616226 |
| C        | -7.2742619       | 0.6629266  | -4.1130010 |
| C        | -6.4207265       | -0.3071544 | -3.6744557 |
| N        | -5.6748194       | 0.2252419  | -2.6256456 |
| N        | -7.0382039       | 1.8032461  | -3.3547932 |
| C        | -6.0472161       | 1.5487156  | -2.4130418 |
| C        | -4.8649168       | -0.5448810 | -1.6966189 |
| C        | -7.7085917       | 3.0838758  | -3.4843516 |
| H        | -1.6513534       | 2.5296773  | 1.7823404  |
| H        | -4.0596350       | 2.7532618  | 1.2626056  |
| H        | -8.0571209       | 3.2096788  | -4.5154956 |
| H        | -6.9805535       | 3.8647022  | -3.2182980 |
| H        | -8.5641199       | 3.1587775  | -2.7972711 |
| H        | -5.1333705       | -1.6030787 | -1.7867068 |
| H        | -5.0761066       | -0.1814819 | -0.6812418 |
| H        | -3.7922273       | -0.4157398 | -1.8940484 |
| Br       | -8.5106511       | 0.5860032  | -5.5079771 |
| Br       | -6.1829358       | -2.0328038 | -4.3493126 |

*carbene-phosphinidene adduct R<sub>2</sub>=CH<sub>3</sub> R<sub>1</sub>=CH<sub>3</sub>*

33

|          |                 |           |            |
|----------|-----------------|-----------|------------|
| Energy = | -956.7653405130 |           |            |
| C        | -2.8495883      | 1.5493971 | 0.5631817  |
| C        | -3.7547257      | 1.8801341 | -0.4470404 |
| C        | -3.3350441      | 2.5407281 | -1.6240057 |

|   |            |            |            |
|---|------------|------------|------------|
| C | -1.9658908 | 2.8781273  | -1.7193870 |
| H | -1.6080339 | 3.3915561  | -2.6151631 |
| C | -1.0658574 | 2.5664839  | -0.6999053 |
| H | -0.0153050 | 2.8452843  | -0.8057938 |
| C | -1.4978181 | 1.8910235  | 0.4469957  |
| H | -0.7933330 | 1.6404486  | 1.2412282  |
| P | -4.4456825 | 3.1616148  | -2.9398975 |
| C | -7.7778963 | 1.0333045  | -3.4751785 |
| C | -6.9361932 | -0.0098300 | -3.1984578 |
| N | -5.6760750 | 0.5393575  | -2.9314720 |
| N | -7.0298135 | 2.2051973  | -3.3445589 |
| C | -5.7183969 | 1.9184602  | -3.0132606 |
| C | -7.1980163 | -1.4753994 | -3.1575503 |
| C | -9.2253728 | 1.0418252  | -3.8260466 |
| C | -4.4445897 | -0.2193597 | -2.8166036 |
| C | -7.5291187 | 3.5551501  | -3.5188491 |
| H | -3.2076428 | 1.0371425  | 1.4591077  |
| H | -4.8138972 | 1.6483473  | -0.3123286 |
| H | -8.5868094 | 3.6021393  | -3.2325724 |
| H | -7.4203042 | 3.8979474  | -4.5591191 |
| H | -6.9278585 | 4.2177258  | -2.8771230 |
| H | -4.5692645 | -1.1918652 | -3.3062894 |
| H | -4.1502266 | -0.3693772 | -1.7677827 |
| H | -3.6457090 | 0.3500292  | -3.3127701 |
| H | -9.8353641 | 1.5613447  | -3.0695967 |
| H | -9.6020336 | 0.0146364  | -3.9022196 |
| H | -9.4093050 | 1.5363747  | -4.7927349 |
| H | -8.2578623 | -1.6748640 | -3.3559028 |
| H | -6.9545286 | -1.9073572 | -2.1740342 |
| H | -6.6137334 | -2.0269572 | -3.9115196 |

*carbene-phosphinidene adduct  $R_2=CH_3$   $R_1=Cl$*

27

|          |                  |            |            |
|----------|------------------|------------|------------|
| Energy = | -1797.4207084120 |            |            |
| C        | -2.0087643       | 2.3838889  | 0.7636535  |
| C        | -3.3653623       | 2.5120166  | 0.4614406  |
| C        | -3.8437439       | 2.3375486  | -0.8554029 |
| C        | -2.8950214       | 2.0414609  | -1.8580096 |
| H        | -3.2207536       | 1.9516001  | -2.8967317 |
| C        | -1.5406925       | 1.8960190  | -1.5517576 |
| H        | -0.8301594       | 1.6657180  | -2.3485381 |
| C        | -1.0872500       | 2.0666642  | -0.2392896 |
| H        | -0.0274622       | 1.9615480  | -0.0036002 |
| P        | -5.6088301       | 2.7157493  | -1.1719416 |
| C        | -7.2782263       | 0.6601326  | -4.1246915 |
| C        | -6.4167934       | -0.3075297 | -3.6965840 |
| N        | -5.6677399       | 0.2236557  | -2.6480567 |
| N        | -7.0437578       | 1.7972630  | -3.3605524 |
| C        | -6.0472075       | 1.5428434  | -2.4251179 |
| C        | -4.8553017       | -0.5552913 | -1.7287133 |
| C        | -7.7221088       | 3.0735840  | -3.4870822 |

|    |            |            |            |
|----|------------|------------|------------|
| H  | -1.6703393 | 2.5255107  | 1.7918832  |
| H  | -4.0755677 | 2.7467720  | 1.2578215  |
| H  | -8.0927073 | 3.1890784  | -4.5115103 |
| H  | -6.9933558 | 3.8608268  | -3.2427145 |
| H  | -8.5635078 | 3.1503420  | -2.7829322 |
| H  | -5.1128249 | -1.6141967 | -1.8402128 |
| H  | -5.0745339 | -0.2132949 | -0.7074775 |
| H  | -3.7827705 | -0.4122714 | -1.9181823 |
| Cl | -8.4137866 | 0.5987620  | -5.3919952 |
| Cl | -6.2024610 | -1.8859501 | -4.3025047 |

carbene-phosphinidene adduct  $R_2=CH_3$   $R_1=COOCH_3$

39

Energy = -1334.0437003940

|   |             |            |            |
|---|-------------|------------|------------|
| C | -1.8002367  | 2.2859402  | 0.2812962  |
| C | -3.1210449  | 2.6665358  | 0.0349825  |
| C | -3.7665564  | 2.3272312  | -1.1716350 |
| C | -3.0231849  | 1.6065612  | -2.1297804 |
| H | -3.4767773  | 1.3754999  | -3.0962396 |
| C | -1.7078629  | 1.2127339  | -1.8775360 |
| H | -1.1554115  | 0.6563512  | -2.6375626 |
| C | -1.0879733  | 1.5494269  | -0.6694084 |
| H | -0.0573417  | 1.2491504  | -0.4759304 |
| P | -5.4364430  | 3.0244927  | -1.4811698 |
| C | -7.9137962  | 0.6649116  | -3.4802073 |
| C | -7.1466040  | -0.3276046 | -2.9003420 |
| N | -6.1690792  | 0.3040956  | -2.1248887 |
| N | -7.3684918  | 1.8760087  | -3.1008146 |
| C | -6.2791931  | 1.6853049  | -2.2552171 |
| C | -7.3855701  | -1.7821344 | -2.9953207 |
| C | -9.2243992  | 0.6234937  | -4.1986786 |
| C | -5.4834656  | -0.3151284 | -0.9961680 |
| C | -7.8137478  | 3.1949800  | -3.5243638 |
| H | -1.3266332  | 2.5618704  | 1.2253482  |
| H | -3.6690270  | 3.2331618  | 0.7913024  |
| H | -8.3417921  | 3.1202836  | -4.4798042 |
| H | -6.9211985  | 3.8314652  | -3.6171880 |
| H | -8.4902600  | 3.6348572  | -2.7792868 |
| H | -5.9147298  | -1.3054064 | -0.8130867 |
| H | -5.6304767  | 0.3258704  | -0.1147320 |
| H | -4.4038188  | -0.4008392 | -1.1752833 |
| O | -10.1496151 | 1.2981384  | -3.7910053 |
| O | -9.3850907  | -0.1182280 | -5.3161148 |
| O | -8.5095432  | -2.2470069 | -3.0025381 |
| O | -6.3163598  | -2.6328849 | -3.0737139 |
| C | -5.0307268  | -2.1997122 | -3.5674924 |
| C | -8.3086302  | -0.8386716 | -5.9477999 |
| H | -4.7206976  | -2.9402479 | -4.3147606 |
| H | -4.3033676  | -2.1878426 | -2.7457624 |
| H | -5.0848038  | -1.2071878 | -4.0325026 |
| H | -8.5455588  | -0.8456381 | -7.0174607 |



|   |            |            |            |
|---|------------|------------|------------|
| H | -8.2817414 | -1.8675478 | -5.5678845 |
| H | -7.3418693 | -0.3423140 | -5.7877602 |

*carbene-phosphinidene adduct R<sub>2</sub>=CH<sub>3</sub> R<sub>1</sub>=F*

27

|          |                  |            |            |
|----------|------------------|------------|------------|
| Energy = | -1076.6517716190 |            |            |
| C        | -2.0333289       | 2.3777712  | 0.7786022  |
| C        | -3.3843438       | 2.5155751  | 0.4570390  |
| C        | -3.8476873       | 2.3307907  | -0.8641608 |
| C        | -2.8881537       | 2.0175814  | -1.8512049 |
| H        | -3.2005573       | 1.9193467  | -2.8932232 |
| C        | -1.5394642       | 1.8622555  | -1.5252809 |
| H        | -0.8209389       | 1.6172208  | -2.3105498 |
| C        | -1.1016341       | 2.0406488  | -0.2085340 |
| H        | -0.0463206       | 1.9262719  | 0.0425143  |
| P        | -5.6101402       | 2.7057772  | -1.1955349 |
| C        | -7.2845199       | 0.6539594  | -4.1346008 |
| C        | -6.4116363       | -0.2988952 | -3.7299208 |
| N        | -5.6377154       | 0.2310098  | -2.7052977 |
| N        | -7.0449417       | 1.7942411  | -3.3838933 |
| C        | -6.0320626       | 1.5452222  | -2.4642154 |
| C        | -4.8518304       | -0.5783338 | -1.7861901 |
| C        | -7.7531042       | 3.0543239  | -3.5159590 |
| H        | -1.7071146       | 2.5265256  | 1.8098311  |
| H        | -4.1027939       | 2.7653935  | 1.2413602  |
| H        | -8.1414170       | 3.1462627  | -4.5367844 |
| H        | -7.0385246       | 3.8612017  | -3.2968133 |
| H        | -8.5854651       | 3.1235457  | -2.8001935 |
| H        | -5.0971587       | -1.6337195 | -1.9495890 |
| H        | -5.1067214       | -0.2809272 | -0.7589632 |
| H        | -3.7755029       | -0.4211545 | -1.9352357 |
| F        | -8.1860869       | 0.6448839  | -5.1147741 |
| F        | -6.2118452       | -1.5343486 | -4.1872579 |

*carbene-phosphinidene adduct R<sub>2</sub>=CH<sub>3</sub> R<sub>1</sub>=I*

27

|          |                  |            |            |
|----------|------------------|------------|------------|
| Energy = | -1472.6031786000 |            |            |
| C        | -1.9838497       | 2.4090081  | 0.7546036  |
| C        | -3.3399730       | 2.5404378  | 0.4530246  |
| C        | -3.8215596       | 2.3518302  | -0.8606984 |
| C        | -2.8766683       | 2.0347382  | -1.8606908 |
| H        | -3.2048063       | 1.9302692  | -2.8972405 |
| C        | -1.5227587       | 1.8847135  | -1.5545135 |
| H        | -0.8152300       | 1.6380576  | -2.3493174 |
| C        | -1.0657924       | 2.0727983  | -0.2453695 |
| H        | -0.0060078       | 1.9661183  | -0.0097848 |
| P        | -5.5846211       | 2.7386289  | -1.1754963 |
| C        | -7.2873927       | 0.6677749  | -4.1028813 |
| C        | -6.4346508       | -0.3081071 | -3.6620620 |
| N        | -5.6791712       | 0.2303142  | -2.6207574 |

|   |            |            |            |
|---|------------|------------|------------|
| N | -7.0367073 | 1.8112789  | -3.3507942 |
| C | -6.0394375 | 1.5580314  | -2.4164785 |
| C | -4.8727014 | -0.5308271 | -1.6810206 |
| C | -7.7112746 | 3.0923527  | -3.4551419 |
| H | -1.6424538 | 2.5632987  | 1.7798774  |
| H | -4.0479017 | 2.7903481  | 1.2466436  |
| H | -8.1032581 | 3.2164220  | -4.4709241 |
| H | -6.9745223 | 3.8755927  | -3.2223557 |
| H | -8.5365680 | 3.1687561  | -2.7320785 |
| H | -5.1434966 | -1.5897007 | -1.7582168 |
| H | -5.0855093 | -0.1554980 | -0.6701098 |
| H | -3.7986746 | -0.4069348 | -1.8761673 |
| I | -8.6690051 | 0.5727879  | -5.6392612 |
| I | -6.1570379 | -2.2100400 | -4.4415989 |

*carbene-phosphinidene adduct R<sub>2</sub>=CH<sub>3</sub> R<sub>1</sub>=NH<sub>2</sub>*

31

|          |                 |            |            |
|----------|-----------------|------------|------------|
| Energy = | -988.8642113279 |            |            |
| C        | -1.9724958      | 2.4379298  | 0.6447602  |
| C        | -3.3465372      | 2.5431044  | 0.4280674  |
| C        | -3.9167387      | 2.2847128  | -0.8396892 |
| C        | -3.0313272      | 1.9273441  | -1.8818192 |
| H        | -3.4240276      | 1.7701441  | -2.8889939 |
| C        | -1.6589166      | 1.8034376  | -1.6594717 |
| H        | -1.0031991      | 1.5246734  | -2.4875031 |
| C        | -1.1165540      | 2.0575532  | -0.3949418 |
| H        | -0.0428894      | 1.9676130  | -0.2241638 |
| P        | -5.7077807      | 2.6081054  | -1.0415161 |
| C        | -7.4358518      | 0.5113268  | -3.9739937 |
| C        | -6.5612469      | -0.4459641 | -3.5282334 |
| N        | -5.8044485      | 0.1091957  | -2.5052925 |
| N        | -7.1612564      | 1.6747094  | -3.2234803 |
| C        | -6.1753998      | 1.4379232  | -2.2999914 |
| C        | -4.9500870      | -0.6417306 | -1.6050813 |
| C        | -7.8336656      | 2.9480406  | -3.3858031 |
| H        | -1.5668855      | 2.6450237  | 1.6374035  |
| H        | -4.0018563      | 2.8255282  | 1.2557069  |
| H        | -8.2882109      | 2.9777753  | -4.3821667 |
| H        | -7.0917014      | 3.7493627  | -3.2557826 |
| H        | -8.6201318      | 3.0855811  | -2.6283930 |
| H        | -5.2918567      | -1.6840632 | -1.5494998 |
| H        | -5.0253528      | -0.1832735 | -0.6091947 |
| H        | -3.8975980      | -0.6178992 | -1.9198546 |
| N        | -8.3941230      | 0.5029449  | -4.9961126 |
| N        | -6.3038594      | -1.7209023 | -4.0343796 |
| H        | -6.9884684      | -1.9836146 | -4.7425521 |
| H        | -6.2461254      | -2.4528558 | -3.3255475 |
| H        | -8.0306078      | 0.4137497  | -5.9436042 |
| H        | -9.1905403      | -0.1152560 | -4.8500963 |

*carbene-phosphinidene adduct R<sub>2</sub>=CH<sub>3</sub> R<sub>1</sub>=NO<sub>2</sub>*

31

Energy = -1287.3269660050

|   |            |            |            |
|---|------------|------------|------------|
| C | -2.0750960 | 2.4347824  | 0.6341269  |
| C | -3.4226818 | 2.5832729  | 0.3003057  |
| C | -3.8858625 | 2.2894028  | -0.9984239 |
| C | -2.9451298 | 1.8586880  | -1.9560887 |
| H | -3.2644331 | 1.6675473  | -2.9826695 |
| C | -1.6004815 | 1.6991104  | -1.6167157 |
| H | -0.8898274 | 1.3629825  | -2.3739766 |
| C | -1.1584887 | 1.9861755  | -0.3207647 |
| H | -0.1054544 | 1.8699186  | -0.0614013 |
| P | -5.6274127 | 2.7160430  | -1.3795226 |
| C | -7.5108045 | 0.3835198  | -3.9266145 |
| C | -6.5999183 | -0.5511028 | -3.4852005 |
| N | -5.8026929 | 0.0600217  | -2.5334641 |
| N | -7.2460198 | 1.5662857  | -3.2934439 |
| C | -6.1668717 | 1.4032048  | -2.4101768 |
| C | -4.9925991 | -0.6439654 | -1.5398946 |
| C | -7.9024675 | 2.8471486  | -3.5255293 |
| H | -1.7416004 | 2.6683709  | 1.6465538  |
| H | -4.1312888 | 2.9304286  | 1.0554312  |
| H | -8.3290475 | 2.8717699  | -4.5323631 |
| H | -7.1407056 | 3.6301465  | -3.4069604 |
| H | -8.7016352 | 3.0077256  | -2.7901917 |
| H | -5.3551899 | -1.6709007 | -1.4389125 |
| H | -5.0972839 | -0.1056519 | -0.5902838 |
| H | -3.9358428 | -0.6611432 | -1.8309586 |
| N | -8.5645524 | 0.2564105  | -4.9132413 |
| N | -6.4498709 | -1.9137729 | -3.9016176 |
| O | -5.3119684 | -2.4059400 | -3.8018575 |
| O | -7.4599584 | -2.4928872 | -4.3198800 |
| O | -8.2715319 | -0.2563033 | -5.9924345 |
| O | -9.6722421 | 0.7022715  | -4.5817699 |

*carbene-phosphinidene adduct R<sub>2</sub>=CH<sub>3</sub> R<sub>1</sub>=OH*

29

Energy = -1028.6148108290

|   |            |            |            |
|---|------------|------------|------------|
| C | -2.0336484 | 2.4325948  | 0.6869446  |
| C | -3.3966293 | 2.5451969  | 0.4118322  |
| C | -3.9125908 | 2.2837778  | -0.8776441 |
| C | -2.9888926 | 1.9116487  | -1.8795743 |
| H | -3.3399214 | 1.7515116  | -2.9015363 |
| C | -1.6282079 | 1.7784049  | -1.5978859 |
| H | -0.9406363 | 1.4855621  | -2.3946031 |
| C | -1.1382389 | 2.0388645  | -0.3134877 |
| H | -0.0731893 | 1.9435123  | -0.0977467 |
| P | -5.6873115 | 2.6346231  | -1.1545007 |
| C | -7.4173466 | 0.5343708  | -4.0533253 |
| C | -6.5526882 | -0.4215280 | -3.6142521 |
| N | -5.7762786 | 0.1279533  | -2.6071982 |

|   |            |            |            |
|---|------------|------------|------------|
| N | -7.1282430 | 1.7048556  | -3.3367674 |
| C | -6.1361318 | 1.4597441  | -2.4088404 |
| C | -4.9681834 | -0.6543977 | -1.6862329 |
| C | -7.7732260 | 2.9864480  | -3.5359524 |
| H | -1.6685200 | 2.6454933  | 1.6937153  |
| H | -4.0848831 | 2.8377981  | 1.2085502  |
| H | -8.1180316 | 3.0568312  | -4.5751176 |
| H | -7.0347581 | 3.7712963  | -3.3148804 |
| H | -8.6284245 | 3.1234126  | -2.8562894 |
| H | -5.2544435 | -1.7081041 | -1.7748601 |
| H | -5.1591374 | -0.2870871 | -0.6678318 |
| H | -3.8959204 | -0.5435826 | -1.8965640 |
| O | -6.3507454 | -1.7083796 | -3.9975344 |
| H | -6.8934088 | -1.8727771 | -4.7907299 |
| O | -8.2609991 | 0.4930294  | -5.1299189 |
| H | -9.1857441 | 0.4075468  | -4.8289184 |

*carbene-phosphinidene adduct R<sub>2</sub>=CH<sub>3</sub> R<sub>1</sub>=COH*

31

|          |                  |            |            |
|----------|------------------|------------|------------|
| Energy = | -1104.8607868710 |            |            |
| C        | -2.7194767       | 1.4676229  | 0.5867681  |
| C        | -3.7467658       | 1.8358794  | -0.2843700 |
| C        | -3.4704586       | 2.5287242  | -1.4814694 |
| C        | -2.1300878       | 2.8722638  | -1.7485695 |
| H        | -1.8925075       | 3.4212877  | -2.6623623 |
| C        | -1.1048935       | 2.5173869  | -0.8690516 |
| H        | -0.0749508       | 2.7957089  | -1.0995736 |
| C        | -1.3929321       | 1.8057968  | 0.2989493  |
| H        | -0.5926044       | 1.5268287  | 0.9856453  |
| P        | -4.7725942       | 3.2148280  | -2.5820086 |
| C        | -7.7879147       | 0.8354956  | -3.5015228 |
| C        | -6.8665161       | -0.1648001 | -3.1910968 |
| N        | -5.6808248       | 0.4667144  | -2.8388945 |
| N        | -7.1573273       | 2.0426107  | -3.3035260 |
| C        | -5.8412376       | 1.8525803  | -2.8700045 |
| C        | -7.0463884       | -1.6145920 | -3.1359556 |
| C        | -9.1872122       | 0.6276307  | -3.8950504 |
| C        | -4.3829353       | -0.1903374 | -2.7575650 |
| C        | -7.7259535       | 3.3747166  | -3.4694259 |
| H        | -2.9585285       | 0.9293843  | 1.5060661  |
| H        | -4.7817482       | 1.6046478  | -0.0237891 |
| H        | -8.8033048       | 3.2819274  | -3.6219796 |
| H        | -7.2693884       | 3.8690236  | -4.3394394 |
| H        | -7.4835386       | 3.9672780  | -2.5747593 |
| H        | -4.4104241       | -1.1193687 | -3.3372582 |
| H        | -4.0958771       | -0.4044747 | -1.7191050 |
| H        | -3.6318128       | 0.4842679  | -3.1868726 |
| O        | -9.9592046       | 1.5213427  | -4.2291223 |
| H        | -9.4921361       | -0.4384114 | -3.8680394 |
| O        | -7.9963189       | -2.2277547 | -3.6117494 |
| H        | -6.2348564       | -2.1582782 | -2.5957481 |

carbene-phosphinidene adduct  $R_2=CH_3$   $R_1=COCH_3$

37

```
Energy = -1183.5265867110
C -1.7934975 2.4538939 0.5281395
C -3.1479955 2.7240951 0.3246199
C -3.7668764 2.4684500 -0.9166884
C -2.9625721 1.9465888 -1.9517494
H -3.3975583 1.7857977 -2.9407095
C -1.6119494 1.6623652 -1.7435057
H -1.0131808 1.2594015 -2.5629944
C -1.0181775 1.9138223 -0.5020378
H 0.0397106 1.7002690 -0.3434320
P -5.4999329 3.0324707 -1.1323213
C -7.6972627 0.8058022 -3.5802422
C -6.8299528 -0.1883064 -3.1373648
N -5.9503888 0.4056785 -2.2366688
N -7.2947789 1.9867721 -2.9761702
C -6.2051948 1.7707766 -2.1402301
C -6.7699528 -1.6156109 -3.5183189
C -8.8795053 0.7540003 -4.4841774
C -5.1994189 -0.3175363 -1.2172623
C -7.8197429 3.3248778 -3.2240258
H -1.3427674 2.6622707 1.5003113
H -3.7440831 3.1380682 1.1413752
H -8.2153600 3.3917001 -4.2404104
H -6.9885828 4.0290953 -3.0731808
H -8.6263676 3.5624027 -2.5186234
H -5.6254608 -1.3201852 -1.1001322
H -5.2964429 0.2377272 -0.2736569
H -4.1313241 -0.3872739 -1.4628066
O -9.7775949 1.5785139 -4.3265637
C -8.9570118 -0.2727288 -5.5891618
O -7.7959431 -2.2544664 -3.7444905
C -5.4030802 -2.2624507 -3.6845084
H -4.5687209 -1.5528467 -3.6347027
H -5.3960116 -2.7678827 -4.6602816
H -5.2603647 -3.0420738 -2.9218285
H -7.9719887 -0.5808809 -5.9598052
H -9.5542798 0.1585857 -6.4016869
H -9.4654080 -1.1718428 -5.2170975
```

carbene-phosphinidene adduct  $R_2=SH$   $R_1=CH_3$

carbene-phosphinidene adduct  $R_2=SH$   $R_1=CH_3$

29

```
Energy = -1674.6052939090
C -2.3692259 1.8837556 0.7637035
C -3.5840538 2.2230570 0.1609083
```

|   |            |            |            |
|---|------------|------------|------------|
| C | -3.6671400 | 2.4676445  | -1.2228413 |
| C | -2.4776130 | 2.4093959  | -1.9736879 |
| H | -2.5131588 | 2.6358750  | -3.0414598 |
| C | -1.2607099 | 2.0696472  | -1.3744127 |
| H | -0.3528486 | 2.0231715  | -1.9790760 |
| C | -1.2039202 | 1.7992444  | -0.0038163 |
| H | -0.2542150 | 1.5380432  | 0.4656050  |
| P | -5.2425968 | 3.0808255  | -1.9800900 |
| C | -7.7213240 | 0.5044647  | -3.6953465 |
| C | -6.8029730 | -0.4186095 | -3.2604922 |
| N | -5.7839133 | 0.2593392  | -2.6067499 |
| N | -7.2405639 | 1.7642170  | -3.2863951 |
| C | -6.0413752 | 1.6342478  | -2.6107932 |
| C | -4.6388002 | -0.3846940 | -1.9829344 |
| C | -7.8755417 | 3.0432466  | -3.5120786 |
| H | -2.3321184 | 1.6900877  | 1.8373601  |
| H | -4.4890844 | 2.2994449  | 0.7667750  |
| H | -8.8212297 | 2.8761150  | -4.0397089 |
| H | -7.2159048 | 3.6941804  | -4.1078783 |
| H | -8.0670695 | 3.5450355  | -2.5500657 |
| H | -4.7117111 | -1.4658632 | -2.1493390 |
| H | -4.6235364 | -0.1882882 | -0.9035886 |
| H | -3.7014219 | -0.0178020 | -2.4179162 |
| S | -6.7957642 | -2.1611236 | -3.4483258 |
| S | -9.2439886 | 0.2098859  | -4.4784077 |
| H | -7.9721588 | -2.1348874 | -4.1294360 |
| H | -8.8797188 | 0.4384432  | -5.7742120 |

carbene-phosphinidene adduct  $R_2=OCH_3$   $R_1=CH_3$

35

|          |                  |            |            |
|----------|------------------|------------|------------|
| Energy = | -1107.2389025370 |            |            |
| C        | -2.0298317       | 2.5326069  | 0.7402020  |
| C        | -3.3644276       | 2.7012030  | 0.3697536  |
| C        | -3.8253968       | 2.3343789  | -0.9148011 |
| C        | -2.8750160       | 1.8010855  | -1.8138593 |
| H        | -3.1811418       | 1.5534314  | -2.8328711 |
| C        | -1.5436813       | 1.6154276  | -1.4361648 |
| H        | -0.8334578       | 1.1997633  | -2.1546741 |
| C        | -1.1093198       | 1.9796084  | -0.1566597 |
| H        | -0.0670029       | 1.8411036  | 0.1336895  |
| P        | -5.5556611       | 2.7593414  | -1.3361591 |
| C        | -7.3098500       | 0.3997049  | -4.0095744 |
| C        | -6.5068114       | -0.5502044 | -3.4392653 |
| N        | -5.7319748       | 0.0994664  | -2.4580423 |

|   |            |            |            |
|---|------------|------------|------------|
| N | -7.0049245 | 1.6168235  | -3.4102480 |
| C | -6.0320147 | 1.4475162  | -2.4346231 |
| C | -5.0385207 | -0.6053303 | -1.3948874 |
| C | -7.6137632 | 2.8896467  | -3.7493228 |
| H | -1.7075888 | 2.8270586  | 1.7411209  |
| H | -4.0740317 | 3.1201231  | 1.0872249  |
| H | -7.9439400 | 2.8670780  | -4.7935397 |
| H | -6.8569311 | 3.6726257  | -3.5935326 |
| H | -8.4752446 | 3.1078856  | -3.1005358 |
| H | -5.3664276 | -1.6514422 | -1.4046752 |
| H | -5.2970513 | -0.1322037 | -0.4361985 |
| H | -3.9470693 | -0.5540793 | -1.5144139 |
| O | -8.2264300 | 0.3844146  | -5.0029694 |
| O | -6.4186269 | -1.8870708 | -3.6598726 |
| C | -5.3223685 | -2.2827171 | -4.5226577 |
| C | -8.9528521 | -0.8481706 | -5.1717662 |
| H | -5.3866621 | -3.3728260 | -4.6145128 |
| H | -4.3545030 | -2.0040979 | -4.0799513 |
| H | -5.4230372 | -1.8125187 | -5.5126596 |
| H | -9.7452518 | -0.6273461 | -5.8947233 |
| H | -9.3890157 | -1.1703103 | -4.2147904 |
| H | -8.3024521 | -1.6433462 | -5.5617695 |

carbene-phosphinidene adduct  $R_2=C_6H_5$   $R_1=CH_3$

47

|          |                  |            |            |
|----------|------------------|------------|------------|
| Energy = | -1340.3888411250 |            |            |
| C        | -1.8582372       | 2.3016291  | 0.3837197  |
| C        | -3.2304036       | 2.5112223  | 0.2372949  |
| C        | -3.8827991       | 2.2775705  | -0.9928905 |
| C        | -3.0888638       | 1.8334629  | -2.0726024 |
| H        | -3.5505749       | 1.6872207  | -3.0518202 |
| C        | -1.7200574       | 1.6072604  | -1.9214085 |
| H        | -1.1333727       | 1.2633074  | -2.7760519 |
| C        | -1.0932034       | 1.8406448  | -0.6925071 |
| H        | -0.0216774       | 1.6711211  | -0.5775188 |
| P        | -5.6487971       | 2.7493451  | -1.1271185 |
| C        | -7.7579124       | 0.5774962  | -3.7183676 |
| C        | -6.8982611       | -0.4150983 | -3.2955333 |
| N        | -6.0234313       | 0.1665845  | -2.3689352 |
| N        | -7.3730412       | 1.7511684  | -3.0655800 |
| C        | -6.3000347       | 1.5154432  | -2.2223407 |
| C        | -6.8436426       | -1.8319749 | -3.6727967 |
| C        | -8.8653466       | 0.5166139  | -4.6813513 |
| C        | -5.2049136       | -0.5749673 | -1.4214800 |

|   |             |            |            |
|---|-------------|------------|------------|
| C | -7.8849201  | 3.0843976  | -3.3317389 |
| H | -1.3841540  | 2.4916585  | 1.3489343  |
| H | -3.8168500  | 2.8571779  | 1.0919683  |
| H | -8.2842700  | 3.1267956  | -4.3512425 |
| H | -7.0498581  | 3.7904986  | -3.2075456 |
| H | -8.6753655  | 3.3664769  | -2.6213354 |
| H | -5.5461882  | -1.6152753 | -1.3935711 |
| H | -5.3224656  | -0.1065320 | -0.4338307 |
| H | -4.1395865  | -0.5421582 | -1.6877527 |
| C | -10.1409924 | 1.0150991  | -4.3503548 |
| C | -8.6791447  | -0.0565026 | -5.9538266 |
| C | -8.0155393  | -2.6124440 | -3.7035989 |
| C | -5.6219266  | -2.4429051 | -4.0207733 |
| C | -11.1938738 | 0.9414247  | -5.2616480 |
| H | -10.3109988 | 1.4447267  | -3.3620663 |
| C | -10.9974520 | 0.3649697  | -6.5199907 |
| C | -9.7372698  | -0.1352126 | -6.8597069 |
| H | -11.8216753 | 0.3074007  | -7.2320512 |
| H | -12.1751943 | 1.3282332  | -4.9836679 |
| H | -9.5733552  | -0.5825889 | -7.8412743 |
| H | -7.6951070  | -0.4368996 | -6.2293934 |
| C | -7.9674481  | -3.9537645 | -4.0834040 |
| H | -8.9656829  | -2.1587299 | -3.4205264 |
| C | -5.5774063  | -3.7866383 | -4.3930029 |
| C | -6.7497753  | -4.5480052 | -4.4286085 |
| H | -6.7137700  | -5.5982928 | -4.7205082 |
| H | -8.8864668  | -4.5414733 | -4.0996653 |
| H | -4.6223524  | -4.2391744 | -4.6645404 |
| H | -4.7043109  | -1.8524424 | -4.0167394 |

*Fe-adduct R<sub>1</sub>=CH<sub>3</sub> R<sub>2</sub>=H*

28

|          |                  |            |            |
|----------|------------------|------------|------------|
| Energy = | -3316.9595031560 |            |            |
| Fe       | 0.3093524        | 1.1256895  | -0.0336802 |
| S        | 2.4331241        | 0.6092662  | -0.3820596 |
| C        | 3.2540136        | 1.1890185  | 0.9989433  |
| C        | 2.5524301        | 1.8049215  | 2.0054099  |
| S        | 0.8446416        | 1.9446341  | 1.8828936  |
| S        | 0.2396699        | 1.8358402  | -2.0556787 |
| C        | -1.2463697       | 2.6790446  | -2.2194404 |
| C        | -2.1231658       | 2.7166781  | -1.1620998 |
| C        | -0.2290763       | -0.7182854 | 0.0529463  |



|   |            |            |            |
|---|------------|------------|------------|
| N | 0.1733044  | -1.6899692 | 0.9442511  |
| C | -0.4226397 | -2.9097295 | 0.6624399  |
| H | -0.2367413 | -3.7921348 | 1.2619146  |
| C | -1.2164118 | -2.7211637 | -0.4217480 |
| H | -1.8599405 | -3.4066228 | -0.9589469 |
| N | -1.1007044 | -1.3868837 | -0.7798408 |
| S | -1.7155756 | 1.9475331  | 0.3075510  |
| H | -1.4382528 | 3.1968486  | -3.1617079 |
| H | -3.0805738 | 3.2408209  | -1.2182535 |
| H | 4.3401267  | 1.0715881  | 1.0355051  |
| H | 3.0384403  | 2.2472963  | 2.8777060  |
| C | 1.1126555  | -1.5331871 | 2.0479839  |
| C | -1.7807663 | -0.8412215 | -1.9483652 |
| H | -2.6249506 | -1.4981882 | -2.1900470 |
| H | -1.0978276 | -0.7927974 | -2.8063208 |
| H | -2.1549712 | 0.1628290  | -1.7299200 |
| H | 1.0520527  | -0.5108668 | 2.4321519  |
| H | 2.1395078  | -1.7326647 | 1.7161169  |
| H | 0.8386483  | -2.2382939 | 2.8422952  |

*Fe-adduct*  $R_1=CH_3$   $R_2=OH$

30

|          |                  |            |            |
|----------|------------------|------------|------------|
| Energy = | -3467.4751138480 |            |            |
| Fe       | 1.4638300        | 10.3702680 | 23.6674347 |
| S        | 3.5957786        | 9.8647514  | 23.3599198 |
| C        | 4.3839314        | 10.4450492 | 24.7596979 |
| C        | 3.6557080        | 11.0466300 | 25.7564735 |
| S        | 1.9486322        | 11.1694188 | 25.6008154 |
| S        | 1.4347361        | 11.1065151 | 21.6540290 |
| C        | -0.0508408       | 11.9475435 | 21.4688250 |
| C        | -0.9507830       | 11.9686225 | 22.5064522 |
| C        | 0.9159501        | 8.5259347  | 23.7360873 |
| N        | 1.3215055        | 7.5413694  | 24.6215015 |
| C        | 0.7032008        | 6.3376095  | 24.3379784 |
| O        | 0.9687937        | 5.2466178  | 25.1000820 |
| C        | -0.1099774       | 6.5351358  | 23.2670569 |
| O        | -0.8467039       | 5.6195164  | 22.5684885 |
| N        | 0.0329620        | 7.8827019  | 22.9029728 |
| S        | -0.5752644       | 11.1810100 | 23.9755205 |
| H        | -0.2230749       | 12.4773217 | 20.5293047 |
| H        | -1.9075155       | 12.4920953 | 22.4347621 |
| H        | 5.4695722        | 10.3342500 | 24.8207940 |
| H        | 4.1179497        | 11.4819411 | 26.6448877 |
| C        | 2.2366633        | 7.6639493  | 25.7493164 |
| C        | -0.6022665       | 8.4309353  | 21.7121580 |
| H        | -1.4075059       | 7.7522413  | 21.4084458 |
| H        | 0.1223714        | 8.5138778  | 20.8918754 |
| H        | -1.0147123       | 9.4199278  | 21.9322230 |
| H        | 2.5522089        | 8.7048044  | 25.8328555 |
| H        | 3.1112951        | 7.0192952  | 25.5949236 |
| H        | 1.7264152        | 7.3607636  | 26.6733932 |
| H        | -1.7837097       | 5.6649153  | 22.8393771 |
| H        | 0.5590799        | 4.4731378  | 24.6706178 |

*Fe-adduct R<sub>1</sub>=CH<sub>3</sub> R<sub>2</sub>=SH*

30

|          |                  |            |            |
|----------|------------------|------------|------------|
| Energy = | -4113.4680844100 |            |            |
| Fe       | 1.4745476        | 10.4016245 | 23.6676883 |
| S        | 3.6112758        | 9.9162330  | 23.3658843 |
| C        | 4.3868347        | 10.4811418 | 24.7786809 |
| C        | 3.6490860        | 11.0643241 | 25.7799142 |
| S        | 1.9423954        | 11.1802234 | 25.6174046 |
| S        | 1.4622394        | 11.1614850 | 21.6611879 |
| C        | -0.0180064       | 12.0094069 | 21.4776422 |
| C        | -0.9231691       | 12.0256506 | 22.5116050 |
| C        | 0.9254492        | 8.5601401  | 23.7032077 |
| N        | 1.3204348        | 7.5681726  | 24.5920056 |
| C        | 0.7232055        | 6.3585063  | 24.2889752 |
| S        | 1.0081769        | 4.9186149  | 25.2401493 |
| C        | -0.0719504       | 6.5565743  | 23.1875086 |
| S        | -0.9859404       | 5.3615251  | 22.3092456 |
| N        | 0.0660273        | 7.9183549  | 22.8503823 |
| S        | -0.5578902       | 11.2237286 | 23.9740527 |
| H        | -0.1847615       | 12.5472810 | 20.5418167 |
| H        | -1.8778785       | 12.5529032 | 22.4407243 |
| H        | 5.4731445        | 10.3779401 | 24.8420032 |
| H        | 4.1056129        | 11.4920060 | 26.6751090 |
| C        | 2.2229153        | 7.7030007  | 25.7280653 |
| C        | -0.5619137       | 8.4990487  | 21.6699569 |
| H        | -1.4111837       | 7.8672101  | 21.3884799 |
| H        | 0.1509275        | 8.5365103  | 20.8356110 |
| H        | -0.9094001       | 9.5098057  | 21.8973452 |
| H        | 2.5473204        | 8.7414526  | 25.8067083 |
| H        | 3.0979067        | 7.0537331  | 25.5882852 |
| H        | 1.6992583        | 7.4180612  | 26.6520762 |
| H        | -2.1944313       | 5.5263496  | 22.9174373 |
| H        | 0.2054071        | 4.1715618  | 24.4361171 |

*Fe-adduct R<sub>1</sub>=CH<sub>3</sub> R<sub>2</sub>=I*

28

|          |                  |            |            |
|----------|------------------|------------|------------|
| Energy = | -3911.4621396460 |            |            |
| Fe       | 1.4637127        | 10.3865425 | 23.6780143 |
| S        | 3.6013433        | 9.9265607  | 23.3554258 |
| C        | 4.3861485        | 10.5132706 | 24.7532732 |
| C        | 3.6529400        | 11.0959556 | 25.7590548 |
| S        | 1.9444376        | 11.1913641 | 25.6175686 |
| S        | 1.4334824        | 11.0804375 | 21.6430253 |
| C        | -0.0354852       | 11.9466827 | 21.4578615 |
| C        | -0.9241925       | 12.0094849 | 22.5048683 |
| C        | 0.9198038        | 8.5427607  | 23.7702760 |
| N        | 1.3481498        | 7.5646894  | 24.6481494 |
| C        | 0.7373711        | 6.3440291  | 24.3716905 |
| I        | 1.0559817        | 4.6050612  | 25.4476991 |

|   |            |            |            |
|---|------------|------------|------------|
| C | -0.0863445 | 6.5420980  | 23.3004617 |
| I | -1.2932683 | 5.1554388  | 22.3474902 |
| N | 0.0212137  | 7.8858976  | 22.9486720 |
| S | -0.5490421 | 11.2475001 | 23.9862522 |
| H | -0.2099938 | 12.4584064 | 20.5088467 |
| H | -1.8716286 | 12.5494143 | 22.4319160 |
| H | 5.4744506  | 10.4258943 | 24.8037807 |
| H | 4.1155706  | 11.5359859 | 26.6451014 |
| C | 2.2959502  | 7.7265539  | 25.7434584 |
| C | -0.6674760 | 8.4610389  | 21.7996224 |
| H | -1.6346468 | 7.9588122  | 21.6821473 |
| H | -0.0730663 | 8.3240361  | 20.8861078 |
| H | -0.8319333 | 9.5253617  | 21.9755530 |
| H | 2.6250749  | 8.7652675  | 25.7740050 |
| H | 3.1598124  | 7.0673690  | 25.5892109 |
| H | 1.8102543  | 7.4700663  | 26.6945876 |

*Fe-adduct*  $R_1=CH_3$   $R_2=F$

28

|          |                  |            |            |
|----------|------------------|------------|------------|
| Energy = | -3515.5120827710 |            |            |
| Fe       | 1.4584077        | 10.3667216 | 23.6801781 |
| S        | 3.6044413        | 9.9560791  | 23.4070209 |
| C        | 4.3439414        | 10.4980627 | 24.8472701 |
| C        | 3.5758154        | 11.0304239 | 25.8553421 |
| S        | 1.8721300        | 11.1095886 | 25.6718155 |
| S        | 1.4462519        | 10.9200063 | 21.5929997 |
| C        | 0.0122847        | 11.8266238 | 21.3566277 |
| C        | -0.8645202       | 11.9998295 | 22.4020303 |
| C        | 0.9087117        | 8.5343056  | 23.7751512 |
| N        | 1.3762220        | 7.5413030  | 24.6184017 |
| C        | 0.7536305        | 6.3338102  | 24.3481679 |
| F        | 1.0320759        | 5.2337016  | 25.0431838 |
| C        | -0.1181820       | 6.5458356  | 23.3373884 |
| F        | -0.9612466       | 5.7142041  | 22.7297703 |
| N        | -0.0331814       | 7.8861551  | 22.9937986 |
| S        | -0.5102977       | 11.3222886 | 23.9298226 |
| H        | -0.1510459       | 12.2761438 | 20.3746041 |
| H        | -1.7854714       | 12.5791993 | 22.2994433 |
| H        | 5.4320888        | 10.4279173 | 24.9211063 |
| H        | 4.0097667        | 11.4387607 | 26.7707581 |
| C        | 2.3796523        | 7.6422871  | 25.6719548 |
| C        | -0.7979163       | 8.4291972  | 21.8761853 |
| H        | -1.7224461       | 7.8498579  | 21.7736041 |
| H        | -0.2203800       | 8.3628764  | 20.9451633 |
| H        | -1.0438212       | 9.4727257  | 22.0835436 |
| H        | 2.5036722        | 8.6948139  | 25.9330159 |
| H        | 3.3367983        | 7.2259465  | 25.3339879 |
| H        | 2.0312077        | 7.0872850  | 26.5517738 |

*Fe-adduct*  $R_1=CH_3$   $R_2=Cl$

28

Energy = -4236.2801349110

|    |            |            |            |
|----|------------|------------|------------|
| Fe | 1.4572315  | 10.3738493 | 23.6816558 |
| S  | 3.5965327  | 9.9226429  | 23.3820673 |
| C  | 4.3657522  | 10.4956067 | 24.7940083 |
| C  | 3.6214254  | 11.0685717 | 25.7972617 |
| S  | 1.9152131  | 11.1646331 | 25.6387202 |
| S  | 1.4378114  | 10.9969943 | 21.6202848 |
| C  | -0.0100653 | 11.8901709 | 21.4104388 |
| C  | -0.8927487 | 12.0113410 | 22.4578961 |
| C  | 0.9092738  | 8.5360924  | 23.7756373 |
| N  | 1.3587825  | 7.5519922  | 24.6367580 |
| C  | 0.7540033  | 6.3317249  | 24.3549913 |
| Cl | 1.0653426  | 4.9000109  | 25.2220985 |
| C  | -0.0910259 | 6.5345941  | 23.3072040 |
| Cl | -1.1016497 | 5.4118046  | 22.5213092 |
| N  | -0.0027977 | 7.8813972  | 22.9667741 |
| S  | -0.5311235 | 11.2887794 | 23.9625026 |
| H  | -0.1766118 | 12.3720299 | 20.4444586 |
| H  | -1.8248827 | 12.5752509 | 22.3709900 |
| H  | 5.4536763  | 10.4103802 | 24.8540510 |
| H  | 4.0751154  | 11.5006479 | 26.6918537 |
| C  | 2.3216572  | 7.6927939  | 25.7218594 |
| C  | -0.7344815 | 8.4472515  | 21.8396378 |
| H  | -1.6858370 | 7.9138401  | 21.7366857 |
| H  | -0.1558702 | 8.3412833  | 20.9124451 |
| H  | -0.9297477 | 9.5033004  | 22.0336192 |
| H  | 2.5227541  | 8.7541225  | 25.8730499 |
| H  | 3.2530861  | 7.1671681  | 25.4753635 |
| H  | 1.8978041  | 7.2677066  | 26.6405001 |

*Fe-adduct R<sub>1</sub>=CH<sub>3</sub> R<sub>2</sub>=Br*

28

Energy = -8464.6375751780

|    |            |            |            |
|----|------------|------------|------------|
| Fe | 1.4591755  | 10.3798076 | 23.6796587 |
| S  | 3.5955387  | 9.9179587  | 23.3631679 |
| C  | 4.3780167  | 10.4970149 | 24.7653696 |
| C  | 3.6435936  | 11.0785338 | 25.7710193 |
| S  | 1.9360742  | 11.1787727 | 25.6253355 |
| S  | 1.4280657  | 11.0377193 | 21.6313576 |
| C  | -0.0300670 | 11.9191237 | 21.4385697 |
| C  | -0.9125944 | 12.0120657 | 22.4888114 |
| C  | 0.9154210  | 8.5393091  | 23.7724779 |
| N  | 1.3555126  | 7.5582000  | 24.6420892 |
| C  | 0.7522960  | 6.3380839  | 24.3582074 |
| Br | 1.0738045  | 4.7686202  | 25.3142103 |
| C  | -0.0779934 | 6.5368594  | 23.2977429 |
| Br | -1.1635362 | 5.2920263  | 22.4288537 |
| N  | 0.0141739  | 7.8818688  | 22.9533127 |
| S  | -0.5403646 | 11.2689891 | 23.9805448 |
| H  | -0.2027233 | 12.4161449 | 20.4814398 |
| H  | -1.8519486 | 12.5654601 | 22.4122353 |

|   |            |            |            |
|---|------------|------------|------------|
| H | 5.4659381  | 10.4073363 | 24.8184029 |
| H | 4.1055186  | 11.5146373 | 26.6594064 |
| C | 2.2956094  | 7.7119415  | 25.7453459 |
| C | -0.6999503 | 8.4529094  | 21.8174498 |
| H | -1.6509640 | 7.9218094  | 21.6997734 |
| H | -0.1082791 | 8.3478947  | 20.8984199 |
| H | -0.8953678 | 9.5088761  | 22.0119761 |
| H | 2.5983639  | 8.7574723  | 25.8038842 |
| H | 3.1752963  | 7.0774803  | 25.5792677 |
| H | 1.8100099  | 7.4190644  | 26.6857901 |

*Fe-adduct*  $R_1=CH_3$   $R_2=NH_2$

32

|                           |            |            |            |
|---------------------------|------------|------------|------------|
| Energy = -3427.7267000460 |            |            |            |
| Fe                        | 1.4877008  | 10.3695307 | 23.6643566 |
| S                         | 3.5996541  | 9.8497285  | 23.2351953 |
| C                         | 4.4673309  | 10.4230385 | 24.5921752 |
| C                         | 3.7965253  | 11.0233060 | 25.6286833 |
| S                         | 2.0833643  | 11.1553408 | 25.5616684 |
| S                         | 1.3535234  | 11.2251723 | 21.7112165 |
| C                         | -0.1769254 | 12.0010637 | 21.6192925 |
| C                         | -1.0429288 | 11.9113697 | 22.6809530 |
| C                         | 0.9513483  | 8.5188475  | 23.7260376 |
| N                         | 1.3000827  | 7.5747985  | 24.6719256 |
| C                         | 0.6750358  | 6.3591737  | 24.4179353 |
| N                         | 0.9245419  | 5.2236470  | 25.1948061 |
| C                         | -0.0629230 | 6.5120472  | 23.2758652 |
| N                         | -0.8984311 | 5.6323439  | 22.5751966 |
| N                         | 0.1248287  | 7.8512166  | 22.8697949 |
| S                         | -0.5773717 | 11.0618841 | 24.0888136 |
| H                         | -0.4035951 | 12.5767760 | 20.7193684 |
| H                         | -2.0300538 | 12.3804624 | 22.6674478 |
| H                         | 5.5540584  | 10.3056936 | 24.5931636 |
| H                         | 4.3080017  | 11.4543381 | 26.4920548 |
| C                         | 2.1684613  | 7.7773869  | 25.8229876 |
| C                         | -0.4748122 | 8.3884091  | 21.6562229 |
| H                         | -1.2277520 | 7.6686745  | 21.3166525 |
| H                         | 0.2867517  | 8.5226351  | 20.8772090 |
| H                         | -0.9430696 | 9.3549005  | 21.8679120 |
| H                         | 2.9776473  | 8.4614767  | 25.5561711 |
| H                         | 2.5922079  | 6.8051597  | 26.1036344 |
| H                         | 1.6091870  | 8.1986229  | 26.6705942 |
| H                         | -1.6593099 | 5.2343973  | 23.1229958 |
| H                         | -0.4251195 | 4.9102161  | 22.0343100 |
| H                         | 0.5077272  | 4.3925378  | 24.7770523 |
| H                         | 0.6136330  | 5.3047443  | 26.1646276 |

*Fe-adduct*  $R_1=CH_3$   $R_2=CH_3$

34

|                           |           |            |            |
|---------------------------|-----------|------------|------------|
| Energy = -3395.6258026200 |           |            |            |
| Fe                        | 1.4609436 | 10.3818724 | 23.6832404 |

|   |            |            |            |
|---|------------|------------|------------|
| S | 3.5558770  | 9.7576382  | 23.2776000 |
| C | 4.4615491  | 10.4584222 | 24.5476317 |
| C | 3.8245094  | 11.1849989 | 25.5200395 |
| S | 2.1094004  | 11.3394432 | 25.4659071 |
| S | 1.3703185  | 11.4034239 | 21.8234182 |
| C | -0.1765051 | 12.1580656 | 21.7430648 |
| C | -1.0789724 | 11.9420479 | 22.7523413 |
| C | 0.9307414  | 8.5114634  | 23.7551532 |
| N | 1.2867467  | 7.5662397  | 24.6842196 |
| C | 0.6983646  | 6.3280176  | 24.4094125 |
| C | 0.9079705  | 5.1280264  | 25.2657785 |
| C | -0.0398832 | 6.4933446  | 23.2714480 |
| C | -0.8789252 | 5.5286868  | 22.5081440 |
| N | 0.1092658  | 7.8303339  | 22.8920874 |
| S | -0.6435866 | 10.9687324 | 24.0897563 |
| H | -0.3799973 | 12.8115194 | 20.8921650 |
| H | -2.0799514 | 12.3808301 | 22.7410307 |
| H | 5.5449385  | 10.3131540 | 24.5460891 |
| H | 4.3563826  | 11.6994129 | 26.3230966 |
| C | 2.1569825  | 7.7736320  | 25.8331972 |
| C | -0.5406154 | 8.3774783  | 21.7094323 |
| H | -1.6324775 | 8.3378748  | 21.8202458 |
| H | -0.2449722 | 7.8051804  | 20.8189757 |
| H | -0.2282099 | 9.4168122  | 21.5856980 |
| H | 2.3739918  | 8.8408517  | 25.9246299 |
| H | 3.0978535  | 7.2209892  | 25.7087472 |
| H | 1.6538482  | 7.4313845  | 26.7478812 |
| H | -0.5323539 | 5.4109340  | 21.4695467 |
| H | -1.9342897 | 5.8404778  | 22.4684911 |
| H | -0.8427298 | 4.5402608  | 22.9822081 |
| H | 0.3446707  | 4.2765488  | 24.8654792 |
| H | 0.5674581  | 5.2938753  | 26.2999236 |
| H | 1.9680967  | 4.8344765  | 25.3128301 |

*Fe-adduct R<sub>1</sub>=CH<sub>3</sub> R<sub>2</sub>= COH*

32

|          |                  |            |            |
|----------|------------------|------------|------------|
| Energy = | -3543.7040582890 |            |            |
| Fe       | 1.4273133        | 10.2306594 | 23.7031243 |
| S        | 3.5971644        | 10.1576409 | 23.5498350 |
| C        | 4.1782603        | 10.6660432 | 25.0761962 |
| C        | 3.2894374        | 10.9574424 | 26.0856097 |
| S        | 1.6092823        | 10.8148618 | 25.8066987 |
| S        | 1.4883441        | 10.4758302 | 21.5276710 |
| C        | 0.1676382        | 11.4916651 | 21.1529557 |
| C        | -0.6689941       | 11.9269476 | 22.1545734 |
| C        | 0.9031481        | 8.4015376  | 23.8165981 |
| N        | 1.4660121        | 7.3806760  | 24.5690297 |
| C        | 0.8387234        | 6.1598566  | 24.3489485 |
| C        | 1.3144191        | 4.9085523  | 24.9660660 |
| C        | -0.1748031       | 6.4015465  | 23.4356830 |
| C        | -1.1890112       | 5.5098716  | 22.8398170 |
| N        | -0.1175939       | 7.7537072  | 23.1323872 |

|   |            |            |            |
|---|------------|------------|------------|
| S | -0.3938539 | 11.4282546 | 23.7685136 |
| H | 0.0380676  | 11.7977438 | 20.1121634 |
| H | -1.4997319 | 12.6109647 | 21.9671630 |
| H | 5.2583316  | 10.7733338 | 25.2000891 |
| H | 3.6169580  | 11.3048978 | 27.0682412 |
| C | 2.6085388  | 7.5071832  | 25.4708459 |
| C | -1.0909968 | 8.3851553  | 22.2435706 |
| H | -2.1035229 | 8.0757158  | 22.5305530 |
| H | -0.9008894 | 8.1038890  | 21.1999856 |
| H | -1.0110411 | 9.4664011  | 22.3495027 |
| H | 2.8999167  | 8.5543096  | 25.5226438 |
| H | 3.4534570  | 6.9119257  | 25.1007976 |
| H | 2.3301901  | 7.1660285  | 26.4760970 |
| O | -1.5505389 | 4.4492594  | 23.3135829 |
| O | 1.0040638  | 3.7888542  | 24.6021469 |
| H | -1.6302808 | 5.8924927  | 21.8882545 |
| H | 2.0223418  | 5.0556524  | 25.8157557 |

*Fe-adduct*  $R_1=CH_3$   $R_2=OCH_3$

36

|          |                  |            |            |
|----------|------------------|------------|------------|
| Energy = | -3546.0998427860 |            |            |
| Fe       | 1.5040243        | 10.4328597 | 23.6636014 |
| S        | 3.6641711        | 9.9427187  | 23.5152286 |
| C        | 4.3529031        | 10.6137548 | 24.9282137 |
| C        | 3.5516381        | 11.2508120 | 25.8426787 |
| S        | 1.8568333        | 11.3331679 | 25.5664169 |
| S        | 1.5871751        | 11.2185732 | 21.6795517 |
| C        | 0.0569414        | 11.9401039 | 21.3729857 |
| C        | -0.9314740       | 11.8545310 | 22.3213978 |
| C        | 1.0153310        | 8.5756316  | 23.7579347 |
| N        | 1.2885379        | 7.6818315  | 24.7661199 |
| C        | 0.7456364        | 6.4254978  | 24.4818465 |
| O        | 0.8341347        | 5.3915140  | 25.3503879 |
| C        | 0.1277165        | 6.5276360  | 23.2683726 |
| O        | -0.5111391       | 5.5920379  | 22.5264562 |
| N        | 0.3027908        | 7.8474610  | 22.8362656 |
| S        | -0.6204410       | 11.0661574 | 23.8056536 |
| H        | -0.0727605       | 12.4803428 | 20.4327170 |
| H        | -1.9227022       | 12.2894786 | 22.1690314 |
| H        | 5.4341297        | 10.5271482 | 25.0630929 |
| H        | 3.9477546        | 11.7431774 | 26.7334284 |
| C        | 1.9698230        | 7.9738790  | 26.0213165 |
| C        | -0.1457581       | 8.3096158  | 21.5286254 |
| H        | -0.7301234       | 9.2297060  | 21.6359396 |
| H        | -0.7613256       | 7.5193646  | 21.0854241 |
| H        | 0.7153510        | 8.5055553  | 20.8780533 |
| H        | 1.3428983        | 8.6098396  | 26.6585340 |
| H        | 2.9144213        | 8.4891718  | 25.8191565 |
| H        | 2.1587539        | 7.0232013  | 26.5310851 |
| C        | -1.8916623       | 5.3637080  | 22.9126297 |
| C        | 1.6958641        | 4.3097019  | 24.9145212 |
| H        | 2.7249873        | 4.6710462  | 24.7703682 |

|   |            |           |            |
|---|------------|-----------|------------|
| H | 1.3207970  | 3.8707161 | 23.9794733 |
| H | 1.6700025  | 3.5638363 | 25.7166598 |
| H | -2.2684009 | 4.5863874 | 22.2389588 |
| H | -2.4845649 | 6.2828068 | 22.7941032 |
| H | -1.9463743 | 5.0191684 | 23.9548998 |

*Fe-adduct*  $R_1=CH_3$   $R_2=COOCH_3$

40

|          |                  |            |            |
|----------|------------------|------------|------------|
| Energy = | -3772.9273806390 |            |            |
| Fe       | 1.3816457        | 10.5313833 | 23.8045518 |
| S        | 3.5147727        | 10.1621571 | 23.3912159 |
| C        | 4.3281526        | 10.6263717 | 24.8184072 |
| C        | 3.6129916        | 11.0934715 | 25.8945185 |
| S        | 1.9012812        | 11.1665165 | 25.8089265 |
| S        | 1.2733838        | 11.3111053 | 21.7963778 |
| C        | -0.1787451       | 12.2153674 | 21.7196135 |
| C        | -1.0139741       | 12.2571685 | 22.8115278 |
| C        | 0.8846722        | 8.6818590  | 23.7400062 |
| N        | 1.4280616        | 7.6214461  | 24.4443885 |
| C        | 0.8520071        | 6.4142338  | 24.0628872 |
| C        | 1.1328466        | 5.0785776  | 24.6352138 |
| C        | -0.0879677       | 6.7116239  | 23.1046179 |
| C        | -1.0190891       | 5.8008046  | 22.3922702 |
| N        | -0.0666044       | 8.0851835  | 22.9295148 |
| S        | -0.5891568       | 11.4202894 | 24.2372668 |
| H        | -0.3866637       | 12.7677574 | 20.8005201 |
| H        | -1.9458625       | 12.8277843 | 22.8103044 |
| H        | 5.4190722        | 10.5619221 | 24.8299195 |
| H        | 4.0932686        | 11.4560269 | 26.8059982 |
| C        | 2.3888674        | 7.7343524  | 25.5395881 |
| C        | -0.8632235       | 8.7618025  | 21.9063127 |
| H        | -1.7771559       | 8.1833813  | 21.7448737 |
| H        | -0.2914652       | 8.8384927  | 20.9726405 |
| H        | -1.1178388       | 9.7629982  | 22.2581687 |
| H        | 2.4198525        | 8.7763459  | 25.8604979 |
| H        | 3.3828941        | 7.4091818  | 25.2159187 |
| H        | 2.0579264        | 7.1084752  | 26.3764849 |
| O        | -2.2011511       | 6.0313183  | 22.2058120 |
| O        | 0.2903575        | 4.2134245  | 24.7848368 |
| O        | -0.3789193       | 4.6903310  | 21.9693323 |
| O        | 2.4450420        | 4.9241278  | 24.9540156 |
| C        | -1.2354010       | 3.6713518  | 21.3994693 |
| C        | 2.7826041        | 3.6341562  | 25.5176889 |
| H        | -0.5580385       | 2.8799227  | 21.0664071 |
| H        | -1.8083837       | 4.0781388  | 20.5570630 |
| H        | -1.9260108       | 3.2941508  | 22.1644438 |
| H        | 2.6156697        | 2.8421221  | 24.7767863 |
| H        | 2.1704564        | 3.4306880  | 26.4053136 |
| H        | 3.8426356        | 3.7013484  | 25.7793300 |



Fe-adduct  $R_1=CH_3$   $R_2=C_6H_5$

48

Energy = -3779.2457023760

|    |            |            |            |
|----|------------|------------|------------|
| Fe | 1.3626256  | 9.9368690  | 23.7291104 |
| S  | 3.4957173  | 9.4694785  | 23.3258786 |
| C  | 4.3519361  | 10.2607261 | 24.5761611 |
| C  | 3.6660147  | 10.9620812 | 25.5350788 |
| S  | 1.9482957  | 11.0039282 | 25.4856184 |
| S  | 1.1838661  | 10.6283927 | 21.7167795 |
| C  | -0.3820366 | 11.3207370 | 21.5731732 |
| C  | -1.2376014 | 11.2829140 | 22.6452582 |
| C  | 0.9462013  | 8.0698792  | 23.9790130 |
| N  | 1.4630563  | 7.2029293  | 24.9127656 |
| C  | 0.9430573  | 5.9124406  | 24.7563919 |
| C  | 1.3709904  | 4.7512347  | 25.5501630 |
| C  | 0.0589567  | 5.9750246  | 23.7052681 |
| C  | -0.7831871 | 4.9125677  | 23.1298487 |
| N  | 0.0791770  | 7.2956013  | 23.2445474 |
| S  | -0.7318126 | 10.5654755 | 24.1123524 |
| H  | -0.6350258 | 11.8128180 | 20.6314830 |
| H  | -2.2426953 | 11.7099061 | 22.6022924 |
| H  | 5.4433618  | 10.2012517 | 24.5684547 |
| H  | 4.1654942  | 11.5331461 | 26.3207344 |
| C  | 2.3139806  | 7.5964442  | 26.0322107 |
| C  | -0.5974464 | 7.7316931  | 22.0256802 |
| H  | -1.0534506 | 6.8596662  | 21.5483977 |
| H  | 0.1327153  | 8.1848471  | 21.3466383 |
| H  | -1.3692652 | 8.4746823  | 22.2568455 |
| H  | 1.9518340  | 8.5467821  | 26.4363686 |
| H  | 3.3538824  | 7.7273369  | 25.7094569 |
| H  | 2.2615496  | 6.8202201  | 26.8020236 |
| C  | -2.1812186 | 5.0647485  | 23.0596122 |
| C  | 2.7371449  | 4.4298210  | 25.6701305 |
| C  | -0.2118700 | 3.7126021  | 22.6709115 |
| C  | -1.0166741 | 2.6938913  | 22.1579187 |
| C  | -2.4025893 | 2.8582466  | 22.0881689 |
| C  | -2.9819298 | 4.0479471  | 22.5390396 |
| H  | -4.0637259 | 4.1821597  | 22.4948375 |
| H  | -2.6409733 | 5.9823091  | 23.4306430 |
| H  | -0.5572038 | 1.7692441  | 21.8055799 |
| H  | -3.0296355 | 2.0627176  | 21.6835497 |
| H  | 0.8703060  | 3.5850988  | 22.7163127 |
| C  | 0.4257496  | 3.9151632  | 26.1717069 |
| C  | 0.8345342  | 2.7871211  | 26.8845573 |
| C  | 2.1930255  | 2.4795886  | 26.9988061 |
| C  | 3.1423880  | 3.3062054  | 26.3906359 |
| H  | 2.5109534  | 1.6002906  | 27.5606886 |
| H  | 0.0874316  | 2.1504834  | 27.3605081 |
| H  | -0.6343787 | 4.1588332  | 26.0941888 |
| H  | 3.4827514  | 5.0552594  | 25.1769247 |
| H  | 4.2046030  | 3.0698358  | 26.4693654 |

*Fe-adduct R<sub>1</sub>=CH<sub>3</sub> R<sub>2</sub>=COCH<sub>3</sub>*

38

|          |                  |            |            |
|----------|------------------|------------|------------|
| Energy = | -3622.3804342340 |            |            |
| Fe       | 1.5096082        | 10.3611137 | 23.6287057 |
| S        | 3.6257489        | 10.1589522 | 23.0078063 |
| C        | 4.5210657        | 10.7762428 | 24.3232018 |
| C        | 3.8663485        | 11.2158831 | 25.4487271 |
| S        | 2.1561621        | 11.1138447 | 25.5254939 |
| S        | 1.1664824        | 11.3229497 | 21.7353826 |
| C        | -0.4307033       | 11.9534851 | 21.7965893 |
| C        | -1.2092584       | 11.7174781 | 22.9019301 |
| C        | 1.1442946        | 8.4783263  | 23.6971498 |
| N        | 1.7234451        | 7.5382884  | 24.5400447 |
| C        | 1.1502069        | 6.2960853  | 24.3789605 |
| C        | 1.5900542        | 5.0723560  | 25.1428011 |
| C        | 0.1955372        | 6.4130339  | 23.3873712 |
| C        | -0.6172220       | 5.2823355  | 22.9048326 |
| N        | 0.2133242        | 7.7552659  | 22.9851632 |
| S        | -0.5682740       | 10.8472566 | 24.2243085 |
| H        | -0.7702894       | 12.5596568 | 20.9541249 |
| H        | -2.2335168       | 12.0902795 | 22.9831677 |
| H        | 5.6089625        | 10.8179355 | 24.2286024 |
| H        | 4.3877327        | 11.6648751 | 26.2968395 |
| C        | 2.7350839        | 7.8267652  | 25.5572561 |
| C        | -0.5485713       | 8.2780241  | 21.8560973 |
| H        | -1.6167782       | 8.3345548  | 22.0954224 |
| H        | -0.3958640       | 7.6376636  | 20.9786200 |
| H        | -0.1779441       | 9.2807887  | 21.6310751 |
| H        | 3.4460745        | 8.5536405  | 25.1585566 |
| H        | 3.2612766        | 6.8977630  | 25.7930163 |
| H        | 2.2605348        | 8.2410282  | 26.4557640 |
| O        | -0.2539735       | 4.1420008  | 23.2042942 |
| O        | 2.7652362        | 4.7397981  | 25.1002557 |
| C        | -1.8961754       | 5.4908591  | 22.1204812 |
| C        | 0.5855424        | 4.3934615  | 26.0399431 |
| H        | -1.6755364       | 5.7527040  | 21.0752380 |
| H        | -2.5151947       | 6.2957536  | 22.5393405 |
| H        | -2.4524074       | 4.5472380  | 22.1286059 |
| H        | 0.6411350        | 4.8871775  | 27.0256164 |
| H        | 0.8600600        | 3.3402258  | 26.1683895 |
| H        | -0.4417674       | 4.4786897  | 25.6720157 |

*Fe-adduct R<sub>1</sub>=CH<sub>3</sub> R<sub>2</sub>=NO<sub>2</sub>*

32

|          |                  |            |            |
|----------|------------------|------------|------------|
| Energy = | -3726.1805777660 |            |            |
| Fe       | 1.4213768        | 10.2259040 | 23.7041502 |
| S        | 3.5828674        | 9.9565788  | 23.5116788 |
| C        | 4.2435040        | 10.5354372 | 24.9740558 |
| C        | 3.4115204        | 11.0077634 | 25.9630438 |
| S        | 1.7180803        | 10.9882018 | 25.7297011 |
| S        | 1.4731411        | 10.5699110 | 21.5528208 |

|   |            |            |            |
|---|------------|------------|------------|
| C | 0.1221465  | 11.5596406 | 21.2169371 |
| C | -0.7364980 | 11.9168432 | 22.2315394 |
| C | 0.8929730  | 8.4106735  | 23.8387685 |
| N | 1.4591204  | 7.3965993  | 24.6060401 |
| C | 0.8409838  | 6.1859507  | 24.3560299 |
| N | 1.2024681  | 4.9303207  | 24.9601936 |
| C | -0.1551706 | 6.4229383  | 23.4464550 |
| N | -1.0824714 | 5.4753565  | 22.8467488 |
| N | -0.1270710 | 7.7591971  | 23.1358183 |
| S | -0.4495302 | 11.3609603 | 23.8208581 |
| H | -0.0072584 | 11.9130199 | 20.1913858 |
| H | -1.5954608 | 12.5712864 | 22.0666588 |
| H | 5.3313279  | 10.5413537 | 25.0754053 |
| H | 3.7926620  | 11.4262367 | 26.8972612 |
| C | 2.4729936  | 7.5693504  | 25.6495966 |
| C | -0.9892261 | 8.3455721  | 22.1083544 |
| H | -1.9977005 | 7.9363095  | 22.2208896 |
| H | -0.5971966 | 8.1119549  | 21.1104064 |
| H | -1.0108042 | 9.4249742  | 22.2531729 |
| H | 2.5193350  | 8.6305113  | 25.8956525 |
| H | 3.4445024  | 7.2059711  | 25.3019775 |
| H | 2.1753111  | 7.0017041  | 26.5382420 |
| O | -2.2816728 | 5.7703753  | 22.8949728 |
| O | -0.5947628 | 4.4699073  | 22.3348047 |
| O | 0.2972672  | 4.1027103  | 25.1063868 |
| O | 2.3918826  | 4.7752565  | 25.2728734 |

*Fe-adduct*  $R_1=C(CH_3)_3$   $R_2=H$

46

|          |                  |            |            |
|----------|------------------|------------|------------|
| Energy = | -3552.8984009240 |            |            |
| Fe       | 1.5367758        | 10.1388343 | 23.6194721 |
| S        | 3.2966316        | 9.2019317  | 22.6219049 |
| C        | 4.6233483        | 10.1229599 | 23.1874825 |
| C        | 4.4273290        | 11.0827753 | 24.1473021 |
| S        | 2.8469666        | 11.3178256 | 24.7862241 |
| S        | 1.2084123        | 11.4667399 | 22.0064840 |
| C        | -0.0473738       | 12.5367779 | 22.4935619 |
| C        | -0.7140019       | 12.2939640 | 23.6672781 |
| C        | 0.8262463        | 8.2578043  | 23.9421087 |
| N        | 1.0507272        | 7.4374886  | 25.0402634 |
| C        | 0.4343822        | 6.2088627  | 24.8553719 |
| C        | -0.1837537       | 6.2375045  | 23.6557139 |
| N        | 0.0447608        | 7.4846362  | 23.0939493 |
| S        | -0.2723283       | 10.9556276 | 24.6375830 |
| H        | -0.2781437       | 13.3804470 | 21.8396518 |
| H        | -1.5422018       | 12.9229830 | 24.0033334 |
| H        | 5.6128912        | 9.9073135  | 22.7767959 |
| H        | 5.2318391        | 11.7086881 | 24.5389086 |
| C        | 1.8324599        | 7.7106813  | 26.3165330 |
| C        | -0.5368939       | 7.8223889  | 21.7293219 |
| C        | -1.3687618       | 6.6322058  | 21.2162792 |
| C        | 0.5981821        | 8.0587004  | 20.7235388 |

|   |            |           |            |
|---|------------|-----------|------------|
| C | -1.4831570 | 9.0242080 | 21.8466093 |
| C | 1.2255575  | 8.9111780 | 27.0535199 |
| C | 3.3198251  | 7.9056283 | 25.9898531 |
| C | 1.7233119  | 6.4944478 | 27.2555840 |
| H | -0.7630165 | 5.7287191 | 21.0592825 |
| H | -1.7820861 | 6.9211046 | 20.2415314 |
| H | -2.2156041 | 6.3952978 | 21.8749969 |
| H | 1.2571664  | 7.1806716 | 20.6710532 |
| H | 1.2011499  | 8.9328056 | 20.9833297 |
| H | 0.1679124  | 8.2276136 | 19.7263689 |
| H | 3.5030016  | 8.7979870 | 25.3874138 |
| H | 3.7110838  | 7.0330226 | 25.4480614 |
| H | 3.8792196  | 8.0067990 | 26.9306269 |
| H | 1.2667562  | 9.8245344 | 26.4543837 |
| H | 1.7899191  | 9.0874665 | 27.9802520 |
| H | 0.1777160  | 8.7128152 | 27.3193766 |
| H | 0.6850466  | 6.2781897 | 27.5437470 |
| H | 2.2734619  | 6.7413170 | 28.1727327 |
| H | 2.1825312  | 5.5905662 | 26.8316995 |
| H | -2.2966098 | 8.8069198 | 22.5526252 |
| H | -1.9249898 | 9.2263213 | 20.8605766 |
| H | -0.9682707 | 9.9279432 | 22.1802778 |
| H | 0.4713748  | 5.4086202 | 25.5769806 |
| H | -0.7621835 | 5.4638428 | 23.1765647 |

*Fe-adduct*  $R_1=CH_3$   $R_2=OCH_3$

54

|                           |            |            |            |
|---------------------------|------------|------------|------------|
| Energy = -3782.0107741160 |            |            |            |
| Fe                        | 1.5391516  | 10.2646653 | 23.6718919 |
| S                         | 3.1842987  | 9.1313816  | 22.6653667 |
| C                         | 4.6037478  | 9.9634002  | 23.1380815 |
| C                         | 4.5264548  | 10.9683435 | 24.0661948 |
| S                         | 2.9969791  | 11.3590448 | 24.7520235 |
| S                         | 1.3432814  | 11.5299108 | 21.9917370 |
| C                         | 0.2074491  | 12.7445081 | 22.4280639 |
| C                         | -0.4654982 | 12.6387867 | 23.6210118 |
| C                         | 0.7550041  | 8.3610685  | 23.9859123 |
| N                         | 1.2278816  | 7.4826712  | 24.9457773 |
| C                         | 1.1552317  | 6.1697248  | 24.4692612 |
| C                         | 0.5037655  | 6.2049718  | 23.2687292 |
| N                         | 0.2027794  | 7.5548979  | 23.0030851 |
| S                         | -0.1521884 | 11.3257869 | 24.6680851 |
| H                         | 0.0538637  | 13.5698340 | 21.7296342 |
| H                         | -1.2202274 | 13.3694169 | 23.9225396 |
| H                         | 5.5530064  | 9.6553245  | 22.6930448 |
| H                         | 5.3939751  | 11.5389834 | 24.4039411 |
| C                         | 1.6966186  | 7.7995681  | 26.3574874 |
| C                         | -0.6340492 | 7.9880429  | 21.8064148 |
| C                         | -1.6874924 | 6.9098906  | 21.4704362 |
| C                         | 0.2835824  | 8.1918931  | 20.5920063 |
| C                         | -1.4295564 | 9.2520900  | 22.1464277 |
| C                         | 1.0445967  | 9.0947940  | 26.8494792 |

|   |            |            |            |
|---|------------|------------|------------|
| C | 3.2288206  | 7.8922607  | 26.3749509 |
| C | 1.2195072  | 6.6953410  | 27.3300693 |
| H | -1.2608219 | 6.0590203  | 20.9333564 |
| H | -2.4384141 | 7.3732993  | 20.8171276 |
| H | -2.2099408 | 6.5564370  | 22.3709544 |
| H | 0.8292140  | 7.2663130  | 20.3616316 |
| H | 1.0095880  | 8.9933941  | 20.7672094 |
| H | -0.3238442 | 8.4609044  | 19.7157917 |
| H | 3.5823973  | 8.7089877  | 25.7342448 |
| H | 3.6790323  | 6.9517687  | 26.0304762 |
| H | 3.5715768  | 8.0840880  | 27.4021266 |
| H | 1.3498776  | 9.9647311  | 26.2664937 |
| H | 1.3592488  | 9.2616598  | 27.8888829 |
| H | -0.0512803 | 9.0202479  | 26.8269446 |
| H | 0.1568765  | 6.4581864  | 27.1731885 |
| H | 1.3215663  | 7.0848123  | 28.3516733 |
| H | 1.8110785  | 5.7791428  | 27.2622893 |
| H | -2.1065960 | 9.0707079  | 22.9927284 |
| H | -2.0360477 | 9.5148145  | 21.2686886 |
| H | -0.8016296 | 10.1091253 | 22.3886452 |
| O | 1.8511777  | 5.1688364  | 25.0582417 |
| O | 0.3525621  | 5.2092344  | 22.3638882 |
| C | 1.1608662  | 3.9619039  | 25.4253027 |
| H | 1.0681084  | 3.2878370  | 24.5633994 |
| H | 0.1658642  | 4.1842238  | 25.8384351 |
| H | 1.7776029  | 3.4770965  | 26.1920066 |
| C | -0.6085319 | 4.1621408  | 22.6233919 |
| H | -0.0743672 | 3.2048189  | 22.6917407 |
| H | -1.3144248 | 4.1181972  | 21.7820769 |
| H | -1.1608922 | 4.3523195  | 23.5531007 |

*Fe-adduct*  $R_1=C(CH_3)_3$   $R_2=COOCH_3$

58

|          |                  |            |            |
|----------|------------------|------------|------------|
| Energy = | -4008.8379164960 |            |            |
| Fe       | 1.5921682        | 10.1301206 | 23.6779488 |
| S        | 3.1150494        | 8.7436525  | 22.8053380 |
| C        | 4.6114468        | 9.4109197  | 23.2986641 |
| C        | 4.6311957        | 10.4702212 | 24.1669779 |
| S        | 3.1433670        | 11.0943645 | 24.7620555 |
| S        | 1.6131623        | 11.3326926 | 21.9431442 |
| C        | 0.6826975        | 12.7302722 | 22.3010867 |
| C        | -0.0178010       | 12.7869804 | 23.4813747 |
| C        | 0.5415881        | 8.3916563  | 24.0247176 |
| N        | 0.8663290        | 7.4870524  | 25.0179748 |
| C        | 0.4023103        | 6.2149025  | 24.6733586 |
| C        | -0.3426428       | 6.3496563  | 23.5333428 |
| N        | -0.2712268       | 7.6801568  | 23.1361264 |
| S        | 0.0621517        | 11.4874005 | 24.5849420 |
| H        | 0.6752718        | 13.5373158 | 21.5653762 |
| H        | -0.6476738       | 13.6422699 | 23.7379035 |
| H        | 5.5276878        | 8.9564599  | 22.9138448 |
| H        | 5.5528453        | 10.9440499 | 24.5111004 |

|   |            |            |            |
|---|------------|------------|------------|
| C | 1.3399414  | 7.8113165  | 26.4412538 |
| C | -0.8916176 | 8.2040514  | 21.8371278 |
| C | -2.0352587 | 7.2959275  | 21.3587991 |
| C | 0.1912725  | 8.2152030  | 20.7481319 |
| C | -1.5191829 | 9.5810932  | 22.0774947 |
| C | 0.7811884  | 9.1719877  | 26.8748643 |
| C | 2.8719860  | 7.7932229  | 26.5103001 |
| C | 0.7381886  | 6.7847894  | 27.4237305 |
| H | -1.6871381 | 6.3278555  | 20.9795457 |
| H | -2.5087844 | 7.8099412  | 20.5120537 |
| H | -2.7995674 | 7.1372085  | 22.1277366 |
| H | 0.5719623  | 7.1985643  | 20.5768932 |
| H | 1.0329771  | 8.8635153  | 21.0055888 |
| H | -0.2473304 | 8.5794209  | 19.8085954 |
| H | 3.3044727  | 8.5438193  | 25.8385747 |
| H | 3.2657185  | 6.8072642  | 26.2394903 |
| H | 3.1864862  | 8.0293813  | 27.5370977 |
| H | 1.2055305  | 9.9973693  | 26.3005640 |
| H | 1.0443021  | 9.3284780  | 27.9300255 |
| H | -0.3132539 | 9.2006128  | 26.7836921 |
| H | -0.3515371 | 6.7074249  | 27.3094441 |
| H | 0.9421771  | 7.1461296  | 28.4402638 |
| H | 1.1821687  | 5.7885928  | 27.3470258 |
| H | -2.3489096 | 9.5024596  | 22.7942876 |
| H | -1.9206110 | 9.9491103  | 21.1239599 |
| H | -0.8085390 | 10.3160667 | 22.4569896 |
| C | 0.8087241  | 4.8741651  | 25.1544748 |
| C | -1.1247813 | 5.1957166  | 22.9633664 |
| O | -2.2756663 | 4.9481333  | 23.2478669 |
| O | 0.0732000  | 3.9030996  | 25.1564722 |
| O | 2.1311495  | 4.8141154  | 25.4666303 |
| O | -0.3450837 | 4.4430180  | 22.1533706 |
| C | 2.6031526  | 3.5026074  | 25.8552827 |
| H | 2.4746214  | 2.7921225  | 25.0292310 |
| H | 2.0521874  | 3.1373258  | 26.7317520 |
| H | 3.6635405  | 3.6358868  | 26.0895682 |
| C | -0.9620067 | 3.2144331  | 21.6912697 |
| H | -1.2125840 | 2.5806354  | 22.5508097 |
| H | -0.2110612 | 2.7362001  | 21.0556601 |
| H | -1.8740308 | 3.4344612  | 21.1216586 |

*Fe-adduct*  $R_1=C(CH_3)_3$   $R_2=OH$

48

|          |                  |            |            |
|----------|------------------|------------|------------|
| Energy = | -3703.3967398720 |            |            |
| Fe       | 1.4952049        | 10.1868332 | 23.6783910 |
| S        | 3.1432089        | 9.0797945  | 22.6456026 |
| C        | 4.5588485        | 9.9205634  | 23.1139238 |
| C        | 4.4788301        | 10.9173165 | 24.0510055 |
| S        | 2.9508262        | 11.2864276 | 24.7517195 |
| S        | 1.2618728        | 11.4553662 | 22.0041368 |
| C        | 0.1097876        | 12.6476819 | 22.4589472 |
| C        | -0.5522146       | 12.5212919 | 23.6560224 |
| C        | 0.7441388        | 8.2764637  | 23.9878862 |

|   |            |            |            |
|---|------------|------------|------------|
| N | 1.2429641  | 7.3909402  | 24.9417814 |
| C | 1.1762574  | 6.0987737  | 24.4469932 |
| C | 0.5333630  | 6.1340675  | 23.2545317 |
| N | 0.2265013  | 7.4776480  | 22.9844207 |
| S | -0.2074441 | 11.2063327 | 24.6903097 |
| H | -0.0641973 | 13.4751056 | 21.7679016 |
| H | -1.3191009 | 13.2349444 | 23.9674146 |
| H | 5.5076106  | 9.6258431  | 22.6587225 |
| H | 5.3434388  | 11.4932092 | 24.3871721 |
| C | 1.7046905  | 7.6892327  | 26.3599902 |
| C | -0.6635503 | 7.8722033  | 21.8181645 |
| C | -1.7007037 | 6.7504418  | 21.5611011 |
| C | 0.1989924  | 8.0719929  | 20.5638911 |
| C | -1.4773419 | 9.1248149  | 22.1569261 |
| C | 1.0642441  | 8.9837278  | 26.8667389 |
| C | 3.2376767  | 7.7689259  | 26.3761978 |
| C | 1.2097134  | 6.5712388  | 27.3055585 |
| H | -1.2831754 | 5.9075181  | 20.9983002 |
| H | -2.5103016 | 7.1692091  | 20.9498489 |
| H | -2.1536147 | 6.3970858  | 22.5001679 |
| H | 0.7718043  | 7.1619967  | 20.3372335 |
| H | 0.8999209  | 8.9047718  | 20.6943991 |
| H | -0.4486763 | 8.2955332  | 19.7040017 |
| H | 3.5956895  | 8.5839057  | 25.7349045 |
| H | 3.6825546  | 6.8257520  | 26.0310666 |
| H | 3.5842746  | 7.9568406  | 27.4025365 |
| H | 1.3914403  | 9.8618867  | 26.3078554 |
| H | 1.3625229  | 9.1211282  | 27.9153029 |
| H | -0.0318264 | 8.9256840  | 26.8251628 |
| H | 0.1283964  | 6.4080509  | 27.1901257 |
| H | 1.3879111  | 6.9059176  | 28.3360438 |
| H | 1.7286016  | 5.6200138  | 27.1631368 |
| H | -2.1008271 | 8.9607610  | 23.0464206 |
| H | -2.1365340 | 9.3387565  | 21.3041705 |
| H | -0.8560786 | 10.0042787 | 22.3291819 |
| O | 1.7538303  | 5.0197550  | 25.0380950 |
| O | 0.4572491  | 5.0657983  | 22.3973204 |
| H | 1.6989577  | 4.2951842  | 24.3835595 |
| H | -0.4503564 | 4.7078808  | 22.3831256 |

*Fe-adduct*  $R_1=C(CH_3)_3$   $R_2=COH$

50

|          |                  |            |            |
|----------|------------------|------------|------------|
| Energy = | -3779.6213777150 |            |            |
| Fe       | 1.5122137        | 10.1157002 | 23.6424201 |
| S        | 3.1424035        | 8.9774929  | 22.6095482 |
| C        | 4.5775617        | 9.7834100  | 23.0769705 |
| C        | 4.5198970        | 10.7893372 | 24.0046554 |
| S        | 3.0009537        | 11.1984387 | 24.6989706 |
| S        | 1.2602272        | 11.3820888 | 21.9670774 |
| C        | 0.1516017        | 12.6074135 | 22.4320701 |
| C        | -0.4823643       | 12.5100091 | 23.6464108 |
| C        | 0.7384468        | 8.2549229  | 23.9861167 |

|   |            |            |            |
|---|------------|------------|------------|
| N | 1.2118012  | 7.3953951  | 24.9490996 |
| C | 1.0380595  | 6.0682553  | 24.5315267 |
| C | 0.2779805  | 6.0998441  | 23.3845812 |
| N | 0.0701648  | 7.4252444  | 23.0601827 |
| S | -0.1389463 | 11.1999646 | 24.6852006 |
| H | -0.0156059 | 13.4317546 | 21.7359899 |
| H | -1.2220927 | 13.2449881 | 23.9728810 |
| H | 5.5176660  | 9.4617520  | 22.6225056 |
| H | 5.3954162  | 11.3531666 | 24.3326610 |
| C | 1.6574754  | 7.7141031  | 26.3733014 |
| C | -0.7241426 | 7.8797038  | 21.8338101 |
| C | -1.7043035 | 6.7829131  | 21.3925083 |
| C | 0.2476300  | 8.1451868  | 20.6742057 |
| C | -1.5687394 | 9.1066152  | 22.1936394 |
| C | 1.0425112  | 9.0303464  | 26.8578564 |
| C | 3.1907215  | 7.7671787  | 26.4322995 |
| C | 1.0958557  | 6.6276673  | 27.3185254 |
| H | -1.2050195 | 5.9282502  | 20.9194054 |
| H | -2.3562439 | 7.2246938  | 20.6273581 |
| H | -2.3347650 | 6.4180020  | 22.2119580 |
| H | 0.8157835  | 7.2359897  | 20.4305878 |
| H | 0.9539093  | 8.9484424  | 20.8987387 |
| H | -0.3293405 | 8.4325191  | 19.7839262 |
| H | 3.5790592  | 8.5610734  | 25.7821333 |
| H | 3.6451801  | 6.8152661  | 26.1250733 |
| H | 3.5084525  | 7.9770810  | 27.4632885 |
| H | 1.4367225  | 9.8976337  | 26.3268919 |
| H | 1.2911452  | 9.1466524  | 27.9217471 |
| H | -0.0513091 | 9.0189605  | 26.7606283 |
| H | 0.0096728  | 6.5202858  | 27.1954441 |
| H | 1.2880867  | 6.9504073  | 28.3501242 |
| H | 1.5600657  | 5.6425189  | 27.2040197 |
| H | -2.2798134 | 8.8645242  | 22.9954253 |
| H | -2.1412690 | 9.4011626  | 21.3037944 |
| H | -0.9696995 | 9.9619875  | 22.5103122 |
| C | 1.7396392  | 4.8565403  | 24.9334059 |
| C | -0.1656501 | 4.8018115  | 22.7335507 |
| O | -1.2284517 | 4.2734644  | 22.9821759 |
| O | 1.5091362  | 3.7719257  | 24.4025738 |
| H | 2.5523144  | 4.9513910  | 25.6829465 |
| H | 0.5707919  | 4.3589742  | 22.0247156 |

*Fe-adduct*  $R_1=C(CH_3)_3$   $R_2=CH_3$

52

|          |                  |            |            |
|----------|------------------|------------|------------|
| Energy = | -3631.5370203970 |            |            |
| Fe       | 1.5269852        | 10.0693755 | 23.6511845 |
| S        | 3.0952338        | 8.8135746  | 22.6532154 |
| C        | 4.5609971        | 9.5925721  | 23.0721515 |
| C        | 4.5506665        | 10.6308688 | 23.9660026 |
| S        | 3.0552083        | 11.1245361 | 24.6625032 |
| S        | 1.3684011        | 11.2552698 | 21.9107243 |
| C        | 0.3089543        | 12.5511921 | 22.3042109 |



|   |            |            |            |
|---|------------|------------|------------|
| C | -0.3431598 | 12.5455927 | 23.5131577 |
| C | 0.6773135  | 8.2090163  | 24.0577858 |
| N | 1.1591088  | 7.3405068  | 25.0172010 |
| C | 1.1051623  | 6.0205163  | 24.5437390 |
| C | 1.7238126  | 4.8078792  | 25.1646463 |
| C | 0.4711712  | 6.0529400  | 23.3332420 |
| C | 0.2956332  | 4.8862347  | 22.4123357 |
| N | 0.1378352  | 7.3942760  | 23.0788802 |
| S | -0.0823207 | 11.2735814 | 24.6226874 |
| H | 0.1853497  | 13.3466431 | 21.5662826 |
| H | -1.0483149 | 13.3336041 | 23.7891532 |
| H | 5.4861162  | 9.2274007  | 22.6192201 |
| H | 5.4518203  | 11.1692614 | 24.2668460 |
| C | 1.5837127  | 7.7064118  | 26.4276483 |
| C | -0.8241664 | 7.8163764  | 21.9767798 |
| C | -1.9540874 | 6.7677840  | 21.8529942 |
| C | -0.0713865 | 7.9608539  | 20.6454557 |
| C | -1.5255400 | 9.1301965  | 22.3392893 |
| C | 0.9274044  | 9.0241644  | 26.8540922 |
| C | 3.1143923  | 7.8142500  | 26.5048693 |
| C | 1.0632609  | 6.6428922  | 27.4222081 |
| H | -1.6517680 | 5.8483300  | 21.3448783 |
| H | -2.7627297 | 7.2119931  | 21.2584130 |
| H | -2.3664778 | 6.5129327  | 22.8394868 |
| H | 0.4213843  | 7.0249478  | 20.3489190 |
| H | 0.6924275  | 8.7452437  | 20.7133302 |
| H | -0.7794146 | 8.2367069  | 19.8512209 |
| H | 3.4847824  | 8.6057606  | 25.8419095 |
| H | 3.6037421  | 6.8717311  | 26.2243936 |
| H | 3.4123930  | 8.0575394  | 27.5349363 |
| H | 1.2757603  | 9.8720481  | 26.2617574 |
| H | 1.1921447  | 9.2165693  | 27.9028777 |
| H | -0.1668155 | 8.9664746  | 26.7773136 |
| H | 0.0081460  | 6.4017650  | 27.2304912 |
| H | 1.1304117  | 7.0668831  | 28.4327286 |
| H | 1.6451199  | 5.7175436  | 27.4247356 |
| H | -2.0357082 | 9.0546133  | 23.3084445 |
| H | -2.2779614 | 9.3324608  | 21.5646457 |
| H | -0.8446115 | 9.9816518  | 22.3741598 |
| H | 1.9495703  | 4.0812309  | 24.3733822 |
| H | 1.0668898  | 4.3012753  | 25.8868672 |
| H | 2.6704558  | 5.0350556  | 25.6693401 |
| H | -0.6639449 | 4.3645593  | 22.5404225 |
| H | 1.0882630  | 4.1538396  | 22.6134980 |
| H | 0.3883466  | 5.1723838  | 21.3584323 |

*Fe-adduct*  $R_1=C(CH_3)_3$   $R_2=F$

46

|          |                  |            |            |
|----------|------------------|------------|------------|
| Energy = | -3751.4371853510 |            |            |
| Fe       | 1.4918995        | 10.2088901 | 23.6911040 |
| S        | 3.1775177        | 9.1564851  | 22.6613235 |
| C        | 4.5652798        | 10.0256303 | 23.1591998 |
| C        | 4.4493688        | 11.0055531 | 24.1105984 |

|   |            |            |            |
|---|------------|------------|------------|
| S | 2.9053167  | 11.3261088 | 24.8000890 |
| S | 1.2646715  | 11.4969369 | 22.0289765 |
| C | 0.0830158  | 12.6597604 | 22.4815201 |
| C | -0.5995112 | 12.5019430 | 23.6634416 |
| C | 0.7946079  | 8.2814962  | 23.9710954 |
| N | 1.3029054  | 7.3995688  | 24.9167997 |
| C | 1.2771063  | 6.1144509  | 24.3982942 |
| C | 0.6729915  | 6.1617266  | 23.1925360 |
| N | 0.3090713  | 7.4769812  | 22.9444134 |
| S | -0.2503241 | 11.1771574 | 24.6831263 |
| H | -0.0934979 | 13.4945810 | 21.8000547 |
| H | -1.3858573 | 13.1955839 | 23.9712874 |
| H | 5.5263877  | 9.7626991  | 22.7105876 |
| H | 5.2962940  | 11.5967819 | 24.4648358 |
| C | 1.7629925  | 7.6832950  | 26.3406656 |
| C | -0.6009878 | 7.8423579  | 21.7735336 |
| C | -1.6265589 | 6.7048535  | 21.5576396 |
| C | 0.2591967  | 8.0290359  | 20.5167623 |
| C | -1.4144515 | 9.0967905  | 22.0993418 |
| C | 1.0553867  | 8.9292907  | 26.8783368 |
| C | 3.2895033  | 7.8406639  | 26.3464028 |
| C | 1.3414594  | 6.5122141  | 27.2567487 |
| H | -1.1946462 | 5.8074324  | 21.1069387 |
| H | -2.3989290 | 7.0812146  | 20.8748459 |
| H | -2.1212582 | 6.4306771  | 22.5001992 |
| H | 0.8265870  | 7.1162053  | 20.2877480 |
| H | 0.9646868  | 8.8598858  | 20.6403112 |
| H | -0.3905599 | 8.2502375  | 19.6584883 |
| H | 3.6044172  | 8.6913266  | 25.7301952 |
| H | 3.7786220  | 6.9318533  | 25.9695219 |
| H | 3.6336047  | 8.0111088  | 27.3765384 |
| H | 1.3134249  | 9.8321627  | 26.3218826 |
| H | 1.3703431  | 9.0743702  | 27.9208413 |
| H | -0.0356197 | 8.8019732  | 26.8619820 |
| H | 0.2796554  | 6.2615951  | 27.1221540 |
| H | 1.4763925  | 6.8407160  | 28.2955186 |
| H | 1.9423458  | 5.6095604  | 27.1140524 |
| H | -2.0126495 | 8.9561139  | 23.0091903 |
| H | -2.0980581 | 9.2746715  | 21.2579156 |
| H | -0.7956060 | 9.9867334  | 22.2223118 |
| F | 1.8332797  | 5.0464157  | 24.9708312 |
| F | 0.5135937  | 5.1495702  | 22.3392189 |

*Fe-adduct*  $R_1=C(CH_3)_3$   $R_2=Cl$

46

|          |                  |            |            |
|----------|------------------|------------|------------|
| Energy = | -4472.1945973410 |            |            |
| Fe       | 1.5318116        | 10.2306755 | 23.6627237 |
| S        | 3.1865654        | 9.1710770  | 22.5779207 |
| C        | 4.5922270        | 10.0159634 | 23.0612181 |
| C        | 4.5086385        | 10.9792653 | 24.0333010 |
| S        | 2.9833275        | 11.3077662 | 24.7572692 |
| S        | 1.3024949        | 11.5159491 | 21.9958913 |
| C        | 0.1558453        | 12.7064081 | 22.4665618 |

|    |            |            |            |
|----|------------|------------|------------|
| C  | -0.5080722 | 12.5696580 | 23.6616328 |
| C  | 0.8463690  | 8.2892309  | 23.9489350 |
| N  | 1.4277058  | 7.4184404  | 24.8566081 |
| C  | 1.5579232  | 6.1612550  | 24.2657613 |
| C  | 0.9442643  | 6.2105074  | 23.0502437 |
| N  | 0.4292790  | 7.4977120  | 22.8872151 |
| S  | -0.1695487 | 11.2435323 | 24.6822847 |
| H  | -0.0135936 | 13.5429330 | 21.7853543 |
| H  | -1.2716537 | 13.2833611 | 23.9809209 |
| H  | 5.5394508  | 9.7541676  | 22.5833173 |
| H  | 5.3692607  | 11.5552650 | 24.3792589 |
| C  | 1.7071310  | 7.6785307  | 26.3317485 |
| C  | -0.6251250 | 7.8403135  | 21.8353595 |
| C  | -1.6723750 | 6.7046773  | 21.8128303 |
| C  | 0.0537112  | 8.0152273  | 20.4696855 |
| C  | -1.3895085 | 9.1093409  | 22.2192854 |
| C  | 1.0097971  | 8.9600249  | 26.7926753 |
| C  | 3.2235714  | 7.7799675  | 26.5542619 |
| C  | 1.0826630  | 6.5313703  | 27.1556967 |
| H  | -1.2907323 | 5.7586255  | 21.4209129 |
| H  | -2.5002964 | 7.0227657  | 21.1656369 |
| H  | -2.0800745 | 6.5338103  | 22.8191526 |
| H  | 0.5917556  | 7.1099863  | 20.1616434 |
| H  | 0.7615523  | 8.8540034  | 20.4968304 |
| H  | -0.7099669 | 8.2334281  | 19.7104420 |
| H  | 3.6405084  | 8.6156597  | 25.9769009 |
| H  | 3.7407700  | 6.8570473  | 26.2636901 |
| H  | 3.4216671  | 7.9629922  | 27.6198011 |
| H  | 1.4405308  | 9.8561578  | 26.3415613 |
| H  | 1.1374512  | 9.0343705  | 27.8816301 |
| H  | -0.0658704 | 8.9355870  | 26.5744979 |
| H  | 0.0107897  | 6.4340375  | 26.9329141 |
| H  | 1.1824709  | 6.7872911  | 28.2189208 |
| H  | 1.5651728  | 5.5625462  | 27.0018854 |
| H  | -1.8393074 | 9.0233855  | 23.2163221 |
| H  | -2.1962634 | 9.2386099  | 21.4845202 |
| H  | -0.7661027 | 10.0053254 | 22.1959529 |
| Cl | 2.4913037  | 4.8386644  | 24.8226221 |
| Cl | 1.0059414  | 4.9578064  | 21.8855716 |

*Fe-adduct*  $R_1=C(CH_3)_3$   $R_2=Br$

46

|          |                  |            |            |
|----------|------------------|------------|------------|
| Energy = | -8700.5498026160 |            |            |
| Fe       | 1.5477862        | 10.2294222 | 23.6540518 |
| S        | 3.1943562        | 9.1576668  | 22.5661895 |
| C        | 4.6070285        | 9.9884918  | 23.0518220 |
| C        | 4.5316838        | 10.9527380 | 24.0237136 |
| S        | 3.0088263        | 11.2959605 | 24.7457334 |
| S        | 1.3179972        | 11.5040613 | 21.9793643 |
| C        | 0.1809262        | 12.7050652 | 22.4461208 |
| C        | -0.4763594       | 12.5829908 | 23.6464061 |
| C        | 0.8559585        | 8.2903210  | 23.9444443 |

|    |            |            |            |
|----|------------|------------|------------|
| N  | 1.4388891  | 7.4195434  | 24.8510042 |
| C  | 1.5751303  | 6.1642213  | 24.2559390 |
| C  | 0.9610529  | 6.2152355  | 23.0391206 |
| N  | 0.4397596  | 7.5009424  | 22.8806967 |
| S  | -0.1404124 | 11.2639554 | 24.6766387 |
| H  | 0.0122306  | 13.5366566 | 21.7587458 |
| H  | -1.2331010 | 13.3047514 | 23.9639346 |
| H  | 5.5525031  | 9.7177434  | 22.5752961 |
| H  | 5.3973247  | 11.5214324 | 24.3695325 |
| C  | 1.6933481  | 7.6852965  | 26.3306258 |
| C  | -0.6363127 | 7.8499130  | 21.8502160 |
| C  | -1.6837243 | 6.7153584  | 21.8457719 |
| C  | 0.0120487  | 8.0372553  | 20.4716717 |
| C  | -1.3932475 | 9.1164936  | 22.2565043 |
| C  | 0.9883792  | 8.9683425  | 26.7759307 |
| C  | 3.2048770  | 7.7937271  | 26.5820299 |
| C  | 1.0530483  | 6.5416922  | 27.1458110 |
| H  | -1.3055883 | 5.7647236  | 21.4612285 |
| H  | -2.5162461 | 7.0269126  | 21.2009011 |
| H  | -2.0831640 | 6.5554508  | 22.8571526 |
| H  | 0.5436185  | 7.1361099  | 20.1422094 |
| H  | 0.7194580  | 8.8765947  | 20.4906247 |
| H  | -0.7694508 | 8.2619404  | 19.7324933 |
| H  | 3.6280076  | 8.6316435  | 26.0123556 |
| H  | 3.7336998  | 6.8738955  | 26.3033905 |
| H  | 3.3811684  | 7.9789709  | 27.6510455 |
| H  | 1.4320768  | 9.8635112  | 26.3353980 |
| H  | 1.0924372  | 9.0417640  | 27.8674385 |
| H  | -0.0820974 | 8.9476086  | 26.5340149 |
| H  | -0.0168744 | 6.4523329  | 26.9109488 |
| H  | 1.1442462  | 6.7942379  | 28.2106649 |
| H  | 1.5299688  | 5.5693033  | 26.9947722 |
| H  | -1.8219968 | 9.0258016  | 23.2623700 |
| H  | -2.2154897 | 9.2475276  | 21.5393748 |
| H  | -0.7718046 | 10.0134948 | 22.2240453 |
| Br | 2.6322738  | 4.7204176  | 24.8324444 |
| Br | 1.0791896  | 4.8531908  | 21.7491615 |

*Fe-adduct*  $R_1=C(CH_3)_3$   $R_2=I$

46

|                           |            |            |            |
|---------------------------|------------|------------|------------|
| Energy = -4147.3712327010 |            |            |            |
| Fe                        | 1.5681575  | 10.2230154 | 23.6409884 |
| S                         | 3.2060724  | 9.1345877  | 22.5555214 |
| C                         | 4.6248832  | 9.9546539  | 23.0406273 |
| C                         | 4.5577119  | 10.9212214 | 24.0106722 |
| S                         | 3.0373986  | 11.2810325 | 24.7295186 |
| S                         | 1.3451809  | 11.4837464 | 21.9553822 |
| C                         | 0.2237783  | 12.7023112 | 22.4151042 |
| C                         | -0.4287549 | 12.6001123 | 23.6198308 |
| C                         | 0.8655013  | 8.2881565  | 23.9396381 |
| N                         | 1.4461006  | 7.4176820  | 24.8463107 |
| C                         | 1.5848136  | 6.1579203  | 24.2527763 |

|   |            |            |            |
|---|------------|------------|------------|
| C | 0.9651604  | 6.2092686  | 23.0320619 |
| N | 0.4428770  | 7.4989759  | 22.8797332 |
| S | -0.1038871 | 11.2878443 | 24.6620463 |
| H | 0.0623886  | 13.5292571 | 21.7203775 |
| H | -1.1746927 | 13.3343715 | 23.9341405 |
| H | 5.5680405  | 9.6757018  | 22.5644986 |
| H | 5.4279878  | 11.4829882 | 24.3559939 |
| C | 1.6773498  | 7.6963800  | 26.3284337 |
| C | -0.6514203 | 7.8604212  | 21.8718396 |
| C | -1.7031569 | 6.7311123  | 21.8795686 |
| C | -0.0337255 | 8.0633796  | 20.4816228 |
| C | -1.3978083 | 9.1261010  | 22.3014361 |
| C | 0.9595033  | 8.9795457  | 26.7552017 |
| C | 3.1824845  | 7.8205107  | 26.6072936 |
| C | 1.0280125  | 6.5580109  | 27.1424021 |
| H | -1.3328250 | 5.7761203  | 21.4963232 |
| H | -2.5383407 | 7.0422153  | 21.2377810 |
| H | -2.0953731 | 6.5760997  | 22.8944934 |
| H | 0.4951431  | 7.1690834  | 20.1298546 |
| H | 0.6688675  | 8.9066228  | 20.4933974 |
| H | -0.8320223 | 8.2907471  | 19.7613210 |
| H | 3.6069839  | 8.6614971  | 26.0433174 |
| H | 3.7280158  | 6.9062518  | 26.3424238 |
| H | 3.3364057  | 8.0097763  | 27.6791392 |
| H | 1.4131022  | 9.8745486  | 26.3244126 |
| H | 1.0383370  | 9.0549399  | 27.8486634 |
| H | -0.1050264 | 8.9582994  | 26.4889498 |
| H | -0.0384271 | 6.4654975  | 26.8935530 |
| H | 1.1058144  | 6.8156526  | 28.2072216 |
| H | 1.5073331  | 5.5841569  | 27.0043945 |
| H | -1.7999972 | 9.0338448  | 23.3179822 |
| H | -2.2388601 | 9.2589462  | 21.6067105 |
| H | -0.7783215 | 10.0236980 | 22.2550164 |
| I | 2.7882198  | 4.5611955  | 24.8638726 |
| I | 1.1344441  | 4.7072084  | 21.5875020 |

*Fe-adduct*  $R_1=C(CH_3)_3$   $R_2=SH$

48

|          |                  |            |            |
|----------|------------------|------------|------------|
| Energy = | -4349.3817163140 |            |            |
| Fe       | 1.5381094        | 10.1956377 | 23.6628423 |
| S        | 3.1516690        | 9.0343468  | 22.6225481 |
| C        | 4.5908831        | 9.8242116  | 23.1030682 |
| C        | 4.5424460        | 10.8150880 | 24.0486508 |
| S        | 3.0264134        | 11.2357696 | 24.7456460 |
| S        | 1.3774587        | 11.4517409 | 21.9696975 |
| C        | 0.2784001        | 12.6999930 | 22.4036091 |
| C        | -0.3965270       | 12.6209458 | 23.5978333 |
| C        | 0.7451283        | 8.3006882  | 23.9665820 |
| N        | 1.2527517        | 7.4045865  | 24.9046950 |
| C        | 1.2935747        | 6.1262154  | 24.3602784 |
| C        | 0.6705715        | 6.1794398  | 23.1336986 |
| N        | 0.2682112        | 7.5202357  | 22.9390689 |

|   |            |            |            |
|---|------------|------------|------------|
| S | -0.1199678 | 11.3082483 | 24.6539139 |
| H | 0.1471215  | 13.5256401 | 21.7011056 |
| H | -1.1304400 | 13.3745051 | 23.8941390 |
| H | 5.5303648  | 9.5045026  | 22.6457189 |
| H | 5.4257245  | 11.3585851 | 24.3903051 |
| C | 1.6107808  | 7.7059858  | 26.3521404 |
| C | -0.7349261 | 7.9276506  | 21.8630709 |
| C | -1.8383337 | 6.8482826  | 21.7855824 |
| C | -0.0158132 | 8.0801664  | 20.5153693 |
| C | -1.4489398 | 9.2276420  | 22.2425886 |
| C | 0.9417729  | 9.0046445  | 26.8105123 |
| C | 3.1377099  | 7.7921025  | 26.4910847 |
| C | 1.0319825  | 6.5938854  | 27.2515238 |
| H | -1.4973391 | 5.9165316  | 21.3264335 |
| H | -2.6554863 | 7.2428762  | 21.1674481 |
| H | -2.2459405 | 6.6326350  | 22.7834678 |
| H | 0.4738642  | 7.1455241  | 20.2127556 |
| H | 0.7380494  | 8.8762578  | 20.5660511 |
| H | -0.7477990 | 8.3476292  | 19.7404771 |
| H | 3.5360932  | 8.6137817  | 25.8824348 |
| H | 3.6230548  | 6.8572358  | 26.1797122 |
| H | 3.3980637  | 7.9805482  | 27.5422965 |
| H | 1.3385450  | 9.8823407  | 26.2968975 |
| H | 1.1398733  | 9.1251805  | 27.8846462 |
| H | -0.1459961 | 8.9692048  | 26.6628020 |
| H | -0.0409730 | 6.4505633  | 27.0615967 |
| H | 1.1525402  | 6.9097879  | 28.2962511 |
| H | 1.5363612  | 5.6266201  | 27.1507726 |
| H | -1.9297324 | 9.1497851  | 23.2260223 |
| H | -2.2278777 | 9.4068007  | 21.4886714 |
| H | -0.7847680 | 10.0934625 | 22.2496730 |
| S | 2.1233851  | 4.7221809  | 25.0162544 |
| S | 0.7583775  | 4.9029039  | 21.9358389 |
| H | 2.0566946  | 4.1012328  | 23.7987987 |
| H | -0.2870763 | 4.1345671  | 22.3475751 |

*Fe-adduct*  $R_1=C(CH_3)_3$   $R_2=NH_2$

50

|          |                  |            |            |
|----------|------------------|------------|------------|
| Energy = | -3663.6454851980 |            |            |
| Fe       | 1.5087403        | 10.1151988 | 23.6554837 |
| S        | 3.0760336        | 8.9127777  | 22.5884193 |
| C        | 4.5464437        | 9.6667838  | 23.0367833 |
| C        | 4.5395281        | 10.6701403 | 23.9691602 |
| S        | 3.0437273        | 11.1392767 | 24.6831377 |
| S        | 1.2661705        | 11.3417072 | 21.9515579 |
| C        | 0.1658040        | 12.5856138 | 22.3998726 |
| C        | -0.4560584       | 12.5229985 | 23.6226578 |
| C        | 0.6971433        | 8.2404466  | 24.0413523 |
| N        | 1.2406511        | 7.3707306  | 24.9833683 |
| C        | 1.2793251        | 6.0820488  | 24.4578786 |
| C        | 0.6195822        | 6.0941153  | 23.2633603 |
| N        | 0.1924064        | 7.4297367  | 23.0505457 |

|   |            |            |            |
|---|------------|------------|------------|
| S | -0.1139232 | 11.2357108 | 24.6920571 |
| H | -0.0050066 | 13.3940005 | 21.6858398 |
| H | -1.1876605 | 13.2718956 | 23.9361672 |
| H | 5.4695525  | 9.3166946  | 22.5680208 |
| H | 5.4410951  | 11.1970446 | 24.2881827 |
| C | 1.6092627  | 7.6807776  | 26.4213896 |
| C | -0.7814948 | 7.8111882  | 21.9530887 |
| C | -1.8564064 | 6.7055305  | 21.8172611 |
| C | -0.0311773 | 7.9880347  | 20.6242432 |
| C | -1.5426389 | 9.0900186  | 22.3195311 |
| C | 1.0090269  | 9.0170059  | 26.8675467 |
| C | 3.1393190  | 7.7143690  | 26.5665997 |
| C | 0.9787796  | 6.6093295  | 27.3394344 |
| H | -1.5055528 | 5.8214834  | 21.2752505 |
| H | -2.6993916 | 7.1189545  | 21.2484293 |
| H | -2.2370718 | 6.3998689  | 22.8020866 |
| H | 0.5039986  | 7.0718572  | 20.3354945 |
| H | 0.6976546  | 8.8047799  | 20.6918533 |
| H | -0.7462006 | 8.2254928  | 19.8239920 |
| H | 3.5743892  | 8.4741713  | 25.9041359 |
| H | 3.6051593  | 6.7457548  | 26.3333898 |
| H | 3.4050360  | 7.9637051  | 27.6035074 |
| H | 1.4749912  | 9.8725178  | 26.3745889 |
| H | 1.1759660  | 9.1153661  | 27.9495981 |
| H | -0.0725816 | 9.0489079  | 26.6828785 |
| H | -0.1143903 | 6.6050097  | 27.2226006 |
| H | 1.2051383  | 6.8802871  | 28.3795789 |
| H | 1.3460979  | 5.5964581  | 27.1541481 |
| H | -2.0807661 | 8.9711497  | 23.2693009 |
| H | -2.2762630 | 9.2844355  | 21.5247320 |
| H | -0.8939794 | 9.9637281  | 22.3982172 |
| N | 1.8603398  | 4.9580430  | 25.0451642 |
| N | 0.5403474  | 4.9719570  | 22.4232825 |
| H | 1.8289315  | 4.1965777  | 24.3614996 |
| H | 2.8238127  | 5.1114324  | 25.3455062 |
| H | 0.8522611  | 5.1418029  | 21.4670834 |
| H | -0.3633121 | 4.5000337  | 22.4073211 |

*Fe-adduct*  $R_1=C(CH_3)_3$   $R_2=NO_2$

50

|                           |            |            |            |
|---------------------------|------------|------------|------------|
| Energy = -3962.0941018150 |            |            |            |
| Fe                        | 1.5478716  | 10.0869015 | 23.6397157 |
| S                         | 3.2124446  | 8.9426669  | 22.6729528 |
| C                         | 4.6216852  | 9.7763571  | 23.1590654 |
| C                         | 4.5294434  | 10.8003877 | 24.0660696 |
| S                         | 2.9938642  | 11.2070137 | 24.7169420 |
| S                         | 1.3813856  | 11.3047475 | 21.9140098 |
| C                         | 0.2863612  | 12.5643078 | 22.3129523 |
| C                         | -0.3865698 | 12.5201184 | 23.5098883 |
| C                         | 0.7909865  | 8.2317324  | 23.9876429 |
| N                         | 1.2755739  | 7.3706730  | 24.9589757 |
| C                         | 1.0486336  | 6.0536202  | 24.5651547 |

|   |            |            |            |
|---|------------|------------|------------|
| C | 0.3054241  | 6.0963776  | 23.4192471 |
| N | 0.1141016  | 7.4110746  | 23.0625266 |
| S | -0.1124061 | 11.2356617 | 24.5990788 |
| H | 0.1614214  | 13.3738730 | 21.5910515 |
| H | -1.1118142 | 13.2870782 | 23.7921471 |
| H | 5.5768764  | 9.4579260  | 22.7349024 |
| H | 5.3920163  | 11.3769933 | 24.4057744 |
| C | 1.6450624  | 7.7355860  | 26.4166129 |
| C | -0.7240437 | 7.8532166  | 21.8443022 |
| C | -1.7991631 | 6.7992225  | 21.5137620 |
| C | 0.2150762  | 8.0229412  | 20.6430011 |
| C | -1.4831709 | 9.1380572  | 22.1850648 |
| C | 0.8629890  | 8.9836858  | 26.8386258 |
| C | 3.1555134  | 7.9626136  | 26.5398753 |
| C | 1.1767182  | 6.5983368  | 27.3481714 |
| H | -1.4098574 | 5.9159494  | 20.9984367 |
| H | -2.5015584 | 7.2757525  | 20.8187515 |
| H | -2.3703219 | 6.4923784  | 22.3992615 |
| H | 0.7244841  | 7.0785731  | 20.4087425 |
| H | 0.9693450  | 8.7956837  | 20.8224042 |
| H | -0.3789370 | 8.3191218  | 19.7669711 |
| H | 3.4799017  | 8.7994567  | 25.9103358 |
| H | 3.7139865  | 7.0636943  | 26.2608191 |
| H | 3.3889109  | 8.2123749  | 27.5847304 |
| H | 1.1791000  | 9.8769759  | 26.2977168 |
| H | 1.0582942  | 9.1546511  | 27.9058412 |
| H | -0.2190335 | 8.8487824  | 26.7054069 |
| H | 0.1223203  | 6.3415076  | 27.1733697 |
| H | 1.2571936  | 6.9690088  | 28.3782471 |
| H | 1.7925111  | 5.6976584  | 27.2856759 |
| H | -2.1546448 | 8.9834257  | 23.0408540 |
| H | -2.0946558 | 9.4028131  | 21.3122674 |
| H | -0.8299319 | 9.9817047  | 22.4037251 |
| N | 1.7748456  | 4.8724163  | 24.9764541 |
| N | -0.0509578 | 4.9062877  | 22.6209845 |
| O | 1.2220130  | 3.7848743  | 24.7693491 |
| O | 2.9078673  | 5.0200727  | 25.4491944 |
| O | -1.0437060 | 4.2790305  | 22.9660014 |
| O | 0.6949701  | 4.6522256  | 21.6755566 |

*Fe-adduct*  $R_1=C(CH_3)_3$   $R_2=COCH_3$

56

|          |                  |            |            |
|----------|------------------|------------|------------|
| Energy = | -3858.2928049030 |            |            |
| Fe       | 1.5553333        | 10.0771393 | 23.5676589 |
| S        | 3.0149868        | 8.8001204  | 22.4453240 |
| C        | 4.5280864        | 9.5372085  | 22.7519485 |
| C        | 4.6095010        | 10.5789652 | 23.6383299 |
| S        | 3.1847661        | 11.1051126 | 24.4457586 |
| S        | 1.2259563        | 11.2868699 | 21.8659476 |
| C        | 0.2250289        | 12.5901849 | 22.3658269 |
| C        | -0.3050985       | 12.5782733 | 23.6324376 |
| C        | 0.7308599        | 8.2571735  | 24.0332742 |



|   |            |            |            |
|---|------------|------------|------------|
| N | 1.1008717  | 7.4077474  | 25.0652527 |
| C | 0.7168877  | 6.0952056  | 24.7761081 |
| C | 0.0590663  | 6.1211340  | 23.5739307 |
| N | 0.0318325  | 7.4540341  | 23.1419308 |
| S | 0.0575260  | 11.2945814 | 24.6980362 |
| H | 0.0405493  | 13.3932423 | 21.6493896 |
| H | -0.9732062 | 13.3670569 | 23.9867479 |
| H | 5.4066442  | 9.1390772  | 22.2386878 |
| H | 5.5429985  | 11.0963690 | 23.8686674 |
| C | 1.7582732  | 7.7844620  | 26.3921605 |
| C | -0.9374766 | 7.9224401  | 22.0465816 |
| C | -1.9935450 | 6.8293100  | 21.8034633 |
| C | -0.2007862 | 8.2046760  | 20.7298686 |
| C | -1.7034956 | 9.1606732  | 22.5332732 |
| C | 1.2601536  | 9.1542395  | 26.8648593 |
| C | 3.2842278  | 7.7585170  | 26.2229485 |
| C | 1.3270499  | 6.7897171  | 27.4871731 |
| H | -1.5938732 | 5.9394512  | 21.3028733 |
| H | -2.7515762 | 7.2482564  | 21.1285497 |
| H | -2.4967549 | 6.5235051  | 22.7302123 |
| H | 0.2039576  | 7.2859900  | 20.2867478 |
| H | 0.6163783  | 8.9187040  | 20.8651571 |
| H | -0.9115850 | 8.6344512  | 20.0098486 |
| H | 3.6106966  | 8.4861117  | 25.4711756 |
| H | 3.6247978  | 6.7600979  | 25.9209347 |
| H | 3.7577554  | 8.0188333  | 27.1806640 |
| H | 1.5989804  | 9.9651220  | 26.2196069 |
| H | 1.6659869  | 9.3375633  | 27.8692620 |
| H | 0.1636454  | 9.1815017  | 26.9263190 |
| H | 0.2335365  | 6.6913306  | 27.5343659 |
| H | 1.6623750  | 7.1962606  | 28.4500347 |
| H | 1.7859805  | 5.8004378  | 27.3949812 |
| H | -2.1973368 | 8.9635773  | 23.4948006 |
| H | -2.4758424 | 9.3999123  | 21.7896407 |
| H | -1.0595785 | 10.0352138 | 22.6475256 |
| C | 1.2709385  | 4.8254096  | 25.4059943 |
| C | -0.1546629 | 4.8720400  | 22.7619697 |
| C | 0.3015006  | 3.8705928  | 26.0474444 |
| H | -0.3858331 | 3.4893156  | 25.2770449 |
| H | -0.3227445 | 4.3925312  | 26.7866413 |
| H | 0.8473148  | 3.0442027  | 26.5165231 |
| C | 0.6980239  | 4.7020650  | 21.5203928 |
| H | 1.5942052  | 4.1413292  | 21.8345168 |
| H | 1.0441942  | 5.6482034  | 21.0921478 |
| H | 0.1685809  | 4.0954436  | 20.7752346 |
| O | -0.8537531 | 3.9572196  | 23.1769708 |
| O | 2.4685004  | 4.5986169  | 25.3135943 |

*Fe-adduct*  $R_1=C(CH_3)_3$   $R_2=C_6H_5$

66

Energy = -4015.1559027820

|    |            |            |            |
|----|------------|------------|------------|
| Fe | 1.5858673  | 9.9078107  | 23.5116726 |
| S  | 2.9800309  | 8.3853189  | 22.6388162 |
| C  | 4.5322010  | 9.0643474  | 22.8915279 |
| C  | 4.6620282  | 10.2097703 | 23.6310391 |
| S  | 3.2560907  | 10.9372002 | 24.3101290 |
| S  | 1.4317851  | 10.8691455 | 21.6399702 |
| C  | 0.5347872  | 12.3107732 | 21.9035120 |
| C  | -0.0382532 | 12.5311087 | 23.1323503 |
| C  | 0.5859230  | 8.2048749  | 24.1570608 |
| N  | 0.9733157  | 7.4209857  | 25.2284339 |
| C  | 0.6620665  | 6.0729426  | 24.9775107 |
| C  | 1.1513127  | 4.8697648  | 25.6961366 |
| C  | -0.0065182 | 6.0297979  | 23.7834780 |
| C  | -0.2754402 | 4.7835527  | 23.0237977 |
| N  | -0.1115193 | 7.3532622  | 23.3172295 |
| S  | 0.1612593  | 11.3898315 | 24.3862494 |
| H  | 0.4453009  | 13.0116720 | 21.0706363 |
| H  | -0.6430211 | 13.4187214 | 23.3347244 |
| H  | 5.3953737  | 8.5499857  | 22.4617235 |
| H  | 5.6230134  | 10.6927754 | 23.8199808 |
| C  | 1.5428034  | 7.9226064  | 26.5516548 |
| C  | -1.0571940 | 7.7599936  | 22.1842333 |
| C  | -2.2570303 | 6.7909716  | 22.1351916 |
| C  | -0.3261218 | 7.7322938  | 20.8342481 |
| C  | -1.6552651 | 9.1435504  | 22.4637367 |
| C  | 1.0211424  | 9.3348492  | 26.8412430 |
| C  | 3.0774870  | 7.9047103  | 26.5059446 |
| C  | 1.0450041  | 7.0386740  | 27.7124875 |
| C  | -1.2618447 | 3.8674127  | 23.4244200 |
| C  | 2.4901496  | 4.4669951  | 25.5536978 |
| C  | 0.5499290  | 4.4480349  | 21.9366867 |
| C  | 0.3705867  | 3.2455628  | 21.2499800 |
| C  | -0.6272249 | 2.3513075  | 21.6466582 |
| C  | -1.4377529 | 2.6631247  | 22.7413778 |
| H  | -2.2130565 | 1.9666307  | 23.0643935 |
| H  | -1.9077416 | 4.1131264  | 24.2676180 |
| H  | 1.0220987  | 3.0019752  | 20.4094587 |
| H  | -0.7668226 | 1.4117685  | 21.1102308 |
| H  | 1.3517850  | 5.1282019  | 21.6457500 |
| C  | 0.2807392  | 4.0558269  | 26.4387553 |
| C  | 0.7404038  | 2.8866992  | 27.0462921 |
| C  | 2.0787057  | 2.5063044  | 26.9147171 |
| C  | 2.9505332  | 3.2971650  | 26.1619916 |
| H  | 2.4387065  | 1.5933342  | 27.3909541 |
| H  | 0.0508579  | 2.2713233  | 27.6261062 |
| H  | -0.7607630 | 4.3566944  | 26.5562892 |

|   |            |            |            |
|---|------------|------------|------------|
| H | 3.1662596  | 5.0693591  | 24.9450640 |
| H | 3.9925515  | 2.9984986  | 26.0385653 |
| H | -2.0073899 | 5.8089852  | 21.7245466 |
| H | -3.0173723 | 7.2385454  | 21.4813409 |
| H | -2.7067599 | 6.6576365  | 23.1292888 |
| H | 0.0263236  | 6.7213058  | 20.5948669 |
| H | 0.5283333  | 8.4184289  | 20.8259466 |
| H | -1.0223100 | 8.0443865  | 20.0424054 |
| H | 3.4599266  | 8.5209376  | 25.6844854 |
| H | 3.4574548  | 6.8813862  | 26.3897281 |
| H | 3.4712977  | 8.3066428  | 27.4505082 |
| H | 1.4199560  | 10.0778852 | 26.1488050 |
| H | 1.3407875  | 9.6185141  | 27.8531900 |
| H | -0.0760163 | 9.3687088  | 26.8024003 |
| H | -0.0457373 | 6.9091673  | 27.6808571 |
| H | 1.2928513  | 7.5561794  | 28.6489574 |
| H | 1.5187537  | 6.0547202  | 27.7463332 |
| H | -2.1825424 | 9.1567551  | 23.4271187 |
| H | -2.3802604 | 9.3639118  | 21.6683714 |
| H | -0.9105754 | 9.9409465  | 22.4715836 |

*Fe-adduct*  $R_1=C_6H_5$   $R_2=CH_3$

48

|                           |            |            |            |
|---------------------------|------------|------------|------------|
| Energy = -3779.2414128790 |            |            |            |
| Fe                        | 1.8583502  | 10.1235101 | 23.4490180 |
| S                         | 3.5505316  | 9.2065483  | 22.3195063 |
| C                         | 4.9492896  | 9.7617767  | 23.1292662 |
| C                         | 4.8220037  | 10.5639929 | 24.2334742 |
| S                         | 3.2470837  | 10.9505197 | 24.8073639 |
| S                         | 1.2518633  | 11.2338907 | 21.7495405 |
| C                         | -0.0955299 | 12.1934256 | 22.2259767 |
| C                         | -0.6178424 | 12.0364487 | 23.4821714 |
| C                         | 1.2276107  | 8.3209632  | 23.7538888 |
| N                         | 1.5242648  | 7.4917364  | 24.8050976 |
| C                         | 0.9971265  | 6.2002316  | 24.6118849 |
| C                         | 1.1628213  | 5.1045198  | 25.6060968 |
| C                         | 0.3482366  | 6.2242918  | 23.4126577 |
| C                         | -0.4168207 | 5.1640053  | 22.7004401 |
| N                         | 0.4949204  | 7.5298929  | 22.9066217 |
| S                         | 0.1081818  | 10.9300686 | 24.5679315 |
| H                         | -0.4847342 | 12.9163636 | 21.5057665 |
| H                         | -1.4903800 | 12.5980385 | 23.8264365 |
| H                         | 5.9238785  | 9.4633515  | 22.7342704 |
| H                         | 5.6773470  | 10.9882055 | 24.7633966 |
| C                         | 2.1773389  | 7.8823484  | 26.0251013 |
| C                         | -0.1521794 | 7.9644837  | 21.6983904 |
| C                         | 0.3643870  | 7.5968086  | 20.4537033 |
| C                         | -1.3321307 | 8.7075013  | 21.7903350 |
| C                         | 1.4479886  | 8.5838740  | 26.9891011 |

|   |            |           |            |
|---|------------|-----------|------------|
| C | 3.5040745  | 7.5151007 | 26.2598621 |
| H | 0.5839174  | 4.2260042 | 25.2966581 |
| H | 0.8148416  | 5.4083499 | 26.6046145 |
| H | 2.2144543  | 4.7971266 | 25.7095326 |
| H | -1.4442411 | 5.4872904 | 22.4766504 |
| H | -0.4718811 | 4.2614031 | 23.3208907 |
| H | 0.0513089  | 4.8877336 | 21.7437707 |
| C | 4.1038377  | 7.8545643 | 27.4748168 |
| C | 2.0567681  | 8.9240177 | 28.1978598 |
| C | 3.3824153  | 8.5563269 | 28.4437808 |
| H | 3.8564056  | 8.8232860 | 29.3891875 |
| H | 5.1428892  | 7.5784340 | 27.6585590 |
| H | 0.4181523  | 8.8736516 | 26.7782438 |
| H | 1.4935795  | 9.4821290 | 28.9465810 |
| H | 4.0635467  | 6.9905616 | 25.4849797 |
| C | -1.9996713 | 9.0839200 | 20.6240174 |
| C | -0.3096688 | 7.9778449 | 19.2912558 |
| C | -1.4918472 | 8.7178991 | 19.3746106 |
| H | 1.2983899  | 7.0368862 | 20.4011777 |
| H | -1.7042745 | 9.0010199 | 22.7719136 |
| H | -2.9157476 | 9.6715689 | 20.6937781 |
| H | -2.0135141 | 9.0161174 | 18.4642795 |
| H | 0.0966979  | 7.7016566 | 18.3176325 |

*NHC*  $R_1=CH_3$   $R_2=H$

15

|          |                 |           |            |
|----------|-----------------|-----------|------------|
| Energy = | -304.9268189014 |           |            |
| C        | 0.5606789       | 8.4809343 | 24.1015301 |
| N        | 0.7121952       | 7.5653887 | 25.1106127 |
| C        | 0.1431932       | 6.3291704 | 24.8180513 |
| C        | -0.3953561      | 6.4517134 | 23.5724036 |
| N        | -0.1304745      | 7.7550441 | 23.1647461 |
| C        | 1.3937595       | 7.8767183 | 26.3571540 |
| C        | -0.5348890      | 8.3142326 | 21.8810159 |
| H        | 1.7428360       | 8.9118642 | 26.2878612 |
| H        | 2.2541824       | 7.2094300 | 26.5097549 |
| H        | 0.7090485       | 7.7786214 | 27.2120169 |
| H        | -1.0918958      | 7.5579158 | 21.3146962 |
| H        | 0.3469688       | 8.6194776 | 21.3034135 |
| H        | -1.1748594      | 9.1919020 | 22.0359107 |
| H        | 0.1634463       | 5.4842592 | 25.4973245 |
| H        | -0.9316140      | 5.7323981 | 22.9630083 |

*NHC*  $R_1=CH_3$   $R_2=I$

15

|          |                 |           |            |
|----------|-----------------|-----------|------------|
| Energy = | -899.4365904326 |           |            |
| C        | 0.5833804       | 8.5490908 | 24.0913964 |
| N        | 0.7414232       | 7.6512248 | 25.1133438 |
| C        | 0.1679976       | 6.4191801 | 24.8214587 |
| C        | -0.3764034      | 6.5366501 | 23.5641160 |
| N        | -0.1100541      | 7.8369777 | 23.1457237 |

|   |            |           |            |
|---|------------|-----------|------------|
| C | 1.4335490  | 7.9893976 | 26.3480535 |
| C | -0.4948350 | 8.4318782 | 21.8702824 |
| H | 1.7591996  | 9.0299377 | 26.2531126 |
| H | 2.3053012  | 7.3376954 | 26.4961335 |
| H | 0.7610720  | 7.8864629 | 27.2105668 |
| H | -1.0432630 | 7.6945483 | 21.2735893 |
| H | 0.4019667  | 8.7488473 | 21.3245086 |
| H | -1.1337080 | 9.3050559 | 22.0484192 |
| I | 0.1693144  | 4.7655717 | 26.0852629 |
| I | -1.3977106 | 5.0765615 | 22.4835426 |

*NHC*  $R_1=CH_3$   $R_2=F$

15

|          |                 |           |            |
|----------|-----------------|-----------|------------|
| Energy = | -503.4833337572 |           |            |
| C        | 0.5704014       | 8.5004419 | 24.1006053 |
| N        | 0.7257957       | 7.5891944 | 25.1188510 |
| C        | 0.1532091       | 6.3686225 | 24.8147848 |
| C        | -0.3851114      | 6.4909558 | 23.5721501 |
| N        | -0.1246195      | 7.7833484 | 23.1539105 |
| C        | 1.4064315       | 7.8954228 | 26.3679430 |
| C        | -0.5323315      | 8.3363629 | 21.8670743 |
| H        | 1.7473602       | 8.9326235 | 26.2897430 |
| H        | 2.2687474       | 7.2316420 | 26.5176992 |
| H        | 0.7219555       | 7.7941615 | 27.2213162 |
| H        | -1.0840008      | 7.5739275 | 21.3057908 |
| H        | 0.3523977       | 8.6424126 | 21.2957400 |
| H        | -1.1753950      | 9.2100242 | 22.0267822 |
| F        | 0.1714919       | 5.3175881 | 25.6438728 |
| F        | -1.0490922      | 5.5923419 | 22.8332269 |

*NHC*  $R_1=CH_3$   $R_2=Cl$

15

|          |                  |           |            |
|----------|------------------|-----------|------------|
| Energy = | -1224.2529420670 |           |            |
| C        | 0.5765544        | 8.5265362 | 24.0943056 |
| N        | 0.7326438        | 7.6234751 | 25.1141339 |
| C        | 0.1597930        | 6.3928076 | 24.8205176 |
| C        | -0.3825422       | 6.5106874 | 23.5682511 |
| N        | -0.1171747       | 7.8104580 | 23.1502591 |
| C        | 1.4202056        | 7.9435040 | 26.3560418 |
| C        | -0.5125145       | 8.3854442 | 21.8689651 |
| H        | 1.7534998        | 8.9823464 | 26.2712033 |
| H        | 2.2868342        | 7.2847698 | 26.5030854 |
| H        | 0.7427066        | 7.8387107 | 27.2143346 |
| H        | -1.0598791       | 7.6362349 | 21.2869391 |
| H        | 0.3789581        | 8.7002645 | 21.3133707 |
| H        | -1.1548608       | 9.2577345 | 22.0384605 |
| Cl       | 0.1686070        | 5.0392746 | 25.8685119 |
| Cl       | -1.2255911       | 5.3268120 | 22.6611201 |

*NHC*  $R_1=CH_3$   $R_2=Br$

15

Energy = -5452.6113320360

|    |            |           |            |
|----|------------|-----------|------------|
| C  | 0.5796771  | 8.5369917 | 24.0929659 |
| N  | 0.7368343  | 7.6360884 | 25.1143864 |
| C  | 0.1635370  | 6.4068525 | 24.8200073 |
| C  | -0.3791841 | 6.5244837 | 23.5671389 |
| N  | -0.1144154 | 7.8226756 | 23.1477923 |
| C  | 1.4266310  | 7.9632006 | 26.3534423 |
| C  | -0.5051864 | 8.4054065 | 21.8686343 |
| H  | 1.7563812  | 9.0028002 | 26.2645333 |
| H  | 2.2955046  | 7.3072950 | 26.5001706 |
| H  | 0.7512064  | 7.8584360 | 27.2134259 |
| H  | -1.0514493 | 7.6601176 | 21.2806325 |
| H  | 0.3884950  | 8.7223507 | 21.3181148 |
| H  | -1.1468417 | 9.2774568 | 22.0411251 |
| Br | 0.1679561  | 4.9184474 | 25.9634589 |
| Br | -1.3019156 | 5.2164773 | 22.5836814 |

*NHC*  $R_1=CH_3$   $R_2=CH_3$

21

Energy = -383.5889228047

|   |            |           |            |
|---|------------|-----------|------------|
| C | 0.5509951  | 8.4635579 | 24.0911667 |
| N | 0.7125920  | 7.5669689 | 25.1110829 |
| C | 0.1456665  | 6.3159439 | 24.8461955 |
| C | -0.4076129 | 6.4119647 | 23.5955443 |
| N | -0.1437552 | 7.7243051 | 23.1688595 |
| C | 1.4013027  | 7.9115112 | 26.3427014 |
| C | -0.5315710 | 8.3126968 | 21.8929044 |
| C | -1.1482453 | 5.3662052 | 22.8214733 |
| C | 0.1797967  | 5.1661721 | 25.7948673 |
| H | 1.7376712  | 8.9485150 | 26.2444649 |
| H | 2.2722511  | 7.2601081 | 26.5078276 |
| H | 0.7297104  | 7.8282211 | 27.2102329 |
| H | -1.1000618 | 7.5930752 | 21.2941070 |
| H | 0.3610678  | 8.6150938 | 21.3303233 |
| H | -1.1536080 | 9.1999638 | 22.0651089 |
| H | -0.3304834 | 4.2974335 | 25.3590010 |
| H | -0.3207559 | 5.3992269 | 26.7488370 |
| H | 1.2096758  | 4.8572973 | 26.0367316 |
| H | -1.4694132 | 5.7320552 | 21.8387525 |
| H | -2.0547178 | 5.0348861 | 23.3513788 |
| H | -0.5257349 | 4.4759181 | 22.6431392 |

*NHC*  $R_1=CH_3$   $R_2=OH$

17

Energy = -455.4389092724

|   |            |           |            |
|---|------------|-----------|------------|
| C | 0.5438452  | 8.4497490 | 24.0850650 |
| N | 0.7001124  | 7.5472703 | 25.1057727 |
| C | 0.1316512  | 6.3128737 | 24.8247234 |
| C | -0.4125325 | 6.4145404 | 23.5790040 |
| N | -0.1504674 | 7.7179685 | 23.1494031 |

|   |            |           |            |
|---|------------|-----------|------------|
| C | 1.3867545  | 7.8597659 | 26.3479227 |
| C | -0.5469541 | 8.2837809 | 21.8698148 |
| H | 1.7207828  | 8.8993277 | 26.2693118 |
| H | 2.2532784  | 7.1993078 | 26.4931842 |
| H | 0.7103022  | 7.7495236 | 27.2073230 |
| H | -1.0977229 | 7.5451316 | 21.2690798 |
| H | 0.3373863  | 8.5955408 | 21.2999254 |
| H | -1.1989914 | 9.1526401 | 22.0234839 |
| O | 0.1899812  | 5.2861406 | 25.7270176 |
| O | -1.0740659 | 5.4196774 | 22.9017458 |
| H | -0.2673987 | 4.5171614 | 25.3413069 |
| H | -1.3746313 | 5.7549104 | 22.0401358 |

NHC  $R_1=CH_3$   $R_2=NO_2$

19

|          |                 |            |            |
|----------|-----------------|------------|------------|
| Energy = | -714.1583596197 |            |            |
| C        | -0.2259133      | -0.6410834 | 0.0948462  |
| N        | 0.2042911       | -1.6231853 | 0.9540264  |
| C        | -0.3788111      | -2.8441642 | 0.6774559  |
| N        | -0.1410510      | -4.0503360 | 1.4398456  |
| C        | -1.2225484      | -2.6369461 | -0.3946723 |
| N        | -2.0504321      | -3.5860269 | -1.1057196 |
| N        | -1.1060371      | -1.3015608 | -0.7279936 |
| C        | 1.1233483       | -1.3276108 | 2.0546804  |
| C        | -1.7535037      | -0.6256220 | -1.8540606 |
| H        | -2.8368281      | -0.5813842 | -1.7013751 |
| H        | -1.5468532      | -1.1547882 | -2.7926270 |
| H        | -1.3254175      | 0.3806061  | -1.8883107 |
| H        | 1.2689548       | -0.2437051 | 2.0436329  |
| H        | 2.0751908       | -1.8482598 | 1.9063556  |
| H        | 0.6898775       | -1.6386560 | 3.0130585  |
| O        | -3.1217702      | -3.1551106 | -1.5534493 |
| O        | -1.6201952      | -4.7326633 | -1.2281975 |
| O        | 1.0079024       | -4.2072319 | 1.8748477  |
| O        | -1.0945241      | -4.8082414 | 1.6152164  |

NHC  $R_1=CH_3$   $R_2=CO_2CH_3$

27

|          |                 |           |            |
|----------|-----------------|-----------|------------|
| Energy = | -760.8987712268 |           |            |
| C        | 0.5656834       | 8.3721191 | 24.0584579 |
| N        | 0.4725120       | 7.6244314 | 25.2015131 |
| C        | -0.1678311      | 6.4002069 | 24.9975616 |
| C        | -0.4929051      | 6.3677773 | 23.6563302 |
| N        | -0.0384666      | 7.5698099 | 23.1235381 |
| C        | 1.0689977       | 8.0904664 | 26.4505998 |
| C        | -0.2187729      | 8.0191619 | 21.7462759 |
| H        | 1.5730512       | 9.0335950 | 26.2184124 |
| H        | 1.7988290       | 7.3616522 | 26.8268506 |
| H        | 0.2997728       | 8.2502109 | 27.2147772 |
| H        | -1.2807343      | 7.9971313 | 21.4675203 |
| H        | 0.3460841       | 7.3855198 | 21.0525354 |
| H        | 0.1515376       | 9.0477864 | 21.7044202 |

|   |            |           |            |
|---|------------|-----------|------------|
| C | -0.3825895 | 5.3233941 | 25.9857821 |
| C | -1.2568111 | 5.3273271 | 22.9270420 |
| O | -0.5687906 | 5.8207140 | 27.2419048 |
| O | -0.7060648 | 5.0816957 | 21.7053947 |
| C | -1.3987118 | 4.0816230 | 20.9217198 |
| O | -2.2526453 | 4.7747324 | 23.3478825 |
| O | -0.3922258 | 4.1369402 | 25.7204204 |
| C | -0.7827329 | 4.8160281 | 28.2604910 |
| H | -1.7007436 | 4.2523681 | 28.0505642 |
| H | -0.8743822 | 5.3696106 | 29.2000315 |
| H | 0.0645308  | 4.1192756 | 28.2981643 |
| H | -0.8788273 | 4.0560546 | 19.9592670 |
| H | -2.4531525 | 4.3561723 | 20.7910858 |
| H | -1.3413513 | 3.1055655 | 21.4202771 |

*NHC*  $R_1=CH_3$   $R_2=OCH_3$

23

|          |                 |           |            |
|----------|-----------------|-----------|------------|
| Energy = | -534.0673166999 |           |            |
| C        | 0.5225890       | 8.7446345 | 24.2349356 |
| N        | 0.8200158       | 7.7344582 | 25.1095360 |
| C        | 0.2780439       | 6.5010120 | 24.7235787 |
| C        | -0.3793086      | 6.7400576 | 23.5420355 |
| N        | -0.2197667      | 8.0942704 | 23.2757447 |
| C        | 1.6487540       | 7.9283257 | 26.2868845 |
| C        | -0.7773161      | 8.7658904 | 22.1134885 |
| H        | 1.9905997       | 8.9683791 | 26.2642039 |
| H        | 2.5134070       | 7.2501777 | 26.2722883 |
| H        | 1.0793581       | 7.7540221 | 27.2122915 |
| H        | -1.8761270      | 8.7639882 | 22.1434774 |
| H        | -0.4508573      | 8.2756300 | 21.1860146 |
| H        | -0.4098180      | 9.7969169 | 22.1395841 |
| O        | 0.4765449       | 5.3421914 | 25.4167337 |
| O        | -1.0961323      | 5.9589364 | 22.6930160 |
| C        | -0.5384698      | 5.0536601 | 26.4045188 |
| H        | -0.2484510      | 4.1059460 | 26.8737276 |
| H        | -1.5265950      | 4.9509744 | 25.9301393 |
| H        | -0.5838319      | 5.8456258 | 27.1685069 |
| C        | -0.6048428      | 4.6163983 | 22.5160607 |
| H        | -0.7347469      | 4.0176105 | 23.4288264 |
| H        | 0.4609690       | 4.6299569 | 22.2416066 |
| H        | -1.1984881      | 4.1854975 | 21.7020906 |

*NHC*  $R_1=CH_3$   $R_2=COCH_3$

25

|          |                 |           |            |
|----------|-----------------|-----------|------------|
| Energy = | -610.3541192644 |           |            |
| C        | 0.3909058       | 8.5867863 | 24.2590214 |
| N        | 0.4446300       | 7.6377930 | 25.2417065 |
| C        | -0.1264763      | 6.4129976 | 24.8511994 |



|   |            |           |            |
|---|------------|-----------|------------|
| C | -0.5598329 | 6.6150730 | 23.5462069 |
| N | -0.2380581 | 7.9239871 | 23.2323124 |
| C | 0.9695644  | 7.9927757 | 26.5562933 |
| C | -0.4709077 | 8.5673097 | 21.9407933 |
| H | 1.2671924  | 9.0438938 | 26.4931582 |
| H | 1.8431304  | 7.3820860 | 26.8176952 |
| H | 0.2012261  | 7.8802148 | 27.3328912 |
| H | -1.5407935 | 8.5785077 | 21.7077334 |
| H | 0.0616520  | 8.0339893 | 21.1417483 |
| H | -0.0817526 | 9.5860901 | 22.0242458 |
| C | -0.3322437 | 5.1827391 | 25.6355990 |
| C | -1.2810427 | 5.7178264 | 22.5882429 |
| C | 0.4513572  | 4.9311352 | 26.9092236 |
| H | 0.2868750  | 3.8900545 | 27.2075955 |
| H | 0.1024324  | 5.5863813 | 27.7206165 |
| H | 1.5264285  | 5.1164954 | 26.7756392 |
| C | -0.6972680 | 4.3619686 | 22.2680019 |
| H | -0.0812806 | 3.9560260 | 23.0760092 |
| H | -0.0675385 | 4.4822342 | 21.3698060 |
| H | -1.5063736 | 3.6642539 | 22.0217305 |
| O | -2.2658954 | 6.1523859 | 22.0029935 |
| O | -1.1373402 | 4.3412753 | 25.2321465 |

*NHC*  $R_1=CH_3$   $R_2=NH_2$

19

|          |                 |            |            |
|----------|-----------------|------------|------------|
| Energy = | -415.6932205784 |            |            |
| C        | -0.2641408      | -0.6330108 | 0.0976632  |
| N        | 0.1632054       | -1.6351876 | 0.9457074  |
| C        | -0.3940568      | -2.8718793 | 0.6450877  |
| N        | -0.1887842      | -4.0092584 | 1.4396519  |
| C        | -1.2170510      | -2.6740855 | -0.4362995 |
| N        | -2.0019760      | -3.5573651 | -1.2011438 |
| N        | -1.1138721      | -1.3009251 | -0.7320005 |
| C        | 1.0981298       | -1.4025584 | 2.0312812  |
| C        | -1.8472866      | -0.6474953 | -1.8023756 |
| H        | -2.9308012      | -0.6793503 | -1.6171706 |
| H        | -1.6468960      | -1.1342290 | -2.7664979 |
| H        | -1.5103036      | 0.3937501  | -1.8299572 |
| H        | 1.2595156       | -0.3209698 | 2.0887425  |
| H        | 2.0648494       | -1.8976746 | 1.8464975  |
| H        | 0.6873313       | -1.7712243 | 2.9821028  |
| H        | -1.4985304      | -4.3695498 | -1.5567437 |
| H        | -2.8763951      | -3.8517158 | -0.7657759 |
| H        | -0.7562307      | -4.7937801 | 1.1176788  |
| H        | 0.7873430       | -4.3046209 | 1.4971217  |

*NHC*  $R_1=CH_3$   $R_2=SH$

17

|          |                  |           |            |
|----------|------------------|-----------|------------|
| Energy = | -1101.4402144220 |           |            |
| C        | 0.4960890        | 8.5749600 | 24.1125454 |
| N        | 0.6675110        | 7.6177567 | 25.0942805 |

|   |            |           |            |
|---|------------|-----------|------------|
| C | 0.1018114  | 6.3991800 | 24.7594935 |
| C | -0.4596628 | 6.5601293 | 23.5098037 |
| N | -0.2019099 | 7.9000465 | 23.1591719 |
| C | 1.3755143  | 7.8851157 | 26.3360149 |
| C | -0.6235605 | 8.5172168 | 21.9112271 |
| H | 1.6407300  | 8.9470744 | 26.3326064 |
| H | 2.2904117  | 7.2786149 | 26.4044128 |
| H | 0.7351205  | 7.6674248 | 27.2028619 |
| H | -1.7146554 | 8.4592755 | 21.7977935 |
| H | -0.1539597 | 8.0219957 | 21.0497747 |
| H | -0.3081185 | 9.5645488 | 21.9514583 |
| S | 0.1598460  | 4.9932960 | 25.8036345 |
| S | -1.4127028 | 5.4098562 | 22.6061088 |
| H | -0.5755870 | 4.2418455 | 24.9405671 |
| H | -0.4352773 | 4.8948133 | 21.8085149 |

*NHC*  $R_1=CH_3$   $R_2=COH$

19

|          |                 |            |            |
|----------|-----------------|------------|------------|
| Energy = | -531.6782960115 |            |            |
| C        | -0.2211604      | -0.6455890 | 0.0900806  |
| N        | 0.2048105       | -1.6374098 | 0.9369296  |
| C        | -0.3831075      | -2.8747927 | 0.6863576  |
| C        | -0.0994347      | -4.0524935 | 1.5178906  |
| C        | -1.2379365      | -2.6653436 | -0.3976283 |
| C        | -2.0992195      | -3.5675828 | -1.1737459 |
| N        | -1.1081479      | -1.3153126 | -0.7146102 |
| C        | 1.1663963       | -1.3504129 | 1.9992042  |
| C        | -1.7991578      | -0.6231907 | -1.8005381 |
| H        | -2.8870475      | -0.6459503 | -1.6524431 |
| H        | -1.5549861      | -1.0712892 | -2.7727138 |
| H        | -1.4506031      | 0.4138252  | -1.7777146 |
| H        | 1.3924490       | -0.2817825 | 1.9326333  |
| H        | 2.0896303       | -1.9287592 | 1.8602887  |
| H        | 0.7418942       | -1.5761051 | 2.9863049  |
| O        | -2.1095893      | -4.7833480 | -1.1038867 |
| O        | -0.7186874      | -5.1010439 | 1.5094630  |
| H        | -2.7724854      | -3.0327516 | -1.8893085 |
| H        | 0.7632128       | -3.9064479 | 2.2144768  |

*NHC*  $R_1=CH_3$   $R_2=C_6H_5$

35

|          |                 |            |            |
|----------|-----------------|------------|------------|
| Energy = | -767.2155173325 |            |            |
| C        | -0.2019699      | -1.0382626 | 0.1966746  |
| N        | 0.0218516       | -1.9571627 | 1.1855886  |
| C        | -0.6752855      | -3.1592243 | 0.9919329  |
| C        | -0.6459779      | -4.3031232 | 1.9154667  |
| C        | -1.3864241      | -2.9908799 | -0.1793685 |
| C        | -2.2669403      | -3.9323566 | -0.8865845 |
| N        | -1.0691225      | -1.6998935 | -0.6296379 |
| C        | 0.8431435       | -1.6347321 | 2.3450157  |

|   |            |            |            |
|---|------------|------------|------------|
| C | -1.5225596 | -1.1051495 | -1.8802442 |
| H | -2.5671864 | -0.7699828 | -1.8139270 |
| H | -1.4341936 | -1.8246991 | -2.7046280 |
| H | -0.8820620 | -0.2383353 | -2.0710105 |
| H | 1.0085365  | -0.5530810 | 2.3260856  |
| H | 1.8149268  | -2.1464467 | 2.3086980  |
| H | 0.3296571  | -1.9180748 | 3.2731345  |
| C | -1.8365076 | -5.2459940 | -1.1566640 |
| C | -1.8473377 | -4.8751131 | 2.3768465  |
| C | -3.5573429 | -3.5546799 | -1.3058067 |
| C | 0.5694903  | -4.8608433 | 2.3571132  |
| C | -4.3842626 | -4.4558934 | -1.9782539 |
| C | -3.9435385 | -5.7565156 | -2.2385956 |
| C | -2.6680649 | -6.1479666 | -1.8208362 |
| H | -0.8374177 | -5.5522887 | -0.8447476 |
| H | -2.3141507 | -7.1604712 | -2.0210333 |
| H | -4.5903214 | -6.4608814 | -2.7634046 |
| H | -5.3812133 | -4.1425203 | -2.2921873 |
| H | -3.9227527 | -2.5513938 | -1.0831298 |
| C | -1.8321007 | -5.9649268 | 3.2471295  |
| H | -2.7972651 | -4.4513796 | 2.0495584  |
| C | 0.5822108  | -5.9463756 | 3.2339887  |
| C | -0.6180715 | -6.5027700 | 3.6838562  |
| H | 1.5355089  | -6.3649483 | 3.5607712  |
| H | 1.5129757  | -4.4536062 | 1.9913312  |
| H | -0.6073377 | -7.3506842 | 4.3700810  |
| H | -2.7748347 | -6.3908839 | 3.5940871  |

NHC  $R_1=C(CH_3)_3$   $R_2=H$

33

|          |                 |            |            |
|----------|-----------------|------------|------------|
| Energy = | -540.8964395829 |            |            |
| C        | -0.1192150      | -0.8368280 | 0.1760643  |
| N        | 0.0594396       | -1.7335266 | 1.1970270  |
| C        | -0.6248016      | -2.9284590 | 0.9802857  |
| C        | -1.2670025      | -2.7889784 | -0.2107360 |
| N        | -0.9424371      | -1.5181394 | -0.6825210 |
| C        | 0.9453498       | -1.4947483 | 2.3722206  |
| C        | -1.5025039      | -0.9361282 | -1.9366224 |
| C        | -2.9947179      | -0.6327272 | -1.7086550 |
| C        | -1.3314126      | -1.9479157 | -3.0829294 |
| C        | -0.7540290      | 0.3561127  | -2.2784566 |
| C        | 1.3577259       | -0.0196093 | 2.4100067  |
| C        | 2.1949998       | -2.3838407 | 2.2308545  |
| C        | 0.1808538       | -1.8474935 | 3.6602193  |
| H        | -1.6967892      | -1.5080119 | -4.0212817 |
| H        | -1.9000612      | -2.8719172 | -2.9083832 |
| H        | -0.2726067      | -2.2112065 | -3.2147603 |
| H        | -1.1704801      | 0.7685654  | -3.2093184 |
| H        | 0.3179500       | 0.1662519  | -2.4198855 |
| H        | -0.8521131      | 1.0958627  | -1.4757755 |
| H        | 1.9073619       | 0.2619156  | 1.5046693  |
| H        | 1.9954088       | 0.1460872  | 3.2908400  |

|   |            |            |            |
|---|------------|------------|------------|
| H | 0.4795118  | 0.6349688  | 2.4757425  |
| H | 2.7317990  | -2.1417254 | 1.3032470  |
| H | 1.9271156  | -3.4499231 | 2.2052989  |
| H | 2.8753660  | -2.2238393 | 3.0789169  |
| H | -0.0906207 | -2.9115322 | 3.7020852  |
| H | -0.7386748 | -1.2520411 | 3.7429815  |
| H | 0.8108282  | -1.6326758 | 4.5345172  |
| H | -3.4347086 | -0.1861492 | -2.6116714 |
| H | -3.1171148 | 0.0737544  | -0.8761424 |
| H | -3.5576370 | -1.5471946 | -1.4714096 |
| H | -0.6095575 | -3.7715888 | 1.6610943  |
| H | -1.9111267 | -3.4865893 | -0.7325525 |

NHC  $R_1=C(CH_3)_3$   $R_2=CH_3$

39

|          |                 |            |            |
|----------|-----------------|------------|------------|
| Energy = | -619.5486177373 |            |            |
| C        | -0.1654328      | -0.9830178 | 0.1838388  |
| N        | 0.0164373       | -1.8657496 | 1.2108276  |
| C        | -0.6963686      | -3.0634843 | 1.0113481  |
| C        | -0.7477672      | -4.2492106 | 1.9236117  |
| C        | -1.3594492      | -2.9165083 | -0.1821243 |
| C        | -2.2476399      | -3.9246259 | -0.8413631 |
| N        | -1.0099655      | -1.6405204 | -0.6661728 |
| C        | 0.9449241       | -1.5489223 | 2.3434235  |
| C        | -1.5150269      | -0.9805959 | -1.9124832 |
| C        | -3.0127594      | -0.6570397 | -1.7505403 |
| C        | -1.2701439      | -1.8845403 | -3.1351541 |
| C        | -0.7559626      | 0.3366258  | -2.1305017 |
| C        | 1.3525509       | -0.0701370 | 2.2641881  |
| C        | 2.2133612       | -2.4143712 | 2.2182216  |
| C        | 0.2442450       | -1.7790360 | 3.6955948  |
| H        | -1.5339770      | -1.3361529 | -4.0503108 |
| H        | -1.8698880      | -2.8011901 | -3.1161023 |
| H        | -0.2087148      | -2.1621155 | -3.1992155 |
| H        | -1.1351411      | 0.8021939  | -3.0527903 |
| H        | 0.3222920       | 0.1630388  | -2.2327402 |
| H        | -0.8959724      | 1.0239296  | -1.2896021 |
| H        | 1.8546808       | 0.1574844  | 1.3179734  |
| H        | 2.0319319       | 0.1440401  | 3.1027640  |
| H        | 0.4777569       | 0.5884119  | 2.3347986  |
| H        | 2.7160442       | -2.2083082 | 1.2630306  |
| H        | 1.9929866       | -3.4888759 | 2.2647451  |
| H        | 2.9115932       | -2.1800652 | 3.0341902  |
| H        | 0.0625951       | -2.8389109 | 3.9086861  |
| H        | -0.7166651      | -1.2466974 | 3.7258797  |
| H        | 0.8764061       | -1.3849906 | 4.5036185  |
| H        | -3.3815080      | -0.1380948 | -2.6468395 |
| H        | -3.1646100      | 0.0010155  | -0.8842286 |
| H        | -3.6255609      | -1.5566640 | -1.6104413 |
| H        | -1.1885719      | -5.1048606 | 1.3961746  |
| H        | -1.3593106      | -4.0672683 | 2.8212539  |
| H        | 0.2475077       | -4.5655929 | 2.2647080  |

|   |            |            |            |
|---|------------|------------|------------|
| H | -3.1862229 | -3.4888062 | -1.2082698 |
| H | -2.5219915 | -4.7049583 | -0.1204554 |
| H | -1.7624427 | -4.4234289 | -1.6947516 |

NHC  $R_1=C(CH_3)_3$   $R_2=NO_2$

37

|          |                 |            |            |
|----------|-----------------|------------|------------|
| Energy = | -950.1159616906 |            |            |
| C        | -0.1472030      | -1.0362454 | 0.2062839  |
| N        | 0.1170890       | -1.9200882 | 1.2075651  |
| C        | -0.5516372      | -3.1293381 | 0.9795019  |
| C        | -1.2534913      | -2.9648569 | -0.1933620 |
| N        | -0.9801947      | -1.6997621 | -0.6646268 |
| C        | 0.9509650       | -1.4986333 | 2.4086863  |
| C        | -1.4911121      | -1.0368267 | -1.9292318 |
| C        | -2.9058867      | -0.5041350 | -1.6507190 |
| C        | -1.4838446      | -2.0390748 | -3.0941995 |
| C        | -0.5511862      | 0.1268648  | -2.2684914 |
| C        | 1.0990369       | 0.0291248  | 2.3721203  |
| C        | 2.3434832       | -2.1396542 | 2.3003763  |
| C        | 0.2235942       | -1.8902261 | 3.7043984  |
| H        | -1.6777920      | -1.4870727 | -4.0232582 |
| H        | -2.2640211      | -2.8042778 | -3.0114584 |
| H        | -0.5058783      | -2.5292336 | -3.1933741 |
| H        | -0.9219138      | 0.6004053  | -3.1884385 |
| H        | 0.4753634       | -0.2222642 | -2.4427301 |
| H        | -0.5228892      | 0.8717432  | -1.4663728 |
| H        | 1.6116691       | 0.3679148  | 1.4656389  |
| H        | 1.6907381       | 0.3238151  | 3.2505796  |
| H        | 0.1254646       | 0.5333244  | 2.4173583  |
| H        | 2.8367819       | -1.8158672 | 1.3730252  |
| H        | 2.2916730       | -3.2323966 | 2.3169602  |
| H        | 2.9592625       | -1.8054217 | 3.1473002  |
| H        | 0.1656220       | -2.9733716 | 3.8517554  |
| H        | -0.7898761      | -1.4651274 | 3.7253400  |
| H        | 0.7783706       | -1.4724856 | 4.5554544  |
| H        | -3.2900223      | -0.0029844 | -2.5500683 |
| H        | -2.8813762      | 0.2285150  | -0.8322681 |
| H        | -3.5951074      | -1.3141641 | -1.3825944 |
| N        | -0.5241222      | -4.3646161 | 1.7286613  |
| N        | -2.1179097      | -3.9574051 | -0.8346226 |
| O        | 0.5062580       | -4.6577807 | 2.3487413  |
| O        | -1.5468792      | -5.0579120 | 1.6815024  |
| O        | -1.5698094      | -4.9553128 | -1.2987421 |
| O        | -3.3215288      | -3.6943328 | -0.8820214 |

NHC  $R_1=C(CH_3)_3$   $R_2=C_6H_5$

53

|          |                  |            |           |
|----------|------------------|------------|-----------|
| Energy = | -1003.1676819870 |            |           |
| C        | -0.1949690       | -1.0083829 | 0.1946737 |
| N        | -0.0175545       | -1.8815277 | 1.2271878 |

|   |            |            |            |
|---|------------|------------|------------|
| C | -0.6940727 | -3.1005778 | 1.0016276  |
| C | -0.7279472 | -4.3155321 | 1.8528737  |
| C | -1.3374524 | -2.9613519 | -0.2050558 |
| C | -2.2102171 | -3.9866370 | -0.8283007 |
| N | -0.9971876 | -1.6766774 | -0.6833147 |
| C | 0.8280235  | -1.5115074 | 2.4141611  |
| C | -1.4358165 | -1.0307156 | -1.9678234 |
| C | -2.8909028 | -0.5506073 | -1.8217090 |
| C | -1.3004813 | -2.0143300 | -3.1420658 |
| C | -0.5368860 | 0.1828908  | -2.2473677 |
| C | 1.0799253  | 0.0036403  | 2.3932193  |
| C | 2.1788926  | -2.2437821 | 2.3263155  |
| C | 0.1019333  | -1.8652937 | 3.7223504  |
| C | -1.6470745 | -5.1241841 | -1.4332135 |
| C | -1.8627496 | -4.6107808 | 2.6285569  |
| C | -3.6115523 | -3.8981077 | -0.7537435 |
| C | 0.3306967  | -5.2403731 | 1.8451886  |
| C | -4.4228913 | -4.9003680 | -1.2897834 |
| C | -3.8485549 | -6.0187939 | -1.8993660 |
| C | -2.4570622 | -6.1301412 | -1.9633202 |
| H | -0.5609686 | -5.2136119 | -1.4846370 |
| H | -1.9992652 | -7.0062422 | -2.4254980 |
| H | -4.4823915 | -6.8043129 | -2.3133883 |
| H | -5.5082731 | -4.8128366 | -1.2185595 |
| H | -4.0669612 | -3.0437571 | -0.2508813 |
| C | -1.9288765 | -5.7807781 | 3.3869788  |
| H | -2.6974369 | -3.9083317 | 2.6338920  |
| C | 0.2690376  | -6.4079756 | 2.6089289  |
| C | -0.8596578 | -6.6805931 | 3.3858405  |
| H | 1.1017774  | -7.1128200 | 2.5871938  |
| H | 1.2021042  | -5.0483782 | 1.2176353  |
| H | -0.9095009 | -7.5941414 | 3.9801853  |
| H | -2.8199959 | -5.9908878 | 3.9806609  |
| H | -1.5144341 | -1.4804795 | -4.0786661 |
| H | -1.9967996 | -2.8571345 | -3.0703480 |
| H | -0.2768069 | -2.4099909 | -3.2029892 |
| H | -0.8562390 | 0.6331792  | -3.1992752 |
| H | 0.5169274  | -0.1135039 | -2.3306749 |
| H | -0.6057107 | 0.9289315  | -1.4486297 |
| H | 1.6124590  | 0.3121358  | 1.4874940  |
| H | 1.6802482  | 0.2620215  | 3.2784316  |
| H | 0.1370754  | 0.5639605  | 2.4267065  |
| H | 2.6758516  | -2.0108069 | 1.3740863  |
| H | 2.0592761  | -3.3310010 | 2.4074370  |
| H | 2.8339198  | -1.9150179 | 3.1459016  |
| H | -0.0290146 | -2.9451251 | 3.8541242  |
| H | -0.8864763 | -1.3858606 | 3.7594547  |
| H | 0.6928542  | -1.4917666 | 4.5706157  |
| H | -3.1969936 | -0.0037688 | -2.7252499 |
| H | -2.9820961 | 0.1264144  | -0.9610038 |
| H | -3.5835418 | -1.3909199 | -1.6868670 |

NHC  $R_1=C(CH_3)_3$   $R_2=COH$

37

|          |                 |            |            |
|----------|-----------------|------------|------------|
| Energy = | -767.6365194523 |            |            |
| C        | -0.1897135      | -1.0275188 | 0.2002636  |
| N        | 0.0668066       | -1.9300929 | 1.1951970  |
| C        | -0.5907089      | -3.1480125 | 0.9836298  |
| C        | -1.2951957      | -2.9999151 | -0.2005149 |
| N        | -1.0247784      | -1.6987658 | -0.6477966 |
| C        | 1.0026268       | -1.6074430 | 2.3287394  |
| C        | -1.5957145      | -1.0393858 | -1.8742787 |
| C        | -3.1306114      | -1.1378493 | -1.8465575 |
| C        | -1.0037201      | -1.7119067 | -3.1264486 |
| C        | -1.1981919      | 0.4428847  | -1.8756153 |
| C        | 1.6832272       | -0.2610612 | 2.0492547  |
| C        | 2.0876561       | -2.6936617 | 2.4294785  |
| C        | 0.1894161       | -1.4933890 | 3.6304378  |
| H        | -1.3722849      | -1.2016823 | -4.0271400 |
| H        | -1.2779590      | -2.7717073 | -3.2083703 |
| H        | 0.0923584       | -1.6394623 | -3.1136583 |
| H        | -1.6228527      | 0.9079506  | -2.7772418 |
| H        | -0.1096047      | 0.5679036  | -1.8827449 |
| H        | -1.5836286      | 0.9623272  | -0.9897715 |
| H        | 2.2677533       | -0.2925909 | 1.1214648  |
| H        | 2.3580930       | -0.0415569 | 2.8894461  |
| H        | 0.9518586       | 0.5489396  | 1.9520751  |
| H        | 2.6156531       | -2.8020559 | 1.4720187  |
| H        | 1.6885535       | -3.6751480 | 2.7162020  |
| H        | 2.8207471       | -2.4023470 | 3.1936485  |
| H        | -0.3207180      | -2.4295106 | 3.8936550  |
| H        | -0.5683234      | -0.7029510 | 3.5374161  |
| H        | 0.8583149       | -1.2325921 | 4.4620218  |
| H        | -3.5430647      | -0.6087089 | -2.7165533 |
| H        | -3.5317690      | -0.6687985 | -0.9375533 |
| H        | -3.4953646      | -2.1721608 | -1.8897587 |
| C        | -0.4897589      | -4.3660556 | 1.8174937  |
| C        | -2.2092051      | -3.9808568 | -0.8207919 |
| O        | -0.4327074      | -5.4952497 | 1.3644233  |
| H        | -0.4623753      | -4.1950755 | 2.9197000  |
| O        | -2.9085256      | -4.7513322 | -0.1860201 |
| H        | -2.2344486      | -3.9821316 | -1.9356302 |

NHC  $R_1=C(CH_3)_3$   $R_2=Br$

33

|          |                  |            |            |
|----------|------------------|------------|------------|
| Energy = | -5688.5729465310 |            |            |
| C        | -0.1478688       | -0.9572705 | 0.1873545  |
| N        | 0.1076897        | -1.8474471 | 1.1960123  |
| C        | -0.5780026       | -3.0391936 | 0.9790988  |
| C        | -1.2749605       | -2.8885207 | -0.1934347 |
| N        | -1.0005156       | -1.6076431 | -0.6637852 |
| C        | 1.0130029        | -1.5028487 | 2.3466477  |
| C        | -1.5312826       | -0.9511331 | -1.9092955 |
| C        | -3.0629637       | -0.8464675 | -1.8113884 |
| C        | -1.0939169       | -1.7656252 | -3.1388561 |

|    |            |            |            |
|----|------------|------------|------------|
| C  | -0.9406383 | 0.4603237  | -2.0112833 |
| C  | 1.5343376  | -0.0736570 | 2.1513961  |
| C  | 2.2084027  | -2.4715813 | 2.3618479  |
| C  | 0.2122233  | -1.5696890 | 3.6583959  |
| H  | -1.4288166 | -1.2534476 | -4.0516092 |
| H  | -1.5193281 | -2.7758153 | -3.1420323 |
| H  | 0.0013353  | -1.8467016 | -3.1736266 |
| H  | -1.3337422 | 0.9231842  | -2.9282059 |
| H  | 0.1542924  | 0.4383250  | -2.0623272 |
| H  | -1.2194647 | 1.0790268  | -1.1502989 |
| H  | 2.0944776  | 0.0280903  | 1.2145864  |
| H  | 2.1994771  | 0.1603806  | 2.9951047  |
| H  | 0.7156709  | 0.6555629  | 2.1285781  |
| H  | 2.7604314  | -2.4119964 | 1.4137385  |
| H  | 1.8985618  | -3.5113462 | 2.5213753  |
| H  | 2.8926024  | -2.1935854 | 3.1750320  |
| H  | -0.1638067 | -2.5791755 | 3.8641301  |
| H  | -0.6409222 | -0.8780639 | 3.6201875  |
| H  | 0.8583690  | -1.2712502 | 4.4955821  |
| H  | -3.4514344 | -0.3355690 | -2.7033765 |
| H  | -3.3491180 | -0.2589913 | -0.9278175 |
| H  | -3.5440280 | -1.8298346 | -1.7480466 |
| Br | -0.5957222 | -4.6092530 | 2.0363054  |
| Br | -2.3834819 | -4.2202766 | -0.9556592 |

NHC  $R_1=C(CH_3)_3$   $R_2=Cl$

33

Energy = -1460.2158081000

|   |            |            |            |
|---|------------|------------|------------|
| C | -0.1418398 | -0.9421098 | 0.1862157  |
| N | 0.1075946  | -1.8350703 | 1.1949431  |
| C | -0.5770443 | -3.0282610 | 0.9785283  |
| C | -1.2698591 | -2.8786410 | -0.1941728 |
| N | -0.9923218 | -1.5976846 | -0.6647683 |
| C | 1.0084684  | -1.5075803 | 2.3520633  |
| C | -1.5307508 | -0.9580931 | -1.9131099 |
| C | -3.0624127 | -0.8541037 | -1.8046676 |
| C | -1.1058081 | -1.7907517 | -3.1356093 |
| C | -0.9392388 | 0.4508136  | -2.0397317 |
| C | 1.5305308  | -0.0761978 | 2.1797912  |
| C | 2.2012965  | -2.4803233 | 2.3567363  |
| C | 0.2039362  | -1.5951657 | 3.6610158  |
| H | -1.4453941 | -1.2884047 | -4.0519231 |
| H | -1.5349317 | -2.7992690 | -3.1236870 |
| H | -0.0111879 | -1.8765482 | -3.1781254 |
| H | -1.3408836 | 0.9039515  | -2.9578399 |
| H | 0.1550755  | 0.4245757  | -2.1022306 |
| H | -1.2055693 | 1.0801096  | -1.1825349 |
| H | 2.0909602  | 0.0396679  | 1.2448074  |
| H | 2.1940465  | 0.1465322  | 3.0277615  |
| H | 0.7108910  | 0.6524011  | 2.1657113  |
| H | 2.7599749  | -2.4041706 | 1.4136201  |
| H | 1.8864126  | -3.5219323 | 2.4932149  |
| H | 2.8809468  | -2.2211639 | 3.1799043  |



|    |            |            |            |
|----|------------|------------|------------|
| H  | -0.1675506 | -2.6087350 | 3.8538859  |
| H  | -0.6527593 | -0.9075793 | 3.6285593  |
| H  | 0.8461346  | -1.3030281 | 4.5035282  |
| H  | -3.4596704 | -0.3610290 | -2.7026748 |
| H  | -3.3430104 | -0.2509770 | -0.9299642 |
| H  | -3.5401747 | -1.8374340 | -1.7186233 |
| Cl | -0.5809493 | -4.4472797 | 1.9555481  |
| Cl | -2.2841018 | -4.0779883 | -0.9018421 |

NHC  $R_1=C(CH_3)_3$   $R_2=COOCH_3$

45

|          |                 |            |            |
|----------|-----------------|------------|------------|
| Energy = | -996.8530323498 |            |            |
| C        | -0.1276512      | -0.9102740 | 0.1480437  |
| N        | 0.2681401       | -1.8348049 | 1.0871702  |
| C        | -0.3517460      | -3.0552709 | 0.8892482  |
| C        | -1.1744945      | -2.9206119 | -0.2139480 |
| N        | -0.9976485      | -1.5813552 | -0.6510137 |
| C        | 1.1540703       | -1.4434431 | 2.2421672  |
| C        | -1.6295901      | -0.8725975 | -1.8259085 |
| C        | -3.1522477      | -0.8029720 | -1.6192376 |
| C        | -1.2334354      | -1.5860298 | -3.1303337 |
| C        | -1.0903965      | 0.5648213  | -1.8920044 |
| C        | 1.8012086       | -0.0870662 | 1.9324833  |
| C        | 2.2674049       | -2.4833052 | 2.4444785  |
| C        | 0.2740405       | -1.3197437 | 3.4981524  |
| H        | -1.6506132      | -1.0343555 | -3.9847677 |
| H        | -1.6041520      | -2.6137615 | -3.1741606 |
| H        | -0.1395197      | -1.5972185 | -3.2357269 |
| H        | -1.5624107      | 1.0534898  | -2.7575487 |
| H        | -0.0017760      | 0.5841832  | -2.0188926 |
| H        | -1.3262631      | 1.1324190  | -0.9847921 |
| H        | 2.4278494       | -0.1407450 | 1.0326689  |
| H        | 2.4334166       | 0.1905165  | 2.7885579  |
| H        | 1.0490745       | 0.6909575  | 1.7667059  |
| H        | 2.8241326       | -2.6468246 | 1.5117242  |
| H        | 1.8963816       | -3.4526270 | 2.7949304  |
| H        | 2.9682861       | -2.1059691 | 3.2015929  |
| H        | -0.2331077      | -2.2648778 | 3.7320135  |
| H        | -0.4881576      | -0.5414888 | 3.3530775  |
| H        | 0.8957597       | -1.0372805 | 4.3593802  |
| H        | -3.6110693      | -0.2611099 | -2.4582177 |
| H        | -3.3792654      | -0.2531107 | -0.6946532 |
| H        | -3.6103762      | -1.7950844 | -1.5634484 |
| C        | -0.0859502      | -4.3436072 | 1.6130949  |
| C        | -2.0000639      | -4.0640967 | -0.6426668 |
| O        | 0.7598617       | -5.1439739 | 1.2702876  |
| O        | -0.8762069      | -4.4770706 | 2.7039365  |
| O        | -2.0137934      | -5.1229835 | -0.0290773 |
| O        | -2.7508246      | -3.8733686 | -1.7606125 |
| C        | -0.7502575      | -5.7479513 | 3.3871759  |
| H        | -1.4380340      | -5.6902350 | 4.2361173  |
| H        | 0.2811313       | -5.9028412 | 3.7286342  |

|   |            |            |            |
|---|------------|------------|------------|
| H | -1.0342794 | -6.5621652 | 2.7088048  |
| C | -3.5481464 | -5.0150268 | -2.1517966 |
| H | -4.0957852 | -4.6912029 | -3.0425686 |
| H | -4.2402595 | -5.2935320 | -1.3475326 |
| H | -2.9031657 | -5.8726347 | -2.3816877 |

NHC  $R_1=C(CH_3)_3$   $R_2=F$

33

|          |                 |            |            |
|----------|-----------------|------------|------------|
| Energy = | -739.4522219328 |            |            |
| C        | -0.1221343      | -0.8886545 | 0.1812258  |
| N        | 0.1184938       | -1.7889564 | 1.1917574  |
| C        | -0.5743593      | -2.9680723 | 0.9756738  |
| C        | -1.2656571      | -2.8179013 | -0.1833938 |
| N        | -0.9841006      | -1.5493166 | -0.6618633 |
| C        | 1.0099725       | -1.5161422 | 2.3638001  |
| C        | -1.5361131      | -0.9632939 | -1.9242411 |
| C        | -3.0694808      | -0.8956633 | -1.8092444 |
| C        | -1.1095764      | -1.8493404 | -3.1085531 |
| C        | -0.9675932      | 0.4466642  | -2.1049863 |
| C        | 1.5548004       | -0.0898069 | 2.2483889  |
| C        | 2.1759893       | -2.5212845 | 2.3445134  |
| C        | 0.1850173       | -1.6524674 | 3.6564038  |
| H        | -1.4755743      | -1.4109107 | -4.0470154 |
| H        | -1.5161979      | -2.8652660 | -3.0280055 |
| H        | -0.0141439      | -1.9135048 | -3.1640148 |
| H        | -1.3750858      | 0.8629079  | -3.0374665 |
| H        | 0.1271685       | 0.4322271  | -2.1659690 |
| H        | -1.2416547      | 1.1011523  | -1.2689692 |
| H        | 2.1221892       | 0.0495091  | 1.3204577  |
| H        | 2.2149908       | 0.0964444  | 3.1075937  |
| H        | 0.7441513       | 0.6494125  | 2.2524162  |
| H        | 2.7583354       | -2.4148193 | 1.4188680  |
| H        | 1.8227454       | -3.5582106 | 2.4184861  |
| H        | 2.8441947       | -2.3301980 | 3.1951002  |
| H        | -0.1975396      | -2.6717550 | 3.7945001  |
| H        | -0.6656481      | -0.9567177 | 3.6427240  |
| H        | 0.8146388       | -1.4062804 | 4.5224429  |
| H        | -3.4892551      | -0.4534036 | -2.7231758 |
| H        | -3.3620758      | -0.2670549 | -0.9568906 |
| H        | -3.5144116      | -1.8907202 | -1.6793735 |
| F        | -0.5421362      | -4.0431887 | 1.7818690  |
| F        | -2.0790896      | -3.7068679 | -0.7787386 |

NHC  $R_1=C(CH_3)_3$   $R_2=I$

33

|          |                  |            |            |
|----------|------------------|------------|------------|
| Energy = | -1135.3959453570 |            |            |
| C        | -0.1554998       | -0.9762017 | 0.1895786  |
| N        | 0.1019118        | -1.8617765 | 1.1988424  |
| C        | -0.5835031       | -3.0572404 | 0.9845945  |
| C        | -1.2842607       | -2.9046319 | -0.1933923 |

|   |            |            |            |
|---|------------|------------|------------|
| N | -1.0066308 | -1.6215015 | -0.6627277 |
| C | 1.0120715  | -1.4960231 | 2.3405970  |
| C | -1.5251003 | -0.9449646 | -1.9049386 |
| C | -3.0549998 | -0.8208004 | -1.8128409 |
| C | -1.0890891 | -1.7452418 | -3.1435811 |
| C | -0.9193338 | 0.4620046  | -1.9884576 |
| C | 1.5153871  | -0.0617206 | 2.1288910  |
| C | 2.2213790  | -2.4466266 | 2.3543839  |
| C | 0.2237874  | -1.5547406 | 3.6598760  |
| H | -1.4120227 | -1.2146723 | -4.0502747 |
| H | -1.5268485 | -2.7503455 | -3.1676534 |
| H | 0.0055203  | -1.8396592 | -3.1724664 |
| H | -1.3042500 | 0.9378883  | -2.9024838 |
| H | 0.1756956  | 0.4302859  | -2.0360951 |
| H | -1.1961322 | 1.0754152  | -1.1226550 |
| H | 2.0681386  | 0.0399935  | 1.1875018  |
| H | 2.1839238  | 0.1860763  | 2.9660295  |
| H | 0.6884352  | 0.6582982  | 2.1072804  |
| H | 2.7605257  | -2.3917912 | 1.3986782  |
| H | 1.9295934  | -3.4888095 | 2.5318742  |
| H | 2.9115402  | -2.1483316 | 3.1553115  |
| H | -0.1323147 | -2.5665882 | 3.8884396  |
| H | -0.6419099 | -0.8792863 | 3.6176163  |
| H | 0.8719336  | -1.2303286 | 4.4857505  |
| H | -3.4325418 | -0.2864384 | -2.6959332 |
| H | -3.3371138 | -0.2479066 | -0.9183001 |
| H | -3.5508538 | -1.7983107 | -1.7727229 |
| I | -0.6095742 | -4.8113915 | 2.1449953  |
| I | -2.5170538 | -4.3961125 | -1.0213781 |

NHC  $R_1=C(CH_3)_3$   $R_2=COCH_3$

43

|          |                 |            |            |
|----------|-----------------|------------|------------|
| Energy = | -846.3022312303 |            |            |
| C        | -0.1411370      | -0.9035687 | 0.1882736  |
| N        | 0.2427591       | -1.8488745 | 1.1021640  |
| C        | -0.4601388      | -3.0440036 | 0.9341632  |
| C        | -1.2758839      | -2.8675911 | -0.1625651 |
| N        | -1.0573331      | -1.5375643 | -0.5918640 |
| C        | 1.2734383       | -1.5118600 | 2.1479845  |
| C        | -1.8091373      | -0.7871833 | -1.6590322 |
| C        | -3.3040139      | -1.1340293 | -1.5751238 |
| C        | -1.2148182      | -1.1216036 | -3.0374746 |
| C        | -1.6514673      | 0.7214925  | -1.4144294 |
| C        | 2.3110734       | -0.5692829 | 1.5177702  |
| C        | 1.9941566       | -2.7734345 | 2.6380594  |
| C        | 0.5628140       | -0.7964360 | 3.3096513  |
| H        | -1.7419689      | -0.5548862 | -3.8178848 |
| H        | -1.2951144      | -2.1864819 | -3.2813745 |
| H        | -0.1534347      | -0.8397002 | -3.0660357 |
| H        | -2.2145323      | 1.2554680  | -2.1942951 |
| H        | -0.6005331      | 1.0258570  | -1.4517368 |
| H        | -2.0462761      | 1.0096911  | -0.4317526 |

|   |            |            |            |
|---|------------|------------|------------|
| H | 2.8332103  | -1.0632770 | 0.6866262  |
| H | 3.0522891  | -0.2958833 | 2.2822747  |
| H | 1.8330071  | 0.3361719  | 1.1297391  |
| H | 2.4171375  | -3.3460128 | 1.8022713  |
| H | 1.3477828  | -3.4376293 | 3.2253990  |
| H | 2.8196261  | -2.4691267 | 3.2958494  |
| H | -0.1894373 | -1.4426392 | 3.7834200  |
| H | 0.0602136  | 0.1079334  | 2.9417082  |
| H | 1.2929555  | -0.5053127 | 4.0777750  |
| H | -3.8563814 | -0.5285094 | -2.3065457 |
| H | -3.6974896 | -0.9051154 | -0.5750819 |
| H | -3.5195251 | -2.1866482 | -1.7922844 |
| C | -0.3658375 | -4.3347863 | 1.7173097  |
| C | -2.1039982 | -3.9903870 | -0.6940634 |
| O | 0.2295828  | -5.2909592 | 1.2463479  |
| C | -1.1290937 | -4.4128433 | 3.0189270  |
| O | -2.7950916 | -4.6370708 | 0.0890903  |
| C | -1.9817654 | -4.4303083 | -2.1420426 |
| H | -1.0802239 | -3.4782280 | 3.5931222  |
| H | -0.7772658 | -5.2609456 | 3.6184010  |
| H | -2.1863951 | -4.5718137 | 2.7509018  |
| H | -2.6867802 | -3.8869271 | -2.7876943 |
| H | -2.2386498 | -5.4952750 | -2.1875779 |
| H | -0.9685428 | -4.2692352 | -2.5328301 |

NHC  $R_1=C(CH_3)_3$   $R_2=OCH_3$

41

|          |                 |            |            |
|----------|-----------------|------------|------------|
| Energy = | -770.0251475299 |            |            |
| C        | -0.1086653      | -0.7616589 | 0.1881485  |
| N        | 0.2307285       | -1.7111871 | 1.1144061  |
| C        | -0.3077277      | -2.9648962 | 0.7920455  |
| C        | -1.0135701      | -2.7914102 | -0.3745803 |
| N        | -0.8842554      | -1.4387392 | -0.7144573 |
| C        | 1.1413062       | -1.4189243 | 2.2665441  |
| C        | -1.4209348      | -0.7950874 | -1.9552589 |
| C        | -2.9476065      | -0.9795072 | -2.0202157 |
| C        | -0.7380459      | -1.4327078 | -3.1789318 |
| C        | -1.1058579      | 0.7051580  | -1.9168129 |
| C        | 1.5310020       | 0.0635820  | 2.2289623  |
| C        | 2.4125033       | -2.2794832 | 2.1385728  |
| C        | 0.4128129       | -1.7107892 | 3.5902478  |
| H        | -1.1095657      | -0.9639757 | -4.1013663 |
| H        | -0.9367374      | -2.5107632 | -3.2329118 |
| H        | 0.3491020       | -1.2783275 | -3.1283673 |
| H        | -1.4989234      | 1.1598990  | -2.8381245 |
| H        | -0.0274127      | 0.8879243  | -1.8526451 |
| H        | -1.5717755      | 1.1898995  | -1.0498907 |
| H        | 2.0515253       | 0.3153933  | 1.2977054  |
| H        | 2.1955197       | 0.2645884  | 3.0820641  |
| H        | 0.6504942       | 0.7135977  | 2.2949136  |
| H        | 2.9286738       | -2.0554962 | 1.1945553  |
| H        | 2.1805250       | -3.3510017 | 2.1641086  |

|   |            |            |            |
|---|------------|------------|------------|
| H | 3.0983414  | -2.0512407 | 2.9664486  |
| H | 0.1898390  | -2.7778234 | 3.7101601  |
| H | -0.5266131 | -1.1432976 | 3.6457627  |
| H | 1.0457401  | -1.4056046 | 4.4353490  |
| H | -3.3483267 | -0.4179974 | -2.8760880 |
| H | -3.4217874 | -0.5916327 | -1.1071728 |
| H | -3.2284665 | -2.0312801 | -2.1498389 |
| O | -0.0304056 | -4.1075570 | 1.4825154  |
| O | -1.6178624 | -3.7110156 | -1.1808143 |
| C | -1.0695680 | -4.6429942 | 2.3255446  |
| C | -2.8657201 | -4.2682846 | -0.7268029 |
| H | -1.7009808 | -3.8417367 | 2.7359648  |
| H | -0.5713233 | -5.1792584 | 3.1436285  |
| H | -1.6965640 | -5.3528471 | 1.7657166  |
| H | -3.3661036 | -4.6742276 | -1.6150022 |
| H | -3.4987966 | -3.4979642 | -0.2613644 |
| H | -2.6941470 | -5.0848649 | -0.0101386 |

NHC  $R_1=C(CH_3)_3$   $R_2=NH_2$

37

|          |                 |            |            |
|----------|-----------------|------------|------------|
| Energy = | -651.6541930033 |            |            |
| C        | -0.1293606      | -0.8784824 | 0.1706803  |
| N        | 0.0952762       | -1.7863836 | 1.1780280  |
| C        | -0.6296663      | -2.9652503 | 0.9799445  |
| C        | -1.3313690      | -2.8016051 | -0.1876656 |
| N        | -1.0105265      | -1.5111673 | -0.6544679 |
| C        | 0.9997296       | -1.4948972 | 2.3328577  |
| C        | -1.5374535      | -0.8808299 | -1.9051111 |
| C        | -3.0752331      | -0.8315079 | -1.8463090 |
| C        | -1.0605960      | -1.6996083 | -3.1190427 |
| C        | -0.9971387      | 0.5498055  | -2.0159670 |
| C        | 1.6472869       | -0.1190788 | 2.1315300  |
| C        | 2.1153684       | -2.5559385 | 2.3994645  |
| C        | 0.1730143       | -1.4838454 | 3.6318540  |
| H        | -1.4048994      | -1.2234570 | -4.0485103 |
| H        | -1.4525338      | -2.7234455 | -3.0842602 |
| H        | 0.0377931       | -1.7388720 | -3.1399590 |
| H        | -1.3881052      | 0.9924755  | -2.9444840 |
| H        | 0.0985691       | 0.5631763  | -2.0409952 |
| H        | -1.3113865      | 1.1650087  | -1.1638190 |
| H        | 2.2406463       | -0.0849239 | 1.2098175  |
| H        | 2.3030759       | 0.0803689  | 2.9922982  |
| H        | 0.8911141       | 0.6709058  | 2.0612284  |
| H        | 2.6402877       | -2.6252047 | 1.4365751  |
| H        | 1.7355767       | -3.5502621 | 2.6694303  |
| H        | 2.8478144       | -2.2735648 | 3.1681297  |
| H        | -0.3260980      | -2.4465371 | 3.7980171  |
| H        | -0.5918270      | -0.6955611 | 3.5845572  |
| H        | 0.8287553       | -1.2739857 | 4.4890283  |
| H        | -3.4612971      | -0.2954886 | -2.7253829 |
| H        | -3.4085164      | -0.2959047 | -0.9458755 |
| H        | -3.5125602      | -1.8377216 | -1.8480063 |

|   |            |            |            |
|---|------------|------------|------------|
| N | -0.7082556 | -4.0404881 | 1.8873810  |
| N | -2.1590909 | -3.7267453 | -0.8643727 |
| H | -1.4929848 | -4.6487217 | 1.6464250  |
| H | 0.1404624  | -4.6079541 | 1.9306788  |
| H | -3.1140410 | -3.7793776 | -0.5049843 |
| H | -1.7595105 | -4.6658304 | -0.8926530 |

NHC  $R_1=C(CH_3)_3$   $R_2=OH$

35

|          |                 |            |            |
|----------|-----------------|------------|------------|
| Energy = | -691.4095511586 |            |            |
| C        | -0.1411860      | -0.9094244 | 0.1726284  |
| N        | 0.1096269       | -1.8210831 | 1.1765713  |
| C        | -0.5672314      | -3.0097869 | 0.9549344  |
| C        | -1.2691770      | -2.8628924 | -0.2044288 |
| N        | -0.9804341      | -1.5729413 | -0.6775627 |
| C        | 0.9962680       | -1.5365893 | 2.3473756  |
| C        | -1.5221368      | -0.9756050 | -1.9330744 |
| C        | -3.0580518      | -0.9076062 | -1.8385901 |
| C        | -1.0819159      | -1.8381549 | -3.1304827 |
| C        | -0.9692872      | 0.4440744  | -2.0960703 |
| C        | 1.5325120       | -0.1058272 | 2.2330971  |
| C        | 2.1748655       | -2.5278550 | 2.3351906  |
| C        | 0.1734171       | -1.6736444 | 3.6416935  |
| H        | -1.4698965      | -1.4045855 | -4.0631010 |
| H        | -1.4515069      | -2.8679030 | -3.0468503 |
| H        | 0.0146879       | -1.8662307 | -3.1951889 |
| H        | -1.3494145      | 0.8547188  | -3.0431507 |
| H        | 0.1266803       | 0.4427594  | -2.1155029 |
| H        | -1.2801877      | 1.0943582  | -1.2695294 |
| H        | 2.1082381       | 0.0347914  | 1.3106321  |
| H        | 2.1826089       | 0.0869449  | 3.0991026  |
| H        | 0.7173068       | 0.6279233  | 2.2244241  |
| H        | 2.7547637       | -2.4181407 | 1.4081949  |
| H        | 1.8313587       | -3.5669347 | 2.4135580  |
| H        | 2.8416343       | -2.3218896 | 3.1837411  |
| H        | -0.2133539      | -2.6919861 | 3.7727914  |
| H        | -0.6736869      | -0.9732372 | 3.6294734  |
| H        | 0.8044812       | -1.4321300 | 4.5085392  |
| H        | -3.4646951      | -0.4013689 | -2.7253772 |
| H        | -3.3637293      | -0.3413672 | -0.9478886 |
| H        | -3.5167363      | -1.9062834 | -1.7978472 |
| O        | -0.4949951      | -4.0970116 | 1.7804200  |
| O        | -1.9965104      | -3.8542827 | -0.8312900 |
| H        | -0.9683811      | -4.8225944 | 1.3280494  |
| H        | -2.9502553      | -3.6978547 | -0.6940818 |

NHC  $R_1=C(CH_3)_3$   $R_2=SH$

35

|          |                  |            |           |
|----------|------------------|------------|-----------|
| Energy = | -1337.4001517210 |            |           |
| C        | -0.1579684       | -0.9213556 | 0.1645928 |

|   |            |            |            |
|---|------------|------------|------------|
| N | 0.0837160  | -1.8332958 | 1.1681889  |
| C | -0.5907202 | -3.0280999 | 0.9453375  |
| C | -1.2961491 | -2.8708114 | -0.2341031 |
| N | -0.9994537 | -1.5641880 | -0.6852950 |
| C | 0.9924819  | -1.5215537 | 2.3222639  |
| C | -1.4873946 | -0.9224487 | -1.9517887 |
| C | -3.0248370 | -0.8573578 | -1.9374757 |
| C | -0.9725607 | -1.7297219 | -3.1572078 |
| C | -0.9324306 | 0.5051944  | -2.0342697 |
| C | 1.4957329  | -0.0788673 | 2.1892976  |
| C | 2.1987462  | -2.4771606 | 2.2860366  |
| C | 0.2078447  | -1.6544704 | 3.6392374  |
| H | -1.2648945 | -1.2254931 | -4.0890611 |
| H | -1.3856038 | -2.7455857 | -3.1785680 |
| H | 0.1240431  | -1.7941337 | -3.1313481 |
| H | -1.3018330 | 0.9582012  | -2.9662056 |
| H | 0.1636766  | 0.5132506  | -2.0394235 |
| H | -1.2611975 | 1.1144053  | -1.1838295 |
| H | 2.0517098  | 0.0696249  | 1.2566059  |
| H | 2.1574987  | 0.1299927  | 3.0426243  |
| H | 0.6659998  | 0.6381950  | 2.1946366  |
| H | 2.7465340  | -2.3623459 | 1.3405687  |
| H | 1.9013375  | -3.5294229 | 2.3863185  |
| H | 2.8824852  | -2.2391933 | 3.1121433  |
| H | -0.1677197 | -2.6725881 | 3.8077817  |
| H | -0.6487737 | -0.9662658 | 3.6450544  |
| H | 0.8627646  | -1.3966570 | 4.4829423  |
| H | -3.3772196 | -0.3331103 | -2.8370575 |
| H | -3.3773246 | -0.3015887 | -1.0571697 |
| H | -3.4772016 | -1.8565259 | -1.9313731 |
| S | -0.5699372 | -4.4638666 | 1.9650251  |
| S | -2.2544900 | -4.1276854 | -0.9975316 |
| H | -1.3286632 | -5.1584410 | 1.0665562  |
| H | -3.4457284 | -3.9047797 | -0.3749738 |

(NHC)Ni(CO)<sub>3</sub> complex R<sub>1</sub>=CH<sub>3</sub> R<sub>2</sub>=H

22

|          |                  |           |            |
|----------|------------------|-----------|------------|
| Energy = | -2153.8438617750 |           |            |
| C        | 0.5566346        | 8.7362571 | 24.0069889 |
| N        | 0.7659499        | 7.9055600 | 25.0791164 |
| C        | 0.2345361        | 6.6416288 | 24.8670836 |
| C        | -0.3285758       | 6.6629153 | 23.6292761 |
| N        | -0.1239505       | 7.9383572 | 23.1223355 |
| C        | 1.4589634        | 8.2851289 | 26.3024618 |
| C        | -0.5855043       | 8.3660008 | 21.8073697 |
| H        | 1.7517154        | 9.3355253 | 26.2141506 |
| H        | 2.3563964        | 7.6667571 | 26.4410278 |
| H        | 0.7948308        | 8.1626124 | 27.1686340 |
| H        | -1.0842120       | 7.5209059 | 21.3191101 |
| H        | 0.2626937        | 8.6906122 | 21.1928244 |

|    |            |            |            |
|----|------------|------------|------------|
| H  | -1.2928015 | 9.1984772  | 21.9032439 |
| Ni | 1.1251608  | 10.6333084 | 23.8180209 |
| C  | 0.6356067  | 11.3391624 | 22.2346531 |
| C  | 2.9235528  | 10.6590107 | 23.9428667 |
| C  | 0.3398902  | 11.5716651 | 25.1421450 |
| O  | 4.0781706  | 10.6896253 | 24.0095768 |
| O  | -0.1609640 | 12.1973567 | 25.9766766 |
| O  | 0.3633583  | 11.8738932 | 21.2441781 |
| H  | -0.8497964 | 5.8922090  | 23.0747778 |
| H  | 0.3005848  | 5.8489710  | 25.6026321 |

(NHC)Ni(CO)<sub>3</sub> complex R<sub>1</sub>=CH<sub>3</sub> R<sub>2</sub>=OH

24

|          |                  |            |            |
|----------|------------------|------------|------------|
| Energy = | -2304.3600332990 |            |            |
| C        | 0.5991160        | 8.7224982  | 23.9432709 |
| N        | 0.7664903        | 7.8910068  | 25.0319548 |
| C        | 0.1984598        | 6.6506904  | 24.8141354 |
| C        | -0.3544578       | 6.6748726  | 23.5687410 |
| N        | -0.0763260       | 7.9456930  | 23.0437631 |
| C        | 1.4488445        | 8.2437156  | 26.2690021 |
| C        | -0.4864078       | 8.3597857  | 21.7101172 |
| H        | 1.8226665        | 9.2655187  | 26.1557853 |
| H        | 2.2860329        | 7.5570036  | 26.4505605 |
| H        | 0.7548886        | 8.1952182  | 27.1187824 |
| H        | -0.6620597       | 7.4628415  | 21.1042512 |
| H        | 0.3128487        | 8.9547624  | 21.2581615 |
| H        | -1.4034830       | 8.9641270  | 21.7467174 |
| O        | 0.2773609        | 5.6853941  | 25.7654103 |
| O        | -0.9219143       | 5.6478314  | 22.8641831 |
| H        | -0.0519509       | 4.8527223  | 25.3793393 |
| H        | -1.8936214       | 5.7381931  | 22.8611347 |
| Ni       | 1.1517536        | 10.6333315 | 23.8112149 |
| C        | 0.6451696        | 11.4028107 | 22.2640089 |
| C        | 2.9488487        | 10.7050701 | 23.9504177 |
| C        | 0.3228202        | 11.4911273 | 25.1609919 |
| O        | 4.1006631        | 10.7805473 | 24.0281805 |
| O        | -0.2204135       | 12.0597091 | 26.0098163 |
| O        | 0.3511608        | 11.9900595 | 21.3098692 |

(NHC)Ni(CO)<sub>3</sub> complex R<sub>1</sub>=C(CH<sub>3</sub>)<sub>3</sub> R<sub>2</sub>=C<sub>6</sub>H<sub>5</sub>

60

|          |                  |           |            |
|----------|------------------|-----------|------------|
| Energy = | -2852.0503029310 |           |            |
| C        | 0.6284688        | 8.6285999 | 24.0315708 |
| N        | 0.3250788        | 8.0722349 | 25.2573930 |
| C        | -0.5929736       | 7.0151042 | 25.1077547 |
| C        | -0.7911750       | 6.8491991 | 23.7616710 |
| N        | 0.0094554        | 7.8078540 | 23.1113922 |
| C        | 1.0859598        | 8.3379663 | 26.5483137 |
| C        | 0.3730946        | 7.7298942 | 21.6341062 |



|    |            |            |            |
|----|------------|------------|------------|
| C  | 2.3705957  | 9.1309068  | 26.2812605 |
| C  | 1.5304503  | 6.9846504  | 27.1392590 |
| C  | 0.2032945  | 9.0904107  | 27.5563145 |
| C  | 0.6352303  | 6.2532483  | 21.2738999 |
| C  | 1.6790314  | 8.4828617  | 21.3507904 |
| C  | -0.7591047 | 8.2921522  | 20.7611237 |
| Ni | 0.9177638  | 10.6864921 | 23.7299787 |
| C  | -0.1095537 | 11.3191040 | 22.3882077 |
| C  | 2.6542609  | 11.0918875 | 23.4405180 |
| C  | 0.2398875  | 11.6318176 | 25.1089080 |
| O  | 3.7503590  | 11.4054130 | 23.2466338 |
| O  | -0.1991290 | 12.4063612 | 25.8507864 |
| O  | -0.7298303 | 11.9369320 | 21.6286196 |
| C  | -1.8333347 | 5.9782908  | 23.1619894 |
| C  | -1.3934193 | 6.3462353  | 26.1654853 |
| H  | -0.4496593 | 8.2671437  | 19.7064416 |
| H  | -0.9853435 | 9.3318718  | 21.0231636 |
| H  | -1.6749443 | 7.6966250  | 20.8563989 |
| H  | 1.0412510  | 6.2129199  | 20.2540953 |
| H  | -0.2702383 | 5.6403038  | 21.2944385 |
| H  | 1.3794979  | 5.8114783  | 21.9518591 |
| H  | 2.9982804  | 8.6333082  | 25.5304715 |
| H  | 2.9317555  | 9.1825057  | 27.2247497 |
| H  | 2.1756572  | 10.1497173 | 25.9381576 |
| H  | -0.1675946 | 10.0317070 | 27.1350366 |
| H  | 0.7962840  | 9.3294393  | 28.4505622 |
| H  | -0.6532395 | 8.4835965  | 27.8741731 |
| H  | 2.1129425  | 6.4104401  | 26.4048748 |
| H  | 0.6913781  | 6.3731386  | 27.4843996 |
| H  | 2.1770342  | 7.1804055  | 28.0053088 |
| H  | 1.9558808  | 8.2889022  | 20.3049134 |
| H  | 2.4921270  | 8.1275754  | 21.9972551 |
| H  | 1.5830779  | 9.5620555  | 21.4895111 |
| C  | -2.4579886 | 7.0325088  | 26.7769322 |
| C  | -3.0324401 | 6.5438318  | 22.6935921 |
| C  | -1.7028442 | 4.5795691  | 23.1418917 |
| C  | -1.1885516 | 4.9977678  | 26.5022465 |
| C  | -4.0598030 | 5.7363501  | 22.2010045 |
| H  | -3.1633192 | 7.6260148  | 22.7347189 |
| C  | -2.7300785 | 3.7713805  | 22.6514378 |
| C  | -3.9105604 | 4.3475070  | 22.1754945 |
| H  | -4.9837413 | 6.1949378  | 21.8456675 |
| H  | -4.7137099 | 3.7165211  | 21.7924357 |
| H  | -2.6067897 | 2.6873980  | 22.6411933 |
| H  | -0.7793505 | 4.1262459  | 23.5032293 |
| C  | -3.2785495 | 6.3947046  | 27.7099645 |

|   |            |           |            |
|---|------------|-----------|------------|
| H | -2.6505420 | 8.0707448 | 26.5032275 |
| C | -2.0096976 | 4.3585093 | 27.4330624 |
| C | -3.0551526 | 5.0563467 | 28.0430261 |
| H | -0.3685966 | 4.4509603 | 26.0350211 |
| H | -1.8315735 | 3.3111386 | 27.6814049 |
| H | -3.6971880 | 4.5572120 | 28.7701040 |
| H | -4.1014107 | 6.9439310 | 28.1697890 |

(NHC)Ni(CO)<sub>3</sub> complex R<sub>1</sub>=C(CH<sub>3</sub>)<sub>3</sub> R<sub>2</sub>=COCH<sub>3</sub>

50

|          |                  |            |            |
|----------|------------------|------------|------------|
| Energy = | -2695.1862008350 |            |            |
| C        | 0.6513715        | 8.6255383  | 24.1367238 |
| N        | 0.7000170        | 7.7873646  | 25.2380599 |
| C        | -0.0069410       | 6.6030241  | 24.9973775 |
| C        | -0.4723556       | 6.6718094  | 23.7086325 |
| N        | -0.0495655       | 7.9004864  | 23.1876910 |
| C        | 1.6557841        | 7.9449070  | 26.4200828 |
| C        | -0.2578836       | 8.2604692  | 21.7181510 |
| C        | 2.9933635        | 8.5118094  | 25.9158931 |
| C        | 1.9729493        | 6.5660617  | 27.0231645 |
| C        | 1.0303369        | 8.8366231  | 27.5048851 |
| C        | -0.1822645       | 6.9762775  | 20.8676052 |
| C        | 0.8632348        | 9.1694700  | 21.2036077 |
| C        | -1.6281236       | 8.9335019  | 21.5507715 |
| Ni       | 1.0538899        | 10.6707139 | 24.1343486 |
| C        | -0.3708831       | 11.5735289 | 23.4836974 |
| C        | 2.5878283        | 11.0348960 | 23.2490816 |
| C        | 1.2431189        | 11.5223745 | 25.7208249 |
| O        | 3.5713193        | 11.3362817 | 22.7218037 |
| O        | 1.3911163        | 12.2952522 | 26.5707230 |
| O        | -1.2094194       | 12.3101026 | 23.1776543 |
| C        | -1.5323497       | 5.7517602  | 23.1308849 |
| C        | -0.5385414       | 5.6124656  | 25.9969241 |
| H        | -1.7821585       | 9.1847708  | 20.4915113 |
| H        | -1.6817424       | 9.8617300  | 22.1296797 |
| H        | -2.4382440       | 8.2709814  | 21.8777309 |
| H        | -0.1535586       | 7.2741671  | 19.8117007 |
| H        | -1.0506487       | 6.3199262  | 20.9782553 |
| H        | 0.7363118        | 6.4112013  | 21.0792480 |
| H        | 3.4229099        | 7.8568389  | 25.1448351 |
| H        | 3.6936876        | 8.5550867  | 26.7616780 |
| H        | 2.8882660        | 9.5154118  | 25.4962450 |
| H        | 0.5771991        | 9.7322694  | 27.0712359 |
| H        | 1.8055742        | 9.1543447  | 28.2151700 |
| H        | 0.2612876        | 8.2983348  | 28.0738517 |

|   |            |            |            |
|---|------------|------------|------------|
| H | 2.3442105  | 5.8591829  | 26.2694199 |
| H | 1.1237784  | 6.1127967  | 27.5483665 |
| H | 2.7623855  | 6.7061606  | 27.7740423 |
| H | 0.7375836  | 9.2744438  | 20.1171276 |
| H | 1.8539100  | 8.7345223  | 21.3947135 |
| H | 0.8311618  | 10.1650691 | 21.6484361 |
| O | -0.3784916 | 4.4084402  | 25.8476406 |
| O | -2.6665302 | 6.1798061  | 22.9670327 |
| C | -1.1489719 | 4.3248515  | 22.8449661 |
| C | -1.4529382 | 6.1483404  | 27.0815644 |
| H | -0.2507361 | 4.2856890  | 22.2121953 |
| H | -1.9845647 | 3.8037892  | 22.3641722 |
| H | -0.8777249 | 3.8296733  | 23.7899712 |
| H | -1.2702505 | 7.1987821  | 27.3303543 |
| H | -1.3979945 | 5.5131535  | 27.9740777 |
| H | -2.4796238 | 6.0826086  | 26.6846623 |

(NHC)Ni(CO)<sub>3</sub> complex R<sub>1</sub>=C(CH<sub>3</sub>)<sub>3</sub> R<sub>2</sub>=OCH<sub>3</sub>

48

|          |                  |            |            |
|----------|------------------|------------|------------|
| Energy = | -2618.9146779010 |            |            |
| C        | 0.6566611        | 8.6738832  | 23.9531761 |
| N        | 0.7542368        | 7.7715363  | 24.9956625 |
| C        | -0.0416434       | 6.6483653  | 24.7426044 |
| C        | -0.5466811       | 6.7895408  | 23.4823156 |
| N        | -0.0825198       | 8.0112275  | 22.9868936 |
| C        | 1.7920204        | 7.7671366  | 26.1019151 |
| C        | -0.2389137       | 8.3998537  | 21.5321264 |
| C        | 2.8186485        | 8.8869297  | 25.9115353 |
| C        | 2.5642627        | 6.4322724  | 26.0080529 |
| C        | 1.1022978        | 7.9009351  | 27.4686622 |
| C        | 0.1928331        | 7.2005141  | 20.6588979 |
| C        | 0.6923768        | 9.5597838  | 21.1672471 |
| C        | -1.7052383       | 8.7683892  | 21.2574425 |
| Ni       | 0.5461431        | 10.7438901 | 24.3009195 |
| C        | -0.9279528       | 11.4446440 | 23.5337843 |
| C        | 2.0463785        | 11.5932232 | 23.7628607 |
| C        | 0.1830829        | 11.0743875 | 26.0365499 |
| O        | 2.9844477        | 12.1880122 | 23.4407673 |
| O        | -0.1234597       | 11.4723104 | 27.0812097 |
| O        | -1.8505425       | 12.0536074 | 23.1861073 |
| O        | -1.4287060       | 6.0014675  | 22.8140076 |
| O        | -0.2803971       | 5.6492897  | 25.6400218 |
| H        | -1.8239323       | 9.0464570  | 20.2006476 |
| H        | -2.0160301       | 9.6227457  | 21.8710141 |
| H        | -2.3721159       | 7.9224765  | 21.4671863 |

|   |            |            |            |
|---|------------|------------|------------|
| H | 0.2081119  | 7.5220830  | 19.6087327 |
| H | -0.4945262 | 6.3531577  | 20.7384809 |
| H | 1.2077640  | 6.8724615  | 20.9242709 |
| H | 3.2792804  | 8.8398558  | 24.9166261 |
| H | 3.6048653  | 8.7466935  | 26.6671123 |
| H | 2.3889217  | 9.8838513  | 26.0375854 |
| H | 0.5055995  | 8.8196469  | 27.5208380 |
| H | 1.8651147  | 7.9457456  | 28.2591458 |
| H | 0.4544286  | 7.0409885  | 27.6772964 |
| H | 3.0536040  | 6.3404274  | 25.0280891 |
| H | 1.9190113  | 5.5620690  | 26.1679524 |
| H | 3.3472331  | 6.4250613  | 26.7794435 |
| H | 0.5859561  | 9.7461464  | 20.0893353 |
| H | 1.7411385  | 9.3083870  | 21.3746362 |
| H | 0.4530852  | 10.4803678 | 21.7049561 |
| C | -1.0721557 | 4.6015932  | 22.7369657 |
| C | -1.5992838 | 5.7099530  | 26.2392306 |
| H | -0.9851872 | 4.1585949  | 23.7384711 |
| H | -0.1202826 | 4.4784282  | 22.1982079 |
| H | -1.8824478 | 4.1178148  | 22.1804929 |
| H | -1.6496215 | 4.8724188  | 26.9445373 |
| H | -2.3811134 | 5.6028925  | 25.4727805 |
| H | -1.7381029 | 6.6610629  | 26.7742348 |

(NHC)Ni(CO)<sub>3</sub> complex R<sub>1</sub>=C(CH<sub>3</sub>)<sub>3</sub> R<sub>2</sub>=COOCH<sub>3</sub>

52

|          |                  |            |            |
|----------|------------------|------------|------------|
| Energy = | -2845.7262550740 |            |            |
| C        | 0.5436940        | 8.7406612  | 24.0572826 |
| N        | 0.8755820        | 7.8555920  | 25.0644192 |
| C        | 0.2678709        | 6.6115504  | 24.8453573 |
| C        | -0.3633786       | 6.6826981  | 23.6289300 |
| N        | -0.1733268       | 7.9743813  | 23.1446878 |
| C        | 2.0360618        | 8.0313467  | 26.0501284 |
| C        | -0.6450163       | 8.4153447  | 21.7605395 |
| C        | 3.0698825        | 9.0114630  | 25.4777401 |
| C        | 2.7642326        | 6.6798414  | 26.1980845 |
| C        | 1.5288055        | 8.5170741  | 27.4139112 |
| C        | -0.5172251       | 7.2399944  | 20.7728256 |
| C        | 0.2559572        | 9.5288739  | 21.2140518 |
| C        | -2.1111144       | 8.8655265  | 21.8473152 |
| Ni       | 0.5053982        | 10.8101837 | 24.2683294 |
| C        | -1.0651520       | 11.5321918 | 23.7384043 |
| C        | 1.8782011        | 11.5968449 | 23.3960330 |
| C        | 0.5073463        | 11.4054299 | 25.9783510 |

|   |            |            |            |
|---|------------|------------|------------|
| O | 2.7368304  | 12.1553171 | 22.8605131 |
| O | 0.4435503  | 12.0275998 | 26.9530154 |
| O | -1.9941874 | 12.1862168 | 23.5178721 |
| C | -1.3489663 | 5.6650025  | 23.1070110 |
| C | 0.0070595  | 5.4929421  | 25.7813844 |
| H | -2.4500288 | 9.1917108  | 20.8540182 |
| H | -2.2257424 | 9.7062147  | 22.5390942 |
| H | -2.7555820 | 8.0445127  | 22.1857470 |
| H | -0.7162395 | 7.6306083  | 19.7663624 |
| H | -1.2399688 | 6.4360230  | 20.9404881 |
| H | 0.5012520  | 6.8273198  | 20.7680941 |
| H | 3.4235123  | 8.6867413  | 24.4898596 |
| H | 3.9285973  | 9.0326221  | 26.1628903 |
| H | 2.6757004  | 10.0262028 | 25.3850305 |
| H | 1.0241200  | 9.4839616  | 27.3257029 |
| H | 2.3851353  | 8.6415309  | 28.0921030 |
| H | 0.8320268  | 7.7989865  | 27.8579262 |
| H | 3.0668604  | 6.2786542  | 25.2211173 |
| H | 2.1791834  | 5.9234378  | 26.7307207 |
| H | 3.6753361  | 6.8503343  | 26.7872757 |
| H | -0.0442475 | 9.7253997  | 20.1755059 |
| H | 1.3119372  | 9.2243841  | 21.2158604 |
| H | 0.1667954  | 10.4582908 | 21.7794353 |
| O | -0.8976914 | 4.5369009  | 22.5216156 |
| O | -0.0895110 | 4.3280618  | 25.4314332 |
| O | -2.5438165 | 5.8496300  | 23.2174740 |
| C | 0.5123855  | 4.2417203  | 22.4115777 |
| O | -0.2231974 | 5.9082284  | 27.0513374 |
| C | -0.5693878 | 4.8531761  | 27.9829152 |

(NHC)Ni(CO)<sub>3</sub> complex R<sub>1</sub>=C(CH<sub>3</sub>)<sub>3</sub> R<sub>2</sub>=COCH<sub>3</sub>

44

|          |                  |           |            |
|----------|------------------|-----------|------------|
| Energy = | -2616.5246380680 |           |            |
| C        | 0.6116351        | 8.6987361 | 24.0348390 |
| N        | 0.5364047        | 7.9154089 | 25.1794085 |
| C        | -0.4087765       | 6.9098195 | 25.0213332 |
| C        | -0.8709670       | 6.9834521 | 23.7095079 |
| N        | -0.1710935       | 8.0355128 | 23.1073005 |
| C        | 1.5478043        | 7.9273823 | 26.3215789 |
| C        | -0.0826673       | 8.2290900 | 21.5898415 |
| C        | 2.8118667        | 8.6958427 | 25.9192629 |
| C        | 1.9932064        | 6.4727830 | 26.5815018 |
| C        | 0.9331976        | 8.5539888 | 27.5835220 |
| C        | 0.1341712        | 6.8358758 | 20.9663240 |

|    |            |            |            |
|----|------------|------------|------------|
| C  | 1.1435012  | 9.0703821  | 21.2184195 |
| C  | -1.3600020 | 8.8941137  | 21.0609748 |
| Ni | 0.9211367  | 10.7412771 | 24.0750646 |
| C  | -0.3844642 | 11.5826533 | 23.1476804 |
| C  | 2.5514066  | 11.2585056 | 23.4782853 |
| C  | 0.6247545  | 11.4536021 | 25.7093526 |
| O  | 3.5743151  | 11.6456083 | 23.1084508 |
| O  | 0.4043418  | 12.1163041 | 26.6327449 |
| O  | -1.1633261 | 12.2980047 | 22.6803313 |
| C  | -2.0784383 | 6.2505979  | 23.2722586 |
| C  | -0.9404864 | 6.0547495  | 26.0999849 |
| H  | -1.2710256 | 9.0140222  | 19.9721824 |
| H  | -1.4939906 | 9.8898266  | 21.4990063 |
| H  | -2.2456569 | 8.2834814  | 21.2638746 |
| H  | 0.2697750  | 6.9631287  | 19.8840062 |
| H  | -0.7190032 | 6.1695218  | 21.1160554 |
| H  | 1.0468741  | 6.3710069  | 21.3657734 |
| H  | 3.2510699  | 8.2882383  | 24.9991106 |
| H  | 3.5427895  | 8.5835986  | 26.7322832 |
| H  | 2.6242976  | 9.7611994  | 25.7642384 |
| H  | 0.6069122  | 9.5819352  | 27.3939836 |
| H  | 1.6908768  | 8.5776246  | 28.3790849 |
| H  | 0.0731293  | 7.9869146  | 27.9628369 |
| H  | 2.3835544  | 6.0121966  | 25.6637242 |
| H  | 1.2010009  | 5.8290860  | 26.9834262 |
| H  | 2.8005653  | 6.4862575  | 27.3257244 |
| H  | 1.2267327  | 9.0539497  | 20.1227964 |
| H  | 2.0668982  | 8.6506241  | 21.6384744 |
| H  | 1.0596213  | 10.1105474 | 21.5408245 |
| O  | -1.5219426 | 4.9942540  | 25.9215844 |
| O  | -2.6163367 | 6.2751864  | 22.1741113 |
| H  | -2.5051527 | 5.6500154  | 24.1001539 |
| H  | -0.8235597 | 6.4632038  | 27.1277962 |

HEP complex  $R_1=CH_3$   $R_2=COH$

55

|          |                  |            |            |
|----------|------------------|------------|------------|
| Energy = | -6424.8011267490 |            |            |
| H        | -2.5375169       | -5.4719844 | 3.0378475  |
| C        | -2.8356150       | -5.7873865 | 2.0385777  |
| C        | -4.0534397       | -5.3767305 | 1.4952484  |
| H        | -4.7112113       | -4.7362750 | 2.0833494  |
| C        | -4.4460522       | -5.7729418 | 0.2052778  |
| H        | -5.4049521       | -5.4365535 | -0.1896312 |
| C        | -3.6343924       | -6.5886554 | -0.5838186 |
| H        | -3.9541446       | -6.8872611 | -1.5799486 |
| C        | -2.4093753       | -6.9989078 | -0.0464326 |

|    |            |             |            |
|----|------------|-------------|------------|
| C  | -2.0229352 | -6.6061683  | 1.2503714  |
| N  | -1.3669573 | -7.7884563  | -0.5327397 |
| N  | -0.7761023 | -7.1879483  | 1.4883197  |
| C  | -1.3005486 | -8.4370827  | -1.8615411 |
| C  | -1.2939739 | -7.4018358  | -2.9885020 |
| H  | -2.2381103 | -6.8440089  | -3.0510492 |
| H  | -0.4720548 | -6.6872035  | -2.8499340 |
| H  | -1.1452686 | -7.9142107  | -3.9491360 |
| C  | -2.3759984 | -9.5162011  | -2.0041060 |
| H  | -3.3910215 | -9.0966312  | -1.9800767 |
| H  | -2.2509608 | -10.0330200 | -2.9658497 |
| H  | -2.2819166 | -10.2569025 | -1.1985722 |
| C  | -0.0239630 | -6.9358243  | 2.7431948  |
| C  | 0.9336567  | -5.7537846  | 2.5646118  |
| H  | 1.6948392  | -5.9823577  | 1.8061140  |
| H  | 0.3948196  | -4.8513482  | 2.2440093  |
| H  | 1.4341750  | -5.5331075  | 3.5181183  |
| C  | 0.6634185  | -8.1881736  | 3.2773163  |
| H  | -0.8031620 | -6.6543238  | 3.4670011  |
| H  | 1.4759886  | -8.5107599  | 2.6111557  |
| H  | 1.0897384  | -7.9642561  | 4.2655017  |
| H  | -0.0364672 | -9.0275906  | 3.3735409  |
| C  | -0.3707497 | -7.9015770  | 0.3965323  |
| H  | -0.3142524 | -8.9268340  | -1.8455109 |
| Pd | 1.3461819  | -8.9587744  | 0.0660867  |
| Br | 2.4302327  | -6.9374627  | -0.8900299 |
| Br | 0.2438429  | -11.0621227 | 0.8193553  |
| C  | 3.0455566  | -9.9999724  | -0.3003793 |
| N  | 3.2884871  | -10.8641292 | -1.3293690 |
| N  | 4.2057737  | -9.9838011  | 0.4259910  |
| C  | 4.5739110  | -11.3813571 | -1.2613707 |
| C  | 2.2943088  | -11.1830484 | -2.3527124 |
| C  | 5.1580519  | -10.8217779 | -0.1249555 |
| C  | 4.3677139  | -9.1630091  | 1.6300584  |
| H  | 5.4252747  | -8.9268486  | 1.7647109  |
| H  | 4.0099581  | -9.7193558  | 2.5066402  |
| H  | 3.7710239  | -8.2553520  | 1.4885051  |
| H  | 2.2380441  | -12.2675479 | -2.5004036 |
| H  | 2.5427030  | -10.6834917 | -3.2986312 |
| H  | 1.3282132  | -10.8269356 | -1.9814209 |
| C  | 6.5148962  | -11.0670948 | 0.3860073  |
| C  | 5.1224299  | -12.3094267 | -2.2519160 |
| O  | 6.2334671  | -12.8169357 | -2.1913135 |
| H  | 4.4419615  | -12.5339360 | -3.1066549 |
| O  | 6.9604687  | -10.5935504 | 1.4232726  |
| H  | 7.1127347  | -11.7381959 | -0.2647903 |

HEP complex  $R_1=CH_3$   $R_2=C_6H_5$

71

Energy = -6660.3324449980

|   |            |            |           |
|---|------------|------------|-----------|
| H | -2.7042101 | -5.5409402 | 3.0211505 |
| C | -2.9886261 | -5.9436129 | 2.0494550 |

|    |            |             |            |
|----|------------|-------------|------------|
| C  | -4.2665573 | -5.7254356  | 1.5325155  |
| H  | -4.9864377 | -5.1489443  | 2.1139896  |
| C  | -4.6389889 | -6.2315326  | 0.2759590  |
| H  | -5.6445006 | -6.0425944  | -0.1010459 |
| C  | -3.7481573 | -6.9705098  | -0.5042298 |
| H  | -4.0521025 | -7.3529506  | -1.4764411 |
| C  | -2.4661453 | -7.1935243  | 0.0094358  |
| C  | -2.0975420 | -6.6868757  | 1.2716542  |
| N  | -1.3435212 | -7.8650043  | -0.4739822 |
| N  | -0.7766769 | -7.0823886  | 1.4898505  |
| C  | -1.2258167 | -8.5585931  | -1.7756977 |
| C  | -1.3180664 | -7.5671546  | -2.9382014 |
| H  | -2.3049741 | -7.0881173  | -3.0003939 |
| H  | -0.5542373 | -6.7844064  | -2.8355710 |
| H  | -1.1445494 | -8.0976503  | -3.8849686 |
| C  | -2.1978724 | -9.7366566  | -1.8758218 |
| H  | -3.2488206 | -9.4162334  | -1.8771061 |
| H  | -2.0139613 | -10.2788866 | -2.8139396 |
| H  | -2.0412330 | -10.4324622 | -1.0408746 |
| C  | -0.0303808 | -6.6579152  | 2.6990462  |
| C  | 0.6753157  | -5.3209688  | 2.4506012  |
| H  | 1.4385974  | -5.4310957  | 1.6672709  |
| H  | -0.0360226 | -4.5467085  | 2.1316610  |
| H  | 1.1612761  | -4.9796925  | 3.3757885  |
| C  | 0.9168409  | -7.7353680  | 3.2154849  |
| H  | -0.8145634 | -6.5130331  | 3.4579723  |
| H  | 1.7543500  | -7.8828484  | 2.5187780  |
| H  | 1.3210517  | -7.4148395  | 4.1861565  |
| H  | 0.4084435  | -8.6996692  | 3.3404526  |
| C  | -0.3091984 | -7.7936639  | 0.4204760  |
| H  | -0.2024086 | -8.9658795  | -1.7449680 |
| Pd | 1.5112951  | -8.6461517  | 0.0436209  |
| Br | 2.3729461  | -6.5065622  | -0.8846771 |
| Br | 0.6855423  | -10.8399839 | 0.8750138  |
| C  | 3.2809459  | -9.5217718  | -0.4320564 |
| N  | 3.6529373  | -9.9831430  | -1.6563088 |
| N  | 4.3440590  | -9.7759004  | 0.3762517  |
| C  | 4.9407957  | -10.5296642 | -1.6258571 |
| C  | 2.8193982  | -9.8341948  | -2.8451851 |
| C  | 5.3874839  | -10.3860516 | -0.3293419 |
| C  | 4.3251885  | -9.5231614  | 1.8131938  |
| H  | 5.0251030  | -10.2035685 | 2.3096296  |
| H  | 3.3088022  | -9.7102072  | 2.1774026  |
| H  | 4.6086768  | -8.4843366  | 2.0302071  |
| H  | 3.4537132  | -9.8625858  | -3.7373625 |
| H  | 2.3107470  | -8.8652075  | -2.7845272 |
| H  | 2.0751525  | -10.6407185 | -2.8989601 |
| C  | 5.6238187  | -11.1023204 | -2.7954191 |
| C  | 6.6707332  | -10.7773798 | 0.2727722  |
| C  | 7.1534397  | -12.0910862 | 0.1316958  |
| C  | 5.0178977  | -12.1076032 | -3.5727008 |
| C  | 6.9132067  | -10.6640238 | -3.1493850 |
| C  | 7.5765932  | -11.2173315 | -4.2449540 |
| C  | 5.6807441  | -12.6530089 | -4.6730924 |



|   |            |             |            |
|---|------------|-------------|------------|
| C | 6.9625387  | -12.2110336 | -5.0125323 |
| H | 7.4802574  | -12.6389802 | -5.8719493 |
| H | 8.5749403  | -10.8632723 | -4.5058786 |
| H | 7.3889277  | -9.8790071  | -2.5610321 |
| H | 4.0287446  | -12.4775049 | -3.2987495 |
| H | 5.1966026  | -13.4331753 | -5.2622602 |
| C | 7.4507898  | -9.8460804  | 0.9843056  |
| C | 8.6743761  | -10.2202412 | 1.5409487  |
| C | 8.3809024  | -12.4602547 | 0.6830584  |
| C | 9.1442239  | -11.5281035 | 1.3917540  |
| H | 6.5533473  | -12.8237169 | -0.4089448 |
| H | 8.7385993  | -13.4841586 | 0.5657044  |
| H | 9.2668686  | -9.4839182  | 2.0859957  |
| H | 10.1009198 | -11.8197499 | 1.8271195  |
| H | 7.1025972  | -8.8168248  | 1.0833641  |

HEP complex  $R_1=CH_3$   $R_2=Br$

51

|          |                   |             |            |
|----------|-------------------|-------------|------------|
| Energy = | -11345.7239381400 |             |            |
| H        | -2.6416238        | -5.4956898  | 3.0113452  |
| C        | -2.9067491        | -5.8186176  | 2.0051840  |
| C        | -4.1212263        | -5.4394184  | 1.4317188  |
| H        | -4.8094882        | -4.8158910  | 2.0029085  |
| C        | -4.4710978        | -5.8455558  | 0.1329353  |
| H        | -5.4279693        | -5.5334074  | -0.2860255 |
| C        | -3.6192991        | -6.6401693  | -0.6351706 |
| H        | -3.9062684        | -6.9469510  | -1.6388543 |
| C        | -2.3983992        | -7.0196415  | -0.0671235 |
| C        | -2.0542702        | -6.6170491  | 1.2385029  |
| N        | -1.3265766        | -7.7848954  | -0.5258472 |
| N        | -0.8006590        | -7.1697878  | 1.5087956  |
| C        | -1.2102767        | -8.4284517  | -1.8537172 |
| C        | -1.2011252        | -7.3894225  | -2.9774700 |
| H        | -2.1551939        | -6.8513677  | -3.0601460 |
| H        | -0.3978797        | -6.6582271  | -2.8175762 |
| H        | -1.0190520        | -7.8950312  | -3.9359460 |
| C        | -2.2539832        | -9.5343031  | -2.0255189 |
| H        | -3.2807058        | -9.1431337  | -2.0177632 |
| H        | -2.0962099        | -10.0399786 | -2.9884903 |
| H        | -2.1541059        | -10.2782921 | -1.2235349 |
| C        | -0.0847340        | -6.8973870  | 2.7797026  |
| C        | 0.8481994         | -5.6926771  | 2.6219038  |
| H        | 1.6312197         | -5.9027796  | 1.8802374  |
| H        | 0.2952242         | -4.8030687  | 2.2895716  |
| H        | 1.3212668         | -5.4605777  | 3.5867926  |
| C        | 0.6203921         | -8.1312161  | 3.3341580  |
| H        | -0.8873521        | -6.6331985  | 3.4843244  |
| H        | 1.4548694         | -8.4375378  | 2.6872096  |
| H        | 1.0179622         | -7.8932921  | 4.3309998  |
| H        | -0.0606639        | -8.9873930  | 3.4167331  |
| C        | -0.3519566        | -7.8764954  | 0.4291549  |
| H        | -0.2125163        | -8.8942751  | -1.8146979 |

|    |           |             |            |
|----|-----------|-------------|------------|
| Pd | 1.3804567 | -8.9065730  | 0.1263372  |
| Br | 2.4486243 | -6.8524241  | -0.7758074 |
| Br | 0.2737421 | -11.0134936 | 0.8681526  |
| C  | 3.0958330 | -9.9379845  | -0.2591937 |
| N  | 3.3180806 | -10.7948102 | -1.2994037 |
| N  | 4.2761229 | -9.8966298  | 0.4261829  |
| C  | 4.6219926 | -11.2743489 | -1.2701360 |
| C  | 2.3220905 | -11.1307110 | -2.3108369 |
| C  | 5.2225694 | -10.7166508 | -0.1757577 |
| Br | 5.3369846 | -12.4587352 | -2.5220174 |
| Br | 6.9600163 | -10.9520938 | 0.4615898  |
| C  | 4.5021437 | -9.1032659  | 1.6277707  |
| H  | 5.4583943 | -8.5732722  | 1.5466790  |
| H  | 4.5101271 | -9.7473070  | 2.5173577  |
| H  | 3.6873608 | -8.3748541  | 1.6923224  |
| H  | 2.4493729 | -12.1769862 | -2.6106352 |
| H  | 2.4324022 | -10.4797109 | -3.1882709 |
| H  | 1.3351346 | -10.9988387 | -1.8546896 |

HEP complex  $R_1=CH_3$   $R_2=H$

51

Energy = -6198.0450219130

|   |            |             |            |
|---|------------|-------------|------------|
| H | -2.6361040 | -5.5456520  | 3.0470060  |
| C | -2.9040076 | -5.8460041  | 2.0345085  |
| C | -4.1155662 | -5.4460729  | 1.4685089  |
| H | -4.7984547 | -4.8276834  | 2.0516698  |
| C | -4.4684190 | -5.8241980  | 0.1619824  |
| H | -5.4225143 | -5.4961825  | -0.2513383 |
| C | -3.6231289 | -6.6116989  | -0.6211812 |
| H | -3.9110789 | -6.8959860  | -1.6311704 |
| C | -2.4061826 | -7.0129007  | -0.0602007 |
| C | -2.0582001 | -6.6362823  | 1.2526610  |
| N | -1.3400179 | -7.7773815  | -0.5330969 |
| N | -0.8077109 | -7.2007123  | 1.5106817  |
| C | -1.2259710 | -8.4031469  | -1.8695529 |
| C | -1.2022502 | -7.3484978  | -2.9783181 |
| H | -2.1510836 | -6.8004418  | -3.0577687 |
| H | -0.3929201 | -6.6274205  | -2.8037222 |
| H | -1.0199848 | -7.8419217  | -3.9432092 |
| C | -2.2794716 | -9.4963242  | -2.0611307 |
| H | -3.3025803 | -9.0957850  | -2.0547519 |
| H | -2.1199231 | -9.9913359  | -3.0294280 |
| H | -2.1908886 | -10.2514017 | -1.2681927 |
| C | -0.0830780 | -6.9484722  | 2.7804852  |
| C | 0.8325765  | -5.7285382  | 2.6382893  |
| H | 1.6026142  | -5.9113983  | 1.8759087  |
| H | 0.2641154  | -4.8362692  | 2.3407674  |
| H | 1.3230580  | -5.5173198  | 3.5992326  |
| C | 0.6488654  | -8.1832062  | 3.2969434  |
| H | -0.8813044 | -6.7124883  | 3.5002925  |
| H | 1.4862643  | -8.4543992  | 2.6379451  |
| H | 1.0462267  | -7.9643061  | 4.2984726  |

|    |            |             |            |
|----|------------|-------------|------------|
| H  | -0.0149504 | -9.0544614  | 3.3591439  |
| C  | -0.3635463 | -7.8900587  | 0.4176754  |
| H  | -0.2332901 | -8.8807725  | -1.8326149 |
| Pd | 1.3703612  | -8.9150136  | 0.0987175  |
| Br | 2.4231241  | -6.8429719  | -0.7900147 |
| Br | 0.2646416  | -11.0299098 | 0.8286657  |
| C  | 3.0921611  | -9.9316128  | -0.2767241 |
| N  | 3.3239701  | -10.8515870 | -1.2558222 |
| N  | 4.2823148  | -9.8312056  | 0.3814189  |
| C  | 4.6306170  | -11.3131214 | -1.2110686 |
| C  | 2.3378656  | -11.2628041 | -2.2491470 |
| C  | 5.2348697  | -10.6729052 | -0.1724958 |
| C  | 4.5115931  | -8.9725991  | 1.5379587  |
| H  | 5.5863979  | -8.7753762  | 1.6268471  |
| H  | 4.1518633  | -9.4575657  | 2.4554234  |
| H  | 3.9797779  | -8.0268614  | 1.3807849  |
| H  | 2.6285117  | -12.2393626 | -2.6537782 |
| H  | 2.2862906  | -10.5292036 | -3.0649302 |
| H  | 1.3618500  | -11.3468499 | -1.7564299 |
| H  | 6.2438368  | -10.7433350 | 0.2144994  |
| H  | 5.0120204  | -12.0454947 | -1.9116124 |

HEP complex  $R_1=CH_3$   $R_2=CH_3$

57

Energy = -6276.7114175010

|   |            |             |            |
|---|------------|-------------|------------|
| H | -2.6425581 | -5.5067562  | 3.0327067  |
| C | -2.9140259 | -5.8185384  | 2.0247033  |
| C | -4.1324379 | -5.4335019  | 1.4631834  |
| H | -4.8172123 | -4.8166810  | 2.0457108  |
| C | -4.4904116 | -5.8257027  | 0.1624412  |
| H | -5.4504726 | -5.5105688  | -0.2471760 |
| C | -3.6422407 | -6.6110635  | -0.6197427 |
| H | -3.9348857 | -6.9071349  | -1.6249742 |
| C | -2.4175947 | -6.9961154  | -0.0640345 |
| C | -2.0659888 | -6.6086285  | 1.2447998  |
| N | -1.3479103 | -7.7543801  | -0.5379523 |
| N | -0.8112067 | -7.1646440  | 1.5003751  |
| C | -1.2380453 | -8.3840617  | -1.8725208 |
| C | -1.2401673 | -7.3342758  | -2.9860446 |
| H | -2.1977081 | -6.8008940  | -3.0594979 |
| H | -0.4406379 | -6.5995364  | -2.8231566 |
| H | -1.0594862 | -7.8296297  | -3.9501333 |
| C | -2.2788860 | -9.4919600  | -2.0486454 |
| H | -3.3071090 | -9.1047178  | -2.0296263 |
| H | -2.1255050 | -9.9873911  | -3.0177783 |
| H | -2.1698190 | -10.2427993 | -1.2540793 |
| C | -0.0875124 | -6.9108828  | 2.7703493  |
| C | 0.8616585  | -5.7184410  | 2.6169003  |
| H | 1.6360976  | -5.9333544  | 1.8674576  |
| H | 0.3188381  | -4.8183063  | 2.2959580  |
| H | 1.3454455  | -5.5019273  | 3.5801498  |
| C | 0.6024458  | -8.1583902  | 3.3141053  |

|    |            |             |            |
|----|------------|-------------|------------|
| H  | -0.8838344 | -6.6399215  | 3.4796782  |
| H  | 1.4328112  | -8.4692236  | 2.6641134  |
| H  | 1.0023857  | -7.9341074  | 4.3134296  |
| H  | -0.0897621 | -9.0065345  | 3.3887720  |
| C  | -0.3670735 | -7.8598770  | 0.4101080  |
| H  | -0.2384316 | -8.8471429  | -1.8438259 |
| Pd | 1.3546939  | -8.9151563  | 0.1072691  |
| Br | 2.4814883  | -6.8785708  | -0.7707649 |
| Br | 0.1784282  | -10.9994527 | 0.8151682  |
| C  | 3.0547429  | -9.9868205  | -0.2360805 |
| N  | 3.2801995  | -10.8930321 | -1.2265056 |
| N  | 4.2204946  | -9.9570262  | 0.4661397  |
| C  | 4.5703216  | -11.4263128 | -1.1516918 |
| C  | 2.3065109  | -11.2319890 | -2.2549775 |
| C  | 5.1665364  | -10.8363953 | -0.0690849 |
| C  | 4.4462203  | -9.1270093  | 1.6400245  |
| H  | 5.4283621  | -8.6421223  | 1.5745173  |
| H  | 4.3949354  | -9.7272768  | 2.5599781  |
| H  | 3.6719391  | -8.3527603  | 1.6571878  |
| H  | 2.3831326  | -12.2977508 | -2.5016815 |
| H  | 2.4726970  | -10.6337637 | -3.1624811 |
| H  | 1.3077049  | -11.0340969 | -1.8521652 |
| C  | 6.5234776  | -11.0182261 | 0.5167348  |
| C  | 5.0840030  | -12.4448061 | -2.1090817 |
| H  | 7.0803178  | -11.7761310 | -0.0475797 |
| H  | 6.4780474  | -11.3528212 | 1.5647314  |
| H  | 7.1124718  | -10.0880519 | 0.4932140  |
| H  | 5.0387664  | -12.0914352 | -3.1507230 |
| H  | 4.5158797  | -13.3870765 | -2.0544533 |
| H  | 6.1320495  | -12.6784761 | -1.8847280 |

HEP complex  $R_1=CH_3$   $R_2=NH_2$

55

Energy = -6308.8117259440

|   |            |            |            |
|---|------------|------------|------------|
| H | -2.6532284 | -5.4943647 | 3.0257588  |
| C | -2.9517386 | -5.8945027 | 2.0572999  |
| C | -4.2342070 | -5.6674935 | 1.5549296  |
| H | -4.9441763 | -5.0872289 | 2.1449152  |
| C | -4.6239598 | -6.1700992 | 0.3022542  |
| H | -5.6326335 | -5.9750482 | -0.0630405 |
| C | -3.7464171 | -6.9138718 | -0.4885076 |
| H | -4.0635387 | -7.2934600 | -1.4575173 |
| C | -2.4607261 | -7.1469890 | 0.0111356  |
| C | -2.0745531 | -6.6438459 | 1.2694866  |
| N | -1.3492286 | -7.8282711 | -0.4842472 |
| N | -0.7553466 | -7.0519913 | 1.4741856  |
| C | -1.2524627 | -8.5243119 | -1.7863832 |
| C | -1.3472705 | -7.5338801 | -2.9498140 |
| H | -2.3315071 | -7.0485049 | -3.0055342 |
| H | -0.5781083 | -6.7555777 | -2.8545357 |
| H | -1.1839532 | -8.0668792 | -3.8970748 |
| C | -2.2402478 | -9.6902034 | -1.8722573 |

|    |            |             |            |
|----|------------|-------------|------------|
| H  | -3.2866018 | -9.3550594  | -1.8619703 |
| H  | -2.0746355 | -10.2387770 | -2.8099570 |
| H  | -2.0823691 | -10.3839136 | -1.0358917 |
| C  | 0.0091620  | -6.6238934  | 2.6706139  |
| C  | 0.6794814  | -5.2695463  | 2.4158029  |
| H  | 1.4339555  | -5.3619499  | 1.6214693  |
| H  | -0.0549204 | -4.5120716  | 2.1089753  |
| H  | 1.1704916  | -4.9180162  | 3.3344510  |
| C  | 0.9911808  | -7.6836385  | 3.1580830  |
| H  | -0.7606814 | -6.5017076  | 3.4484736  |
| H  | 1.8190896  | -7.8088617  | 2.4451534  |
| H  | 1.4075669  | -7.3600484  | 4.1227808  |
| H  | 0.5055111  | -8.6591987  | 3.2875544  |
| C  | -0.3062074 | -7.7697198  | 0.4011178  |
| H  | -0.2333862 | -8.9431234  | -1.7671808 |
| Pd | 1.4934922  | -8.6618888  | 0.0292328  |
| Br | 2.3917113  | -6.5290863  | -0.8836424 |
| Br | 0.5958421  | -10.8308148 | 0.8596306  |
| C  | 3.2423541  | -9.5970542  | -0.4235508 |
| N  | 3.6766404  | -9.9527285  | -1.6672838 |
| N  | 4.2088470  | -10.0354880 | 0.4224897  |
| C  | 4.9011900  | -10.6163512 | -1.6025574 |
| C  | 2.9595226  | -9.6783478  | -2.9044991 |
| C  | 5.2476531  | -10.6705999 | -0.2758144 |
| C  | 4.1673870  | -9.8901107  | 1.8709077  |
| H  | 4.8379932  | -10.6376342 | 2.3093461  |
| H  | 3.1383740  | -10.0624257 | 2.2065690  |
| H  | 4.4941088  | -8.8844338  | 2.1698468  |
| H  | 3.6872526  | -9.6254578  | -3.7231916 |
| H  | 2.4477584  | -8.7152011  | -2.7973688 |
| H  | 2.2257806  | -10.4696331 | -3.1143486 |
| N  | 5.5895852  | -11.0070099 | -2.7585690 |
| N  | 6.3306558  | -11.2645300 | 0.3890119  |
| H  | 6.5925535  | -12.1719037 | 0.0072450  |
| H  | 7.1572925  | -10.6731365 | 0.4815486  |
| H  | 5.2258476  | -11.8542166 | -3.1987791 |
| H  | 6.5882044  | -11.1173884 | -2.5885219 |

HEP complex  $R_1=CH_3$   $R_2=NO_2$

55

Energy = -6607.2663717840

|   |            |            |            |
|---|------------|------------|------------|
| H | -2.6492781 | -5.4905864 | 3.0156485  |
| C | -2.9466242 | -5.9036405 | 2.0524824  |
| C | -4.2332927 | -5.6975384 | 1.5542591  |
| H | -4.9468365 | -5.1201462 | 2.1424023  |
| C | -4.6232523 | -6.2163148 | 0.3079152  |
| H | -5.6350655 | -6.0343319 | -0.0549222 |
| C | -3.7431550 | -6.9597993 | -0.4789888 |
| H | -4.0614383 | -7.3525239 | -1.4422399 |
| C | -2.4529482 | -7.1739735 | 0.0180314  |
| C | -2.0650964 | -6.6497851 | 1.2661758  |
| N | -1.3372762 | -7.8509091 | -0.4756421 |

|    |            |             |            |
|----|------------|-------------|------------|
| N  | -0.7374048 | -7.0352313  | 1.4676196  |
| C  | -1.2451901 | -8.5648389  | -1.7700268 |
| C  | -1.3386727 | -7.5857081  | -2.9429203 |
| H  | -2.3179292 | -7.0902290  | -2.9919485 |
| H  | -0.5614934 | -6.8134350  | -2.8629743 |
| H  | -1.1923030 | -8.1294524  | -3.8865889 |
| C  | -2.2358897 | -9.7289883  | -1.8437274 |
| H  | -3.2811178 | -9.3918588  | -1.8584320 |
| H  | -2.0564164 | -10.2975754 | -2.7665718 |
| H  | -2.0945922 | -10.4064336 | -0.9914996 |
| C  | 0.0214368  | -6.5725279  | 2.6564328  |
| C  | 0.6143941  | -5.1824067  | 2.4010928  |
| H  | 1.3732327  | -5.2322350  | 1.6071987  |
| H  | -0.1604029 | -4.4656076  | 2.0965070  |
| H  | 1.0865649  | -4.8061536  | 3.3195631  |
| C  | 1.0674684  | -7.5762814  | 3.1274682  |
| H  | -0.7439379 | -6.4962252  | 3.4447006  |
| H  | 1.8992129  | -7.6367822  | 2.4108107  |
| H  | 1.4688334  | -7.2369964  | 4.0927735  |
| H  | 0.6419932  | -8.5802290  | 3.2514700  |
| C  | -0.2920814 | -7.7618673  | 0.4013333  |
| H  | -0.2288037 | -8.9891475  | -1.7469698 |
| Pd | 1.5136473  | -8.6289704  | 0.0221229  |
| Br | 2.3732512  | -6.4819113  | -0.8818062 |
| Br | 0.6427958  | -10.7958252 | 0.8692677  |
| C  | 3.2722280  | -9.5304661  | -0.4436550 |
| N  | 3.7217001  | -9.8528425  | -1.6988345 |
| N  | 4.2545617  | -9.9583851  | 0.4104240  |
| C  | 4.9522054  | -10.4688455 | -1.6272752 |
| C  | 2.9947340  | -9.5226664  | -2.9284987 |
| C  | 5.2955030  | -10.5245515 | -0.2951768 |
| C  | 4.1438066  | -9.8767673  | 1.8700270  |
| H  | 4.4788184  | -10.8160085 | 2.3215485  |
| H  | 3.0839538  | -9.7194315  | 2.0927894  |
| H  | 4.7577768  | -9.0508494  | 2.2458576  |
| H  | 3.6801454  | -9.0830525  | -3.6608291 |
| H  | 2.2344675  | -8.7861136  | -2.6510054 |
| H  | 2.5419975  | -10.4279127 | -3.3474127 |
| N  | 5.6933960  | -10.9137589 | -2.7889848 |
| N  | 6.4782811  | -11.0799740 | 0.3255829  |
| O  | 6.8857515  | -10.5060195 | 1.3430313  |
| O  | 6.9739888  | -12.0750105 | -0.2009363 |
| O  | 6.9144923  | -10.7724106 | -2.7641824 |
| O  | 5.0263600  | -11.3915578 | -3.7145766 |

HEP complex  $R_1=CH_3$   $R_2=OH$

53

|          |                  |            |           |
|----------|------------------|------------|-----------|
| Energy = | -6348.5608491550 |            |           |
| H        | -2.6119328       | -5.4538766 | 3.0099753 |
| C        | -2.9238119       | -5.8727446 | 2.0536262 |
| C        | -4.2131739       | -5.6556783 | 1.5652103 |
| H        | -4.9144281       | -5.0637654 | 2.1539990 |

|    |            |             |            |
|----|------------|-------------|------------|
| C  | -4.6205179 | -6.1825547  | 0.3281545  |
| H  | -5.6342655 | -5.9941484  | -0.0262184 |
| C  | -3.7545519 | -6.9420130  | -0.4603765 |
| H  | -4.0857978 | -7.3405895  | -1.4169794 |
| C  | -2.4613259 | -7.1642769  | 0.0249992  |
| C  | -2.0575090 | -6.6360500  | 1.2673375  |
| N  | -1.3547072 | -7.8508344  | -0.4745403 |
| N  | -0.7335055 | -7.0349471  | 1.4596081  |
| C  | -1.2702578 | -8.5607403  | -1.7701968 |
| C  | -1.3791580 | -7.5801437  | -2.9407513 |
| H  | -2.3628467 | -7.0927200  | -2.9855411 |
| H  | -0.6067116 | -6.8030213  | -2.8623246 |
| H  | -1.2313177 | -8.1211832  | -3.8858507 |
| C  | -2.2554966 | -9.7298585  | -1.8369509 |
| H  | -3.3028427 | -9.3985276  | -1.8141658 |
| H  | -2.1004814 | -10.2811966 | -2.7748391 |
| H  | -2.0844367 | -10.4202720 | -1.0005856 |
| C  | 0.0451804  | -6.5830434  | 2.6382560  |
| C  | 0.6999831  | -5.2268673  | 2.3549089  |
| H  | 1.4414954  | -5.3235034  | 1.5490241  |
| H  | -0.0454558 | -4.4786818  | 2.0520793  |
| H  | 1.2045394  | -4.8608337  | 3.2603904  |
| C  | 1.0434836  | -7.6273180  | 3.1258372  |
| H  | -0.7140972 | -6.4566459  | 3.4257909  |
| H  | 1.8643860  | -7.7515942  | 2.4046369  |
| H  | 1.4682118  | -7.2886269  | 4.0816152  |
| H  | 0.5680611  | -8.6055699  | 3.2724051  |
| C  | -0.2987236 | -7.7700979  | 0.3928213  |
| H  | -0.2495815 | -8.9760990  | -1.7569887 |
| Pd | 1.4982294  | -8.6573787  | 0.0034593  |
| Br | 2.3760446  | -6.5230928  | -0.9331972 |
| Br | 0.6110691  | -10.8159098 | 0.8630321  |
| C  | 3.2518925  | -9.5723783  | -0.4744824 |
| N  | 3.7095660  | -9.8446664  | -1.7243349 |
| N  | 4.2302389  | -10.0301275 | 0.3682870  |
| C  | 4.9768040  | -10.4401118 | -1.6722069 |
| C  | 2.9747037  | -9.5764421  | -2.9544647 |
| C  | 5.2873873  | -10.5600802 | -0.3492735 |
| C  | 4.1843445  | -9.9606003  | 1.8237410  |
| H  | 4.7209305  | -10.8203337 | 2.2405501  |
| H  | 3.1326010  | -9.9994936  | 2.1271949  |
| H  | 4.6500512  | -9.0324204  | 2.1824686  |
| H  | 3.6250996  | -9.8007207  | -3.8072195 |
| H  | 2.6740036  | -8.5212999  | -2.9699367 |
| H  | 2.0858483  | -10.2177353 | -3.0069026 |
| O  | 5.6585627  | -10.9102722 | -2.7605891 |
| O  | 6.3685089  | -11.0713182 | 0.2937074  |
| H  | 6.1617786  | -10.1849348 | -3.1773112 |
| H  | 6.8925795  | -11.5775894 | -0.3540079 |

HEP complex  $R_1=CH_3$   $R_2=SH$

Energy = -6994.5532303590

|    |            |             |            |
|----|------------|-------------|------------|
| H  | -2.6904063 | -5.6428682  | 3.1152194  |
| C  | -2.9789080 | -5.9997920  | 2.1271315  |
| C  | -4.2680190 | -5.7812890  | 1.6392858  |
| H  | -4.9904251 | -5.2510215  | 2.2601543  |
| C  | -4.6491484 | -6.2293406  | 0.3632754  |
| H  | -5.6639157 | -6.0427100  | 0.0107871  |
| C  | -3.7547631 | -6.9074523  | -0.4662301 |
| H  | -4.0646178 | -7.2456799  | -1.4527055 |
| C  | -2.4610286 | -7.1295417  | 0.0178432  |
| C  | -2.0839925 | -6.6832388  | 1.3000878  |
| N  | -1.3328802 | -7.7515826  | -0.5163916 |
| N  | -0.7532992 | -7.0650420  | 1.4792720  |
| C  | -1.2212025 | -8.3676767  | -1.8571621 |
| C  | -1.3699392 | -7.3167504  | -2.9602762 |
| H  | -2.3778884 | -6.8807044  | -2.9896081 |
| H  | -0.6417357 | -6.5070701  | -2.8181858 |
| H  | -1.1800830 | -7.7842196  | -3.9365663 |
| C  | -2.1584578 | -9.5687478  | -2.0011645 |
| H  | -3.2178937 | -9.2822328  | -1.9484580 |
| H  | -1.9897588 | -10.0462002 | -2.9767539 |
| H  | -1.9538276 | -10.3079339 | -1.2153279 |
| C  | 0.0117488  | -6.6842059  | 2.6918163  |
| C  | 0.7825470  | -5.3827449  | 2.4515542  |
| H  | 1.5381882  | -5.5192056  | 1.6655232  |
| H  | 0.1072151  | -4.5744790  | 2.1384298  |
| H  | 1.2839956  | -5.0701684  | 3.3785725  |
| C  | 0.8969382  | -7.8163402  | 3.2013757  |
| H  | -0.7640849 | -6.5026446  | 3.4502823  |
| H  | 1.6990087  | -8.0361913  | 2.4832114  |
| H  | 1.3489056  | -7.5134549  | 4.1564788  |
| H  | 0.3267122  | -8.7414768  | 3.3529834  |
| C  | -0.2894034 | -7.7112135  | 0.3677760  |
| H  | -0.1845424 | -8.7405467  | -1.8706925 |
| Pd | 1.5318420  | -8.5411771  | -0.0516124 |
| Br | 2.3762381  | -6.3916644  | -0.9628516 |
| Br | 0.7234079  | -10.7646554 | 0.7232409  |
| C  | 3.2945144  | -9.4236162  | -0.5373804 |
| N  | 3.6851617  | -9.8724018  | -1.7516605 |
| N  | 4.3147868  | -9.7618675  | 0.3140641  |
| C  | 4.9322985  | -10.5221235 | -1.6764804 |
| C  | 2.8871056  | -9.7346263  | -2.9637664 |
| C  | 5.3196566  | -10.4363181 | -0.3562279 |
| C  | 4.2973502  | -9.4797276  | 1.7444447  |
| H  | 5.3209317  | -9.5298519  | 2.1355243  |
| H  | 3.6569947  | -10.2035291 | 2.2656098  |



|   |           |             |            |
|---|-----------|-------------|------------|
| H | 3.9041285 | -8.4688110  | 1.8961884  |
| H | 3.5538891 | -9.7767459  | -3.8324480 |
| H | 2.3762163 | -8.7659583  | -2.9280267 |
| H | 2.1491836 | -10.5461184 | -3.0281292 |
| S | 5.8493791 | -11.1404009 | -3.0221709 |
| S | 6.7659505 | -11.0186710 | 0.4381817  |
| H | 7.3073664 | -11.4323936 | -0.7382567 |
| H | 5.3064796 | -12.3876052 | -3.0919403 |

HEP complex  $R_1=CH_3$   $R_2=F$

51

|          |                  |             |            |
|----------|------------------|-------------|------------|
| Energy = | -6396.5977400020 |             |            |
| H        | -2.6353822       | -5.5654017  | 3.0548154  |
| C        | -2.9049658       | -5.8625185  | 2.0419185  |
| C        | -4.1212533       | -5.4683644  | 1.4825343  |
| H        | -4.8064465       | -4.8578883  | 2.0711555  |
| C        | -4.4766857       | -5.8423370  | 0.1755052  |
| H        | -5.4346370       | -5.5186140  | -0.2322422 |
| C        | -3.6288919       | -6.6193949  | -0.6150839 |
| H        | -3.9194025       | -6.9010752  | -1.6250980 |
| C        | -2.4064686       | -7.0140022  | -0.0610851 |
| C        | -2.0565975       | -6.6425060  | 1.2524940  |
| N        | -1.3366066       | -7.7679563  | -0.5428366 |
| N        | -0.8012179       | -7.2001607  | 1.5033759  |
| C        | -1.2237546       | -8.3830312  | -1.8846587 |
| C        | -1.2155732       | -7.3200210  | -2.9855382 |
| H        | -2.1716503       | -6.7840687  | -3.0590860 |
| H        | -0.4155290       | -6.5893645  | -2.8080815 |
| H        | -1.0291087       | -7.8041632  | -3.9542230 |
| C        | -2.2697014       | -9.4831270  | -2.0782505 |
| H        | -3.2955135       | -9.0898408  | -2.0625088 |
| H        | -2.1128045       | -9.9697676  | -3.0512040 |
| H        | -2.1711278       | -10.2430083 | -1.2910228 |
| C        | -0.0739410       | -6.9495867  | 2.7724505  |
| C        | 0.8401977        | -5.7284786  | 2.6317709  |
| H        | 1.6138324        | -5.9099117  | 1.8727417  |
| H        | 0.2709134        | -4.8378840  | 2.3309934  |
| H        | 1.3261139        | -5.5151719  | 3.5945511  |
| C        | 0.6583362        | -8.1849023  | 3.2870342  |
| H        | -0.8708753       | -6.7149075  | 3.4938459  |
| H        | 1.4934550        | -8.4579556  | 2.6259697  |
| H        | 1.0595036        | -7.9658880  | 4.2869078  |
| H        | -0.0062536       | -9.0553015  | 3.3523095  |
| C        | -0.3578945       | -7.8806231  | 0.4048660  |

|    |            |             |            |
|----|------------|-------------|------------|
| H  | -0.2267206 | -8.8519243  | -1.8571774 |
| Pd | 1.3714649  | -8.9070359  | 0.0887310  |
| Br | 2.4434229  | -6.8378042  | -0.7795668 |
| Br | 0.2355504  | -11.0133795 | 0.7925799  |
| C  | 3.0921925  | -9.9360495  | -0.2714176 |
| N  | 3.3213206  | -10.8627505 | -1.2500033 |
| N  | 4.2772239  | -9.8380963  | 0.4040801  |
| C  | 4.6234766  | -11.3261193 | -1.1840442 |
| C  | 2.3512221  | -11.2887477 | -2.2544445 |
| C  | 5.2200739  | -10.6903804 | -0.1430822 |
| F  | 5.1005383  | -12.2293527 | -2.0366401 |
| F  | 6.4537211  | -10.7927945 | 0.3457526  |
| C  | 4.5256701  | -8.9738842  | 1.5536653  |
| H  | 5.5749385  | -8.6577495  | 1.5472612  |
| H  | 4.3076130  | -9.5056254  | 2.4896244  |
| H  | 3.8783423  | -8.0959371  | 1.4514492  |
| H  | 2.5708686  | -12.3206816 | -2.5504460 |
| H  | 2.4005992  | -10.6353024 | -3.1354136 |
| H  | 1.3576026  | -11.2422725 | -1.7945485 |

HEP complex  $R_1=CH_3$   $R_2=Cl$

51

|          |                  |             |            |
|----------|------------------|-------------|------------|
| Energy = | -7117.3663752980 |             |            |
| H        | -2.6392304       | -5.5249553  | 3.0319952  |
| C        | -2.9035242       | -5.8327239  | 2.0208361  |
| C        | -4.1128270       | -5.4353908  | 1.4487007  |
| H        | -4.7966073       | -4.8125558  | 2.0258910  |
| C        | -4.4623617       | -5.8209809  | 0.1435107  |
| H        | -5.4148858       | -5.4943519  | -0.2745383 |
| C        | -3.6147821       | -6.6124359  | -0.6327278 |
| H        | -3.8999919       | -6.9020117  | -1.6419289 |
| C        | -2.3992221       | -7.0100737  | -0.0659226 |
| C        | -2.0556470       | -6.6284127  | 1.2463399  |
| N        | -1.3315308       | -7.7760045  | -0.5331071 |
| N        | -0.8064345       | -7.1937271  | 1.5115517  |
| C        | -1.2141727       | -8.4016325  | -1.8693590 |
| C        | -1.1953010       | -7.3474819  | -2.9787334 |
| H        | -2.1487088       | -6.8085910  | -3.0635336 |
| H        | -0.3935167       | -6.6186528  | -2.8015370 |
| H        | -1.0040627       | -7.8404324  | -3.9420484 |
| C        | -2.2626216       | -9.4999122  | -2.0597300 |
| H        | -3.2871082       | -9.1030929  | -2.0530329 |
| H        | -2.1022702       | -9.9949829  | -3.0278125 |
| H        | -2.1714163       | -10.2537468 | -1.2658729 |

|    |            |             |            |
|----|------------|-------------|------------|
| C  | -0.0896549 | -6.9421480  | 2.7866143  |
| C  | 0.8488925  | -5.7400191  | 2.6442172  |
| H  | 1.6295237  | -5.9441263  | 1.8983545  |
| H  | 0.3002802  | -4.8431937  | 2.3241480  |
| H  | 1.3249150  | -5.5232034  | 3.6111582  |
| C  | 0.6099133  | -8.1863487  | 3.3250103  |
| H  | -0.8914134 | -6.6833621  | 3.4943379  |
| H  | 1.4465381  | -8.4857652  | 2.6775035  |
| H  | 1.0042423  | -7.9649463  | 4.3270456  |
| H  | -0.0739045 | -9.0416099  | 3.3919922  |
| C  | -0.3596092 | -7.8864001  | 0.4220391  |
| H  | -0.2186151 | -8.8728717  | -1.8331380 |
| Pd | 1.3706672  | -8.9153464  | 0.1099433  |
| Br | 2.4261181  | -6.8496428  | -0.7832474 |
| Br | 0.2534846  | -11.0214184 | 0.8397915  |
| C  | 3.0943454  | -9.9386835  | -0.2680506 |
| N  | 3.3181304  | -10.8444077 | -1.2656878 |
| N  | 4.2836403  | -9.8430906  | 0.3964334  |
| C  | 4.6299334  | -11.3029477 | -1.2293062 |
| C  | 2.3256329  | -11.2478622 | -2.2556134 |
| C  | 5.2366931  | -10.6763441 | -0.1763939 |
| Cl | 5.2764302  | -12.4323505 | -2.3272644 |
| Cl | 6.8309390  | -10.8312995 | 0.4007499  |
| C  | 4.5203792  | -8.9939531  | 1.5574128  |
| H  | 5.4714690  | -8.4620759  | 1.4386701  |
| H  | 4.5458366  | -9.5967103  | 2.4751357  |
| H  | 3.7021697  | -8.2678997  | 1.5996220  |
| H  | 2.4571378  | -12.3105345 | -2.4883795 |
| H  | 2.4359750  | -10.6538513 | -3.1726703 |
| H  | 1.3371931  | -11.0921476 | -1.8110488 |

HEP complex  $R_1=CH_3$   $R_2=I$

51

|          |                  |            |            |
|----------|------------------|------------|------------|
| Energy = | -6792.5488970260 |            |            |
| H        | -2.6273413       | -5.5092399 | 3.0266570  |
| C        | -2.8981124       | -5.8192217 | 2.0179389  |
| C        | -4.1072196       | -5.4167175 | 1.4491016  |
| H        | -4.7855457       | -4.7883663 | 2.0268057  |
| C        | -4.4641786       | -5.8054135 | 0.1468107  |
| H        | -5.4166758       | -5.4753069 | -0.2686423 |
| C        | -3.6245769       | -6.6054110 | -0.6294360 |
| H        | -3.9166651       | -6.8983349 | -1.6357155 |
| C        | -2.4082949       | -7.0069299 | -0.0665512 |
| C        | -2.0575019       | -6.6218328 | 1.2427392  |

|    |            |             |            |
|----|------------|-------------|------------|
| N  | -1.3450817 | -7.7785605  | -0.5354009 |
| N  | -0.8096391 | -7.1907743  | 1.5051089  |
| C  | -1.2335321 | -8.4043002  | -1.8721866 |
| C  | -1.2121557 | -7.3484012  | -2.9798384 |
| H  | -2.1621597 | -6.8020900  | -3.0563242 |
| H  | -0.4035883 | -6.6263206  | -2.8058147 |
| H  | -1.0315460 | -7.8406777  | -3.9455100 |
| C  | -2.2889552 | -9.4957228  | -2.0632118 |
| H  | -3.3110785 | -9.0928066  | -2.0547089 |
| H  | -2.1322953 | -9.9885711  | -3.0330013 |
| H  | -2.2018981 | -10.2526543 | -1.2719299 |
| C  | -0.0888772 | -6.9399743  | 2.7780844  |
| C  | 0.8627376  | -5.7486813  | 2.6302093  |
| H  | 1.6412988  | -5.9636486  | 1.8853281  |
| H  | 0.3242091  | -4.8472055  | 2.3062668  |
| H  | 1.3411074  | -5.5334199  | 3.5963925  |
| C  | 0.5970310  | -8.1891153  | 3.3223320  |
| H  | -0.8871727 | -6.6692537  | 3.4852540  |
| H  | 1.4272810  | -8.5031489  | 2.6735197  |
| H  | 0.9975242  | -7.9660868  | 4.3215231  |
| H  | -0.0968212 | -9.0356425  | 3.3972776  |
| C  | -0.3691613 | -7.8882029  | 0.4159041  |
| H  | -0.2409255 | -8.8816299  | -1.8379123 |
| Pd | 1.3637249  | -8.9139385  | 0.1069859  |
| Br | 2.4069927  | -6.8530915  | -0.8108316 |
| Br | 0.2583875  | -11.0216480 | 0.8492304  |
| C  | 3.0967408  | -9.9283729  | -0.2611595 |
| N  | 3.3321038  | -10.8263470 | -1.2625661 |
| N  | 4.2803207  | -9.8281202  | 0.4122396  |
| C  | 4.6480940  | -11.2779602 | -1.2222946 |
| C  | 2.3355270  | -11.2143783 | -2.2544137 |
| C  | 5.2458503  | -10.6510419 | -0.1591169 |
| I  | 5.4733910  | -12.6312584 | -2.5529934 |
| I  | 7.1829763  | -10.8439750 | 0.5417816  |
| C  | 4.4848831  | -8.9799282  | 1.5798168  |
| H  | 5.4185966  | -8.4156753  | 1.4691802  |
| H  | 4.5262391  | -9.5879719  | 2.4936571  |
| H  | 3.6433726  | -8.2807394  | 1.6250363  |
| H  | 2.4616602  | -12.2751809 | -2.4998988 |
| H  | 2.4462107  | -10.6100869 | -3.1648688 |
| H  | 1.3480192  | -11.0598621 | -1.8065742 |

HEP complex  $R_1=CH_3$   $R_2=COCH_3$

Energy = -6503.4658051510

|    |            |             |            |
|----|------------|-------------|------------|
| H  | -2.5768389 | -5.4768675  | 3.0427515  |
| C  | -2.8817314 | -5.8312404  | 2.0587013  |
| C  | -4.1355701 | -5.5044614  | 1.5407041  |
| H  | -4.8143866 | -4.8910287  | 2.1336376  |
| C  | -4.5362539 | -5.9481201  | 0.2689955  |
| H  | -5.5218536 | -5.6740583  | -0.1080196 |
| C  | -3.6981277 | -6.7313522  | -0.5254647 |
| H  | -4.0233383 | -7.0648348  | -1.5087146 |
| C  | -2.4394358 | -7.0617061  | -0.0112651 |
| C  | -2.0422776 | -6.6172268  | 1.2652583  |
| N  | -1.3662202 | -7.8011722  | -0.5084574 |
| N  | -0.7557717 | -7.1158156  | 1.4785647  |
| C  | -1.3015276 | -8.4738056  | -1.8243803 |
| C  | -1.3385073 | -7.4574031  | -2.9681392 |
| H  | -2.2951897 | -6.9196237  | -3.0172011 |
| H  | -0.5293547 | -6.7235494  | -2.8553858 |
| H  | -1.2003046 | -7.9794731  | -3.9253054 |
| C  | -2.3487307 | -9.5845559  | -1.9354369 |
| H  | -3.3757923 | -9.1958451  | -1.9087793 |
| H  | -2.2177054 | -10.1144558 | -2.8892367 |
| H  | -2.2248053 | -10.3084852 | -1.1190889 |
| C  | 0.0132872  | -6.7881133  | 2.7050751  |
| C  | 0.8992225  | -5.5609579  | 2.4706736  |
| H  | 1.6535383  | -5.7676495  | 1.6991790  |
| H  | 0.3027952  | -4.6984284  | 2.1420054  |
| H  | 1.4098121  | -5.2874931  | 3.4049482  |
| C  | 0.7829061  | -7.9867960  | 3.2492777  |
| H  | -0.7611240 | -6.5306680  | 3.4427911  |
| H  | 1.5809450  | -8.2898293  | 2.5577782  |
| H  | 1.2372581  | -7.7108990  | 4.2113587  |
| H  | 0.1295920  | -8.8554696  | 3.3996202  |
| C  | -0.3355812 | -7.8291783  | 0.3915810  |
| H  | -0.3060823 | -8.9445742  | -1.8103542 |
| Pd | 1.4275509  | -8.7990770  | 0.0212722  |
| Br | 2.4069307  | -6.7439075  | -0.9629210 |
| Br | 0.4756199  | -10.9538474 | 0.8339555  |
| C  | 3.1288845  | -9.8246846  | -0.3905717 |
| N  | 3.3653854  | -10.5881022 | -1.4945777 |
| N  | 4.2239988  | -9.9948575  | 0.4001798  |
| C  | 4.5810736  | -11.2590267 | -1.3921883 |
| C  | 2.4800556  | -10.5516340 | -2.6562510 |
| C  | 5.1354501  | -10.8754848 | -0.1756302 |
| C  | 4.3129997  | -9.3871394  | 1.7314310  |
| H  | 5.3636003  | -9.2441521  | 1.9910383  |
| H  | 3.8158056  | -10.0328124 | 2.4676372  |

|   |           |             |            |
|---|-----------|-------------|------------|
| H | 3.7957082 | -8.4234461  | 1.6819121  |
| H | 3.0714795 | -10.5018264 | -3.5773397 |
| H | 1.8752735 | -9.6429770  | -2.5679538 |
| H | 1.8195566 | -11.4277701 | -2.6728376 |
| C | 6.4264748 | -11.2484295 | 0.4794625  |
| C | 5.1498037 | -12.1826096 | -2.4057491 |
| O | 6.3649750 | -12.2522990 | -2.5553892 |
| C | 4.2187721 | -13.0782799 | -3.2032017 |
| O | 7.0033970 | -10.4253752 | 1.1828274  |
| C | 6.9821822 | -12.6434391 | 0.3082530  |
| H | 6.2067022 | -13.3912849 | 0.1031751  |
| H | 7.5265564 | -12.9003076 | 1.2253323  |
| H | 7.6900808 | -12.6518170 | -0.5310489 |
| H | 3.2874097 | -13.3119294 | -2.6720467 |
| H | 4.7625164 | -14.0014354 | -3.4372406 |
| H | 3.9591710 | -12.5993903 | -4.1594415 |

HEP complex  $R_1=CH_3$   $R_2=COOCH_3$

63

|          |                  |             |            |
|----------|------------------|-------------|------------|
| Energy = | -6654.0127941410 |             |            |
| H        | -2.5937034       | -5.5422831  | 3.0861995  |
| C        | -2.8922328       | -5.8790068  | 2.0939987  |
| C        | -4.1433913       | -5.5449402  | 1.5739059  |
| H        | -4.8266047       | -4.9430139  | 2.1734693  |
| C        | -4.5360716       | -5.9678117  | 0.2926126  |
| H        | -5.5202385       | -5.6894475  | -0.0851466 |
| C        | -3.6920108       | -6.7364245  | -0.5100918 |
| H        | -4.0111753       | -7.0561151  | -1.4999405 |
| C        | -2.4355377       | -7.0724465  | 0.0053232  |
| C        | -2.0471853       | -6.6501712  | 1.2923751  |
| N        | -1.3586344       | -7.8013318  | -0.4982065 |
| N        | -0.7621214       | -7.1524769  | 1.5053121  |
| C        | -1.2777771       | -8.4444194  | -1.8281786 |
| C        | -1.3262347       | -7.4047557  | -2.9502874 |
| H        | -2.2923748       | -6.8839547  | -2.9969279 |
| H        | -0.5314514       | -6.6591415  | -2.8156137 |
| H        | -1.1697848       | -7.9046403  | -3.9164389 |
| C        | -2.3061087       | -9.5692074  | -1.9678107 |
| H        | -3.3396542       | -9.1982893  | -1.9307422 |
| H        | -2.1665357       | -10.0716317 | -2.9353912 |
| H        | -2.1693993       | -10.3119654 | -1.1704944 |
| C        | 0.0020814        | -6.8447790  | 2.7395319  |
| C        | 0.8862556        | -5.6116875  | 2.5305815  |

|    |            |             |            |
|----|------------|-------------|------------|
| H  | 1.6474318  | -5.8046037  | 1.7622133  |
| H  | 0.2905049  | -4.7457978  | 2.2095788  |
| H  | 1.3880389  | -5.3512271  | 3.4733888  |
| C  | 0.7741337  | -8.0503714  | 3.2650459  |
| H  | -0.7751553 | -6.6022548  | 3.4793816  |
| H  | 1.5743676  | -8.3415672  | 2.5706002  |
| H  | 1.2252981  | -7.7876515  | 4.2323967  |
| H  | 0.1226387  | -8.9227674  | 3.4007341  |
| C  | -0.3351546 | -7.8469112  | 0.4088705  |
| H  | -0.2732076 | -8.8963165  | -1.8208013 |
| Pd | 1.4271115  | -8.8070377  | 0.0263244  |
| Br | 2.3992958  | -6.7277807  | -0.9170656 |
| Br | 0.4744364  | -10.9761019 | 0.7958012  |
| C  | 3.1405278  | -9.7898199  | -0.4269083 |
| N  | 3.3674695  | -10.5383222 | -1.5450577 |
| N  | 4.2838008  | -9.8818689  | 0.3025830  |
| C  | 4.6346531  | -11.1054227 | -1.5159777 |
| C  | 2.3808787  | -10.6160198 | -2.6234936 |
| C  | 5.2185102  | -10.6911888 | -0.3329044 |
| C  | 4.4288959  | -9.2536075  | 1.6174668  |
| H  | 5.4889228  | -9.0718804  | 1.8112331  |
| H  | 4.0048708  | -9.9067909  | 2.3919551  |
| H  | 3.8764090  | -8.3086371  | 1.5904309  |
| H  | 2.8106138  | -11.1433048 | -3.4771774 |
| H  | 2.0962801  | -9.5960622  | -2.9073355 |
| H  | 1.4987659  | -11.1574260 | -2.2587095 |
| C  | 6.5552526  | -10.9870433 | 0.2265472  |
| C  | 5.2562997  | -11.9064525 | -2.6013296 |
| O  | 6.4011586  | -11.7708324 | -2.9825995 |
| O  | 4.3843423  | -12.8148994 | -3.1138334 |
| O  | 7.1954511  | -10.2272348 | 0.9341638  |
| O  | 6.9715134  | -12.2201731 | -0.1363087 |
| C  | 8.3214351  | -12.5536719 | 0.2645132  |
| H  | 8.5004169  | -13.5553445 | -0.1367755 |
| H  | 8.4062359  | -12.5503763 | 1.3585453  |
| H  | 9.0323334  | -11.8326309 | -0.1581225 |
| C  | 4.9203721  | -13.6329701 | -4.1824842 |
| H  | 4.0944622  | -14.2793748 | -4.4933816 |
| H  | 5.7631767  | -14.2303639 | -3.8131126 |
| H  | 5.2624724  | -13.0038307 | -5.0141247 |

HEP complex  $R_1=CH_3$   $R_2=OCH_3$

59

Energy = -6427.1842876040

|    |            |             |            |
|----|------------|-------------|------------|
| H  | -2.4749782 | -5.4594771  | 3.0472620  |
| C  | -2.7899982 | -5.7696341  | 2.0515004  |
| C  | -4.0085388 | -5.3400406  | 1.5233590  |
| H  | -4.6496007 | -4.6902048  | 2.1197011  |
| C  | -4.4217887 | -5.7283109  | 0.2377139  |
| H  | -5.3795650 | -5.3762673  | -0.1464463 |
| C  | -3.6313089 | -6.5561568  | -0.5612088 |
| H  | -3.9660474 | -6.8483262  | -1.5544404 |
| C  | -2.4073974 | -6.9872961  | -0.0381688 |
| C  | -1.9987727 | -6.5997331  | 1.2538562  |
| N  | -1.3845965 | -7.7952950  | -0.5346626 |
| N  | -0.7584214 | -7.1995156  | 1.4764372  |
| C  | -1.3414849 | -8.4468012  | -1.8626388 |
| C  | -1.3205902 | -7.4109751  | -2.9890930 |
| H  | -2.2514272 | -6.8294697  | -3.0408909 |
| H  | -0.4793595 | -6.7179282  | -2.8558339 |
| H  | -1.1937597 | -7.9247337  | -3.9522456 |
| C  | -2.4417278 | -9.5016920  | -1.9985151 |
| H  | -3.4479078 | -9.0609868  | -1.9730740 |
| H  | -2.3296782 | -10.0241550 | -2.9588798 |
| H  | -2.3604417 | -10.2418545 | -1.1910444 |
| C  | 0.0195285  | -6.9441023  | 2.7138859  |
| C  | 0.9755310  | -5.7647978  | 2.5061367  |
| H  | 1.7091985  | -5.9972381  | 1.7218362  |
| H  | 0.4301460  | -4.8597706  | 2.2038628  |
| H  | 1.5086107  | -5.5470413  | 3.4426585  |
| C  | 0.7189928  | -8.1917656  | 3.2438369  |
| H  | -0.7435799 | -6.6568730  | 3.4527729  |
| H  | 1.5371642  | -8.5039975  | 2.5795274  |
| H  | 1.1388962  | -7.9655552  | 4.2345950  |
| H  | 0.0289522  | -9.0400361  | 3.3339327  |
| C  | -0.3766096 | -7.9233106  | 0.3815562  |
| H  | -0.3664371 | -8.9601637  | -1.8523455 |
| Pd | 1.3190689  | -9.0025418  | 0.0322508  |
| Br | 2.3898648  | -6.9951481  | -0.9753951 |
| Br | 0.1828018  | -11.0647150 | 0.8637292  |
| C  | 3.0116228  | -10.0669959 | -0.3629855 |
| N  | 3.1949707  | -11.0109009 | -1.3201937 |
| N  | 4.2247355  | -9.9609052  | 0.2591779  |
| C  | 4.5168166  | -11.4903033 | -1.3175275 |
| C  | 2.1632770  | -11.4858309 | -2.2326113 |
| C  | 5.1553330  | -10.8262714 | -0.3005701 |
| C  | 4.5219416  | -9.0738853  | 1.3763513  |
| H  | 5.5162880  | -8.6330264  | 1.2413713  |
| H  | 4.4941468  | -9.6246455  | 2.3267729  |
| H  | 3.7684235  | -8.2791213  | 1.3743495  |



|   |           |             |            |
|---|-----------|-------------|------------|
| H | 2.4307420 | -12.4941281 | -2.5692525 |
| H | 2.0730314 | -10.8181228 | -3.1011343 |
| H | 1.2128911 | -11.5203576 | -1.6867581 |
| O | 4.9409513 | -12.4704638 | -2.1564477 |
| O | 6.4013769 | -10.8466281 | 0.2204977  |
| C | 7.2136068 | -11.9863561 | -0.1116015 |
| H | 6.6897962 | -12.9213642 | 0.1340724  |
| H | 8.1189297 | -11.8881820 | 0.4963050  |
| H | 7.4821403 | -11.9851995 | -1.1781587 |
| C | 5.3784713 | -12.0061654 | -3.4562301 |
| H | 4.5589841 | -11.5065037 | -3.9941986 |
| H | 5.6927803 | -12.8997067 | -4.0075426 |
| H | 6.2241048 | -11.3086663 | -3.3528738 |

HEP complex  $R_1=C(CH_3)_3$   $R_2=H$

69

|          |                  |             |            |
|----------|------------------|-------------|------------|
| Energy = | -6433.9927073880 |             |            |
| H        | -2.7183305       | -5.3449096  | 2.9724543  |
| C        | -2.9852350       | -5.7320501  | 1.9897118  |
| C        | -4.2376222       | -5.4598221  | 1.4384952  |
| H        | -4.9486239       | -4.8560356  | 2.0029676  |
| C        | -4.5966265       | -5.9486138  | 0.1713832  |
| H        | -5.5832126       | -5.7194448  | -0.2322818 |
| C        | -3.7153313       | -6.7223518  | -0.5842436 |
| H        | -4.0085443       | -7.0923412  | -1.5642861 |
| C        | -2.4578764       | -6.9980587  | -0.0354963 |
| C        | -2.1019052       | -6.5105631  | 1.2364076  |
| N        | -1.3544743       | -7.7174610  | -0.4907309 |
| N        | -0.8047196       | -6.9631451  | 1.4894018  |
| C        | -1.2514080       | -8.4039266  | -1.7962864 |
| C        | -1.2988313       | -7.4009002  | -2.9517152 |
| H        | -2.2633993       | -6.8788163  | -3.0136591 |
| H        | -0.5013428       | -6.6537949  | -2.8407646 |
| H        | -1.1445378       | -7.9318574  | -3.9013802 |
| C        | -2.2662850       | -9.5439238  | -1.9093905 |
| H        | -3.3040232       | -9.1836052  | -1.9081404 |
| H        | -2.1026147       | -10.0839436 | -2.8522643 |
| H        | -2.1405526       | -10.2520978 | -1.0791539 |
| C        | -0.0882244       | -6.5900017  | 2.7356969  |
| C        | 1.0005822        | -5.5514022  | 2.4535332  |
| H        | 1.7518817        | -5.9356873  | 1.7524995  |
| H        | 0.5671047        | -4.6449019  | 2.0090294  |
| H        | 1.4955733        | -5.2712538  | 3.3944072  |

|    |            |             |            |
|----|------------|-------------|------------|
| C  | 0.3903939  | -7.8105208  | 3.5183124  |
| H  | -0.8633488 | -6.1045999  | 3.3447089  |
| H  | 1.1397695  | -8.3855933  | 2.9627759  |
| H  | 0.8332869  | -7.4751666  | 4.4670355  |
| H  | -0.4434491 | -8.4891208  | 3.7400256  |
| C  | -0.3416439 | -7.7017832  | 0.4326348  |
| H  | -0.2432714 | -8.8434979  | -1.7666940 |
| Pd | 1.4156436  | -8.7009885  | 0.0992102  |
| Br | 2.3132712  | -6.6166562  | -0.9674346 |
| Br | 0.3475579  | -10.6893445 | 1.1788378  |
| C  | 3.1657436  | -9.7632702  | -0.3428920 |
| N  | 3.4587601  | -10.4903070 | -1.4806026 |
| N  | 4.2962582  | -9.8840215  | 0.4367494  |
| C  | 4.7275446  | -11.0420331 | -1.3907928 |
| C  | 2.5858529  | -10.7123040 | -2.6977540 |
| C  | 5.2466659  | -10.6685544 | -0.1981367 |
| C  | 4.5122061  | -9.4035900  | 1.8531759  |
| C  | 6.0193195  | -9.3920675  | 2.1649670  |
| C  | 3.7973498  | -10.3799448 | 2.8011323  |
| C  | 3.9903577  | -7.9776290  | 2.0178226  |
| C  | 3.3226402  | -11.6068044 | -3.7095976 |
| C  | 2.2980729  | -9.3668460  | -3.3734306 |
| C  | 1.3004597  | -11.4337831 | -2.2759158 |
| H  | 0.6588876  | -11.5800419 | -3.1566743 |
| H  | 0.7470154  | -10.8702539 | -1.5166905 |
| H  | 1.5293796  | -12.4190913 | -1.8461758 |
| H  | 2.6542456  | -11.7531592 | -4.5677971 |
| H  | 3.5536816  | -12.6003409 | -3.3003228 |
| H  | 4.2449372  | -11.1434961 | -4.0866987 |
| H  | 1.6474872  | -9.5288294  | -4.2445955 |
| H  | 3.2291255  | -8.8966010  | -3.7193207 |
| H  | 1.8146666  | -8.6613137  | -2.6880564 |
| H  | 4.5053292  | -7.2807093  | 1.3433931  |
| H  | 4.1485259  | -7.6559112  | 3.0565703  |
| H  | 2.9183487  | -7.9162382  | 1.7900264  |
| H  | 4.2190692  | -11.3909446 | 2.7034722  |
| H  | 2.7237860  | -10.4364507 | 2.5782605  |
| H  | 3.9306781  | -10.0528729 | 3.8424014  |
| H  | 6.5833556  | -8.8001644  | 1.4303725  |
| H  | 6.4501496  | -10.4010748 | 2.2249065  |
| H  | 6.1575311  | -8.9257977  | 3.1492658  |
| H  | 5.1723622  | -11.6439969 | -2.1681585 |
| H  | 6.2109061  | -10.8971561 | 0.2295097  |

HEP complex  $R_1=C(CH_3)_3$   $R_2=NO_2$

73

|          |                  |             |            |
|----------|------------------|-------------|------------|
| Energy = | -6843.1907857360 |             |            |
| H        | -2.6393139       | -5.4207243  | 3.0024043  |
| C        | -2.9184327       | -5.8062507  | 2.0226230  |
| C        | -4.1900924       | -5.5635708  | 1.5040162  |
| H        | -4.9038469       | -4.9857599  | 2.0916450  |
| C        | -4.5651709       | -6.0471137  | 0.2392191  |
| H        | -5.5661447       | -5.8390918  | -0.1391752 |
| C        | -3.6824704       | -6.7887117  | -0.5454627 |
| H        | -3.9873163       | -7.1515412  | -1.5243923 |
| C        | -2.4069799       | -7.0397535  | -0.0267235 |
| C        | -2.0335838       | -6.5537269  | 1.2397344  |
| N        | -1.2979392       | -7.7298762  | -0.5144879 |
| N        | -0.7182169       | -6.9720823  | 1.4585807  |
| C        | -1.2222251       | -8.4215164  | -1.8202928 |
| C        | -1.2921729       | -7.4221205  | -2.9774655 |
| H        | -2.2579766       | -6.9005186  | -3.0196940 |
| H        | -0.4935200       | -6.6737284  | -2.8849513 |
| H        | -1.1585281       | -7.9556739  | -3.9287355 |
| C        | -2.2389970       | -9.5621826  | -1.9084964 |
| H        | -3.2771296       | -9.2045105  | -1.8999540 |
| H        | -2.0841592       | -10.1114499 | -2.8473386 |
| H        | -2.1023865       | -10.2624833 | -1.0736189 |
| C        | 0.0092594        | -6.5838042  | 2.6948002  |
| C        | 1.0304981        | -5.4794160  | 2.4124749  |
| H        | 1.8095479        | -5.8163737  | 1.7173108  |
| H        | 0.5427758        | -4.6037013  | 1.9626964  |
| H        | 1.5004380        | -5.1651080  | 3.3552982  |
| C        | 0.5745783        | -7.7895378  | 3.4397946  |
| H        | -0.7774952       | -6.1561331  | 3.3312961  |
| H        | 1.3377124        | -8.3085106  | 2.8497565  |
| H        | 1.0275810        | -7.4485370  | 4.3814350  |
| H        | -0.2129505       | -8.5180313  | 3.6718395  |
| C        | -0.2649004       | -7.6873489  | 0.3830877  |
| H        | -0.2174618       | -8.8676806  | -1.8081459 |
| Pd       | 1.5067067        | -8.6261658  | 0.0178491  |
| Br       | 2.2939296        | -6.4704027  | -1.0091792 |
| Br       | 0.4897659        | -10.6679329 | 1.0248901  |
| C        | 3.2025149        | -9.8383321  | -0.3469679 |
| N        | 3.2728483        | -10.8221907 | -1.3083809 |
| N        | 4.2422466        | -10.1076046 | 0.5465027  |
| C        | 4.2613044        | -11.7388503 | -0.9644526 |
| C        | 2.6008109        | -10.7867640 | -2.6963405 |
| C        | 4.8765479        | -11.2635703 | 0.1588869  |

|   |           |             |            |
|---|-----------|-------------|------------|
| C | 4.5729800 | -9.3499051  | 1.8376064  |
| C | 6.0956923 | -9.3350432  | 2.0752612  |
| C | 3.8435634 | -10.0600969 | 2.9881181  |
| C | 4.1285037 | -7.8962887  | 1.7113010  |
| C | 3.5374270 | -11.4319107 | -3.7380222 |
| C | 2.4241112 | -9.3283681  | -3.1222303 |
| C | 1.2530301 | -11.5140321 | -2.6285801 |
| H | 0.7534267 | -11.4235704 | -3.6034971 |
| H | 0.6117645 | -11.0766675 | -1.8528090 |
| H | 1.3867148 | -12.5769931 | -2.4008524 |
| H | 3.1490606 | -11.1703386 | -4.7307685 |
| H | 3.5696555 | -12.5228281 | -3.6837239 |
| H | 4.5563875 | -11.0251352 | -3.6710427 |
| H | 1.9720022 | -9.3235578  | -4.1233227 |
| H | 3.3862670 | -8.8017651  | -3.1735459 |
| H | 1.7810301 | -8.7565255  | -2.4476422 |
| H | 4.6100791 | -7.3899129  | 0.8650947  |
| H | 4.4052290 | -7.3773867  | 2.6388458  |
| H | 3.0443994 | -7.7991719  | 1.5740426  |
| H | 4.2099915 | -11.0867423 | 3.1195364  |
| H | 2.7629766 | -10.1034849 | 2.7989274  |
| H | 4.0222248 | -9.5089229  | 3.9217063  |
| H | 6.6494200 | -9.0452971  | 1.1724767  |
| H | 6.4928369 | -10.2796038 | 2.4596997  |
| H | 6.2963733 | -8.5791731  | 2.8447468  |
| N | 4.4231603 | -13.1055478 | -1.4160047 |
| N | 5.9861299 | -11.9417217 | 0.8555964  |
| O | 3.4209376 | -13.7119095 | -1.8058195 |
| O | 5.5569901 | -13.5859546 | -1.3110542 |
| O | 5.6776282 | -12.6892987 | 1.7823343  |
| O | 7.1157618 | -11.7023926 | 0.4460862  |

HEP complex  $R_1=C(CH_3)_3$   $R_2=CH_3$

75

|          |                  |            |            |
|----------|------------------|------------|------------|
| Energy = | -6512.6346281130 |            |            |
| H        | -2.5248841       | -5.3051085 | 2.9266615  |
| C        | -2.8440486       | -5.7537211 | 1.9867058  |
| C        | -4.1276067       | -5.5207295 | 1.4923278  |
| H        | -4.8108659       | -4.8889037 | 2.0603742  |
| C        | -4.5511969       | -6.0802732 | 0.2754747  |
| H        | -5.5586312       | -5.8752004 | -0.0875544 |
| C        | -3.7068087       | -6.8916858 | -0.4827910 |
| H        | -4.0482115       | -7.3122187 | -1.4260240 |
| C        | -2.4198144       | -7.1323779 | 0.0116270  |

|    |            |             |            |
|----|------------|-------------|------------|
| C  | -1.9967833 | -6.5674192  | 1.2290601  |
| N  | -1.3371435 | -7.8687734  | -0.4650893 |
| N  | -0.6796162 | -6.9867913  | 1.4276629  |
| C  | -1.3297780 | -8.6741498  | -1.7041343 |
| C  | -1.4127798 | -7.7803354  | -2.9435984 |
| H  | -2.3689979 | -7.2425502  | -3.0052317 |
| H  | -0.5971961 | -7.0438617  | -2.9365047 |
| H  | -1.3160878 | -8.3971933  | -3.8478529 |
| C  | -2.3792986 | -9.7879285  | -1.6542488 |
| H  | -3.4073279 | -9.4023020  | -1.6372258 |
| H  | -2.2752738 | -10.4201655 | -2.5467516 |
| H  | -2.2238262 | -10.4174617 | -0.7680554 |
| C  | 0.0738062  | -6.5856880  | 2.6431955  |
| C  | 1.1413520  | -5.5367394  | 2.3240690  |
| H  | 1.8743936  | -5.9102997  | 1.5994708  |
| H  | 0.6830324  | -4.6365131  | 1.8920666  |
| H  | 1.6607137  | -5.2495076  | 3.2496441  |
| C  | 0.5809023  | -7.7983063  | 3.4214064  |
| H  | -0.6881635 | -6.1026168  | 3.2706048  |
| H  | 1.2881697  | -8.3934287  | 2.8327154  |
| H  | 1.0802352  | -7.4566159  | 4.3391394  |
| H  | -0.2498823 | -8.4601874  | 3.7000462  |
| C  | -0.2634287 | -7.7715930  | 0.3824014  |
| H  | -0.3407119 | -9.1518366  | -1.6829338 |
| Pd | 1.5258739  | -8.6751318  | -0.0132305 |
| Br | 2.2362600  | -6.5253426  | -1.1262698 |
| Br | 0.5998772  | -10.7586189 | 1.0136434  |
| C  | 3.2844276  | -9.8183229  | -0.3871553 |
| N  | 3.4112173  | -10.7935630 | -1.3528367 |
| N  | 4.2436853  | -10.1263767 | 0.5523621  |
| C  | 4.3336739  | -11.7689041 | -0.9467927 |
| C  | 2.7049972  | -10.8275767 | -2.6931721 |
| C  | 4.8626724  | -11.3459431 | 0.2409431  |
| C  | 4.6405300  | -13.0688169 | -1.6209669 |
| C  | 5.8887979  | -12.0846183 | 1.0412394  |
| C  | 4.6095930  | -9.3062214  | 1.7688017  |
| C  | 6.1451205  | -9.1731928  | 1.8682777  |
| C  | 4.0118706  | -9.9713349  | 3.0215852  |
| C  | 4.0739746  | -7.8814372  | 1.6474955  |
| C  | 3.6927162  | -11.2579559 | -3.8023360 |
| C  | 2.2320422  | -9.4277969  | -3.0841145 |
| C  | 1.5074553  | -11.7878564 | -2.6108492 |
| H  | 0.9801581  | -11.8028608 | -3.5757396 |
| H  | 0.8132616  | -11.4668481 | -1.8225315 |
| H  | 1.8175714  | -12.8163281 | -2.3810000 |
| H  | 3.2429189  | -11.0071059 | -4.7720368 |

|   |           |             |            |
|---|-----------|-------------|------------|
| H | 3.9060507 | -12.3297696 | -3.8161619 |
| H | 4.6388488 | -10.7050775 | -3.7222149 |
| H | 1.7803569 | -9.4829132  | -4.0845247 |
| H | 3.0588175 | -8.7065233  | -3.1083986 |
| H | 1.4850655 | -9.0316015  | -2.3880100 |
| H | 4.4524145 | -7.3728986  | 0.7518072  |
| H | 4.3889376 | -7.3182477  | 2.5370555  |
| H | 2.9778065 | -7.8548261  | 1.5933470  |
| H | 4.4357808 | -10.9658614 | 3.2124127  |
| H | 2.9259678 | -10.0876059 | 2.9076312  |
| H | 4.2141739 | -9.3468619  | 3.9029442  |
| H | 6.5682454 | -8.8472129  | 0.9077988  |
| H | 6.6522298 | -10.0876219 | 2.1869922  |
| H | 6.3742856 | -8.3993408  | 2.6127800  |
| H | 3.7480331 | -13.5349818 | -2.0540365 |
| H | 5.0352445 | -13.7713949 | -0.8763280 |
| H | 5.3970945 | -12.9828032 | -2.4146623 |
| H | 5.8622966 | -13.1454857 | 0.7622822  |
| H | 5.7070009 | -12.0355418 | 2.1206736  |
| H | 6.9136625 | -11.7308935 | 0.8545082  |

HEP complex  $R_1=C(CH_3)_3$   $R_2=OH$

71

|          |                  |             |            |
|----------|------------------|-------------|------------|
| Energy = | -6584.4951749000 |             |            |
| H        | -2.4558865       | -5.0784193  | 2.8612343  |
| C        | -2.7872670       | -5.5234051  | 1.9237190  |
| C        | -4.0552648       | -5.2386877  | 1.4166116  |
| H        | -4.7137335       | -4.5706628  | 1.9724293  |
| C        | -4.4943261       | -5.7919019  | 0.2022169  |
| H        | -5.4890849       | -5.5465399  | -0.1705715 |
| C        | -3.6806589       | -6.6467874  | -0.5414614 |
| H        | -4.0333168       | -7.0620094  | -1.4828924 |
| C        | -2.4089696       | -6.9382443  | -0.0345719 |
| C        | -1.9706867       | -6.3810167  | 1.1804559  |
| N        | -1.3558943       | -7.7257478  | -0.4962701 |
| N        | -0.6751440       | -6.8564548  | 1.3936921  |
| C        | -1.3901025       | -8.5618510  | -1.7142351 |
| C        | -1.4327929       | -7.7002462  | -2.9779497 |
| H        | -2.3672360       | -7.1277979  | -3.0589117 |
| H        | -0.5907266       | -6.9947388  | -2.9896387 |
| H        | -1.3577988       | -8.3453486  | -3.8643626 |
| C        | -2.4909607       | -9.6233044  | -1.6347605 |
| H        | -3.5002208       | -9.1911753  | -1.6311658 |
| H        | -2.4138591       | -10.2844169 | -2.5089419 |

|    |            |             |            |
|----|------------|-------------|------------|
| H  | -2.3642703 | -10.2350045 | -0.7319316 |
| C  | 0.0618107  | -6.5220376  | 2.6393361  |
| C  | 1.2064079  | -5.5407044  | 2.3808614  |
| H  | 1.9365742  | -5.9423519  | 1.6687682  |
| H  | 0.8220064  | -4.6014971  | 1.9597945  |
| H  | 1.7127585  | -5.3111849  | 3.3296085  |
| C  | 0.4500428  | -7.7818877  | 3.4128447  |
| H  | -0.6883495 | -5.9979665  | 3.2476504  |
| H  | 1.1333538  | -8.4194010  | 2.8409307  |
| H  | 0.9364107  | -7.4936553  | 4.3556031  |
| H  | -0.4381404 | -8.3836777  | 3.6481354  |
| C  | -0.2825143 | -7.6655123  | 0.3567968  |
| H  | -0.4274303 | -9.0882184  | -1.6785072 |
| Pd | 1.4939866  | -8.6155740  | -0.0229254 |
| Br | 2.3506045  | -6.4868530  | -1.0381994 |
| Br | 0.5020643  | -10.7172892 | 0.8941631  |
| C  | 3.2371846  | -9.7644128  | -0.3860041 |
| N  | 3.3997786  | -10.6861313 | -1.4137728 |
| N  | 4.1630928  | -10.1223421 | 0.5668160  |
| C  | 4.3248198  | -11.6447055 | -1.0375583 |
| C  | 2.7552175  | -10.7164885 | -2.7842871 |
| C  | 4.8201610  | -11.2955811 | 0.1746514  |
| C  | 4.5001857  | -9.4365431  | 1.8673821  |
| C  | 6.0361962  | -9.3313412  | 2.0035513  |
| C  | 3.8981326  | -10.2611345 | 3.0172441  |
| C  | 3.9601424  | -8.0111934  | 1.8793129  |
| C  | 3.8538656  | -10.9206818 | -3.8499966 |
| C  | 2.0852801  | -9.3847627  | -3.0969908 |
| C  | 1.7276632  | -11.8597698 | -2.8050486 |
| H  | 1.2200350  | -11.8799260 | -3.7798180 |
| H  | 0.9784680  | -11.7129527 | -2.0153326 |
| H  | 2.2079067  | -12.8345750 | -2.6500877 |
| H  | 3.3876000  | -10.8349868 | -4.8409149 |
| H  | 4.3413271  | -11.8976073 | -3.7874654 |
| H  | 4.6170532  | -10.1332788 | -3.7700393 |
| H  | 1.6679628  | -9.4449816  | -4.1119898 |
| H  | 2.7884968  | -8.5442408  | -3.0516534 |
| H  | 1.2716222  | -9.1621611  | -2.3980756 |
| H  | 4.3822399  | -7.4036551  | 1.0684031  |
| H  | 4.2160350  | -7.5518624  | 2.8443853  |
| H  | 2.8687553  | -7.9915445  | 1.7634754  |
| H  | 4.3228877  | -11.2730489 | 3.0443322  |
| H  | 2.8102369  | -10.3467176 | 2.8961586  |
| H  | 4.1137467  | -9.7705258  | 3.9771653  |
| H  | 6.4870769  | -8.9366923  | 1.0818887  |
| H  | 6.5094942  | -10.2832668 | 2.2728584  |

|   |           |             |            |
|---|-----------|-------------|------------|
| H | 6.2665470 | -8.6252958  | 2.8124080  |
| O | 4.6126298 | -12.7580735 | -1.7643602 |
| O | 5.6599389 | -12.0767007 | 0.9287320  |
| H | 5.1489884 | -13.3305925 | -1.1813566 |
| H | 6.5730762 | -11.7367846 | 0.8711816  |

HEP complex  $R_1=C(CH_3)_3$   $R_2=SH$

71

|          |                  |             |            |
|----------|------------------|-------------|------------|
| Energy = | -7230.4804726210 |             |            |
| H        | -2.5540874       | -5.3678885  | 3.0272473  |
| C        | -2.8652583       | -5.7627606  | 2.0609775  |
| C        | -4.1524782       | -5.5216242  | 1.5804301  |
| H        | -4.8459167       | -4.9365893  | 2.1850426  |
| C        | -4.5678888       | -6.0148396  | 0.3322411  |
| H        | -5.5794058       | -5.8066619  | -0.0172617 |
| C        | -3.7108522       | -6.7654167  | -0.4728588 |
| H        | -4.0461009       | -7.1362585  | -1.4388044 |
| C        | -2.4201025       | -7.0142871  | 0.0075447  |
| C        | -2.0055323       | -6.5166975  | 1.2567440  |
| N        | -1.3275082       | -7.7070495  | -0.5105295 |
| N        | -0.6829408       | -6.9294030  | 1.4329123  |
| C        | -1.3061691       | -8.4329827  | -1.7980622 |
| C        | -1.4016844       | -7.4651698  | -2.9796177 |
| H        | -2.3674006       | -6.9421109  | -3.0119809 |
| H        | -0.5995149       | -6.7164243  | -2.9253563 |
| H        | -1.2917759       | -8.0238333  | -3.9194911 |
| C        | -2.3368038       | -9.5648945  | -1.8215041 |
| H        | -3.3712883       | -9.1977601  | -1.7899490 |
| H        | -2.2162001       | -10.1414698 | -2.7488932 |
| H        | -2.1772223       | -10.2427915 | -0.9724778 |
| C        | 0.0669060        | -6.5834828  | 2.6676127  |
| C        | 1.1438136        | -5.5311801  | 2.3971176  |
| H        | 1.8875542        | -5.8864136  | 1.6742839  |
| H        | 0.6969867        | -4.6160481  | 1.9850876  |
| H        | 1.6491160        | -5.2747650  | 3.3393333  |
| C        | 0.5611338        | -7.8305810  | 3.3984664  |
| H        | -0.6946481       | -6.1193750  | 3.3094217  |
| H        | 1.2675082        | -8.4051152  | 2.7885074  |
| H        | 1.0580685        | -7.5302181  | 4.3317752  |
| H        | -0.2752870       | -8.4979219  | 3.6451176  |
| C        | -0.2590326       | -7.6502835  | 0.3465100  |
| H        | -0.3088533       | -8.8933275  | -1.8024114 |
| Pd       | 1.5260205        | -8.5417615  | -0.0656212 |
| Br       | 2.2783094        | -6.3657838  | -1.0710630 |



|    |           |             |            |
|----|-----------|-------------|------------|
| Br | 0.5600428 | -10.6560787 | 0.8538658  |
| C  | 3.2608668 | -9.7344679  | -0.4359556 |
| N  | 3.3463284 | -10.7040456 | -1.4276091 |
| N  | 4.1125469 | -10.1516682 | 0.5506817  |
| C  | 4.1156499 | -11.7729199 | -0.9857444 |
| C  | 2.7545389 | -10.6317105 | -2.8227683 |
| C  | 4.6046869 | -11.4384586 | 0.2576991  |
| C  | 4.6006663 | -9.3320575  | 1.7268713  |
| C  | 6.1421881 | -9.2774937  | 1.6767536  |
| C  | 4.0883766 | -9.9563045  | 3.0361772  |
| C  | 4.1092506 | -7.8916600  | 1.6231038  |
| C  | 3.8545865 | -10.9630788 | -3.8528816 |
| C  | 2.2893408 | -9.2139539  | -3.1398692 |
| C  | 1.5739450 | -11.6119294 | -2.9098401 |
| H  | 1.1313966 | -11.5623346 | -3.9147561 |
| H  | 0.8089581 | -11.3534699 | -2.1653961 |
| H  | 1.8844015 | -12.6497224 | -2.7281678 |
| H  | 3.4438708 | -10.7935410 | -4.8573861 |
| H  | 4.2078562 | -11.9991042 | -3.8138976 |
| H  | 4.7181097 | -10.2962371 | -3.7215424 |
| H  | 1.9137078 | -9.2035223  | -4.1723521 |
| H  | 3.1008614 | -8.4810470  | -3.0529189 |
| H  | 1.4864802 | -8.8817363  | -2.4724176 |
| H  | 4.4227426 | -7.4097013  | 0.6891005  |
| H  | 4.5284332 | -7.3303644  | 2.4700096  |
| H  | 3.0151349 | -7.8232213  | 1.6747416  |
| H  | 4.5366226 | -10.9391621 | 3.2242517  |
| H  | 2.9965927 | -10.0687560 | 3.0036412  |
| H  | 4.3505736 | -9.2998241  | 3.8773937  |
| H  | 6.4784434 | -8.8672701  | 0.7144547  |
| H  | 6.6123196 | -10.2539735 | 1.8342157  |
| H  | 6.4930604 | -8.6058556  | 2.4721616  |
| S  | 4.3320783 | -13.3250503 | -1.7835800 |
| S  | 5.5662696 | -12.5114728 | 1.2565663  |
| H  | 5.0318340 | -13.7962783 | -0.7083240 |
| H  | 4.5461238 | -13.1092785 | 1.9338572  |

HEP complex  $R_1=C(CH_3)_3$   $R_2=C_6H_5$

89

|          |                  |            |           |
|----------|------------------|------------|-----------|
| Energy = | -6896.2529219860 |            |           |
| H        | -2.5168515       | -5.3032844 | 2.9175201 |
| C        | -2.8387321       | -5.7557056 | 1.9802749 |
| C        | -4.1192268       | -5.5147961 | 1.4818099 |
| H        | -4.7977048       | -4.8721979 | 2.0435504 |

|    |            |             |            |
|----|------------|-------------|------------|
| C  | -4.5456393 | -6.0797571  | 0.2684176  |
| H  | -5.5511031 | -5.8695979  | -0.0971730 |
| C  | -3.7063838 | -6.9021631  | -0.4837666 |
| H  | -4.0498881 | -7.3263496  | -1.4245867 |
| C  | -2.4216225 | -7.1487080  | 0.0134459  |
| C  | -1.9971911 | -6.5815177  | 1.2294793  |
| N  | -1.3418107 | -7.8929809  | -0.4585368 |
| N  | -0.6844097 | -7.0108257  | 1.4346999  |
| C  | -1.3300148 | -8.6920762  | -1.7019937 |
| C  | -1.4123208 | -7.7910762  | -2.9365038 |
| H  | -2.3694068 | -7.2547013  | -2.9967119 |
| H  | -0.5980887 | -7.0531938  | -2.9235210 |
| H  | -1.3126631 | -8.4025394  | -3.8441148 |
| C  | -2.3791308 | -9.8067309  | -1.6612779 |
| H  | -3.4073999 | -9.4214472  | -1.6470922 |
| H  | -2.2709080 | -10.4348331 | -2.5561529 |
| H  | -2.2278020 | -10.4405590 | -0.7774806 |
| C  | 0.0672532  | -6.6079184  | 2.6509889  |
| C  | 1.1181486  | -5.5407820  | 2.3362457  |
| H  | 1.8632722  | -5.9029207  | 1.6183222  |
| H  | 0.6469221  | -4.6500621  | 1.8984389  |
| H  | 1.6254429  | -5.2416291  | 3.2647659  |
| C  | 0.5945742  | -7.8169257  | 3.4209016  |
| H  | -0.7001325 | -6.1405934  | 3.2837809  |
| H  | 1.3102428  | -8.3979742  | 2.8288150  |
| H  | 1.0905724  | -7.4717697  | 4.3391398  |
| H  | -0.2251231 | -8.4929660  | 3.6980795  |
| C  | -0.2705680 | -7.7997923  | 0.3920699  |
| H  | -0.3399638 | -9.1689560  | -1.6825838 |
| Pd | 1.5182888  | -8.7021219  | -0.0028264 |
| Br | 2.2023787  | -6.5371963  | -1.1059187 |
| Br | 0.6064355  | -10.7901940 | 1.0296580  |
| C  | 3.2807435  | -9.8336947  | -0.3795693 |
| N  | 3.4332526  | -10.7844853 | -1.3661798 |
| N  | 4.2520548  | -10.1221151 | 0.5535406  |
| C  | 4.4128959  | -11.7192457 | -0.9927993 |
| C  | 2.7068323  | -10.8122450 | -2.7031563 |
| C  | 4.9277088  | -11.3029852 | 0.2052908  |
| C  | 4.7538839  | -13.0123294 | -1.6375880 |
| C  | 5.9062025  | -12.0907556 | 0.9991980  |
| C  | 4.6029218  | -9.2937375  | 1.7761863  |
| C  | 6.1339041  | -9.1752471  | 1.9062186  |
| C  | 3.9966193  | -9.9524711  | 3.0269905  |
| C  | 4.0748970  | -7.8690941  | 1.6312726  |
| C  | 3.6559699  | -11.2942944 | -3.8179480 |
| C  | 2.2751952  | -9.3994024  | -3.0954580 |

|   |           |             |            |
|---|-----------|-------------|------------|
| C | 1.4839661 | -11.7372943 | -2.6024258 |
| H | 0.9072942 | -11.6801649 | -3.5369247 |
| H | 0.8405194 | -11.4418579 | -1.7629003 |
| H | 1.7823168 | -12.7834358 | -2.4562332 |
| H | 3.1570897 | -11.1129885 | -4.7797768 |
| H | 3.8891065 | -12.3604971 | -3.7645207 |
| H | 4.5943732 | -10.7230109 | -3.8159531 |
| H | 1.8412199 | -9.4399392  | -4.1042789 |
| H | 3.1199586 | -8.6989826  | -3.1034541 |
| H | 1.5249974 | -8.9859204  | -2.4138841 |
| H | 4.4493278 | -7.3790105  | 0.7238488  |
| H | 4.4018439 | -7.2923075  | 2.5078993  |
| H | 2.9788170 | -7.8339517  | 1.5888168  |
| H | 4.4787781 | -10.9119858 | 3.2506636  |
| H | 2.9208504 | -10.1261242 | 2.8900121  |
| H | 4.1425269 | -9.2928159  | 3.8937460  |
| H | 6.5782468 | -8.8035901  | 0.9720522  |
| H | 6.6213487 | -10.1134545 | 2.1839065  |
| H | 6.3508360 | -8.4421324  | 2.6947168  |
| C | 3.9047231 | -14.1213032 | -1.4832940 |
| C | 5.9698501 | -13.1877262 | -2.3185428 |
| C | 4.2477182 | -15.3619043 | -2.0255605 |
| H | 2.9786123 | -14.0099613 | -0.9180060 |
| C | 5.4505397 | -15.5182060 | -2.7184657 |
| H | 3.5760960 | -16.2118877 | -1.8955470 |
| C | 6.3145483 | -14.4285790 | -2.8563540 |
| H | 5.7182433 | -16.4875060 | -3.1412873 |
| H | 7.2613104 | -14.5442218 | -3.3862670 |
| H | 6.6408422 | -12.3362163 | -2.4388278 |
| C | 5.4593611 | -12.9538378 | 2.0134634  |
| C | 7.2740775 | -12.0864930 | 0.6779181  |
| C | 6.3598514 | -13.7653494 | 2.7075666  |
| C | 8.1739156 | -12.8985467 | 1.3694603  |
| C | 7.7199300 | -13.7366262 | 2.3914132  |
| H | 4.3943132 | -13.0000467 | 2.2440256  |
| H | 8.4225689 | -14.3717242 | 2.9328237  |
| H | 5.9934635 | -14.4306035 | 3.4909324  |
| H | 9.2329692 | -12.8776708 | 1.1082323  |
| H | 7.6321108 | -11.4276803 | -0.1143059 |

HEP complex  $R_1=C(CH_3)_3$   $R_2=F$

69

|          |                  |            |           |
|----------|------------------|------------|-----------|
| Energy = | -6632.5360464770 |            |           |
| H        | -2.6037962       | -5.2002435 | 2.9076439 |

|    |            |             |            |
|----|------------|-------------|------------|
| C  | -2.9004082 | -5.6178635  | 1.9463219  |
| C  | -4.1613315 | -5.3444680  | 1.4164868  |
| H  | -4.8493681 | -4.7117582  | 1.9776806  |
| C  | -4.5569802 | -5.8657524  | 0.1733605  |
| H  | -5.5478800 | -5.6310580  | -0.2161754 |
| C  | -3.7054245 | -6.6761404  | -0.5773950 |
| H  | -4.0250836 | -7.0676017  | -1.5404880 |
| C  | -2.4401180 | -6.9554100  | -0.0484424 |
| C  | -2.0456182 | -6.4308260  | 1.1959418  |
| N  | -1.3574268 | -7.7023132  | -0.5094166 |
| N  | -0.7448737 | -6.8845121  | 1.4273040  |
| C  | -1.3320578 | -8.4819222  | -1.7647817 |
| C  | -1.3822930 | -7.5648233  | -2.9890060 |
| H  | -2.3351812 | -7.0232033  | -3.0652256 |
| H  | -0.5661326 | -6.8303006  | -2.9515886 |
| H  | -1.2662765 | -8.1660509  | -3.9014418 |
| C  | -2.3933782 | -9.5858283  | -1.7579816 |
| H  | -3.4173881 | -9.1895428  | -1.7485866 |
| H  | -2.2811957 | -10.1989147 | -2.6627625 |
| H  | -2.2593765 | -10.2368696 | -0.8839231 |
| C  | -0.0389907 | -6.5635741  | 2.6944888  |
| C  | 1.1305131  | -5.6045565  | 2.4677163  |
| H  | 1.8737947  | -6.0234335  | 1.7799466  |
| H  | 0.7776114  | -4.6600194  | 2.0316167  |
| H  | 1.6129776  | -5.3821190  | 3.4303348  |
| C  | 0.3052897  | -7.8287936  | 3.4803384  |
| H  | -0.7957426 | -6.0240297  | 3.2802356  |
| H  | 1.0025531  | -8.4746624  | 2.9356128  |
| H  | 0.7585457  | -7.5459673  | 4.4409603  |
| H  | -0.5975443 | -8.4207582  | 3.6827152  |
| C  | -0.3113680 | -7.6514567  | 0.3763677  |
| H  | -0.3484396 | -8.9700630  | -1.7341731 |
| Pd | 1.4720948  | -8.5823742  | 0.0090323  |
| Br | 2.3207178  | -6.4390306  | -0.9733404 |
| Br | 0.5051071  | -10.6808796 | 0.9576086  |
| C  | 3.2110132  | -9.7187450  | -0.3809383 |
| N  | 3.3760668  | -10.6213532 | -1.4201732 |
| N  | 4.1646338  | -10.0675835 | 0.5575183  |
| C  | 4.3295917  | -11.5607082 | -1.0635472 |
| C  | 2.6595818  | -10.6741558 | -2.7595955 |
| C  | 4.8173055  | -11.2167976 | 0.1471727  |
| C  | 4.5309269  | -9.3951625  | 1.8648708  |
| C  | 6.0596438  | -9.1870031  | 1.9014195  |
| C  | 4.0509327  | -10.2995971 | 3.0125743  |
| C  | 3.8824735  | -8.0215812  | 1.9592172  |
| C  | 3.6482928  | -11.1091988 | -3.8639762 |

|   |           |             |            |
|---|-----------|-------------|------------|
| C | 2.1674968 | -9.2803674  | -3.1384769 |
| C | 1.5001807 | -11.6738320 | -2.6422417 |
| H | 0.9558812 | -11.7181500 | -3.5963840 |
| H | 0.8084862 | -11.3770965 | -1.8426489 |
| H | 1.8687952 | -12.6839070 | -2.4145452 |
| H | 3.1680738 | -10.9177910 | -4.8327844 |
| H | 3.9057556 | -12.1713350 | -3.8249969 |
| H | 4.5711821 | -10.5140519 | -3.8278942 |
| H | 1.6550717 | -9.3500877  | -4.1078991 |
| H | 2.9973079 | -8.5674586  | -3.2270837 |
| H | 1.4713717 | -8.8677029  | -2.4005971 |
| H | 4.1990963 | -7.3586149  | 1.1443536  |
| H | 4.1725972 | -7.5725202  | 2.9196067  |
| H | 2.7869906 | -8.0881676  | 1.9251030  |
| H | 4.5498301 | -11.2769678 | 2.9986100  |
| H | 2.9669178 | -10.4615634 | 2.9424968  |
| H | 4.2761800 | -9.8181998  | 3.9743829  |
| H | 6.3897575 | -8.6100129  | 1.0264683  |
| H | 6.6259928 | -10.1219897 | 1.9464177  |
| H | 6.3045458 | -8.6036541  | 2.7992182  |
| F | 4.6634759 | -12.6310615 | -1.7850083 |
| F | 5.7428295 | -11.8652922 | 0.8579053  |

HEP complex  $R_1=C(CH_3)_3$   $R_2=NH_2$

73

|          |                  |            |            |
|----------|------------------|------------|------------|
| Energy = | -6544.7411481060 |            |            |
| H        | -2.5728350       | -5.4368653 | 3.0476490  |
| C        | -2.8822388       | -5.8262544 | 2.0784943  |
| C        | -4.1728497       | -5.5935029 | 1.6022740  |
| H        | -4.8712793       | -5.0210434 | 2.2132663  |
| C        | -4.5849244       | -6.0787157 | 0.3499541  |
| H        | -5.5984630       | -5.8760084 | 0.0031071  |
| C        | -3.7215460       | -6.8135454 | -0.4631796 |
| H        | -4.0537992       | -7.1768281 | -1.4330927 |
| C        | -2.4281170       | -7.0553088 | 0.0134851  |
| C        | -2.0162287       | -6.5645358 | 1.2665795  |
| N        | -1.3291247       | -7.7312989 | -0.5124693 |
| N        | -0.6891906       | -6.9642797 | 1.4356228  |
| C        | -1.2993585       | -8.4409586 | -1.8082125 |
| C        | -1.3973997       | -7.4591607 | -2.9779895 |
| H        | -2.3656505       | -6.9403584 | -3.0059757 |
| H        | -0.5985347       | -6.7077758 | -2.9116754 |
| H        | -1.2820747       | -8.0048512 | -3.9248891 |

|    |            |             |            |
|----|------------|-------------|------------|
| C  | -2.3208936 | -9.5806845  | -1.8491713 |
| H  | -3.3587766 | -9.2231332  | -1.8164105 |
| H  | -2.1926871 | -10.1446235 | -2.7834926 |
| H  | -2.1578152 | -10.2673969 | -1.0078314 |
| C  | 0.0630690  | -6.6193161  | 2.6687978  |
| C  | 1.1267560  | -5.5539157  | 2.3965509  |
| H  | 1.8664550  | -5.8967165  | 1.6636610  |
| H  | 0.6657368  | -4.6407076  | 1.9958756  |
| H  | 1.6392883  | -5.2988889  | 3.3352359  |
| C  | 0.5761885  | -7.8666070  | 3.3868396  |
| H  | -0.6990019 | -6.1672182  | 3.3188379  |
| H  | 1.2784542  | -8.4325301  | 2.7642893  |
| H  | 1.0838109  | -7.5676866  | 4.3149016  |
| H  | -0.2519236 | -8.5415103  | 3.6412095  |
| C  | -0.2576986 | -7.6704876  | 0.3418630  |
| H  | -0.2984130 | -8.8936017  | -1.8140853 |
| Pd | 1.5413846  | -8.5394595  | -0.0796589 |
| Br | 2.2740237  | -6.3609258  | -1.0945297 |
| Br | 0.6044714  | -10.6799970 | 0.8183908  |
| C  | 3.2990805  | -9.6834878  | -0.4552781 |
| N  | 3.3847593  | -10.6718141 | -1.4302076 |
| N  | 4.1809066  | -10.0685540 | 0.5166078  |
| C  | 4.1730293  | -11.7214909 | -0.9706485 |
| C  | 2.8001150  | -10.6347664 | -2.8225521 |
| C  | 4.6900218  | -11.3533292 | 0.2390838  |
| C  | 4.6441831  | -9.2676702  | 1.7079449  |
| C  | 6.1845624  | -9.1746969  | 1.6648172  |
| C  | 4.1550389  | -9.9524863  | 2.9962898  |
| C  | 4.1097188  | -7.8408303  | 1.6453994  |
| C  | 3.9128928  | -10.9475160 | -3.8468238 |
| C  | 2.2892273  | -9.2357661  | -3.1559680 |
| C  | 1.6386650  | -11.6405634 | -2.9144189 |
| H  | 1.1422246  | -11.5405817 | -3.8900548 |
| H  | 0.9071385  | -11.4542379 | -2.1164720 |
| H  | 1.9688978  | -12.6868054 | -2.8318755 |
| H  | 3.4837469  | -10.8716682 | -4.8554512 |
| H  | 4.3498479  | -11.9436402 | -3.7274387 |
| H  | 4.7186665  | -10.2039821 | -3.7659253 |
| H  | 1.9320741  | -9.2409710  | -4.1953792 |
| H  | 3.0737595  | -8.4761962  | -3.0553477 |
| H  | 1.4652925  | -8.9297269  | -2.5010545 |
| H  | 4.4180888  | -7.3223157  | 0.7291942  |
| H  | 4.4994215  | -7.2913931  | 2.5141871  |
| H  | 3.0130346  | -7.8106972  | 1.6819581  |
| H  | 4.6343429  | -10.9285007 | 3.1373046  |
| H  | 3.0665049  | -10.0947609 | 2.9634003  |

|   |           |             |            |
|---|-----------|-------------|------------|
| H | 4.4012918 | -9.3225327  | 3.8627240  |
| H | 6.5123189 | -8.7318158  | 0.7136792  |
| H | 6.6619538 | -10.1504912 | 1.7952897  |
| H | 6.5189055 | -8.5140178  | 2.4768589  |
| N | 4.4360400 | -12.9144752 | -1.6528801 |
| N | 5.5282432 | -12.0928504 | 1.0933536  |
| H | 3.5929983 | -13.3905822 | -1.9758190 |
| H | 4.9635581 | -13.5458028 | -1.0480889 |
| H | 5.0639032 | -12.8640360 | 1.5738998  |
| H | 6.3995311 | -12.4084388 | 0.6698300  |

HEP complex  $R_1=C(CH_3)_3$   $R_2=Cl$

69

|          |                  |             |            |
|----------|------------------|-------------|------------|
| Energy = | -7353.2937109670 |             |            |
| H        | -2.6579989       | -5.4104657  | 3.0312874  |
| C        | -2.9474063       | -5.7900625  | 2.0521258  |
| C        | -4.2227802       | -5.5384966  | 1.5459849  |
| H        | -4.9284748       | -4.9602320  | 2.1429652  |
| C        | -4.6106297       | -6.0119653  | 0.2813906  |
| H        | -5.6126786       | -5.7941741  | -0.0889051 |
| C        | -3.7377110       | -6.7538784  | -0.5143639 |
| H        | -4.0513739       | -7.1083404  | -1.4935993 |
| C        | -2.4590770       | -7.0136072  | -0.0081412 |
| C        | -2.0710544       | -6.5341336  | 1.2564331  |
| N        | -1.3576498       | -7.7029203  | -0.5116814 |
| N        | -0.7527694       | -6.9518023  | 1.4553479  |
| C        | -1.3058749       | -8.3980794  | -1.8151987 |
| C        | -1.3476453       | -7.3986605  | -2.9732570 |
| H        | -2.3023797       | -6.8563959  | -3.0184328 |
| H        | -0.5336618       | -6.6674730  | -2.8761059 |
| H        | -1.2210307       | -7.9341885  | -3.9244766 |
| C        | -2.3509539       | -9.5132665  | -1.9044856 |
| H        | -3.3808897       | -9.1330096  | -1.9111738 |
| H        | -2.1974101       | -10.0723301 | -2.8378919 |
| H        | -2.2384529       | -10.2108980 | -1.0639376 |
| C        | -0.0227581       | -6.6109148  | 2.7034651  |
| C        | 1.0651283        | -5.5658124  | 2.4490670  |
| H        | 1.8165240        | -5.9263276  | 1.7366414  |
| H        | 0.6306441        | -4.6477093  | 2.0306879  |
| H        | 1.5585884        | -5.3127138  | 3.3983306  |
| C        | 0.4512159        | -7.8584966  | 3.4465747  |
| H        | -0.7923103       | -6.1404686  | 3.3309026  |
| H        | 1.1723472        | -8.4355691  | 2.8567075  |

|    |            |             |            |
|----|------------|-------------|------------|
| H  | 0.9243269  | -7.5568481  | 4.3918523  |
| H  | -0.3915324 | -8.5246883  | 3.6737218  |
| C  | -0.3080748 | -7.6596148  | 0.3691283  |
| H  | -0.3173692 | -8.8761431  | -1.7987053 |
| Pd | 1.4765342  | -8.5591152  | -0.0146461 |
| Br | 2.2589825  | -6.3937316  | -1.0166851 |
| Br | 0.4869407  | -10.6572741 | 0.9094637  |
| C  | 3.2077284  | -9.7664468  | -0.3709812 |
| N  | 3.2725347  | -10.7511850 | -1.3392667 |
| N  | 4.0804084  | -10.1664602 | 0.6220451  |
| C  | 4.0532504  | -11.8070138 | -0.8767417 |
| C  | 2.6892494  | -10.6966128 | -2.7417108 |
| C  | 4.5629532  | -11.4403881 | 0.3336407  |
| C  | 4.5595110  | -9.3482661  | 1.8059748  |
| C  | 6.0989659  | -9.2623354  | 1.7467148  |
| C  | 4.0580095  | -10.0024336 | 3.1044925  |
| C  | 4.0349919  | -7.9193750  | 1.7196581  |
| C  | 3.7862468  | -11.0690498 | -3.7628618 |
| C  | 2.2609236  | -9.2718453  | -3.0803722 |
| C  | 1.4884467  | -11.6521833 | -2.8149791 |
| H  | 1.0381258  | -11.5940399 | -3.8161425 |
| H  | 0.7355053  | -11.3763727 | -2.0644592 |
| H  | 1.7834380  | -12.6938422 | -2.6354061 |
| H  | 3.3877147  | -10.8795588 | -4.7687382 |
| H  | 4.0926551  | -12.1173112 | -3.7194968 |
| H  | 4.6720115  | -10.4329686 | -3.6272455 |
| H  | 1.8861430  | -9.2690360  | -4.1132167 |
| H  | 3.0921116  | -8.5598131  | -3.0049853 |
| H  | 1.4667837  | -8.9067871  | -2.4203412 |
| H  | 4.3376469  | -7.4168598  | 0.7929559  |
| H  | 4.4403933  | -7.3609877  | 2.5751924  |
| H  | 2.9391499  | -7.8792916  | 1.7721803  |
| H  | 4.4867689  | -10.9985604 | 3.2630256  |
| H  | 2.9643327  | -10.0962084 | 3.0841077  |
| H  | 4.3420838  | -9.3712342  | 3.9577583  |
| H  | 6.4181150  | -8.8186117  | 0.7934149  |
| H  | 6.5954718  | -10.2294523 | 1.8710172  |
| H  | 6.4402822  | -8.6035657  | 2.5566931  |
| Cl | 4.2599893  | -13.3562296 | -1.5762628 |
| Cl | 5.5364331  | -12.4513063 | 1.3146256  |

HEP complex  $R_1=C(CH_3)_3$   $R_2=Br$



Energy = -11581.6487818700

|    |            |             |            |
|----|------------|-------------|------------|
| H  | -2.5416255 | -5.2953998  | 2.9688321  |
| C  | -2.8682485 | -5.7227780  | 2.0216153  |
| C  | -4.1500983 | -5.4671604  | 1.5343880  |
| H  | -4.8249149 | -4.8379054  | 2.1152805  |
| C  | -4.5830698 | -6.0007418  | 0.3090995  |
| H  | -5.5893141 | -5.7787600  | -0.0470311 |
| C  | -3.7499973 | -6.8077445  | -0.4657941 |
| H  | -4.0980322 | -7.2069383  | -1.4157616 |
| C  | -2.4654511 | -7.0726911  | 0.0222718  |
| C  | -2.0329718 | -6.5333974  | 1.2480152  |
| N  | -1.3932381 | -7.8149295  | -0.4693633 |
| N  | -0.7208962 | -6.9723654  | 1.4382482  |
| C  | -1.3911920 | -8.5882039  | -1.7295860 |
| C  | -1.4451732 | -7.6597448  | -2.9445532 |
| H  | -2.3903221 | -7.1014997  | -2.9978880 |
| H  | -0.6149201 | -6.9410506  | -2.9122920 |
| H  | -1.3548340 | -8.2543541  | -3.8644971 |
| C  | -2.4619228 | -9.6824252  | -1.7225530 |
| H  | -3.4828480 | -9.2783269  | -1.7259990 |
| H  | -2.3464712 | -10.3002461 | -2.6234449 |
| H  | -2.3414684 | -10.3303487 | -0.8445955 |
| C  | 0.0442306  | -6.5897618  | 2.6529915  |
| C  | 1.1111223  | -5.5395281  | 2.3358095  |
| H  | 1.8446404  | -5.9122885  | 1.6107790  |
| H  | 0.6524581  | -4.6388365  | 1.9055653  |
| H  | 1.6308438  | -5.2536080  | 3.2615624  |
| C  | 0.5561956  | -7.8119426  | 3.4123841  |
| H  | -0.7111073 | -6.1125361  | 3.2926482  |
| H  | 1.2571310  | -8.4003235  | 2.8095505  |
| H  | 1.0646498  | -7.4809525  | 4.3288432  |
| H  | -0.2719251 | -8.4774149  | 3.6902909  |
| C  | -0.3200198 | -7.7450331  | 0.3797709  |
| H  | -0.4118740 | -9.0848171  | -1.7097173 |
| Pd | 1.4463468  | -8.6690624  | -0.0072913 |
| Br | 2.1791367  | -6.5420459  | -1.1306830 |
| Br | 0.4588670  | -10.7289346 | 1.0004077  |
| C  | 3.1781024  | -9.8992186  | -0.3328214 |
| N  | 3.2192635  | -10.9330855 | -1.2483940 |
| N  | 4.0558653  | -10.2580724 | 0.6723873  |
| C  | 3.9903485  | -11.9744346 | -0.7392063 |
| C  | 2.6496936  | -10.9148179 | -2.6581740 |
| C  | 4.5159386  | -11.5534476 | 0.4484162  |
| Br | 4.1792084  | -13.7262918 | -1.3961044 |
| Br | 5.5583124  | -12.6438976 | 1.5704187  |
| C  | 4.5708223  | -9.3606695  | 1.7823701  |

|   |           |             |            |
|---|-----------|-------------|------------|
| C | 6.1092545 | -9.2992681  | 1.6876839  |
| C | 4.0864272 | -9.8999552  | 3.1386321  |
| C | 4.0675663 | -7.9338634  | 1.5922763  |
| C | 3.7714437 | -11.2842827 | -3.6515270 |
| C | 2.1950557 | -9.5065628  | -3.0294504 |
| C | 1.4623184 | -11.8868652 | -2.7343292 |
| H | 1.0309645 | -11.8501456 | -3.7446619 |
| H | 0.6917349 | -11.6029789 | -2.0049705 |
| H | 1.7614529 | -12.9223736 | -2.5314451 |
| H | 3.3787322 | -11.1600714 | -4.6699941 |
| H | 4.1240381 | -12.3147168 | -3.5546907 |
| H | 4.6262948 | -10.6036007 | -3.5345230 |
| H | 1.8420814 | -9.5300834  | -4.0696174 |
| H | 3.0040870 | -8.7703241  | -2.9483197 |
| H | 1.3761688 | -9.1552910  | -2.3914104 |
| H | 4.3603743 | -7.5122727  | 0.6231376  |
| H | 4.4996146 | -7.3159357  | 2.3920070  |
| H | 2.9744800 | -7.8670755  | 1.6604832  |
| H | 4.5051028 | -10.8862639 | 3.3703354  |
| H | 2.9916019 | -9.9796948  | 3.1466471  |
| H | 4.3947866 | -9.2059185  | 3.9321233  |
| H | 6.4140130 | -8.9213141  | 0.7019539  |
| H | 6.5980207 | -10.2624933 | 1.8633167  |
| H | 6.4745344 | -8.5957460  | 2.4478574  |

HEP complex  $R_1=C(CH_3)_3$   $R_2=I$

69

|          |                  |            |            |
|----------|------------------|------------|------------|
| Energy = | -7028.4698120620 |            |            |
| H        | -2.6274965       | -5.3879538 | 3.0287287  |
| C        | -2.9272444       | -5.7759196 | 2.0560623  |
| C        | -4.2039520       | -5.5193531 | 1.5558575  |
| H        | -4.9009479       | -4.9296596 | 2.1517662  |
| C        | -4.6041090       | -6.0024780 | 0.2987652  |
| H        | -5.6075021       | -5.7819810 | -0.0664265 |
| C        | -3.7418333       | -6.7579800 | -0.4959087 |
| H        | -4.0649676       | -7.1193167 | -1.4695578 |
| C        | -2.4618521       | -7.0229521 | 0.0045275  |
| C        | -2.0626059       | -6.5355772 | 1.2626185  |
| N        | -1.3675410       | -7.7238481 | -0.4997004 |
| N        | -0.7472657       | -6.9626972 | 1.4591860  |
| C        | -1.3299951       | -8.4364853 | -1.7945989 |
| C        | -1.3938833       | -7.4539643 | -2.9663755 |
| H        | -2.3536546       | -6.9208762 | -3.0104742 |

|    |            |             |            |
|----|------------|-------------|------------|
| H  | -0.5857306 | -6.7139005  | -2.8884580 |
| H  | -1.2723197 | -8.0021559  | -3.9110106 |
| C  | -2.3732321 | -9.5555725  | -1.8492789 |
| H  | -3.4034948 | -9.1761473  | -1.8322794 |
| H  | -2.2430652 | -10.1230981 | -2.7809273 |
| H  | -2.2375077 | -10.2447750 | -1.0052624 |
| C  | -0.0119803 | -6.6217513  | 2.7043427  |
| C  | 1.0482056  | -5.5471849  | 2.4552789  |
| H  | 1.8091721  | -5.8842922  | 1.7414661  |
| H  | 0.5903309  | -4.6379332  | 2.0423608  |
| H  | 1.5344981  | -5.2869036  | 3.4064256  |
| C  | 0.5007393  | -7.8678599  | 3.4228260  |
| H  | -0.7865390 | -6.1805133  | 3.3467477  |
| H  | 1.2252191  | -8.4182276  | 2.8119571  |
| H  | 0.9829730  | -7.5690781  | 4.3643738  |
| H  | -0.3226991 | -8.5565661  | 3.6528284  |
| C  | -0.3132310 | -7.6799493  | 0.3750730  |
| H  | -0.3380922 | -8.9087118  | -1.7870124 |
| Pd | 1.4695036  | -8.5718397  | -0.0157789 |
| Br | 2.2129007  | -6.3828689  | -1.0055219 |
| Br | 0.4842151  | -10.6779685 | 0.8902646  |
| C  | 3.2101617  | -9.7889352  | -0.3731197 |
| N  | 3.2666376  | -10.7734683 | -1.3396417 |
| N  | 4.0645651  | -10.2025490 | 0.6291489  |
| C  | 4.0183798  | -11.8513198 | -0.8691422 |
| C  | 2.7286887  | -10.6598658 | -2.7576857 |
| C  | 4.5212137  | -11.4930687 | 0.3557376  |
| C  | 4.5556506  | -9.3462314  | 1.7827140  |
| C  | 6.0953833  | -9.2857768  | 1.7289471  |
| C  | 4.0297980  | -9.9215056  | 3.1079037  |
| C  | 4.0664013  | -7.9091374  | 1.6307346  |
| C  | 3.8646300  | -10.9871798 | -3.7487256 |
| C  | 2.3096006  | -9.2236166  | -3.0583036 |
| C  | 1.5213254  | -11.5962774 | -2.9183043 |
| H  | 1.1110476  | -11.4862778 | -3.9322765 |
| H  | 0.7430996  | -11.3412530 | -2.1863338 |
| H  | 1.7906087  | -12.6504050 | -2.7769608 |
| H  | 3.5003852  | -10.7841029 | -4.7651353 |
| H  | 4.1926261  | -12.0304867 | -3.7184193 |
| H  | 4.7316643  | -10.3377221 | -3.5640094 |
| H  | 1.9673690  | -9.1867944  | -4.1017761 |
| H  | 3.1351842  | -8.5124531  | -2.9341086 |
| H  | 1.4938881  | -8.8816278  | -2.4123732 |
| H  | 4.3685596  | -7.4612998  | 0.6766442  |
| H  | 4.5010456  | -7.3197726  | 2.4503609  |
| H  | 2.9740987  | -7.8320699  | 1.6986172  |

|   |           |             |            |
|---|-----------|-------------|------------|
| H | 4.4431653 | -10.9120675 | 3.3309456  |
| H | 2.9357652 | -10.0046682 | 3.0763141  |
| H | 4.3088364 | -9.2467423  | 3.9287137  |
| H | 6.4257794 | -8.8613542  | 0.7707434  |
| H | 6.5797681 | -10.2576132 | 1.8692430  |
| H | 6.4434243 | -8.6226497  | 2.5323994  |
| I | 4.2054292 | -13.7787650 | -1.6595792 |
| I | 5.6195744 | -12.7967728 | 1.5667326  |

HEP complex  $R_1=C(CH_3)_3$   $R_2=OCH_3$

77

|          |                  |             |            |
|----------|------------------|-------------|------------|
| Energy = | -6663.1172748200 |             |            |
| H        | -2.5974689       | -5.2985115  | 2.9972520  |
| C        | -2.9162024       | -5.7406582  | 2.0540498  |
| C        | -4.2173595       | -5.5496179  | 1.5885795  |
| H        | -4.9137909       | -4.9564636  | 2.1818372  |
| C        | -4.6423841       | -6.1026774  | 0.3691560  |
| H        | -5.6644211       | -5.9319203  | 0.0299530  |
| C        | -3.7816014       | -6.8655381  | -0.4204744 |
| H        | -4.1244368       | -7.2822514  | -1.3647782 |
| C        | -2.4770285       | -7.0648600  | 0.0456764  |
| C        | -2.0522112       | -6.5058545  | 1.2650611  |
| N        | -1.3765985       | -7.7507538  | -0.4646606 |
| N        | -0.7162442       | -6.8766231  | 1.4303796  |
| C        | -1.3680120       | -8.5430730  | -1.7118392 |
| C        | -1.4958949       | -7.6410636  | -2.9414617 |
| H        | -2.4688939       | -7.1322749  | -2.9843475 |
| H        | -0.7033055       | -6.8800028  | -2.9397179 |
| H        | -1.3935309       | -8.2464720  | -3.8528395 |
| C        | -2.3825500       | -9.6889387  | -1.6569539 |
| H        | -3.4225022       | -9.3369501  | -1.6355029 |
| H        | -2.2617617       | -10.3176369 | -2.5498172 |
| H        | -2.2019857       | -10.3137288 | -0.7722694 |
| C        | 0.0399821        | -6.4842242  | 2.6467967  |
| C        | 1.1068334        | -5.4329750  | 2.3350328  |
| H        | 1.8368012        | -5.7974320  | 1.6033094  |
| H        | 0.6463816        | -4.5282728  | 1.9147206  |
| H        | 1.6299948        | -5.1557596  | 3.2614447  |
| C        | 0.5438883        | -7.7076395  | 3.4122337  |
| H        | -0.7195758       | -6.0045442  | 3.2794860  |
| H        | 1.2383976        | -8.3058431  | 2.8116203  |
| H        | 1.0553024        | -7.3787444  | 4.3279427  |
| H        | -0.2915709       | -8.3625002  | 3.6941273  |
| C        | -0.2905493       | -7.6286146  | 0.3644567  |

|    |            |             |            |
|----|------------|-------------|------------|
| H  | -0.3660659 | -8.9931148  | -1.7085474 |
| Pd | 1.5280303  | -8.4672747  | -0.0586448 |
| Br | 2.2201245  | -6.3012725  | -1.1248081 |
| Br | 0.6599301  | -10.6130013 | 0.8878732  |
| C  | 3.3147053  | -9.5519654  | -0.4393546 |
| N  | 3.5038686  | -10.4827193 | -1.4430530 |
| N  | 4.2116261  | -9.9028546  | 0.5477533  |
| C  | 4.4173478  | -11.4550871 | -1.0265993 |
| C  | 2.8605117  | -10.5414236 | -2.8099941 |
| C  | 4.8388522  | -11.1076464 | 0.2214081  |
| O  | 4.7194556  | -12.5703790 | -1.7402055 |
| O  | 5.6797882  | -11.7903472 | 1.0460840  |
| C  | 4.6275529  | -9.1114472  | 1.7663085  |
| C  | 6.1651073  | -8.9764425  | 1.7548597  |
| C  | 4.1357761  | -9.8406534  | 3.0279504  |
| C  | 4.0511021  | -7.7012193  | 1.7184282  |
| C  | 3.9561886  | -10.7400690 | -3.8802699 |
| C  | 2.1664944  | -9.2246946  | -3.1361940 |
| C  | 1.8526954  | -11.7022455 | -2.8206797 |
| H  | 1.3457738  | -11.7404729 | -3.7954462 |
| H  | 1.1008634  | -11.5619255 | -2.0323433 |
| H  | 2.3521200  | -12.6657665 | -2.6555800 |
| H  | 3.4967096  | -10.6138608 | -4.8700003 |
| H  | 4.4096924  | -11.7344687 | -3.8447347 |
| H  | 4.7400292  | -9.9759581  | -3.7779172 |
| H  | 1.7388778  | -9.3062470  | -4.1454649 |
| H  | 2.8568153  | -8.3726315  | -3.1107923 |
| H  | 1.3578563  | -9.0005465  | -2.4317586 |
| H  | 4.3690200  | -7.1563708  | 0.8206411  |
| H  | 4.4006298  | -7.1581264  | 2.6080172  |
| H  | 2.9535135  | -7.7063739  | 1.7229275  |
| H  | 4.6405114  | -10.8057743 | 3.1587209  |
| H  | 3.0525927  | -10.0139223 | 2.9734898  |
| H  | 4.3514743  | -9.2264145  | 3.9133962  |
| H  | 6.4968189  | -8.4798438  | 0.8320587  |
| H  | 6.6757922  | -9.9398898  | 1.8461453  |
| H  | 6.4658849  | -8.3449825  | 2.6023872  |
| C  | 5.1302093  | -13.0458594 | 1.5240370  |
| C  | 6.1294071  | -12.7577502 | -2.0067584 |
| H  | 6.5175401  | -11.9283819 | -2.6169064 |
| H  | 6.2066173  | -13.6986102 | -2.5629742 |
| H  | 6.7013865  | -12.8251059 | -1.0710167 |
| H  | 5.8859043  | -13.4658596 | 2.1976706  |
| H  | 4.9470613  | -13.7348738 | 0.6870293  |
| H  | 4.1900059  | -12.8714357 | 2.0669047  |

HEP complex  $R_1=C(CH_3)_3$   $R_2=COH$

73

|          |                  |             |            |
|----------|------------------|-------------|------------|
| Energy = | -6660.7212163300 |             |            |
| H        | -2.7031716       | -5.2740497  | 2.8763364  |
| C        | -2.9414417       | -5.6478838  | 1.8813054  |
| C        | -4.1643391       | -5.3383412  | 1.2871096  |
| H        | -4.8775171       | -4.7163922  | 1.8285619  |
| C        | -4.4929823       | -5.8163985  | 0.0077026  |
| H        | -5.4580122       | -5.5594600  | -0.4297301 |
| C        | -3.6099326       | -6.6171417  | -0.7158342 |
| H        | -3.8813517       | -6.9808519  | -1.7042889 |
| C        | -2.3815057       | -6.9308515  | -0.1224908 |
| C        | -2.0543101       | -6.4520788  | 1.1585801  |
| N        | -1.2890041       | -7.6906771  | -0.5362940 |
| N        | -0.7808119       | -6.9443300  | 1.4577230  |
| C        | -1.1665463       | -8.3575783  | -1.8497795 |
| C        | -1.1646334       | -7.3373716  | -2.9911000 |
| H        | -2.1156808       | -6.7942940  | -3.0724293 |
| H        | -0.3543739       | -6.6098579  | -2.8495506 |
| H        | -0.9950903       | -7.8593051  | -3.9429591 |
| C        | -2.2027158       | -9.4736369  | -2.0027939 |
| H        | -3.2312868       | -9.0891149  | -2.0250498 |
| H        | -2.0279118       | -10.0085154 | -2.9463709 |
| H        | -2.1205435       | -10.1927353 | -1.1765586 |
| C        | -0.1071535       | -6.5683231  | 2.7276270  |
| C        | 1.1847711        | -5.7946114  | 2.4683393  |
| H        | 1.9184629        | -6.3984793  | 1.9248082  |
| H        | 0.9875964        | -4.8959423  | 1.8684371  |
| H        | 1.6210357        | -5.4825212  | 3.4279955  |
| C        | 0.0283033        | -7.7545124  | 3.6820517  |
| H        | -0.8114529       | -5.8631023  | 3.1895530  |
| H        | 0.6609518        | -8.5478028  | 3.2684368  |
| H        | 0.4614741        | -7.4082628  | 4.6311680  |
| H        | -0.9540362       | -8.1992053  | 3.8921730  |
| C        | -0.3111621       | -7.7165071  | 0.4253835  |
| H        | -0.1676504       | -8.8130113  | -1.8071599 |
| Pd       | 1.4047364        | -8.8247435  | 0.1579826  |
| Br       | 2.4301236        | -6.8581127  | -0.9952205 |
| Br       | 0.3542436        | -10.7062155 | 1.4463922  |
| C        | 3.0929344        | -10.0184699 | -0.2150404 |
| N        | 3.3584831        | -10.7936988 | -1.3541380 |
| N        | 4.1460874        | -10.2537645 | 0.6258283  |
| C        | 4.5513916        | -11.4649588 | -1.2060341 |

|   |           |             |            |
|---|-----------|-------------|------------|
| C | 2.4167841 | -10.9779401 | -2.5456457 |
| C | 5.0340142 | -11.1737783 | 0.0518197  |
| C | 5.3775220 | -12.2535953 | -2.1925766 |
| C | 6.1953603 | -11.8693788 | 0.5917516  |
| C | 4.4519607 | -9.6231444  | 1.9727470  |
| C | 5.9087307 | -9.1101620  | 1.9578437  |
| C | 4.1918637 | -10.6767959 | 3.0651696  |
| C | 3.5783212 | -8.4062975  | 2.2422507  |
| C | 2.8763349 | -12.1328432 | -3.4501921 |
| C | 2.4026858 | -9.6836146  | -3.3670839 |
| C | 1.0298688 | -11.3629613 | -2.0214950 |
| H | 0.3488972 | -11.4642895 | -2.8776890 |
| H | 0.6242253 | -10.6195811 | -1.3277101 |
| H | 1.0623388 | -12.3214757 | -1.4859914 |
| H | 2.0525086 | -12.3396427 | -4.1456504 |
| H | 3.0549425 | -13.0615802 | -2.8866164 |
| H | 3.7597271 | -11.8895890 | -4.0463716 |
| H | 1.7162846 | -9.8064786  | -4.2169447 |
| H | 3.4046637 | -9.4703842  | -3.7637696 |
| H | 2.0852785 | -8.8206998  | -2.7697481 |
| H | 3.7296837 | -7.6246453  | 1.4869037  |
| H | 3.8577403 | -8.0047272  | 3.2268186  |
| H | 2.5131808 | -8.6668525  | 2.2707326  |
| H | 4.8073719 | -11.5781133 | 2.9490501  |
| H | 3.1344515 | -10.9757577 | 3.0470099  |
| H | 4.4166557 | -10.2425722 | 4.0491603  |
| H | 6.0616775 | -8.4240936  | 1.1138760  |
| H | 6.6685464 | -9.8974687  | 1.9063932  |
| H | 6.0872760 | -8.5503504  | 2.8853208  |
| O | 5.9134469 | -11.7256266 | -3.1467864 |
| O | 6.9331477 | -12.5398106 | -0.1279592 |
| H | 6.3727020 | -11.8306545 | 1.6850663  |
| H | 5.4812990 | -13.3377922 | -1.9733660 |

HEP complex  $R_1=C(CH_3)_3$   $R_2=COCH_3$

79

|          |                  |            |            |
|----------|------------------|------------|------------|
| Energy = | -6739.3811413590 |            |            |
| H        | -2.7224547       | -5.4429429 | 3.0200686  |
| C        | -2.9916033       | -5.8288056 | 2.0375687  |
| C        | -4.2667392       | -5.6074306 | 1.5174129  |
| H        | -4.9924504       | -5.0459443 | 2.1061362  |
| C        | -4.6300123       | -6.0918303 | 0.2497130  |
| H        | -5.6337372       | -5.9002153 | -0.1305028 |
| C        | -3.7312503       | -6.8134666 | -0.5359316 |

|    |            |             |            |
|----|------------|-------------|------------|
| H  | -4.0274041 | -7.1784412  | -1.5167275 |
| C  | -2.4522502 | -7.0424074  | -0.0158158 |
| C  | -2.0898537 | -6.5542977  | 1.2531981  |
| N  | -1.3287484 | -7.7067537  | -0.5053719 |
| N  | -0.7654595 | -6.9436837  | 1.4694517  |
| C  | -1.2385671 | -8.3954825  | -1.8113637 |
| C  | -1.3223530 | -7.3956675  | -2.9670549 |
| H  | -2.2986055 | -6.8938236  | -3.0125017 |
| H  | -0.5393209 | -6.6316937  | -2.8677249 |
| H  | -1.1727707 | -7.9236759  | -3.9190863 |
| C  | -2.2345549 | -9.5541307  | -1.9038709 |
| H  | -3.2794679 | -9.2162282  | -1.8990728 |
| H  | -2.0655348 | -10.0997956 | -2.8424403 |
| H  | -2.0879462 | -10.2529672 | -1.0693767 |
| C  | -0.0569925 | -6.5755811  | 2.7223454  |
| C  | 1.0245022  | -5.5236150  | 2.4674642  |
| H  | 1.7903476  | -5.8867495  | 1.7721752  |
| H  | 0.5874336  | -4.6165736  | 2.0280998  |
| H  | 1.5009419  | -5.2506107  | 3.4200707  |
| C  | 0.4170111  | -7.8057670  | 3.4939843  |
| H  | -0.8394524 | -6.1016323  | 3.3306370  |
| H  | 1.1521454  | -8.3863346  | 2.9250373  |
| H  | 0.8730407  | -7.4838196  | 4.4409153  |
| H  | -0.4226093 | -8.4760386  | 3.7201246  |
| C  | -0.2940166 | -7.6454014  | 0.3906391  |
| H  | -0.2264035 | -8.8249115  | -1.7941744 |
| Pd | 1.5036757  | -8.5340692  | 0.0089799  |
| Br | 2.2481113  | -6.3385041  | -0.9874184 |
| Br | 0.5596501  | -10.6140936 | 1.0068131  |
| C  | 3.2353265  | -9.7095133  | -0.3794835 |
| N  | 3.3631161  | -10.6448715 | -1.4073451 |
| N  | 4.1725349  | -10.0689175 | 0.5479016  |
| C  | 4.2590237  | -11.6269209 | -1.0508775 |
| C  | 2.6366802  | -10.5990777 | -2.7491325 |
| C  | 4.7795815  | -11.2998615 | 0.1910486  |
| C  | 4.5269246  | -12.9412960 | -1.7756576 |
| C  | 5.6269326  | -12.3164669 | 0.8624723  |
| C  | 4.5706042  | -9.2558397  | 1.7570270  |
| C  | 6.1033566  | -9.0563756  | 1.7071993  |
| C  | 4.0250189  | -9.9514059  | 3.0190065  |
| C  | 3.9942602  | -7.8421739  | 1.7180109  |
| C  | 3.5332013  | -11.1755095 | -3.8609554 |
| C  | 2.3592529  | -9.1473721  | -3.1386930 |
| C  | 1.3405392  | -11.4155147 | -2.6353335 |
| H  | 0.8061979  | -11.3775358 | -3.5953839 |
| H  | 0.6942895  | -11.0157942 | -1.8431409 |



|   |           |             |            |
|---|-----------|-------------|------------|
| H | 1.5627601 | -12.4633592 | -2.3951438 |
| H | 3.0908239 | -10.8877013 | -4.8237781 |
| H | 3.5866956 | -12.2675170 | -3.8505643 |
| H | 4.5451180 | -10.7478157 | -3.8262061 |
| H | 1.8405947 | -9.1460780  | -4.1068697 |
| H | 3.2898611 | -8.5725937  | -3.2412664 |
| H | 1.7398787 | -8.6182237  | -2.4093222 |
| H | 4.2576680 | -7.3071826  | 0.7978093  |
| H | 4.4073728 | -7.2934439  | 2.5775485  |
| H | 2.8993402 | -7.8373450  | 1.8048627  |
| H | 4.2974498 | -11.0083288 | 3.0946173  |
| H | 2.9278846 | -9.9100404  | 3.0041999  |
| H | 4.3868468 | -9.4336014  | 3.9183724  |
| H | 6.3452926 | -8.3346825  | 0.9150268  |
| H | 6.6787312 | -9.9620719  | 1.5109003  |
| H | 6.4463401 | -8.6352626  | 2.6619143  |
| O | 3.6152089 | -13.7474240 | -1.8810279 |
| O | 5.7273659 | -13.3985871 | 0.2677427  |
| C | 6.4145449 | -12.2085967 | 2.1551002  |
| C | 5.8715028 | -13.1412594 | -2.4458206 |
| H | 6.6555950 | -12.5082282 | -2.0142385 |
| H | 5.7704403 | -12.8914766 | -3.5128888 |
| H | 6.1549761 | -14.1966337 | -2.3666046 |
| H | 6.1131916 | -11.4269757 | 2.8514073  |
| H | 7.4712433 | -12.0440777 | 1.8900312  |
| H | 6.3574609 | -13.1888002 | 2.6443843  |

HEP complex  $R_1=C(CH_3)_3$   $R_2=COOCH_3$

81

|          |                  |            |            |
|----------|------------------|------------|------------|
| Energy = | -6889.9358671010 |            |            |
| H        | -2.5950394       | -5.2883355 | 2.9519653  |
| C        | -2.9028515       | -5.7400930 | 2.0097477  |
| C        | -4.1890659       | -5.5309176 | 1.5121796  |
| H        | -4.8858474       | -4.9121866 | 2.0781676  |
| C        | -4.5988500       | -6.0981273 | 0.2940975  |
| H        | -5.6093598       | -5.9129309 | -0.0710448 |
| C        | -3.7377900       | -6.8931632 | -0.4623551 |
| H        | -4.0709293       | -7.3219368 | -1.4046673 |
| C        | -2.4475234       | -7.1090118 | 0.0347498  |
| C        | -2.0388472       | -6.5375173 | 1.2536847  |
| N        | -1.3505486       | -7.8266674 | -0.4384266 |
| N        | -0.7157680       | -6.9356545 | 1.4588317  |
| C        | -1.3208613       | -8.6168204 | -1.6875596 |
| C        | -1.4271582       | -7.7075697 | -2.9148155 |
| H        | -2.3998051       | -7.1996863 | -2.9715542 |
| H        | -0.6351691       | -6.9461680 | -2.8953495 |

|    |            |             |            |
|----|------------|-------------|------------|
| H  | -1.3090936 | -8.3073940  | -3.8279678 |
| C  | -2.3426288 | -9.7567878  | -1.6573221 |
| H  | -3.3798767 | -9.3960774  | -1.6568556 |
| H  | -2.2087306 | -10.3828674 | -2.5502548 |
| H  | -2.1878042 | -10.3857979 | -0.7707805 |
| C  | 0.0343940  | -6.4885650  | 2.6602686  |
| C  | 1.0423836  | -5.3899595  | 2.3151976  |
| H  | 1.8057967  | -5.7469388  | 1.6129513  |
| H  | 0.5393707  | -4.5325078  | 1.8471733  |
| H  | 1.5321900  | -5.0408223  | 3.2353007  |
| C  | 0.6205409  | -7.6619040  | 3.4394818  |
| H  | -0.7423663 | -6.0407610  | 3.2951375  |
| H  | 1.3605215  | -8.2098082  | 2.8460689  |
| H  | 1.1055047  | -7.2854061  | 4.3510324  |
| H  | -0.1629828 | -8.3750717  | 3.7269995  |
| C  | -0.2856660 | -7.7165665  | 0.4178317  |
| H  | -0.3191962 | -9.0682668  | -1.6744397 |
| Pd | 1.5032523  | -8.6294962  | 0.0512618  |
| Br | 2.2323162  | -6.4833007  | -1.0566897 |
| Br | 0.5372972  | -10.6708710 | 1.1118095  |
| C  | 3.2498197  | -9.7775444  | -0.3148112 |
| N  | 3.4778959  | -10.6427877 | -1.3766833 |
| N  | 4.2006668  | -10.1016924 | 0.6234120  |
| C  | 4.5113843  | -11.5132615 | -1.0656580 |
| C  | 2.6701550  | -10.7340445 | -2.6674753 |
| C  | 4.9496985  | -11.2054416 | 0.1955215  |
| C  | 4.9926005  | -12.7095162 | -1.8384952 |
| C  | 5.8627619  | -12.1288905 | 0.9143189  |
| C  | 4.5721574  | -9.2740186  | 1.8480004  |
| C  | 6.1044937  | -9.2909416  | 2.0182356  |
| C  | 3.8531713  | -9.8330971  | 3.0853608  |
| C  | 4.1858118  | -7.8107632  | 1.6294961  |
| C  | 3.5415212  | -11.2649399 | -3.8195610 |
| C  | 2.2033168  | -9.3424897  | -3.0902251 |
| C  | 1.4915832  | -11.6871328 | -2.4224091 |
| H  | 0.8838018  | -11.7553276 | -3.3361044 |
| H  | 0.8619761  | -11.3336244 | -1.5953783 |
| H  | 1.8500232  | -12.6946582 | -2.1698477 |
| H  | 2.9816753  | -11.1029679 | -4.7502007 |
| H  | 3.7350238  | -12.3414927 | -3.7560104 |
| H  | 4.4913557  | -10.7214746 | -3.9017502 |
| H  | 1.6303518  | -9.4396342  | -4.0227278 |
| H  | 3.0510872  | -8.6680966  | -3.2677109 |
| H  | 1.5689516  | -8.8633058  | -2.3387028 |
| H  | 4.6277157  | -7.3991042  | 0.7131248  |
| H  | 4.5479838  | -7.2305149  | 2.4898435  |

|   |           |             |            |
|---|-----------|-------------|------------|
| H | 3.1002260 | -7.6712814  | 1.5558001  |
| H | 4.1901688 | -10.8470830 | 3.3218878  |
| H | 2.7694518 | -9.8654192  | 2.9150440  |
| H | 4.0578710 | -9.1835003  | 3.9479162  |
| H | 6.6072221 | -8.9655993  | 1.0967310  |
| H | 6.5035200 | -10.2624415 | 2.3231061  |
| H | 6.3640867 | -8.5769919  | 2.8108247  |
| O | 4.4572707 | -13.7999420 | -1.7913535 |
| O | 6.7916881 | -12.7033952 | 0.3733789  |
| O | 5.4872351 | -12.3693433 | 2.1963790  |
| O | 6.1074646 | -12.4240334 | -2.5366573 |
| C | 6.3022661 | -13.3406346 | 2.8952412  |
| H | 6.2573010 | -14.3107584 | 2.3856152  |
| H | 5.8694410 | -13.4090735 | 3.8977943  |
| H | 7.3465037 | -13.0049979 | 2.9420685  |
| C | 6.7003314 | -13.5496268 | -3.2266012 |
| H | 6.9841743 | -14.3231007 | -2.5025419 |
| H | 7.5821153 | -13.1459903 | -3.7324680 |
| H | 5.9910096 | -13.9702785 | -3.9518031 |
